# Supplementary material
Source: MDPI journal article supplement (https://www.mdpi.com/2304-6740/9/3/20)
Supplement: s1 [file s1]

Archive with 5 entries (5 files):
- checkcif_Compound1.pdf
- checkcif_Compound2.pdf
- Compound1.cif
- Compound2.cif
- inorganics-1095869-supplementary.pdf
