# Supplementary material
Source: MDPI journal article supplement (https://www.mdpi.com/2304-6740/9/3/20)
Supplement: s1 [file s1 › Compound1.cif]

 
data_Compound1
 
_audit_creation_method            SHELXL-2014
_chemical_name_systematic
;
 ?
;
_chemical_name_common             ?
_chemical_melting_point           ?
_chemical_formula_moiety          ?
_chemical_formula_sum
 'C8 H6 N2 O3 Zn' 
_chemical_formula_weight          243.52

loop_
 _atom_type_symbol
 _atom_type_description
 _atom_type_scat_dispersion_real
 _atom_type_scat_dispersion_imag
 _atom_type_scat_source
 'C'  'C'   0.0033   0.0016
 'International Tables Vol C Tables 4.2.6.8 and 6.1.1.4'
 'H'  'H'   0.0000   0.0000
 'International Tables Vol C Tables 4.2.6.8 and 6.1.1.4'
 'N'  'N'   0.0061   0.0033
 'International Tables Vol C Tables 4.2.6.8 and 6.1.1.4'
 'O'  'O'   0.0106   0.0060
 'International Tables Vol C Tables 4.2.6.8 and 6.1.1.4'
 'Zn'  'Zn'   0.2839   1.4301
 'International Tables Vol C Tables 4.2.6.8 and 6.1.1.4'
 
_space_group_crystal_system       monoclinic
_space_group_IT_number            14
_space_group_name_H-M_alt         'P 21/n'
_space_group_name_Hall            '-P 2yn'
 
_shelx_space_group_comment
;
The symmetry employed for this shelxl refinement is uniquely defined
by the following loop, which should always be used as a source of
symmetry information in preference to the above space-group names.
They are only intended as comments.
;
 
loop_
 _space_group_symop_operation_xyz
 'x, y, z'
 '-x+1/2, y+1/2, -z+1/2'
 '-x, -y, -z'
 'x-1/2, -y-1/2, z-1/2'
 
_cell_length_a                    9.774(3)
_cell_length_b                    5.7633(15)
_cell_length_c                    14.592(4)
_cell_angle_alpha                 90
_cell_angle_beta                  95.626(7)
_cell_angle_gamma                 90
_cell_volume                      818.0(4)
_cell_formula_units_Z             4
_cell_measurement_temperature     100(2)
_cell_measurement_reflns_used     1289 
_cell_measurement_theta_min       2.63 
_cell_measurement_theta_max       22.03 
 
_exptl_crystal_description        'Prismatic'
_exptl_crystal_colour             'Colourless' 
_exptl_crystal_density_meas       ? 
_exptl_crystal_density_method     ?              
_exptl_crystal_density_diffrn     1.977          
_exptl_crystal_F_000              488
_exptl_transmission_factor_min    ?                                             
_exptl_transmission_factor_max    ?                                             
_exptl_crystal_size_max           0.08 
_exptl_crystal_size_mid           0.08 
_exptl_crystal_size_min           0.07 
_exptl_absorpt_coefficient_mu     2.979
_shelx_estimated_absorpt_T_min    ? 
_shelx_estimated_absorpt_T_max    ? 
_exptl_absorpt_correction_type    'Empirical'  
_exptl_absorpt_correction_T_min   0.662 
_exptl_absorpt_correction_T_max   0.745 
_exptl_absorpt_process_details
;
SADABS-2014/3 (Bruker,2014/3) was used for absorption correction.
wR2(int) was 0.0706 before and 0.0469 after correction.
The Ratio of minimum to maximum transmission is 0.9433.
The \l/2 correction factor is 0.00150.
;
 
_exptl_special_details
;
 ?
;
 
_diffrn_ambient_temperature       100(2)
_diffrn_radiation_wavelength      0.71073
_diffrn_radiation_type            MoK\a
_diffrn_source                    'fine-focus sealed tube'
_diffrn_measurement_device_type   'Bruker D8 Venture'
_diffrn_measurement_method        'Phi and Omega Scans'
_diffrn_detector_area_resol_mean  ? 
_diffrn_reflns_number             6792
_diffrn_reflns_av_unetI/netI      0.0683
_diffrn_reflns_av_R_equivalents   0.1342
_diffrn_reflns_limit_h_min        -10
_diffrn_reflns_limit_h_max        10
_diffrn_reflns_limit_k_min        -5
_diffrn_reflns_limit_k_max        6
_diffrn_reflns_limit_l_min        -15
_diffrn_reflns_limit_l_max        15
_diffrn_reflns_theta_min          2.403
_diffrn_reflns_theta_max          22.251
_diffrn_reflns_theta_full         25.242
_diffrn_measured_fraction_theta_max   0.998
_diffrn_measured_fraction_theta_full  0.701
_diffrn_reflns_Laue_measured_fraction_max    0.998
_diffrn_reflns_Laue_measured_fraction_full   0.701
_diffrn_reflns_point_group_measured_fraction_max   0.998
_diffrn_reflns_point_group_measured_fraction_full  0.701
_reflns_number_total              1035
_reflns_number_gt                 817
_reflns_threshold_expression      'I > 2\s(I)'
_reflns_Friedel_coverage          0.000
_reflns_Friedel_fraction_max      .
_reflns_Friedel_fraction_full     .
 
_reflns_special_details
;
 Reflections were merged by SHELXL according to the crystal
 class for the calculation of statistics and refinement.
 
 _reflns_Friedel_fraction is defined as the number of unique
 Friedel pairs measured divided by the number that would be
 possible theoretically, ignoring centric projections and
 systematic absences.
;
 
_computing_data_collection        'Bruker ApexII'
_computing_cell_refinement        'Bruker Apex II'
_computing_data_reduction         'Bruker Apex II'
_computing_structure_solution     'SHELXL-2014 (Sheldrick, 2014)'
_computing_structure_refinement   'SHELXL-2014 (Sheldrick, 2014)'
_computing_molecular_graphics     ?
_computing_publication_material   'SHELXL-2014 (Sheldrick, 2014)'
 
 
_refine_special_details
;
 ?
;
_refine_ls_structure_factor_coef  Fsqd
_refine_ls_matrix_type            full
_refine_ls_weighting_scheme       calc
_refine_ls_weighting_details
'w=1/[\s^2^(Fo^2^)+(0.0319P)^2^+6.9969P] where P=(Fo^2^+2Fc^2^)/3'
_atom_sites_solution_primary      ?
_atom_sites_solution_secondary    ?
_atom_sites_solution_hydrogens    mixed
_refine_ls_hydrogen_treatment     constr
_refine_ls_extinction_method      none
_refine_ls_extinction_coef        .
_refine_ls_number_reflns          1035
_refine_ls_number_parameters      127
_refine_ls_number_restraints      51
_refine_ls_R_factor_all           0.0777
_refine_ls_R_factor_gt            0.0535
_refine_ls_wR_factor_ref          0.1075
_refine_ls_wR_factor_gt           0.0994
_refine_ls_goodness_of_fit_ref    1.082
_refine_ls_restrained_S_all       1.203
_refine_ls_shift/su_max           0.000
_refine_ls_shift/su_mean          0.000
 
loop_
 _atom_site_label
 _atom_site_type_symbol
 _atom_site_fract_x
 _atom_site_fract_y
 _atom_site_fract_z
 _atom_site_U_iso_or_equiv
 _atom_site_adp_type
 _atom_site_occupancy
 _atom_site_site_symmetry_order  
 _atom_site_calc_flag
 _atom_site_refinement_flags_posn
 _atom_site_refinement_flags_adp
 _atom_site_refinement_flags_occupancy
 _atom_site_disorder_assembly
 _atom_site_disorder_group
Zn1 Zn 0.16129(10) 1.09101(17) 1.05202(6) 0.0078(3) Uani 1 1 d . . . . .
C1 C 0.0306(8) 0.5592(15) 0.8771(5) 0.0079(19) Uani 1 1 d . U . . .
H1 H -0.0386 0.4624 0.8507 0.010 Uiso 1 1 calc R U . . .
C2 C 0.2341(8) 0.7181(14) 0.9208(5) 0.0037(18) Uani 1 1 d . U . . .
C3 C 0.1717(8) 0.5273(13) 0.8705(5) 0.0067(19) Uani 1 1 d . U . . .
C4 C 0.2553(8) 0.3666(14) 0.8293(5) 0.010(2) Uani 1 1 d . . . . .
H4 H 0.2171 0.2384 0.7976 0.012 Uiso 1 1 calc R U . . .
C5 C 0.3947(8) 0.4045(15) 0.8371(5) 0.0103(19) Uani 1 1 d . U . . .
H5 H 0.4509 0.3020 0.8089 0.012 Uiso 1 1 calc R U . . .
C6 C 0.4554(8) 0.5958(15) 0.8873(5) 0.0082(18) Uani 1 1 d . U . . .
C7 C 0.3754(8) 0.7491(14) 0.9293(5) 0.0066(19) Uani 1 1 d . U . . .
H7 H 0.4151 0.8726 0.9632 0.008 Uiso 1 1 calc R U . . .
N1 N 0.1343(6) 0.8490(11) 0.9553(4) 0.0086(17) Uani 1 1 d . . . . .
N2 N 0.0099(7) 0.7468(11) 0.9263(4) 0.0080(16) Uani 1 1 d . . . . .
O1 O 0.6562(5) 0.7818(10) 0.9520(3) 0.0123(14) Uani 1 1 d . . . . .
O2 O 0.6816(6) 0.5214(10) 0.8434(4) 0.0134(14) Uani 1 1 d . U . . .
C8 C 0.6080(8) 0.6330(14) 0.8944(5) 0.0081(19) Uani 1 1 d . U . . .
O1W O 0.2024(6) 0.8943(11) 1.1659(4) 0.0222(15) Uani 1 1 d D . . . .
H11W H 0.1739 0.9046 1.2287 0.027 Uiso 1 1 d DR U . . .
H12W H 0.2772 0.7847 1.1565 0.027 Uiso 1 1 d DR U . . .
 
loop_
 _atom_site_aniso_label
 _atom_site_aniso_U_11
 _atom_site_aniso_U_22
 _atom_site_aniso_U_33
 _atom_site_aniso_U_23
 _atom_site_aniso_U_13
 _atom_site_aniso_U_12
Zn1 0.0095(5) 0.0119(6) 0.0021(5) -0.0026(5) 0.0016(3) -0.0004(5)
C1 0.008(2) 0.008(2) 0.008(2) -0.0003(10) 0.0005(10) 0.0000(10)
C2 0.004(2) 0.004(2) 0.0031(19) 0.0001(10) 0.0001(10) 0.0000(10)
C3 0.007(2) 0.006(2) 0.006(2) 0.0004(10) 0.0005(10) -0.0001(10)
C4 0.020(5) 0.005(5) 0.005(4) 0.000(4) -0.004(4) 0.000(4)
C5 0.010(2) 0.010(2) 0.010(2) -0.0001(10) 0.0015(10) 0.0004(10)
C6 0.008(2) 0.009(2) 0.008(2) 0.0000(10) 0.0011(10) 0.0003(10)
C7 0.007(2) 0.007(2) 0.006(2) 0.0000(10) 0.0009(10) -0.0001(10)
N1 0.005(4) 0.011(4) 0.009(4) -0.001(3) -0.002(3) -0.001(3)
N2 0.012(4) 0.005(4) 0.006(4) -0.001(3) -0.003(3) -0.004(3)
O1 0.011(3) 0.021(4) 0.004(3) -0.005(3) 0.001(2) -0.001(3)
O2 0.016(2) 0.014(2) 0.011(2) -0.0017(17) 0.0038(16) 0.0018(17)
C8 0.008(2) 0.008(2) 0.008(2) 0.0003(10) 0.0013(10) 0.0002(10)
O1W 0.042(4) 0.018(4) 0.007(3) -0.002(3) 0.007(3) 0.012(3)
 
_geom_special_details
;
 All esds (except the esd in the dihedral angle between two l.s. planes)
 are estimated using the full covariance matrix.  The cell esds are taken
 into account individually in the estimation of esds in distances, angles
 and torsion angles; correlations between esds in cell parameters are only
 used when they are defined by crystal symmetry.  An approximate (isotropic)
 treatment of cell esds is used for estimating esds involving l.s. planes.
;
 
loop_
 _geom_bond_atom_site_label_1
 _geom_bond_atom_site_label_2
 _geom_bond_distance
 _geom_bond_site_symmetry_2
 _geom_bond_publ_flag
Zn1 O1 1.935(6) 3_677 ?
Zn1 N2 1.969(7) 3_577 ?
Zn1 N1 1.984(6) . ?
Zn1 O1W 2.019(6) . ?
C1 N2 1.324(10) . ?
C1 C3 1.404(11) . ?
C2 N1 1.367(10) . ?
C2 C7 1.386(11) . ?
C2 C3 1.426(11) . ?
C3 C4 1.409(11) . ?
C4 C5 1.374(11) . ?
C5 C6 1.420(11) . ?
C6 C7 1.365(11) . ?
C6 C8 1.501(11) . ?
N1 N2 1.379(9) . ?
N2 Zn1 1.969(7) 3_577 ?
O1 C8 1.260(9) . ?
O1 Zn1 1.935(6) 3_677 ?
O2 C8 1.260(9) . ?
 
loop_
 _geom_angle_atom_site_label_1
 _geom_angle_atom_site_label_2
 _geom_angle_atom_site_label_3
 _geom_angle
 _geom_angle_site_symmetry_1
 _geom_angle_site_symmetry_3
 _geom_angle_publ_flag
O1 Zn1 N2 128.7(3) 3_677 3_577 ?
O1 Zn1 N1 107.7(2) 3_677 . ?
N2 Zn1 N1 113.1(3) 3_577 . ?
O1 Zn1 O1W 97.3(2) 3_677 . ?
N2 Zn1 O1W 103.8(2) 3_577 . ?
N1 Zn1 O1W 101.1(3) . . ?
N2 C1 C3 110.3(7) . . ?
N1 C2 C7 129.5(7) . . ?
N1 C2 C3 109.3(7) . . ?
C7 C2 C3 121.2(7) . . ?
C1 C3 C4 136.9(8) . . ?
C1 C3 C2 103.8(7) . . ?
C4 C3 C2 119.3(7) . . ?
C5 C4 C3 118.2(8) . . ?
C4 C5 C6 121.8(8) . . ?
C7 C6 C5 120.4(7) . . ?
C7 C6 C8 119.1(7) . . ?
C5 C6 C8 120.6(7) . . ?
C6 C7 C2 119.1(8) . . ?
C2 N1 N2 106.9(6) . . ?
C2 N1 Zn1 126.9(5) . . ?
N2 N1 Zn1 124.7(5) . . ?
C1 N2 N1 109.8(6) . . ?
C1 N2 Zn1 130.6(5) . 3_577 ?
N1 N2 Zn1 119.1(5) . 3_577 ?
C8 O1 Zn1 121.5(5) . 3_677 ?
O2 C8 O1 122.9(7) . . ?
O2 C8 C6 120.5(7) . . ?
O1 C8 C6 116.6(7) . . ?
 
_refine_diff_density_max    0.635
_refine_diff_density_min   -0.656
_refine_diff_density_rms    0.138

_shelxl_version_number 2014-3

_shelx_res_file
;
TITL mo_AGV185_2_0m in P2(1)/n
CELL  0.71073   9.7739   5.7633  14.5924   90.000   95.626   90.000
ZERR     4.00   0.0025   0.0015   0.0036    0.000    0.007    0.000
LATT   1
SYMM  1/2 - X, 1/2 + Y, 1/2 - Z
SFAC  C    H    N    O    ZN
UNIT  32 24 8 12 4
MERG   2
isor 0.001 c1 c2 c3 c5 c6 c7 o2 c8
DFIX     0.900   0.020 O1W H11W
DFIX     0.900   0.020 O1W H12W
DFIX     1.350   0.020 H11W H12W
FMAP   2
PLAN   20
ACTA
BOND
L.S.  20
WGHT    0.031900    6.996900
FVAR       0.16010
ZN1   5    0.161289    1.091008    1.052019    11.00000    0.00950    0.01190 =
         0.00214   -0.00264    0.00164   -0.00037
C1    1    0.030551    0.559204    0.877142    11.00000    0.00823    0.00798 =
         0.00752   -0.00030    0.00052   -0.00002
AFIX  43
H1    2   -0.038565    0.462432    0.850730    11.00000   -1.20000
AFIX   0
C2    1    0.234144    0.718098    0.920781    11.00000    0.00403    0.00379 =
         0.00312    0.00012    0.00012    0.00000
C3    1    0.171652    0.527265    0.870543    11.00000    0.00728    0.00641 =
         0.00630    0.00035    0.00048   -0.00007
C4    1    0.255277    0.366590    0.829274    11.00000    0.02024    0.00473 =
         0.00471   -0.00047   -0.00421   -0.00034
AFIX  43
H4    2    0.217138    0.238405    0.797574    11.00000   -1.20000
AFIX   0
C5    1    0.394723    0.404460    0.837142    11.00000    0.01037    0.01024 =
         0.01037   -0.00015    0.00146    0.00044
AFIX  43
H5    2    0.450932    0.302024    0.808878    11.00000   -1.20000
AFIX   0
C6    1    0.455371    0.595799    0.887269    11.00000    0.00832    0.00858 =
         0.00773   -0.00003    0.00114    0.00031
C7    1    0.375398    0.749070    0.929327    11.00000    0.00676    0.00684 =
         0.00627    0.00004    0.00094   -0.00012
AFIX  43
H7    2    0.415144    0.872576    0.963249    11.00000   -1.20000
AFIX   0
N1    3    0.134348    0.848981    0.955273    11.00000    0.00509    0.01057 =
         0.00942   -0.00123   -0.00219   -0.00067
N2    3    0.009938    0.746804    0.926347    11.00000    0.01221    0.00524 =
         0.00567   -0.00144   -0.00291   -0.00429
O1    4    0.656197    0.781845    0.951983    11.00000    0.01141    0.02140 =
         0.00407   -0.00526    0.00105   -0.00105
O2    4    0.681649    0.521426    0.843428    11.00000    0.01557    0.01400 =
         0.01118   -0.00167    0.00380    0.00183
C8    1    0.608015    0.633009    0.894360    11.00000    0.00849    0.00804 =
         0.00774    0.00029    0.00129    0.00023
O1W   4    0.202445    0.894272    1.165875    11.00000    0.04195    0.01813 =
         0.00746   -0.00194    0.00666    0.01175
AFIX   3
H11W  2    0.173909    0.904603    1.228727    11.00000   -1.20000
H12W  2    0.277248    0.784664    1.156493    11.00000   -1.20000
AFIX   0
HKLF    4

REM  mo_AGV185_2_0m in P2(1)/n
REM R1 =  0.0535 for     817 Fo > 4sig(Fo)  and  0.0777 for all    1035 data
REM    127 parameters refined using     51 restraints

END

WGHT      0.0332      5.7929

REM Highest difference peak  0.635,  deepest hole -0.656,  1-sigma level  0.138
Q1    1  -0.0914  0.7538  0.9562  11.00000  0.05    0.63
Q2    1   0.6349  0.9569  0.8790  11.00000  0.05    0.53
Q3    1   0.6351  0.4187  0.8382  11.00000  0.05    0.52
Q4    1   0.4395  0.2421  0.8479  11.00000  0.05    0.48
Q5    1   0.3163  0.5116  0.8637  11.00000  0.05    0.46
Q6    1   0.7285  0.8520  0.9360  11.00000  0.05    0.46
Q7    1   0.1012  0.5744  0.8728  11.00000  0.05    0.45
Q8    1   0.5982  0.9068  0.9656  11.00000  0.05    0.44
Q9    1  -0.0082  0.4549  0.8847  11.00000  0.05    0.43
Q10   1  -0.1600  0.4439  0.9169  11.00000  0.05    0.43
Q11   1   0.2584  1.0589  1.1594  11.00000  0.05    0.42
Q12   1   0.5328  0.6091  0.8820  11.00000  0.05    0.41
Q13   1  -0.1453  0.5780  0.8562  11.00000  0.05    0.41
Q14   1   0.3069  0.5422  0.7702  11.00000  0.05    0.41
Q15   1   0.4865  0.9600  0.9628  11.00000  0.05    0.39
Q16   1   0.2070  0.5604  0.9435  11.00000  0.05    0.39
Q17   1   0.2214  0.5102  0.8601  11.00000  0.05    0.39
Q18   1   0.7235  0.4116  0.9024  11.00000  0.05    0.38
Q19   1   0.6197  0.5915  0.8227  11.00000  0.05    0.37
Q20   1   0.4230  1.1410  0.9254  11.00000  0.05    0.37
;
_shelx_res_checksum   78671

_shelx_hkl_file
;
   2   0   0  202.59    7.15
  -2   0   0  189.63    7.04
  -3   0   0   -0.85    1.94
   4   0   0  121.67    6.90
  -4   0   0  118.33    6.00
  -4   0   0  110.64    6.89
  -5   0   0   -2.57    3.81
   5   0   0   -0.24    3.32
  -5   0   0    3.37    2.79
  -6   0   0  247.05   10.62
   6   0   0  243.83   11.82
  -6   0   0  267.51   12.06
   6   0   0  268.77   10.80
  -7   0   0    2.52    6.41
   7   0   0    2.98    3.67
  -7   0   0    2.51    3.84
   7   0   0   -1.72    5.22
  -8   0   0   -1.25    7.05
   8   0   0    8.84    4.34
  -8   0   0   -2.35    3.67
   8   0   0    2.31    6.80
   9   0   0    4.33    6.27
   9   0   0    3.67    8.26
  -9   0   0   22.14    6.63
  -9   0   0   -9.87    9.17
 -10   0   0   30.60    6.70
  10   0   0   33.36    8.46
 -10   0   0   62.39   12.62
  10   0   0   51.49   12.77
   0   1   0    0.82    1.38
   0   1   0    0.47    1.26
   0   1   0    1.01    1.73
  -1  -1   0  175.89    5.64
   1  -1   0  162.57    5.73
   1  -1   0  181.84    5.77
  -1  -1   0  170.46    5.75
  -1   1   0  182.34    5.94
  -1   1   0  166.52    5.91
   1   1   0  163.02    5.91
  -1   1   0  174.82    6.63
   1   1   0  171.33    5.90
   2  -1   0    5.49    2.05
   2  -1   0    5.10    2.44
   2  -1   0    6.65    2.26
  -2  -1   0    5.81    2.64
  -2  -1   0    8.13    2.49
   2   1   0    6.43    2.63
  -2   1   0    7.09    2.45
   3  -1   0  378.13   12.48
  -3  -1   0  404.97   12.54
   3  -1   0  418.65   13.78
  -3  -1   0  394.90   13.15
   3   1   0  402.95   13.08
   3   1   0  382.78   12.56
  -3   1   0  396.66   12.72
  -3   1   0  390.94   13.09
   4  -1   0    3.73    3.30
  -4  -1   0    4.47    2.06
   4  -1   0    3.24    2.11
  -4  -1   0    2.26    3.55
  -4   1   0    5.87    2.91
   4   1   0   -0.30    2.00
   4   1   0    1.81    2.96
  -5  -1   0    8.19    4.07
   5  -1   0   13.80    4.90
   5  -1   0   10.45    2.54
  -5  -1   0    6.32    2.57
  -5   1   0   11.37    3.01
   5   1   0   11.32    4.67
   5   1   0   12.71    2.93
   6  -1   0    6.11    4.46
   6  -1   0    5.85    2.50
  -6  -1   0    3.83    2.80
  -6  -1   0    4.06    4.19
  -6   1   0    3.27    4.96
  -6   1   0    3.17    2.79
   6   1   0    1.88    2.59
   6   1   0    4.19    5.18
   7  -1   0   21.54    4.03
   7  -1   0   10.09    5.19
  -7  -1   0   19.25    5.98
  -7  -1   0   31.15    5.24
  -7   1   0   13.20    6.14
  -7   1   0   16.42    4.36
   7   1   0   21.03    6.21
  -8  -1   0   17.93    4.41
   8  -1   0   18.68    5.38
   8  -1   0   32.82    9.25
  -8  -1   0   21.10    8.61
   8   1   0   24.11    6.96
  -8   1   0   15.14    5.56
  -8   1   0   29.10    8.80
  -9  -1   0   44.77   10.30
   9  -1   0   33.61    6.86
   9  -1   0   50.72    9.44
  -9  -1   0   46.67    7.05
   9   1   0   40.39   10.57
  -9   1   0   24.24    6.64
  -9   1   0   28.93    9.06
  10  -1   0   10.80    7.42
  10  -1   0   17.78   11.30
 -10  -1   0   23.77   12.21
 -10  -1   0   18.82    7.85
  10   1   0   25.21   12.47
 -10   1   0   21.38    7.70
 -10   1   0    3.65    9.69
  10   1   0    8.88    7.49
   0   2   0   17.35    2.55
   0   2   0   17.40    2.61
   0   2   0   15.92    3.54
   1  -2   0   13.80    2.17
   1  -2   0   13.97    2.64
  -1   2   0   10.91    2.74
  -1   2   0   13.49    2.64
   1   2   0   12.22    2.73
  -1   2   0   10.57    3.19
   1   2   0   13.57    2.68
  -2  -2   0   14.21    1.82
   2  -2   0   13.43    2.86
   2  -2   0   11.66    1.70
   2  -2   0    8.00    2.43
  -2  -2   0   11.39    2.74
   2   2   0   19.86    3.92
  -2   2   0   16.22    2.42
  -2   2   0   16.36    4.98
   2   2   0   10.00    2.10
  -2   2   0    9.97    3.75
  -3  -2   0    3.04    1.61
   3  -2   0    2.42    2.76
   3  -2   0    3.32    1.62
  -3  -2   0    7.66    3.00
   3  -2   0    4.38    2.33
  -3   2   0    6.04    2.87
   3   2   0    3.34    2.87
  -3   2   0    3.53    1.93
   3   2   0    1.19    1.64
  -4  -2   0   15.08    4.20
   4  -2   0    8.05    2.94
  -4  -2   0    7.65    2.10
   4  -2   0   12.27    2.46
   4  -2   0    9.78    3.42
   4   2   0    9.30    3.83
   4   2   0    8.76    2.55
  -4   2   0   11.32    3.92
  -4   2   0   15.51    3.36
  -5  -2   0   72.11    7.36
   5  -2   0   66.31    6.87
   5  -2   0   72.72    5.87
  -5  -2   0   62.21    4.80
   5  -2   0   66.27    4.85
   5   2   0   71.10    7.34
  -5   2   0   63.87    7.52
   5   2   0   54.34    4.94
  -5   2   0   62.05    5.28
  -6  -2   0   20.74    3.38
  -6  -2   0   35.74    6.88
   6  -2   0   33.63    4.79
   6  -2   0   33.10    6.43
   6  -2   0   26.44    4.38
  -6   2   0   25.26    4.71
   6   2   0   23.24    3.94
   6   2   0   32.26    6.08
  -7  -2   0  134.58    8.24
   7  -2   0  115.07    8.23
   7   2   0  133.87   12.08
  -7   2   0  123.37    8.60
   7   2   0  130.79    9.04
   8  -2   0   26.05    7.79
  -8  -2   0   32.63    5.79
   8  -2   0   35.98    5.27
  -8  -2   0   42.22    9.60
  -8   2   0   24.05    5.17
   8   2   0   38.32   10.11
  -8   2   0   18.47    8.40
   8   2   0   52.56    7.37
  -9  -2   0    2.38    6.10
  -9  -2   0   17.41   11.03
   9  -2   0    3.58   11.15
   9  -2   0    4.77    6.70
   9   2   0   11.14   11.90
  -9   2   0   18.30    6.18
  -9   2   0   21.48    9.57
   0   3   0    1.02    1.62
   0   3   0    0.26    3.98
   0   3   0   -0.49    4.94
   1  -3   0   12.18    2.32
   1   3   0   18.36    2.64
   1   3   0   18.93    3.60
  -1   3   0   18.31    3.49
  -1   3   0   15.39    4.61
  -1   3   0   22.27    2.50
   1   3   0   24.57    4.88
   2  -3   0   42.26    4.53
  -2   3   0   36.24    5.08
  -2   3   0   47.62    6.16
   2   3   0   46.77    5.25
   2   3   0   42.82    3.53
  -2   3   0   48.87    3.65
  -3  -3   0    9.80    3.13
  -3  -3   0    3.42    1.68
   3  -3   0    3.25    3.20
   3  -3   0    7.03    3.03
   3  -3   0    5.55    1.63
   3   3   0    2.51    2.37
  -3   3   0    6.52    3.97
  -3   3   0    3.64    2.38
   3   3   0    2.01    3.86
  -3   3   0    1.88    4.34
  -4  -3   0   45.39    3.97
   4  -3   0   62.40    4.20
  -4  -3   0   59.66    6.61
   4  -3   0   43.80    5.62
   4  -3   0   51.60    6.09
   4   3   0   59.30    6.95
  -4   3   0   56.41    5.20
   4   3   0   58.52    4.84
  -4   3   0   63.87    7.44
  -5  -3   0    4.07    2.62
   5  -3   0    0.39    2.85
   5  -3   0    4.11    4.22
  -5  -3   0   -0.44    5.02
   5  -3   0    6.48    5.02
  -5   3   0    4.62    3.46
  -5   3   0    8.42    9.98
   5   3   0    7.63    5.52
   5   3   0    2.54    3.14
  -6  -3   0   -2.31    3.15
   6  -3   0   -0.85    5.84
   6  -3   0    0.39    3.24
   6  -3   0   -2.09    3.99
  -6  -3   0   -1.33    5.75
  -6   3   0    0.64    6.63
   6   3   0    3.19    6.95
  -6   3   0    6.47    4.02
   6   3   0    5.94    4.12
  -7  -3   0    9.30    8.16
  -7  -3   0    7.40    4.42
   7  -3   0    9.47    4.47
   7  -3   0    6.43    7.28
   7  -3   0    0.01    5.45
  -7   3   0   -0.15    4.49
   7   3   0   25.11    9.22
   7   3   0    1.09    4.79
   8  -3   0  103.15   11.01
   8  -3   0   90.10   12.31
   8  -3   0   98.02    9.51
  -8  -3   0  101.74   12.40
  -8  -3   0   91.96    8.52
  -8   3   0   92.34   10.48
   8   3   0  121.07   11.45
   8   3   0  105.51   14.87
  -9  -3   0   -0.91    6.49
   9  -3   0   -3.00    6.94
   9  -3   0    3.31   11.42
  -9  -3   0   -0.80   11.91
   9   3   0   -0.21   11.99
  -9   3   0    6.96    7.28
   9   3   0   -9.90    8.31
   0   4   0   45.15    5.32
   0   4   0   43.48    6.12
   0   4   0   42.39    4.29
   1   4   0   26.67    4.66
  -1   4   0   29.60    3.56
   1   4   0   33.59    4.16
   1   4   0   28.33    6.64
  -1   4   0   27.42    5.97
  -1   4   0   22.46    4.85
   2  -4   0    6.13    3.24
  -2   4   0   13.59    3.03
  -2   4   0   12.99    5.87
   2   4   0   16.16    3.15
   2   4   0   11.03    5.43
  -2   4   0    5.79    4.75
   2   4   0   14.18    4.95
   3  -4   0    4.94    3.50
  -3   4   0    6.19    6.27
  -3   4   0    3.55    3.61
   3   4   0   11.96    3.63
  -3   4   0    7.03    5.02
   3   4   0   10.57    5.34
   4  -4   0   18.97    5.16
   4   4   0   19.11    8.12
   4   4   0   29.29    4.59
  -4   4   0   19.20    4.39
   5  -4   0   33.19    6.10
  -5  -4   0   41.76    9.55
  -5  -4   0   35.79    4.43
   5  -4   0   29.59    6.41
   5  -4   0   35.26    4.75
   5   4   0   38.69    8.03
   5   4   0   25.29    5.24
  -5   4   0   25.23    5.02
  -5   4   0   30.26    7.65
  -6  -4   0    7.49    6.98
  -6  -4   0    6.98    3.76
   6  -4   0   -1.20    7.12
   6  -4   0    0.99    3.80
   6  -4   0   -1.37    5.72
  -6   4   0    7.16    5.59
  -6   4   0    0.60    7.87
   6   4   0   -8.48    5.14
   6   4   0   -2.49    8.76
  -7  -4   0   29.56    9.78
   7  -4   0   27.69    5.81
   7  -4   0   26.51    7.61
   7  -4   0    7.97    9.54
  -7   4   0   26.33    7.55
   7   4   0   43.60    8.07
   7   4   0   30.86    9.72
  -7   4   0   50.43   11.63
   0   5   0    2.85    3.72
   0   5   0    1.43    7.93
   0   5   0    4.14    6.06
  -1   5   0   44.30    6.05
  -1   5   0   81.65   11.96
  -1   5   0   50.69    7.39
   1   5   0   60.40    7.92
   1   5   0   59.70    6.56
   1   5   0   50.69    9.58
   2   5   0   11.35    6.98
   2   5   0   14.61    8.43
  -2   5   0    9.36    4.00
   2   5   0   14.29    4.50
  -2   5   0   -1.55    7.79
  -2   5   0    9.15    8.03
   3  -5   0  106.49   10.59
  -3   5   0  101.53   11.41
  -3   5   0   94.49   11.61
   3   5   0  111.33   14.89
   3   5   0  116.79    8.40
  -3   5   0   90.17    7.86
   3   5   0   99.66   10.65
   4  -5   0    1.33    6.71
  -4   5   0   -2.96   10.74
  -4   5   0   -0.68    5.04
  -4   5   0    2.62    8.33
   4   5   0    7.17    7.95
   5  -5   0    6.78    6.45
  -5   5   0   -2.58    9.99
  -5   5   0   16.55    5.98
   5   5   0   10.36    9.50
   5   5   0    7.81    6.56
   6  -5   0    5.06    9.80
   0   6   0  116.55    9.25
   0   6   0  116.01   15.77
   0   6   0   80.78   10.91
   1   6   0   18.68    9.11
   1   6   0    3.91    6.33
  -1   6   0   10.07    5.71
  -1   6   0   23.16    9.33
   1   6   0    2.69   10.95
  -1   6   0   22.77   11.61
   2   6   0   -3.50   11.33
  -2   6   0    9.94    6.46
   2   6   0   -3.84    9.29
  -2   6   0   -3.01    9.39
  -2   6   0   -1.53   11.16
   2   6   0  -16.79    6.59
 -10   0   1   -1.78    6.89
  10   0  -1   -1.24   11.07
 -10   0   1   14.39   12.78
  10   0  -1  -11.46    7.67
  -9   0   1   84.71    9.23
   9   0  -1   72.87    9.94
  -9   0   1   90.30   11.08
   9   0  -1   87.13   10.54
   8   0  -1    3.05    5.92
  -8   0   1   -5.00    3.43
   8   0  -1    2.97    3.97
  -8   0   1  -10.39    7.02
  -7   0   1  144.92   11.12
   7   0  -1  151.11    8.86
  -6   0   1    0.00    4.78
  -6   0   1   -0.54    2.36
   6   0  -1   -2.27    3.76
   6   0  -1   -1.99    2.85
  -5   0   1    2.02    2.31
  -5   0   1    1.41    3.73
   5   0  -1    4.02    4.06
   5   0  -1    5.39    2.87
   4   0  -1   -2.57    2.99
  -4   0   1   -0.49    1.86
   4   0  -1   -1.08    1.99
  -4   0   1    0.50    3.23
   3   0  -1  173.39    6.89
  -3   0   1  183.20    8.13
  -3   0   1  173.64    6.81
   2   0  -1   -0.80    2.04
   1   0  -1  131.33    5.58
  -1   0   1  135.29    4.91
  -1   0  -1   17.07    2.34
   1   0   1   20.25    1.96
   1   0   1   18.73    2.33
  -1   0  -1   20.83    2.25
  -2   0  -1   -0.08    2.27
  -2   0  -1   -0.61    2.49
   2   0   1   -0.80    1.96
   2   0   1    0.41    1.79
   3   0   1   34.35    3.28
  -3   0  -1   38.17    5.11
  -3   0  -1   46.29    3.63
  -4   0  -1   -0.18    2.07
  -4   0  -1   -1.33    2.79
   4   0   1    0.11    2.90
  -5   0  -1  379.49   13.39
  -5   0  -1  362.53   13.86
   6   0   1    0.83    4.70
  -6   0  -1    0.56    2.51
  -6   0  -1    1.26    4.57
   7   0   1    7.09    3.92
  -7   0  -1    5.18    5.48
  -7   0  -1    2.31    3.52
   7   0   1   14.79    7.06
   8   0   1    3.67    5.16
  -8   0  -1   -3.96    6.96
  -8   0  -1   -0.24    4.33
   8   0   1   -0.04    7.74
   9   0   1   21.69    7.23
   9   0   1   12.39    8.86
  -9   0  -1   21.43    9.69
  -9   0  -1   19.61    6.54
 -10   0  -1  -11.35   11.21
 -10   0  -1    0.38    8.00
  10   0   1    1.31    9.84
  10   0   1  -17.89    6.76
 -10  -1   1   24.06    6.86
 -10  -1   1   56.78   13.98
  10  -1  -1   38.98   10.91
  10  -1  -1   48.59    9.51
 -10   1   1   40.92   11.68
  10   1  -1   50.29    9.67
 -10   1   1   38.00    8.39
  -9  -1   1   -4.00    5.21
   9  -1  -1   -5.31    5.95
  -9  -1   1  -18.45    8.86
   9  -1  -1  -12.40    7.70
   9   1  -1   14.60    7.29
   9   1  -1   -7.57   10.10
  -9   1   1   12.76    6.47
  -9   1   1    9.19    8.26
   8  -1  -1    0.05    3.85
  -8  -1   1    6.04    4.93
  -8  -1   1    6.28    6.71
   8  -1  -1    6.40    7.13
   8   1  -1   -4.31    7.01
  -8   1   1    9.76    5.23
  -8   1   1    8.53    7.23
   7  -1  -1    6.30    3.21
   7  -1  -1    1.69    5.27
  -7  -1   1    2.10    3.50
  -7   1   1    5.47    5.44
  -7   1   1    1.53    3.45
   7   1  -1   10.85    6.32
  -6  -1   1  122.57    6.93
   6  -1  -1  123.13    7.04
  -6  -1   1  136.92    9.34
   6  -1  -1  127.57    9.16
   6   1  -1  124.35    9.39
  -6   1   1  129.93    7.22
  -5  -1   1  103.69    7.43
  -5  -1   1   91.02    5.47
   5  -1  -1   93.96    7.69
   5  -1  -1   95.97    5.65
   5   1  -1   98.90    5.79
  -5   1   1  101.71    5.95
   5   1  -1   88.93    7.41
   4  -1  -1  318.91   11.42
   4  -1  -1  347.10   12.29
  -4  -1   1  332.54   11.83
  -4  -1   1  326.08   11.13
  -4   1   1  338.18   12.31
   4   1  -1  338.20   12.14
   4   1  -1  326.71   11.42
  -4   1   1  317.50   11.49
  -3  -1   1    0.87    2.36
  -3  -1   1    3.53    1.75
   3  -1  -1   -0.53    1.68
   3  -1  -1    1.96    3.28
  -3   1   1    2.50    2.63
   3   1  -1    2.78    3.96
  -3   1   1    0.74    1.79
   3   1  -1   -1.75    1.59
  -2  -1   1    0.28    2.15
   2  -1  -1   -0.37    2.53
   2  -1  -1    1.52    1.59
  -2  -1   1    1.09    2.22
   2  -1  -1    0.46    2.04
   2   1  -1    1.07    2.23
  -2   1   1    1.38    2.47
  -2   1   1   -2.08    1.64
   2   1  -1   -2.79    2.23
   1  -1  -1   10.46    2.23
   1  -1  -1    7.96    2.23
   1  -1  -1    9.91    2.39
   1   1  -1    8.35    1.57
  -1   1   1    9.48    2.25
  -1   1   1    9.84    2.45
   1   1  -1   12.82    1.74
  -1   1   1    9.37    2.23
   0  -1  -1   32.04    2.89
   0  -1   1   27.38    3.11
   0  -1  -1   29.26    2.91
   0   1   1   29.62    3.11
   0   1   1   26.90    3.12
   0   1  -1   29.44    3.26
   0   1   1   30.35    3.12
  -1  -1  -1   39.73    3.49
  -1  -1  -1   39.37    3.65
  -1   1  -1   42.19    2.69
  -1   1  -1   38.25    2.78
   1   1   1   36.13    3.74
  -1   1  -1   38.06    4.02
   1   1   1   39.62    3.85
  -2  -1  -1  258.89    8.67
  -2  -1  -1  248.44    9.06
   2  -1   1  264.52    8.49
   2  -1   1  252.28    8.95
   2   1   1  254.11    8.73
   2   1   1  265.29    9.12
  -2   1  -1  247.24    8.67
  -3  -1  -1   -0.01    2.96
   3  -1   1    3.46    2.71
   3  -1   1    2.99    1.79
  -3  -1  -1    5.80    2.44
  -3   1  -1    7.31    2.21
   3   1   1    5.81    2.09
   3   1   1    3.22    3.14
   4  -1   1   -1.18    1.82
  -4  -1  -1   -2.05    3.28
   4  -1   1   -3.77    3.20
  -4  -1  -1    2.07    2.09
   4   1   1   -1.69    2.81
  -4   1  -1   -0.06    2.54
   4   1   1   -1.78    1.90
   5  -1   1   65.80    4.62
  -5  -1  -1   56.10    4.89
  -5  -1  -1   62.15    6.97
   5  -1   1   67.21    6.35
  -5   1  -1   65.42    6.88
  -5   1  -1   57.97    4.98
   5   1   1   64.80    5.05
   5   1   1   52.15    6.51
   6  -1   1   40.99    5.92
  -6  -1  -1   51.94    5.55
   6  -1   1   57.51    4.95
  -6  -1  -1   62.78    8.25
   6   1   1   41.53    6.70
   6   1   1   46.15    5.50
  -6   1  -1   53.19    5.58
  -6   1  -1   50.16    7.19
  -7  -1  -1   42.40    6.96
   7  -1   1   27.05    6.14
   7  -1   1   35.62    5.16
  -7  -1  -1   26.06    4.58
   7   1   1   38.86    8.01
   7   1   1   37.64    6.25
  -7   1  -1   35.53    7.65
  -7   1  -1   20.67    4.22
  -8  -1  -1    9.73    4.29
   8  -1   1    8.17    6.97
   8  -1   1    3.30    4.07
  -8  -1  -1   15.24    7.58
   8   1   1   24.52    7.94
  -8   1  -1   20.27    6.34
  -8   1  -1   19.62    8.12
   9  -1   1   -9.76    9.39
   9  -1   1   -4.45    5.31
  -9  -1  -1    2.80    9.56
  -9  -1  -1    2.55    5.43
  -9   1  -1    7.56   10.17
  -9   1  -1    2.00    5.50
   9   1   1   -9.43    8.72
  10  -1   1    7.34    7.23
  10  -1   1    3.50   12.97
 -10  -1  -1    7.62   12.79
 -10  -1  -1    3.06    6.89
  10   1   1   10.38   11.37
 -10   1  -1   -7.55    6.93
  10   1   1   34.26   10.63
 -10   1  -1   22.75   11.93
  -9  -2   1   37.28   12.47
  -9  -2   1   11.31    5.87
   9  -2  -1   10.66    6.14
   9  -2  -1   31.04   11.35
  -9   2   1   25.19    7.64
   9   2  -1   23.15    9.70
  -9   2   1   26.68   10.93
  -8  -2   1   19.15    4.38
  -8  -2   1   22.80    9.10
   8  -2  -1   14.87    4.68
   8  -2  -1    8.99    8.78
   8   2  -1   12.58    9.65
  -8   2   1    8.78    4.82
   7  -2  -1   16.47    7.25
   7  -2  -1   20.96    4.42
  -7  -2   1   29.41    7.61
   7   2  -1   13.74    6.84
   7   2  -1   25.50    5.60
  -7   2   1   22.08    5.49
  -6  -2   1   11.15    5.11
   6  -2  -1   10.11    3.39
   6  -2  -1    8.61    4.83
   6  -2  -1   11.52    4.08
   6   2  -1   10.24    3.28
  -6   2   1   15.15    4.24
  -6   2   1   12.83    6.00
   5  -2  -1    5.17    4.74
  -5  -2   1   -3.54    3.62
   5  -2  -1    2.39    2.46
  -5  -2   1    7.11    2.30
   5  -2  -1    1.59    2.53
  -5   2   1    1.05    2.42
   5   2  -1    4.19    4.18
  -5   2   1    0.08    3.98
   5   2  -1    4.73    2.51
   4  -2  -1   19.00    4.41
  -4  -2   1   12.83    2.13
   4  -2  -1    9.55    2.25
  -4  -2   1   18.04    4.06
   4  -2  -1   13.56    2.89
  -4   2   1   11.39    4.14
   4   2  -1   13.35    4.26
  -4   2   1    8.36    2.40
   4   2  -1   12.87    2.56
   3  -2  -1  145.51    6.23
   3  -2  -1  146.92    6.93
  -3  -2   1  144.62    6.51
   3  -2  -1  147.97    7.16
  -3  -2   1  153.06    5.44
   3   2  -1  142.93    6.98
  -3   2   1  142.32    7.44
  -3   2   1  153.36    6.79
   3   2  -1  144.31    5.84
   2  -2  -1  147.34    6.51
   2  -2  -1  145.32    6.78
   2  -2  -1  155.19    5.89
  -2   2   1  151.88    7.74
  -2   2   1  149.72    6.23
   2   2  -1  148.41    6.26
  -2   2   1  145.27    6.95
   1  -2  -1   69.25    4.49
   1  -2  -1   73.36    4.68
   1  -2  -1   71.76    3.65
  -1   2   1   68.49    4.88
   1   2  -1   69.06    3.62
   1   2  -1   73.58    3.73
  -1   2   1   68.65    3.78
  -1   2   1   69.78    5.75
   0  -2  -1    0.30    2.04
   0   2   1    1.39    2.06
   0   2  -1    1.69    3.11
   0   2   1    1.90    3.13
   0   2   1    3.40    2.62
   1  -2   1    4.22    2.30
  -1  -2  -1    0.70    2.38
  -1  -2  -1    1.56    1.48
   1   2   1    4.56    2.70
  -1   2  -1    2.31    1.96
  -1   2  -1    2.04    2.79
   1   2   1    0.27    1.47
  -1   2  -1    0.94    1.93
  -2  -2  -1   66.25    5.09
  -2  -2  -1   72.16    3.68
   2  -2   1   59.61    3.72
   2  -2   1   65.97    4.54
   2   2   1   71.29    5.22
  -2   2  -1   68.24    4.23
  -2   2  -1   83.03    6.36
   2   2   1   65.42    4.20
  -2   2  -1   67.82    4.66
   3  -2   1   53.44    4.38
  -3  -2  -1   53.95    3.62
   3  -2   1   45.08    4.54
   3  -2   1   57.39    3.17
  -3  -2  -1   47.42    5.57
  -3   2  -1   56.82    3.83
   3   2   1   54.88    4.27
  -3   2  -1   54.99    5.25
   3   2   1   47.13    5.71
  -4  -2  -1  121.87    7.67
   4  -2   1  113.98    6.82
   4  -2   1  107.62    6.55
  -4  -2  -1  101.42    5.73
   4  -2   1  120.19    5.41
   4   2   1  111.76    7.75
  -4   2  -1  112.87    5.98
  -4   2  -1  116.14    7.46
   4   2   1  113.61    6.11
  -5  -2  -1   -0.50    4.24
  -5  -2  -1   -0.31    2.56
   5  -2   1    0.96    2.80
   5  -2   1   -1.71    4.09
   5  -2   1    2.80    2.10
   5   2   1   -0.30    2.86
   5   2   1    5.50    4.89
  -5   2  -1   -1.17    2.39
  -6  -2  -1   -4.44    5.05
   6  -2   1    2.04    2.67
   6  -2   1   -4.46    4.86
  -6  -2  -1   -1.11    3.20
   6  -2   1    3.54    3.28
   6   2   1    5.73    5.07
   6   2   1   -1.27    3.02
  -6   2  -1   -1.68    3.09
  -7  -2  -1   12.75    7.53
  -7  -2  -1    8.67    3.98
  -7   2  -1   13.62    6.88
   7   2   1   21.22    4.76
  -7   2  -1   11.34    4.21
   7   2   1   11.72    6.64
   8  -2   1   71.84    7.47
  -8  -2  -1   52.73    9.83
  -8  -2  -1   39.60    6.43
   8  -2   1   47.38   10.53
   8   2   1   67.36   11.76
  -8   2  -1   66.11    8.54
  -8   2  -1   51.74    9.77
   8   2   1   53.63    6.63
  -9  -2  -1   20.12    7.03
   9  -2   1   27.21   10.77
  -9  -2  -1   16.59   10.52
   9  -2   1   26.02    7.49
  -9   2  -1   25.75    9.83
   9   2   1   40.49   12.49
  -9   2  -1   32.92    8.05
  -9  -3   1   18.37    6.49
   9  -3  -1   26.63   12.12
   9  -3  -1   17.20    7.88
   9  -3  -1   24.35    7.42
  -9  -3   1    7.83   12.55
  -9   3   1   23.31    9.58
   9   3  -1   28.16   10.55
   9   3  -1   20.01    8.06
   8  -3  -1    5.21    5.95
  -8  -3   1   13.73    4.70
   8  -3  -1   11.32    6.36
  -8  -3   1   10.25   10.33
   8  -3  -1    7.88    9.53
  -8   3   1    8.93    6.12
   8   3  -1   19.74    6.55
   8   3  -1   20.45    9.48
  -7  -3   1    8.69    7.43
   7  -3  -1    1.01    4.66
  -7  -3   1    5.80    3.77
   7  -3  -1   -1.38    8.43
   7  -3  -1    2.78    4.47
  -7   3   1   11.28    4.82
   7   3  -1   -8.68    8.29
   7   3  -1    4.99    5.10
  -7   3   1    2.66    7.43
   6  -3  -1   22.62    5.70
   6  -3  -1   24.23    4.34
  -6  -3   1   27.40    6.47
   6  -3  -1   25.81    6.82
  -6  -3   1   23.93    3.40
   6   3  -1   26.63    5.25
   6   3  -1   29.98    6.76
  -6   3   1   39.53    5.96
  -6   3   1   16.68    7.52
  -5  -3   1   51.43    7.06
   5  -3  -1   59.66    7.31
   5  -3  -1   39.55    5.29
   5  -3  -1   58.48    5.07
  -5  -3   1   56.84    4.16
  -5   3   1   53.34    5.87
   5   3  -1   49.19    5.45
   5   3  -1   44.49    6.35
   4  -3  -1    3.48    2.26
  -4  -3   1    7.05    1.71
   4  -3  -1    3.10    2.68
   4  -3  -1    9.98    4.44
  -4  -3   1    2.87    3.29
   4   3  -1    6.41    2.52
  -4   3   1    8.11    2.69
   4   3  -1    5.79    3.88
  -4   3   1    5.45    4.94
   3  -3  -1   19.15    2.60
   3  -3  -1   21.43    3.35
  -3   3   1   28.26    4.71
  -3   3   1   18.49    3.06
  -3   3   1   28.73    5.71
   3   3  -1   21.56    2.90
   3   3  -1   24.48    4.12
   2  -3  -1   16.21    3.51
   2  -3  -1   17.95    3.60
   2  -3  -1   11.98    2.04
  -2   3   1   17.35    4.13
   2   3  -1   16.80    3.42
   2   3  -1   14.35    2.15
  -2   3   1   13.37    2.58
  -2   3   1   11.65    4.30
   1  -3  -1   66.09    3.35
   1  -3  -1   65.20    5.04
   1  -3  -1   62.07    4.54
  -1   3   1   71.59    7.04
   1   3  -1   73.43    7.29
   1   3  -1   63.71    4.75
  -1   3   1   69.24    3.97
  -1   3   1   61.97    5.58
   0  -3  -1   35.53    3.89
   0   3  -1   30.42    3.89
   0   3   1   32.50    4.38
   0   3  -1   45.53    6.24
   0   3  -1   27.06    3.72
   0   3   1   32.34    3.05
   0   3   1   26.57    4.36
  -1  -3  -1  132.89    6.11
  -1  -3  -1  147.93    5.26
   1  -3   1  143.10    7.24
   1   3   1  137.23    5.99
   1   3   1  157.58    8.95
   1   3   1  150.60    7.27
  -1   3  -1  150.08    9.10
  -1   3  -1  134.64    6.36
  -2  -3  -1    3.40    3.10
   2  -3   1    2.84    2.18
  -2  -3  -1    2.72    1.55
   2   3   1   -2.19    3.34
  -2   3  -1   -0.80    2.87
  -2   3  -1   -2.65    4.22
   2   3   1   -3.03    2.09
  -2   3  -1    2.06    1.74
   3  -3   1   20.44    3.63
  -3  -3  -1   16.67    6.51
  -3  -3  -1   12.90    2.54
  -3   3  -1   14.27    5.33
   3   3   1   15.92    2.84
  -3   3  -1   12.43    2.59
   3   3   1   22.42    4.72
  -3   3  -1   13.55    3.71
  -4  -3  -1   25.51    5.28
   4  -3   1   30.12    4.71
   4  -3   1   33.88    5.02
  -4  -3  -1   27.61    3.26
   4  -3   1   26.08    3.24
   4   3   1   34.26    6.23
  -4   3  -1   33.03    4.26
   4   3   1   36.01    4.74
  -4   3  -1   21.80    4.86
   5  -3   1  105.52    7.76
   5  -3   1   74.81    7.72
  -5  -3  -1   99.92    6.22
  -5  -3  -1  116.01    9.59
   5  -3   1  104.97    5.79
  -5   3  -1   96.05    9.13
  -5   3  -1  105.01    6.90
   5   3   1   96.70    6.90
   5   3   1   95.29   10.92
   6  -3   1   27.68    4.27
   6  -3   1   42.75    6.92
  -6  -3  -1   35.62    5.19
   6  -3   1   32.69    5.27
  -6  -3  -1   43.52    7.98
   6   3   1   27.85    7.18
  -6   3  -1   44.49    6.20
   6   3   1   35.23    5.25
  -6   3  -1   30.65    6.52
  -7  -3  -1   33.42    5.69
   7  -3   1   41.45    7.00
   7  -3   1   43.94    8.88
  -7  -3  -1   21.97   10.16
   7  -3   1   23.53    4.87
   7   3   1   41.03    6.20
  -7   3  -1   24.50    5.46
   7   3   1   31.53    9.39
   8  -3   1   -9.33    9.31
   8  -3   1   11.16    7.05
   8  -3   1   14.69    5.53
  -8  -3  -1   -3.56    9.75
  -8  -3  -1    3.94    5.43
   8   3   1    6.22    6.24
  -8   3  -1    1.96    5.95
   8   3   1   -2.32   10.20
   7  -4  -1   24.08   10.33
  -7  -4   1   24.44    5.00
   7  -4  -1   61.20    9.73
  -7  -4   1   38.06    9.09
   7  -4  -1   37.47    6.22
  -7   4   1   24.08   10.70
   7   4  -1   50.52    8.02
   7   4  -1   43.87   11.17
  -7   4   1   29.71    6.79
   6  -4  -1   10.57    6.17
   6  -4  -1    6.47    7.65
  -6  -4   1    4.40    3.32
   6  -4  -1    0.14    4.45
  -6  -4   1    4.58    6.83
   6   4  -1    8.97    8.74
  -6   4   1    3.41    5.19
  -6   4   1   11.76    7.79
   6   4  -1    5.40    5.38
   5  -4  -1    1.78    6.27
   5  -4  -1    1.07    4.54
   5  -4  -1   11.46    3.44
  -5   4   1   -2.79    6.76
  -5   4   1    3.78    4.63
   5   4  -1    4.55    4.05
   5   4  -1   -4.30    6.38
   4  -4  -1   26.83    5.96
   4  -4  -1   20.61    4.86
   4  -4  -1   14.89    2.81
   4   4  -1   11.31    5.79
  -4   4   1   25.75    4.90
  -4   4   1   21.27    7.09
  -4   4   1   21.40    8.57
   3  -4  -1  112.81    7.50
   3  -4  -1  115.91    8.15
  -3   4   1  103.90   10.92
  -3   4   1  102.13    9.42
   3   4  -1  112.02    8.41
  -3   4   1  115.61    6.87
   3   4  -1  106.93    6.55
   2  -4  -1  108.46    7.47
  -2   4   1  100.84    6.27
   2   4  -1  105.74   10.65
   2   4  -1   82.74    7.32
   2   4  -1   96.70    5.58
  -2   4   1   88.91    8.56
  -2   4   1  120.57   10.92
  -1   4   1   16.41    3.21
   1   4  -1   26.65    6.07
   1   4  -1   19.52    2.40
   1   4  -1   19.19    4.47
  -1   4   1   21.69    5.80
  -1   4   1   17.56    4.99
   0   4   1    2.82    5.62
   0   4  -1   -0.92    3.67
   0   4   1    2.59    4.26
   0   4   1    3.13    2.42
   0   4  -1    0.37    2.19
   0   4  -1   -2.76    5.83
  -1   4  -1   -2.69    2.10
  -1   4  -1    2.28    5.45
   1   4   1    0.38    4.29
  -1   4  -1   -4.51    3.76
   1   4   1   -0.23    2.66
   1   4   1   -0.21    5.18
   2  -4   1   69.74    6.67
  -2   4  -1   74.67    4.96
  -2   4  -1   69.14    6.95
   2   4   1   81.00    8.13
   2   4   1   74.62    5.78
  -2   4  -1   73.02   10.22
   3  -4   1  114.76    8.21
  -3   4  -1  126.71   12.32
  -3   4  -1  115.70    8.78
  -3   4  -1  113.57    6.85
   3   4   1  116.45    9.37
   3   4   1  122.09    7.30
  -4  -4  -1   66.07    4.87
  -4  -4  -1   81.52    9.49
   4  -4   1   65.29    7.44
  -4   4  -1   82.85    9.35
  -4   4  -1   68.72    6.18
   4   4   1   64.07    7.11
   4   4   1   76.75   10.07
  -5  -4  -1   20.17    6.62
   5  -4   1   13.14    4.72
  -5  -4  -1   15.95    3.53
   5   4   1   20.04    4.97
   5   4   1   14.49    7.40
  -5   4  -1   19.27    5.07
  -5   4  -1   21.28    7.36
  -6  -4  -1    3.96    7.71
   6  -4   1    2.39    3.59
  -6  -4  -1    1.71    4.02
   6  -4   1    3.20    5.21
   6  -4   1    7.72    6.63
   6   4   1    0.83    9.42
   6   4   1    1.46    5.52
  -6   4  -1    0.84    5.42
  -6   4  -1   -6.79    8.52
   7  -4   1    6.73    8.99
  -7  -4  -1   12.58    5.11
   7  -4   1   28.69    5.21
  -7  -4  -1    1.54   10.83
   7  -4   1   11.57    6.18
   7   4   1   13.08   10.18
   7   4   1   10.50    6.73
  -7   4  -1    7.41    6.43
  -7   4  -1   18.33   10.40
   6  -5  -1   24.60    8.35
   6  -5  -1   25.05    9.51
  -6   5   1   36.40    7.51
  -6   5   1   20.14   12.32
   6   5  -1   64.92   12.78
   6   5  -1   48.34    8.14
   5  -5  -1   32.86    7.76
  -5   5   1   24.87   10.50
   5   5  -1   23.91    6.54
   5   5  -1    5.71    9.46
  -5   5   1   26.14    6.62
   4  -5  -1   29.82    6.54
  -4   5   1   24.33    8.00
  -4   5   1   26.91    5.90
   4   5  -1   31.24    8.47
  -4   5   1   27.50   10.82
   4   5  -1   23.29    5.46
   3  -5  -1   -1.59    4.93
   3   5  -1    1.70    4.48
  -3   5   1   -3.36    4.60
  -3   5   1    2.03    8.33
   3   5  -1    5.69    9.00
  -3   5   1   17.53    7.67
   2   5  -1   14.39    9.39
   2   5  -1   19.29    4.14
  -2   5   1   19.93    4.38
   2   5  -1   15.54    6.27
  -2   5   1   22.18    8.97
  -2   5   1    5.58    6.90
   1   5  -1    6.79    3.70
   1   5  -1    6.84    5.87
  -1   5   1   -7.52    8.04
   1   5  -1  -15.73    8.29
   0   5  -1   60.42   10.56
   0   5   1   61.58    6.44
   0   5   1   54.65    9.63
   0   5  -1   52.60    5.53
   0   5   1   54.35    9.99
   0   5  -1   67.53    8.78
  -1   5  -1   13.88    3.40
   1   5   1    2.31    9.27
  -1   5  -1    7.38    8.06
  -1   5  -1   12.49    5.99
   1   5   1    4.99    4.13
  -2   5  -1   51.79    5.91
  -2   5  -1   56.22   10.84
  -2   5  -1   41.82    7.27
   2   5   1   55.79    6.14
   2   5   1   65.32   10.14
   2   5   1   67.94    8.87
   3  -5   1   -2.58    5.84
   3   5   1    4.45    5.14
   3   5   1   13.05    9.40
  -3   5  -1   11.95   10.13
  -3   5  -1    4.18    4.25
   3   5   1    6.83    7.34
   4  -5   1    5.67    6.49
  -4   5  -1   -3.25    7.81
   4   5   1    1.12    7.82
   4   5   1   -3.25    5.78
  -4   5  -1    0.84    4.82
  -4   5  -1   16.57   11.03
   5  -5   1   16.17    7.00
  -5   5  -1   17.77    9.25
   5   5   1    0.83    9.01
   5   5   1   12.40    6.60
  -5   5  -1    7.18    5.89
   2   6  -1   -7.55   11.97
   2   6  -1   18.44    8.76
  -2   6   1   -2.59   11.74
   2   6  -1   13.11    6.71
  -2   6   1    3.39    6.31
  -2   6   1    3.42    9.88
  -1   6   1   12.13    6.51
   1   6  -1   32.30    6.36
  -1   6   1   22.75   10.02
   1   6  -1   30.78   12.50
  -1   6   1   20.77   11.27
   1   6  -1   21.42    8.11
   0   6  -1    0.05   10.97
   0   6  -1    4.10    7.87
   0   6   1   15.86    6.54
   0   6   1   11.84    9.49
   0   6   1    6.33   11.44
   0   6  -1   16.28    5.44
  -1   6  -1   37.82   12.63
  -1   6  -1   35.31    8.87
   1   6   1   17.45    9.73
   1   6   1   17.19   10.87
   2   6   1  -14.34   13.25
  -2   6  -1   21.56   12.72
 -10   0   2   86.67   10.69
 -10   0   2   71.93   13.20
  10   0  -2   95.34   11.63
  10   0  -2   48.38   10.61
   9   0  -2    1.33    8.22
  -9   0   2    0.07    9.46
   9   0  -2    4.56    5.15
  -9   0   2   -0.52    5.05
   8   0  -2    5.27    7.49
  -8   0   2   26.25    8.29
   8   0  -2   11.35    4.55
  -8   0   2   20.43    4.76
  -7   0   2    3.39    3.25
   7   0  -2    1.23    3.24
   7   0  -2    1.25    6.46
  -7   0   2   -1.22    5.96
  -6   0   2  110.67    6.55
  -6   0   2  118.17    9.15
   6   0  -2  105.89    8.93
   6   0  -2  110.09    6.80
   5   0  -2    0.76    2.29
  -5   0   2   -2.72    2.00
   5   0  -2    0.47    3.78
  -5   0   2    0.33    3.44
  -4   0   2  176.86    7.39
   4   0  -2  193.83    8.52
   4   0  -2  172.42    7.60
  -3   0   2    0.91    1.59
   3   0  -2    1.20    1.70
   3   0  -2   -0.99    3.28
   2   0  -2   11.85    2.69
  -2   0   2    9.23    2.06
   2   0  -2    7.09    2.66
  -2   0   2   11.27    2.96
   1   0  -2    0.42    1.58
  -1   0   2   -0.42    1.54
   1   0  -2   -1.41    1.52
  -1   0   2   -0.55    1.54
   0   0  -2  481.17   13.32
   0   0   2  475.95   13.28
   0   0  -2  464.75   13.28
   0   0   2  476.82   13.21
   1   0   2    0.19    1.98
  -1   0  -2   -0.88    1.79
   1   0   2   -0.86    1.62
  -1   0  -2   -2.54    1.87
  -2   0  -2   33.69    4.14
  -2   0  -2   35.03    3.50
   2   0   2   32.13    4.09
   2   0   2   32.83    3.19
   3   0   2   -4.21    2.74
  -3   0  -2   -1.46    2.15
   3   0   2    0.77    1.91
  -3   0  -2    1.21    3.09
   4   0   2   86.17    5.05
  -4   0  -2   89.79    6.47
   4   0   2   99.69    6.64
  -4   0  -2   88.70    5.50
   5   0   2   -7.03    3.47
  -5   0  -2   -0.51    2.26
  -5   0  -2    3.53    4.11
  -6   0  -2  175.73   10.56
   6   0   2  166.25   10.43
  -7   0  -2    4.27    5.53
   7   0   2   -0.87    6.50
  -7   0  -2    1.55    4.01
  -8   0  -2    7.09    4.28
  -8   0  -2    2.95    7.22
   8   0   2   18.36    4.75
   8   0   2   -4.14    6.27
   9   0   2    5.98    5.94
  -9   0  -2   10.17   10.29
   9   0   2    9.05    8.71
  -9   0  -2    1.55    5.39
 -10   0  -2    1.10   11.64
 -10   0  -2   14.21    8.09
  10   0   2    7.89   10.80
  10   0   2   10.06    8.39
 -10  -1   2   13.79   13.25
  10  -1  -2   17.73    7.68
  10  -1  -2    5.70   12.24
 -10  -1   2   -4.28    6.12
  10   1  -2    7.64   11.61
 -10   1   2    7.92    6.83
  10   1  -2   15.52    7.27
 -10   1   2    4.37    9.50
  -9  -1   2    4.50    4.99
   9  -1  -2   12.56    5.41
   9  -1  -2   14.07    9.35
  -9  -1   2   16.67   10.18
  -9   1   2    8.35   10.63
  -9   1   2   19.86    6.31
   9   1  -2   -4.70    9.79
   9   1  -2   16.40    6.62
  -8  -1   2   -3.47    7.45
  -8  -1   2    0.82    3.58
   8  -1  -2    5.44    4.19
   8  -1  -2   -0.09    6.58
   8   1  -2   -9.69    4.75
  -8   1   2   -7.51    3.94
   8   1  -2   -4.35    7.68
  -8   1   2    2.81    6.32
  -7  -1   2  127.08   12.11
   7  -1  -2  138.67    8.40
   7  -1  -2  133.05   11.05
  -7  -1   2  123.12    7.51
  -7   1   2  130.86    8.40
   7   1  -2  118.11   10.96
   6  -1  -2   64.08    8.17
   6  -1  -2   32.61    4.60
  -6  -1   2   65.14    7.07
  -6  -1   2   43.03    4.38
   6   1  -2   49.00    7.37
  -6   1   2   40.63    5.07
  -5  -1   2    4.36    3.81
   5  -1  -2   -0.49    4.17
   5  -1  -2    3.70    2.75
  -5  -1   2    1.10    2.06
  -5   1   2    7.54    3.69
  -5   1   2   -2.21    2.11
   5   1  -2    6.29    4.07
  -4  -1   2    6.28    2.08
  -4  -1   2    9.18    3.43
   4  -1  -2    5.79    2.13
   4  -1  -2    4.68    3.60
  -4   1   2    7.40    2.85
   4   1  -2    8.09    4.14
  -4   1   2    7.12    3.02
   3  -1  -2   55.52    4.14
   3  -1  -2   57.78    5.20
  -3  -1   2   54.49    4.57
  -3  -1   2   61.62    3.48
  -3   1   2   57.98    5.36
   3   1  -2   50.99    3.73
  -3   1   2   62.57    4.52
  -2  -1   2    2.81    1.80
   2  -1  -2    3.45    1.96
   2  -1  -2    0.92    2.09
  -2  -1   2    1.01    1.83
   2  -1  -2    6.85    2.88
   2   1  -2   -0.19    2.18
   2   1  -2    1.32    2.18
  -2   1   2    0.78    1.77
  -2   1   2    0.68    2.47
   1  -1  -2  301.32    9.78
   1  -1  -2  303.83    9.62
   1  -1  -2  321.85    9.89
  -1   1   2  293.54    9.99
  -1   1   2  296.12    9.94
  -1   1   2  299.14    9.57
   0  -1   2  307.68    9.88
   0  -1  -2  329.58   10.13
   0   1   2  304.42   10.13
   0   1  -2  318.33    9.92
  -1  -1  -2   55.96    3.83
  -1  -1  -2   60.46    4.71
   1  -1   2   58.98    3.74
  -1   1  -2   58.16    3.16
  -1   1  -2   58.82    3.15
  -1   1  -2   57.55    4.51
   1   1   2   51.51    3.89
   1   1   2   58.69    4.65
  -2  -1  -2   42.35    3.62
  -2  -1  -2   48.02    4.89
   2  -1   2   42.98    3.79
   2  -1   2   42.24    3.84
   2   1   2   38.12    3.75
   3  -1   2   62.82    4.99
  -3  -1  -2   68.91    5.71
   3  -1   2   60.08    3.73
  -3  -1  -2   61.62    4.39
   3   1   2   70.18    5.69
  -3   1  -2   71.56    4.09
   3   1   2   67.61    4.65
  -4  -1  -2   56.11    6.34
   4  -1   2   57.34    5.47
   4  -1   2   62.67    4.17
   4   1   2   60.54    4.61
   4   1   2   56.62    5.99
  -4   1  -2   61.32    4.79
  -4   1  -2   64.82    5.95
  -5  -1  -2    8.59    2.67
   5  -1   2   14.34    5.19
  -5  -1  -2   13.22    4.22
   5  -1   2    6.39    2.48
   5   1   2   11.39    3.02
  -5   1  -2    8.32    4.05
  -5   1  -2    8.47    2.75
   5   1   2   12.24    4.87
   6  -1   2   57.29    7.29
  -6  -1  -2   43.80    5.59
  -6  -1  -2   48.51    6.48
   6  -1   2   44.08    4.81
  -6   1  -2   42.50    5.83
   6   1   2   33.45    4.72
  -7  -1  -2   -5.66    4.15
   7  -1   2   -2.99    5.30
   7  -1   2   -0.42    4.05
  -7  -1  -2   -4.82    5.65
  -7   1  -2    3.22    5.73
  -7   1  -2    7.20    4.45
   7   1   2   -3.00    5.43
   7   1   2   -1.97    3.33
  -8  -1  -2   18.38    7.94
   8  -1   2   24.10    5.89
   8  -1   2   13.52    8.50
  -8  -1  -2   27.41    5.53
  -8   1  -2    7.00    5.19
  -8   1  -2   13.74    7.36
   8   1   2    7.57    8.58
  -9  -1  -2   49.23   11.32
   9  -1   2   78.84   13.09
   9  -1   2   61.33    8.35
  -9  -1  -2   61.62    8.52
  -9   1  -2   77.59    9.65
   9   1   2   49.58   10.07
  -9   1  -2   69.37   12.03
  -9  -2   2   49.95   12.53
   9  -2  -2   47.07    7.01
  -9  -2   2   34.92    6.76
   9  -2  -2   50.86   12.57
   9   2  -2   31.55   10.43
  -9   2   2   46.39   11.43
  -9   2   2   48.16    8.07
   8  -2  -2    8.88    5.34
   8  -2  -2   -8.24    7.66
  -8  -2   2   -7.12    3.86
  -8  -2   2    0.31    7.94
   8   2  -2   -6.24    8.00
  -8   2   2    8.48    4.76
  -7  -2   2    0.30    3.36
   7  -2  -2   -0.71    7.27
  -7  -2   2    2.85    6.29
   7  -2  -2    2.76    4.05
  -7   2   2    4.65    4.17
   7   2  -2   -5.69    8.51
   6  -2  -2   -0.91    2.81
  -6  -2   2    4.28    4.81
  -6  -2   2   -0.59    2.60
   6  -2  -2   -0.87    3.50
   6  -2  -2    4.77    5.25
  -6   2   2    3.99    3.51
   6   2  -2    0.64    3.18
  -6   2   2    2.58    5.65
   6   2  -2   -1.11   10.04
  -5  -2   2   32.37    3.53
   5  -2  -2   32.42    5.09
  -5  -2   2   40.85    5.18
   5  -2  -2   40.13    6.13
   5  -2  -2   29.81    4.13
  -5   2   2   43.56    6.64
   5   2  -2   34.07    4.40
  -5   2   2   29.90    4.04
   5   2  -2   50.75    6.45
  -4  -2   2    4.27    3.08
   4  -2  -2   -0.76    3.23
   4  -2  -2    1.33    2.02
  -4  -2   2    1.71    1.66
   4  -2  -2    0.17    2.37
  -4   2   2    9.86    4.17
   4   2  -2    4.34    2.23
   4   2  -2    3.17    3.64
  -4   2   2    4.30    2.48
   3  -2  -2   16.33    3.08
   3  -2  -2   22.88    3.13
   3  -2  -2   11.13    3.11
  -3  -2   2   12.77    2.59
  -3  -2   2   16.50    2.61
   3   2  -2   17.05    2.26
  -3   2   2   16.28    4.41
  -3   2   2   15.58    3.12
   3   2  -2   19.95    3.45
   2  -2  -2   -0.70    1.69
   2  -2  -2    1.62    1.67
   2   2  -2    0.85    2.21
   2   2  -2    0.83    2.35
  -2   2   2    0.83    2.77
  -2   2   2    1.61    2.21
  -2   2   2   -1.78    2.84
   1  -2  -2   66.62    4.92
   1  -2  -2   65.82    4.28
   1  -2  -2   64.78    3.81
  -1   2   2   74.45    5.61
  -1   2   2   68.55    4.06
  -1   2   2   69.03    5.46
   0  -2  -2   29.77    2.88
   0  -2  -2   25.33    3.29
   0   2   2   25.14    3.64
   0   2   2   26.52    3.03
   0   2   2   22.18    3.84
   0   2  -2   21.84    3.58
  -1  -2  -2  278.43    9.99
   1  -2   2  293.16   10.25
  -1  -2  -2  289.93    9.50
   1   2   2  280.06   10.25
   1   2   2  275.24    9.68
  -1   2  -2  282.64   10.70
  -2  -2  -2    4.85    3.10
  -2  -2  -2    3.89    2.02
   2  -2   2    4.55    2.24
   2   2   2    5.41    3.29
   2   2   2   -0.89    2.03
  -2   2  -2    3.41    2.30
  -2   2  -2    0.18    3.21
   3  -2   2   53.63    3.03
   3  -2   2   49.39    4.48
   3  -2   2   57.15    4.45
  -3  -2  -2   56.36    5.97
  -3  -2  -2   61.93    4.10
  -3   2  -2   53.72    3.91
   3   2   2   55.19    4.69
  -3   2  -2   60.81    5.21
   3   2   2   53.62    6.05
   4  -2   2   -2.13    2.36
  -4  -2  -2    2.14    3.93
   4  -2   2    2.58    1.75
  -4  -2  -2    3.36    2.57
   4   2   2    1.95    2.96
  -4   2  -2    1.51    3.31
   4   2   2    5.85    3.83
  -4   2  -2    2.87    2.76
   5  -2   2   46.69    4.08
   5  -2   2   46.54    5.65
  -5  -2  -2   56.52    6.85
  -5  -2  -2   46.47    4.70
   5  -2   2   61.26    6.47
   5   2   2   65.02    8.12
  -5   2  -2   45.76    5.14
   5   2   2   49.72    5.44
   6  -2   2   -1.59    2.76
  -6  -2  -2    5.15    3.35
   6  -2   2    4.39    3.81
   6  -2   2   -0.55    4.94
  -6  -2  -2    7.81    6.38
   6   2   2    6.43    3.85
   6   2   2    3.57    6.56
  -6   2  -2    3.29    3.59
  -7  -2  -2   95.44   12.40
   7  -2   2  109.72    7.74
  -7  -2  -2   96.82    8.21
   7  -2   2  114.06   11.51
   7   2   2  110.43    8.73
  -7   2  -2  104.97    8.77
  -7   2  -2  118.19   11.19
   7   2   2  109.00   12.06
   8  -2   2    6.29    4.64
  -8  -2  -2   13.42    6.02
  -8  -2  -2   23.33    9.21
   8  -2   2   21.93    8.40
   8   2   2    7.99    9.97
   8   2   2    3.75    6.38
  -8   2  -2   12.06    8.73
  -8   2  -2   29.67    6.84
   9  -2   2    5.17   10.46
  -9  -2  -2   15.41    7.69
   9  -2   2   16.03    7.09
  -9  -2  -2   23.84   11.90
   9   2   2   19.93    8.59
  -9   2  -2   33.80    9.80
  -9   2  -2    7.91    6.54
   9   2   2    3.06    9.69
   9  -3  -2   22.13   13.88
   9  -3  -2   -2.50    7.73
   9  -3  -2    2.27    7.27
  -9  -3   2   -8.94    5.72
  -9  -3   2    3.96   11.63
  -9   3   2   -3.25    6.78
   9   3  -2   -2.96   12.13
   8  -3  -2  108.99   10.05
   8  -3  -2  100.62   13.47
  -8  -3   2  126.49    8.41
  -8  -3   2  109.92   15.41
   8  -3  -2  139.85   11.76
   8   3  -2  140.23   11.41
   8   3  -2  109.11   13.54
  -8   3   2   94.97   11.21
   7  -3  -2    5.93    7.49
   7  -3  -2   11.54    4.87
   7  -3  -2    3.43    4.69
  -7  -3   2    1.69    3.63
  -7  -3   2   15.00    7.22
   7   3  -2    6.64    5.15
   7   3  -2   11.09    7.79
  -7   3   2    5.82    6.64
  -7   3   2    5.62    4.82
   6  -3  -2   46.07    8.00
  -6  -3   2   41.01    6.19
   6  -3  -2   57.06    7.44
  -6  -3   2   32.56    4.66
   6  -3  -2   42.14    5.68
   6   3  -2   55.25    6.82
  -6   3   2   48.27    8.75
   6   3  -2   36.22    7.13
  -6   3   2   37.70    5.59
  -5  -3   2    2.96    2.16
   5  -3  -2   -0.99    3.01
  -5  -3   2    2.11    4.57
   5  -3  -2    4.91    3.52
   5  -3  -2    0.17    5.22
   5   3  -2    7.39    5.06
   5   3  -2    0.11    3.11
  -5   3   2    6.27    6.18
  -5   3   2   -0.15    3.15
   4  -3  -2   19.70    2.78
   4  -3  -2   13.39    3.68
   4  -3  -2   20.91    4.97
  -4   3   2   20.73    5.40
  -4   3   2   20.76    4.00
   4   3  -2   22.53    3.17
   4   3  -2   20.83    4.67
   3  -3  -2   33.13    3.61
   3  -3  -2   23.37    3.73
   3  -3  -2   26.37    4.18
  -3   3   2   31.17    4.18
  -3   3   2   34.70    5.88
  -3   3   2   32.68    6.23
   3   3  -2   35.03    3.22
   3   3  -2   34.07    4.57
   2  -3  -2  114.50    6.53
   2  -3  -2  110.82    5.23
   2  -3  -2  112.38    7.79
   2   3  -2  105.54    6.18
  -2   3   2  111.57    7.41
  -2   3   2  126.42    8.57
  -2   3   2   95.80    5.66
   1  -3  -2   21.55    2.82
   1  -3  -2   30.37    3.94
  -1   3   2   20.84    2.85
  -1   3   2   25.86    4.37
   1   3  -2   31.83    5.74
  -1   3   2   21.19    4.46
   0  -3  -2   18.17    3.43
   0  -3  -2   20.79    2.71
   0   3   2   27.09    5.02
   0   3   2   18.22    3.72
   0   3   2   18.75    3.04
   0   3  -2   16.21    5.07
  -1  -3  -2    8.40    1.99
  -1  -3  -2    6.79    3.65
   1  -3   2    3.32    2.17
  -1   3  -2    6.93    4.43
   1   3   2    5.10    2.19
   1   3   2    9.63    3.71
   1   3   2    5.01    4.04
   2  -3   2  119.21    6.92
  -2  -3  -2  123.87    5.50
  -2  -3  -2  116.70    6.95
   2   3   2  120.78    6.25
   2   3   2  107.77    7.59
  -2   3  -2  115.09    4.98
  -2   3  -2  126.32    8.97
  -2   3  -2  119.00    7.12
  -3  -3  -2    2.09    2.28
  -3  -3  -2   -1.33    3.77
   3  -3   2   -3.13    2.29
   3   3   2    8.57    4.70
   3   3   2    5.34    2.87
  -3   3  -2    2.65    3.44
  -3   3  -2    4.22    2.21
  -3   3  -2    6.32    4.64
   4  -3   2  176.57    9.48
  -4  -3  -2  172.72    7.69
  -4  -3  -2  173.50   10.07
   4   3   2  169.03   10.54
  -4   3  -2  172.40    8.01
  -4   3  -2  176.58    9.41
   4   3   2  183.05    8.66
   5  -3   2    3.63    4.11
   5  -3   2    6.97    3.97
  -5  -3  -2   -1.85    5.76
   5  -3   2    4.58    2.63
  -5  -3  -2   -5.40    3.16
  -5   3  -2   -2.55    4.47
   5   3   2   -4.07    6.19
  -5   3  -2    0.66    3.31
   5   3   2    2.68    3.32
   6  -3   2   45.74    5.21
  -6  -3  -2   48.40    6.81
   6  -3   2   54.01    6.97
   6  -3   2   53.85    6.54
  -6  -3  -2   44.04    8.42
   6   3   2   42.57    8.33
   6   3   2   38.97    5.94
  -6   3  -2   55.62    6.83
   7  -3   2    5.91    5.25
   7  -3   2   -2.82    7.19
  -7  -3  -2    6.51    8.21
  -7  -3  -2   -5.64    4.48
   7  -3   2    9.11    4.33
   7   3   2   11.58    9.38
   7   3   2    4.95    4.74
  -7   3  -2   15.58    5.03
  -8  -3  -2   -1.65    6.40
  -8  -3  -2    9.59   11.30
   8  -3   2    8.08    5.50
   8  -3   2   14.54   11.61
   8  -3   2    0.43    6.93
  -8   3  -2    6.73    6.21
  -8   3  -2   30.80   10.50
   8   3   2   -3.71    7.34
   8   3   2   15.07   12.74
   7  -4  -2   -9.06    5.66
   7  -4  -2    1.42    6.05
  -7  -4   2   -0.23    3.80
   7  -4  -2    5.85   11.51
   7   4  -2   15.47    6.71
   7   4  -2   -2.35   10.11
  -7   4   2   -8.42    8.76
  -7   4   2   -4.63    6.27
   6  -4  -2   57.69    9.48
   6  -4  -2   44.45    7.10
   6  -4  -2   67.20    7.60
  -6   4   2   66.27    8.75
   6   4  -2   48.90    9.00
   6   4  -2   67.09    7.35
  -6   4   2   67.21   11.42
   5  -4  -2   53.19    6.85
   5  -4  -2   65.20    6.24
   5  -4  -2   52.64    8.39
  -5   4   2   75.60   10.48
  -5   4   2   62.30    7.35
   5   4  -2   57.17    7.02
   5   4  -2   77.90   10.24
   4  -4  -2  101.50    8.41
   4  -4  -2  105.24    9.75
   4  -4  -2  112.23    6.30
   4   4  -2  104.64    9.34
   4   4  -2  108.34    6.84
  -4   4   2  107.11    7.93
  -4   4   2  116.68   10.74
  -4   4   2   99.99   13.14
   3  -4  -2   34.17    5.42
   3  -4  -2   32.42    4.73
   3  -4  -2   41.30    4.23
   3   4  -2   34.28    4.87
  -3   4   2   50.13    8.65
   3   4  -2   33.46    5.38
  -3   4   2   50.16    5.60
  -3   4   2   23.66    7.92
   2  -4  -2   20.71    2.61
   2   4  -2   24.51    4.65
  -2   4   2   17.72    5.76
  -2   4   2   17.50    5.24
   2   4  -2   17.29    6.76
   2   4  -2   20.01    2.74
  -2   4   2   17.54    3.68
   1  -4  -2   10.37    3.84
   1  -4  -2   18.71    2.29
   1   4  -2   13.15    6.06
  -1   4   2   23.13    6.27
   1   4  -2   18.80    3.98
  -1   4   2   14.09    5.15
  -1   4   2   13.56    3.33
   0  -4  -2   10.26    2.08
   0  -4  -2    7.65    3.73
   0   4   2    4.80    5.52
   0   4  -2    5.68    5.72
   0   4   2    9.32    3.13
   0   4   2   18.26    5.16
  -1  -4  -2   51.19    3.73
  -1  -4  -2   54.10    6.34
   1   4   2   54.85    7.41
   1   4   2   62.24    7.80
  -1   4  -2   45.92    5.71
  -1   4  -2   56.90    3.93
   1   4   2   53.66    5.26
  -1   4  -2   52.73    8.49
   2  -4   2   48.57    6.44
  -2  -4  -2   54.34    3.97
  -2   4  -2   55.50    6.31
   2   4   2   53.64    5.55
   2   4   2   47.14    6.69
  -2   4  -2   60.53    8.24
  -2   4  -2   53.48    4.33
  -3  -4  -2    6.11    5.14
  -3  -4  -2    9.14    2.69
   3  -4   2   11.36    4.20
   3   4   2   12.44    3.75
  -3   4  -2   14.59    7.28
  -3   4  -2    9.29    5.40
  -3   4  -2   13.51    3.34
  -4  -4  -2    7.98    5.67
  -4  -4  -2   -1.86    3.26
   4  -4   2   -1.45    3.45
   4   4   2    4.10    4.14
  -4   4  -2    0.44    3.53
  -4   4  -2    4.07    5.78
   4   4   2    1.72    6.08
  -5  -4  -2    8.81    7.01
  -5  -4  -2   10.90    3.83
   5  -4   2   16.52    4.69
   5   4   2   12.97    7.66
  -5   4  -2   11.15    4.33
  -5   4  -2   -4.05    7.30
   5   4   2    6.77    4.79
  -6  -4  -2    2.84    4.62
  -6  -4  -2    0.00    8.80
   6  -4   2   -2.44    5.47
  -6   4  -2    5.23    5.47
  -6   4  -2    5.60    7.97
   6   4   2    7.40    5.67
   6   4   2   -7.76    9.10
   7  -4   2   32.68    4.89
   7  -4   2   36.69    7.31
   7  -4   2   22.27    9.08
  -7  -4  -2   31.82   12.29
   7   4   2    5.26   12.09
   7   4   2   27.76    7.47
  -7   4  -2   23.46    6.45
   6  -5  -2   30.67    9.71
   5  -5  -2    6.23    4.38
   5  -5  -2    2.49    7.90
   5  -5  -2   -1.11    5.66
   5   5  -2   -0.34    6.10
   5   5  -2    9.11    8.78
  -5   5   2   -8.04    9.67
  -5   5   2    3.48    6.07
   4  -5  -2    7.60    6.08
  -4   5   2    2.62    8.69
  -4   5   2   15.61   10.27
  -4   5   2   -1.37    5.79
   4   5  -2    5.16    7.68
   3  -5  -2   23.73    6.00
  -3   5   2   34.68    8.81
  -3   5   2   43.40    9.95
   3   5  -2   33.03    7.49
   3   5  -2   49.57    6.73
   3   5  -2   28.20   10.49
   2   5  -2   11.47    3.94
   2   5  -2   16.62    9.06
  -2   5   2   20.24    4.91
   2   5  -2   28.18    6.37
  -2   5   2   14.41    7.94
  -2   5   2   21.26    9.12
   1   5  -2   75.02   10.47
  -1   5   2   99.87   13.73
  -1   5   2   93.49    7.56
   1   5  -2   79.74    8.55
   1   5  -2   82.44    6.08
  -1   5   2   92.10   11.34
   0   5   2   35.70    8.23
   0   5   2   46.02    5.75
   0   5   2   50.45   10.25
   0   5  -2   39.60    4.91
   0   5  -2   28.32    9.12
   0   5  -2   31.25    5.67
   1   5   2   10.02    4.56
   1   5   2   -3.37    9.22
  -1   5  -2   -8.98    8.73
  -1   5  -2   -1.79    3.24
  -1   5  -2   -8.60    5.32
   1   5   2   -1.66    7.19
  -2   5  -2   -2.19    3.51
  -2   5  -2    7.91    9.03
   2   5   2    6.10    9.73
   2   5   2   -4.56    7.91
   2   5   2   -1.90    4.94
  -2   5  -2    5.87    5.97
   3  -5   2   57.38    8.40
  -3   5  -2   62.81    8.47
   3   5   2   70.29   10.22
  -3   5  -2   70.11    6.61
   3   5   2   46.22   10.27
   3   5   2   71.64    9.05
  -3   5  -2   49.55   10.31
   4  -5   2    7.00    5.99
   4   5   2   -3.28    8.66
  -4   5  -2    0.64    8.04
   4   5   2   -2.54    5.82
  -4   5  -2    3.97    5.13
  -4   5  -2   -7.95   10.74
  -5  -5  -2   42.91    9.34
   5  -5   2   37.88    8.13
  -5  -5  -2   26.78    4.70
  -5   5  -2   27.86    6.65
  -5   5  -2   36.99    9.77
   5   5   2   28.89    7.86
   5   5   2   22.57   11.72
   1   6  -2   21.41   11.63
  -1   6   2   -2.75   10.13
   1   6  -2   -4.93    5.77
  -1   6   2  -10.50   10.92
  -1   6   2   -3.23    6.39
   0   6   2   43.23   12.52
   0   6  -2   39.38    5.51
   0   6  -2   40.11   13.72
   0   6   2   29.40   10.82
   0   6  -2   27.17   10.19
   1   6   2   15.10    6.85
   1   6   2   12.45   10.18
  -1   6  -2   -3.92    5.25
   1   6   2    2.74   12.18
  -1   6  -2   30.22   12.71
  10   0  -3  -20.39   11.59
 -10   0   3    2.94    6.05
 -10   0   3   24.86   12.05
  10   0  -3    7.85    7.99
   9   0  -3   10.74    9.38
  -9   0   3   12.85    5.79
   9   0  -3   21.08    6.98
  -9   0   3   16.34    8.69
  -8   0   3    2.72    6.73
  -8   0   3    8.68    3.98
   8   0  -3   -5.71    7.26
   8   0  -3   -9.80    4.02
   7   0  -3   90.42    7.47
   7   0  -3  103.81   10.42
  -7   0   3  100.00    7.19
  -7   0   3  112.07   10.61
  -6   0   3    2.46    2.60
   6   0  -3    4.59    4.86
   6   0  -3    0.59    2.36
  -6   0   3    2.27    4.35
  -5   0   3  224.78    9.17
   5   0  -3  233.79    9.49
  -4   0   3    1.59    1.95
   4   0  -3    2.14    3.08
   4   0  -3    2.90    1.90
   3   0  -3   74.33    4.67
  -3   0   3   76.59    4.41
   3   0  -3   82.15    5.58
   2   0  -3    0.44    1.55
  -2   0   3    0.77    2.65
  -2   0   3    0.78    1.55
   2   0  -3    1.14    2.56
  -1   0   3  221.95    8.45
   1   0  -3  246.11    8.11
  -1   0   3  242.96    8.04
   1   0  -3  242.09    8.14
   0   0   3   -1.54    1.84
   0   0  -3   -0.61    1.96
   0   0   3   -0.27    1.89
   0   0  -3    0.31    1.95
   1   0   3   -0.52    2.52
  -1   0  -3    0.85    2.40
  -2   0  -3    2.14    2.40
   2   0   3    0.48    1.68
   2   0   3    2.60    2.98
  -2   0  -3    1.00    3.11
  -3   0  -3   51.31    5.31
  -3   0  -3   60.54    4.36
   3   0   3   44.59    3.89
   3   0   3   60.87    5.45
   4   0   3   -2.00    2.95
  -4   0  -3   -0.56    3.55
  -4   0  -3   -4.04    1.82
   4   0   3   -3.68    2.11
   5   0   3  147.51    8.81
  -5   0  -3  156.15    7.65
  -5   0  -3  145.63    9.05
   5   0   3  139.98    7.04
  -6   0  -3    6.23    3.50
   6   0   3    5.20    5.47
  -6   0  -3    0.06   10.97
  -7   0  -3   -2.37    6.52
   7   0   3    5.43    5.59
  -7   0  -3   -0.50    4.61
  -8   0  -3    2.23    5.48
  -8   0  -3  -10.11    7.35
   8   0   3    2.98    7.59
   9   0   3    5.32    6.65
  -9   0  -3    3.24    9.57
   9   0   3    1.78    8.90
  -9   0  -3    7.62    7.09
  10  -1  -3   41.72    8.61
  10  -1  -3   46.28   10.99
 -10  -1   3   33.90   13.31
 -10  -1   3   52.08    7.80
 -10   1   3   39.51   12.83
  10   1  -3   39.18   11.03
  10   1  -3   53.07   10.13
 -10   1   3   50.48    8.69
   9  -1  -3    5.71    5.80
  -9  -1   3   -2.58    4.87
  -9  -1   3    4.50    9.70
   9  -1  -3   14.03   10.58
  -9   1   3   15.41    8.27
  -9   1   3   10.18    5.70
   9   1  -3    6.70    6.01
   9   1  -3   10.39    9.74
   8  -1  -3   21.80    5.64
  -8  -1   3   11.68    8.08
  -8  -1   3   25.18    4.73
   8  -1  -3   25.01    8.19
   8   1  -3   24.43    5.93
  -8   1   3   15.48    4.55
  -8   1   3   23.25    7.89
   8   1  -3   20.72    8.64
   7  -1  -3   13.19    5.79
  -7  -1   3   17.08    6.58
   7  -1  -3   14.49    3.74
  -7  -1   3   13.38    3.94
   7   1  -3    8.80    6.01
   7   1  -3   15.87    3.51
  -7   1   3    9.73    3.61
   6  -1  -3   35.24    4.64
  -6  -1   3   47.25    6.40
  -6  -1   3   24.93    3.38
   6  -1  -3   38.13    6.68
   6   1  -3   51.90    7.31
  -6   1   3   37.38    5.07
   6   1  -3   36.23    5.13
   5  -1  -3  114.12    6.44
  -5  -1   3  108.58    5.74
   5  -1  -3  117.89    8.01
  -5  -1   3  125.94    7.51
  -5   1   3  110.94    6.60
   5   1  -3  112.66    7.90
  -5   1   3  120.33    8.41
  -4  -1   3  232.74    8.47
  -4  -1   3  230.06    9.27
   4  -1  -3  243.86   10.17
   4  -1  -3  237.46    9.30
  -4   1   3  244.35   10.35
   4   1  -3  238.26    9.73
  -4   1   3  228.75    9.28
  -3  -1   3    0.23    1.25
  -3  -1   3    1.21    2.40
   3  -1  -3    0.57    1.66
   3  -1  -3    5.19    2.79
  -3   1   3    1.30    1.74
  -3   1   3    0.40    2.79
  -2  -1   3   74.17    3.74
  -2  -1   3   69.66    3.73
   2  -1  -3   73.19    4.42
   2  -1  -3   71.62    4.16
   2  -1  -3   75.13    6.03
  -2   1   3   83.14    5.44
   2   1  -3   81.14    4.38
  -2   1   3   81.23    4.45
   1  -1  -3   -0.21    2.49
   1  -1  -3    0.56    1.96
   1  -1  -3   -1.83    1.65
  -1   1   3   -0.68    2.31
  -1   1   3   -0.44    2.03
  -1   1   3    1.92    1.84
   0  -1  -3  498.16   15.31
   0  -1   3  506.53   14.97
   0  -1  -3  522.52   15.62
   0   1  -3  510.03   14.88
   0   1   3  512.47   15.61
   0   1   3  511.84   15.31
  -1  -1  -3   50.31    3.87
  -1  -1  -3   43.08    4.92
   1  -1   3   45.20    3.41
   1   1   3   53.21    5.42
   1   1   3   44.49    3.74
  -1   1  -3   35.33    4.25
  -1   1  -3   40.17    3.25
   2  -1   3  186.70    7.10
  -2  -1  -3  187.20    8.24
  -2  -1  -3  184.97    7.44
   2  -1   3  177.17    6.75
   2   1   3  184.18    8.06
   2   1   3  177.93    7.38
  -2   1  -3  188.15    7.05
  -2   1  -3  173.42    7.54
  -3  -1  -3    8.28    3.42
   3  -1   3    5.08    1.64
  -3  -1  -3    8.91    1.97
   3  -1   3    6.20    2.95
   3   1   3   14.17    3.92
   3   1   3    5.99    2.47
  -3   1  -3   12.01    3.09
  -3   1  -3   12.27    2.66
   4  -1   3    7.14    1.87
   4  -1   3    4.19    3.12
  -4  -1  -3    6.82    4.38
  -4  -1  -3    9.06    2.78
  -4   1  -3    4.01    3.47
   4   1   3    9.99    4.67
   4   1   3    4.83    2.48
  -4   1  -3    4.31    1.96
   5  -1   3    2.42    3.72
   5  -1   3    2.63    2.40
  -5  -1  -3    2.86    2.41
  -5  -1  -3    1.60    4.63
  -5   1  -3    5.15    4.14
   5   1   3   -2.26    2.78
  -5   1  -3    5.67    2.37
   5   1   3   -0.71    4.29
  -6  -1  -3   55.81    8.07
  -6  -1  -3   51.69    5.71
   6  -1   3   50.34    6.61
   6  -1   3   41.80    5.02
  -6   1  -3   56.51    6.02
  -6   1  -3   53.38    7.19
   6   1   3   58.11    7.77
   6   1   3   50.96    5.84
  -7  -1  -3   67.37    7.60
   7  -1   3   80.51    7.08
  -7  -1  -3   81.97   11.30
   7  -1   3   72.97   10.11
   7   1   3   69.92    7.01
  -7   1  -3   85.59    8.02
   7   1   3   92.31   10.51
  -7   1  -3   88.34   10.39
  -8  -1  -3   35.16    9.51
  -8  -1  -3   38.08    7.66
   8  -1   3   41.83    6.11
   8  -1   3   44.94    8.65
   8   1   3   58.97   11.23
  -8   1  -3   42.14    9.06
   8   1   3   51.95    7.35
  -8   1  -3   39.37    6.07
  -9  -1  -3   16.66    6.35
   9  -1   3   13.53   10.55
  -9  -1  -3    2.72   10.20
   9  -1   3    7.12    6.97
  -9   1  -3    8.90    7.48
  -9   1  -3    1.69   11.49
   9   1   3   13.07    9.71
  -9  -2   3  -11.69   11.26
   9  -2  -3   -6.74   11.81
   9  -2  -3   12.84    7.87
  -9  -2   3    7.05    5.37
   9   2  -3   -0.79   11.38
  -9   2   3   -4.70    5.66
  -8  -2   3   45.96    6.49
   8  -2  -3   30.33    5.49
  -8  -2   3   31.34   10.07
   8  -2  -3   15.46    8.24
  -8   2   3   14.49    5.30
   8   2  -3   33.98    9.81
   7  -2  -3    4.83    6.35
  -7  -2   3   -2.91    6.27
   7  -2  -3    4.62    4.04
   7  -2  -3    6.86    3.78
  -7  -2   3   -0.30    3.36
  -7   2   3    8.11    4.63
   7   2  -3   12.34    7.61
  -7   2   3    5.27    7.12
   6  -2  -3   53.87    5.72
  -6  -2   3   62.56    6.94
  -6  -2   3   59.38    4.74
   6  -2  -3   64.10    6.65
  -6   2   3   64.02    8.87
   6   2  -3   34.64   11.46
  -6   2   3   57.38    6.32
  -5  -2   3    5.21    3.81
   5  -2  -3    4.66    2.72
   5  -2  -3    1.79    4.51
  -5  -2   3    6.98    2.22
   5  -2  -3    5.15    2.81
  -5   2   3    3.05    5.07
   5   2  -3    6.18    2.60
  -5   2   3    3.09    3.38
   5   2  -3   11.60    4.51
   4  -2  -3    6.13    2.68
  -4  -2   3    5.18    2.90
  -4  -2   3    9.26    1.63
   4  -2  -3    1.22    2.00
   4  -2  -3    5.90    3.59
  -4   2   3    6.06    3.99
   4   2  -3    6.78    2.22
  -4   2   3    2.31    2.25
   4   2  -3   10.27    4.30
   3  -2  -3   56.24    4.39
   3  -2  -3   60.83    4.67
   3  -2  -3   56.77    5.82
  -3   2   3   64.28    6.30
   3   2  -3   58.12    5.96
  -3   2   3   64.73    4.60
   3   2  -3   62.11    3.59
   2  -2  -3   80.81    6.11
   2  -2  -3   76.31    4.85
   2  -2  -3   86.35    4.88
  -2   2   3   81.24    6.49
   2   2  -3   88.45    4.21
  -2   2   3   81.12    6.15
  -2   2   3   78.36    4.92
   1  -2  -3   52.12    4.96
   1  -2  -3   51.40    3.87
   1  -2  -3   52.31    3.92
  -1   2   3   43.27    5.42
  -1   2   3   56.46    5.23
   1   2  -3   47.55    5.28
  -1   2   3   51.20    4.07
   0  -2  -3   66.64    4.20
   0  -2  -3   59.98    5.96
   0   2   3   68.14    4.50
   0   2   3   59.91    5.29
   0   2  -3   65.34    5.44
   0   2   3   62.86    5.70
  -1  -2  -3   11.22    2.43
   1  -2   3    8.04    2.08
  -1  -2  -3    5.29    3.26
   1   2   3   12.43    4.09
   1   2   3    6.41    2.26
  -1   2  -3   11.48    3.27
  -2  -2  -3   21.68    4.48
  -2  -2  -3   21.42    3.07
   2  -2   3   21.64    3.54
  -2   2  -3   20.95    3.86
   2   2   3   33.85    5.40
  -2   2  -3   21.24    4.27
  -2   2  -3   19.52    2.96
   2   2   3   15.03    2.95
  -3  -2  -3   41.58    5.10
  -3  -2  -3   39.61    3.81
   3  -2   3   40.53    4.06
   3   2   3   56.61    6.63
   3   2   3   37.00    4.23
  -3   2  -3   39.00    3.33
   4  -2   3  204.06    7.53
  -4  -2  -3  213.17    8.82
  -4  -2  -3  208.81   10.66
   4  -2   3  209.00    9.26
   4   2   3  203.50    9.04
  -4   2  -3  197.96    8.42
   4   2   3  191.79   10.65
   5  -2   3   10.15    2.38
  -5  -2  -3   13.00    2.96
   5  -2   3   12.22    4.68
  -5  -2  -3   10.20    5.22
   5  -2   3   17.60    4.06
   5   2   3    8.01    3.39
  -5   2  -3    9.86    3.51
  -6  -2  -3  105.00   10.87
   6  -2   3  121.32    8.45
  -6  -2  -3  117.72    7.75
   6  -2   3  123.90    9.85
   6  -2   3  122.99    6.74
  -6   2  -3  117.93    9.45
  -6   2  -3  112.68    8.08
   6   2   3  142.52    8.55
   6   2   3  110.11   10.96
   7  -2   3   10.88    7.06
   7  -2   3    4.24    4.92
   7  -2   3    4.74    3.66
  -7  -2  -3   12.91    8.01
  -7  -2  -3   -1.29    4.32
  -7   2  -3    7.32    4.56
   7   2   3   -5.29    8.35
   7   2   3    4.76    4.52
  -7   2  -3    9.08    6.45
  -8  -2  -3   15.87    9.43
   8  -2   3    4.82    8.33
   8  -2   3   14.51    5.18
  -8  -2  -3   10.94    6.59
   8   2   3   11.59    6.86
  -8   2  -3   -0.49    7.75
   8   2   3    4.70   11.59
  -8   2  -3    7.47    5.46
  -9  -2  -3   12.74    7.08
  -9  -2  -3    7.41   13.63
   9  -2   3    7.37    7.08
   9  -2   3   19.55   12.16
  -9   2  -3   20.02    7.20
   9   2   3   17.38    8.38
  -9   2  -3   11.62    9.64
   9   2   3   21.64   11.73
  -9  -3   3   66.45    9.09
   9  -3  -3   56.71   13.86
   9  -3  -3   62.64    8.91
   9  -3  -3   86.65   10.54
  -9  -3   3   60.93   13.12
  -9   3   3   77.27   11.06
   9   3  -3   65.94   11.53
   8  -3  -3    2.32    6.43
  -8  -3   3    5.00    4.54
  -8  -3   3   -3.30    8.31
   8  -3  -3    5.28    6.03
   8  -3  -3   18.05    9.93
   8   3  -3   -7.09   10.20
  -8   3   3    9.79    8.03
  -8   3   3   -1.89    6.63
   7  -3  -3    8.01    5.30
  -7  -3   3    6.64    6.77
  -7  -3   3    2.67    3.58
   7  -3  -3    0.57    8.96
   7  -3  -3   -1.27    4.99
   7   3  -3    3.14    4.74
  -7   3   3    3.47    7.75
  -7   3   3   -4.21    4.63
   7   3  -3   -7.44    6.72
   6  -3  -3    3.79    4.58
  -6  -3   3    3.13    2.61
   6  -3  -3    4.20    3.94
  -6  -3   3   10.84    5.49
   6   3  -3    5.31    6.90
  -6   3   3    7.32    4.12
  -6   3   3    4.50    5.99
   6   3  -3    4.17    4.01
   5  -3  -3   12.87    5.71
   5  -3  -3   21.79    3.96
   5  -3  -3   15.47    3.81
  -5   3   3   26.34    6.22
   5   3  -3   23.24    5.92
  -5   3   3   20.70    4.03
   5   3  -3   30.43    4.30
   4  -3  -3    2.61    2.82
   4  -3  -3    1.32    4.29
   4  -3  -3   -4.02    2.75
  -4   3   3   -1.36    3.11
   4   3  -3   -0.77    2.38
  -4   3   3    2.67    4.57
   4   3  -3    4.18    3.99
   3  -3  -3  192.61    9.46
   3  -3  -3  183.12    8.44
   3  -3  -3  183.16    7.82
   3   3  -3  176.00    7.84
  -3   3   3  184.56   10.15
  -3   3   3  184.80   10.54
  -3   3   3  173.04    8.24
   3   3  -3  183.10    6.78
   2  -3  -3   -0.51    3.59
   2  -3  -3    1.48    1.94
   2  -3  -3   -1.12    2.46
  -2   3   3    0.31    3.82
  -2   3   3    0.32    3.94
  -2   3   3   -0.11    2.31
   1  -3  -3   -2.86    3.14
   1  -3  -3   -1.08    1.90
   1   3  -3   -0.88    3.75
  -1   3   3    3.61    4.62
  -1   3   3   -0.20    2.10
  -1   3   3    2.79    3.71
   0  -3  -3    0.63    1.93
   0  -3  -3    1.65    3.32
   0   3  -3    1.73    4.12
   0   3   3    0.96    2.24
   0   3   3    4.97    3.86
   0   3   3   -6.90    3.91
  -1  -3  -3   86.57    6.69
   1  -3   3   94.04    5.92
  -1  -3  -3   98.73    5.00
   1   3   3   90.83    7.48
  -1   3  -3  100.51    7.95
   1   3   3   99.98    5.52
  -2  -3  -3    3.67    2.12
   2  -3   3    3.44    2.21
  -2  -3  -3   -0.41    3.87
  -2   3  -3   -1.03    4.31
   2   3   3    2.17    2.37
  -2   3  -3    3.59    5.36
   2   3   3    5.81    4.11
  -3  -3  -3  183.98    8.02
  -3  -3  -3  167.96    9.81
   3  -3   3  183.07    9.06
  -3   3  -3  201.80    7.49
   3   3   3  197.17    8.97
   3   3   3  192.83   10.42
  -3   3  -3  180.52   11.29
  -3   3  -3  188.21    8.47
   4  -3   3   10.84    3.65
  -4  -3  -3    4.30    5.47
  -4  -3  -3    7.25    2.69
   4   3   3    2.82    3.57
  -4   3  -3    6.45    4.39
  -4   3  -3    7.52    3.13
   5  -3   3    3.84    5.28
   5  -3   3   -1.97    2.38
  -5  -3  -3    8.49    6.82
   5  -3   3    0.83    3.82
  -5  -3  -3    4.47    3.49
   5   3   3   -0.30    3.42
   5   3   3    5.79    6.36
  -5   3  -3    4.28    3.58
  -6  -3  -3   -3.01    4.22
  -6  -3  -3   11.29    7.78
   6  -3   3    3.30    4.64
   6  -3   3    5.81    3.17
   6  -3   3    1.97    5.89
   6   3   3   -3.14    7.82
   6   3   3    9.07    4.75
  -6   3  -3    2.54    4.75
   7  -3   3  153.01    8.71
  -7  -3  -3  171.69   15.67
  -7  -3  -3  145.07   10.25
   7  -3   3  189.81   13.28
   7  -3   3  138.12   11.87
   7   3   3  132.83   15.75
  -7   3  -3  147.00   13.22
   7   3   3  161.72   11.59
  -7   3  -3  164.22   11.06
  -8  -3  -3   30.49   12.47
   8  -3   3   15.25    5.44
  -8  -3  -3   15.18    7.03
   8  -3   3   15.84    7.20
   8  -3   3   31.84   17.61
   8   3   3    4.02   10.64
   8   3   3   27.02    7.88
  -8   3  -3   21.34    7.52
  -8   3  -3   17.85    8.79
   7  -4  -3   16.92    7.54
   7  -4  -3   22.38    6.64
   7  -4  -3   17.76   10.29
   7   4  -3   31.49   10.68
  -7   4   3   34.79    8.55
  -7   4   3   16.53   11.54
   7   4  -3   25.75    7.10
   6  -4  -3   23.35    6.44
   6  -4  -3   31.49    5.56
  -6   4   3   18.09    5.64
   6   4  -3   33.26    6.32
  -6   4   3   34.51    8.82
   6   4  -3   12.58    7.25
   5  -4  -3   27.68    5.29
   5  -4  -3   32.11    4.85
   5  -4  -3   32.46    8.30
  -5   4   3   26.03    8.25
   5   4  -3   34.20    5.11
  -5   4   3   37.87    6.40
   4  -4  -3    8.09    6.19
   4  -4  -3    8.79    3.75
   4  -4  -3    0.04    3.56
   4   4  -3    1.02    3.58
   4   4  -3    4.93    5.33
  -4   4   3   -4.37    3.87
  -4   4   3    7.90    6.38
   3  -4  -3   14.84    5.60
   3  -4  -3   12.66    3.71
  -3   4   3    9.78    3.89
  -3   4   3    4.17    6.25
   3   4  -3   15.48    4.75
  -3   4   3    5.13    6.98
   3   4  -3   17.52    2.98
   2  -4  -3   57.66    4.72
   2  -4  -3   46.21    5.95
  -2   4   3   59.66    8.04
  -2   4   3   56.36    7.43
   2   4  -3   63.23    8.27
  -2   4   3   65.14    5.98
   1  -4  -3   94.43    5.18
   1  -4  -3   80.65    7.50
   1   4  -3   89.29   10.35
  -1   4   3   84.86    6.47
  -1   4   3   78.94    8.52
  -1   4   3   92.10   10.30
   0  -4  -3   24.12    2.94
   0  -4  -3    9.87    4.53
   0   4  -3   21.80    5.98
   0   4   3   16.87    6.19
   0   4   3   23.95    4.14
   0   4   3    8.77    5.18
  -1  -4  -3    4.62    2.53
  -1  -4  -3    3.95    4.26
  -1   4  -3    7.41    6.49
   1   4   3    7.47    5.29
   1   4   3    2.20    5.17
   1   4   3    4.83    3.66
  -2  -4  -3    0.27    2.65
   2  -4   3    4.74    3.90
  -2  -4  -3   10.87    4.87
  -2   4  -3    3.97    2.35
  -2   4  -3   -0.31    3.55
  -2   4  -3    2.61    5.85
   2   4   3   -2.17    3.66
  -3  -4  -3   24.00    6.19
  -3  -4  -3   13.31    3.00
   3  -4   3   24.18    5.10
  -3   4  -3   18.15    8.04
  -3   4  -3   21.60    3.21
   3   4   3   20.36    6.43
  -3   4  -3   15.42    4.84
   3   4   3   13.85    4.43
   4  -4   3   39.74    5.80
  -4  -4  -3   35.60    4.56
  -4  -4  -3   46.51    7.73
   4   4   3   29.45    7.51
  -4   4  -3   35.93    6.67
  -4   4  -3   36.29    4.57
   4   4   3   35.24    5.59
   5  -4   3   -1.50    4.61
  -5  -4  -3   12.35    8.20
   5   4   3   10.07    8.40
  -5   4  -3    9.37    4.56
  -5   4  -3   -5.28    6.61
   5   4   3   12.55    5.33
   6  -4   3    2.67    5.36
  -6  -4  -3   15.43    5.18
  -6  -4  -3    0.88   10.78
   6   4   3    0.19    5.74
  -6   4  -3    9.38    6.19
   6   4   3    9.55    8.96
  -7  -4  -3    4.95   12.23
  -7  -4  -3    5.87    5.88
   7  -4   3   10.75    7.20
  -7   4  -3   16.91    6.58
   7   4   3   -3.26   10.21
   7   4   3    7.66    6.75
   5  -5  -3   11.92    5.39
   5  -5  -3   16.06    7.56
   5  -5  -3   10.43    9.68
   5   5  -3    8.86    7.88
  -5   5   3   12.73    6.02
   5   5  -3   23.33    6.20
  -5   5   3   20.23   10.07
   4  -5  -3   61.76    6.42
   4  -5  -3   66.15    9.09
   4  -5  -3   56.83    9.18
  -4   5   3   61.59    8.82
  -4   5   3   54.48   11.86
  -4   5   3   56.08   10.39
   3  -5  -3   -2.82    6.65
   3  -5  -3   -2.01    3.65
  -3   5   3   -0.24    8.09
   3   5  -3   -4.59    4.24
   3   5  -3   -3.41    9.82
  -3   5   3    2.75    5.00
   3   5  -3   -6.70    6.00
  -3   5   3   -0.87    8.35
   2  -5  -3   40.85    4.10
   2   5  -3   58.74    5.82
  -2   5   3   48.50    6.30
   2   5  -3   36.19    5.93
  -2   5   3   44.59   10.20
   2   5  -3   48.85    9.96
  -2   5   3   32.33    9.85
   1   5  -3    4.66    7.99
  -1   5   3   -3.58    8.01
  -1   5   3   12.55    8.31
  -1   5   3   -5.04    4.53
   0   5  -3   13.79    8.23
   0   5   3   17.20    4.97
   0   5   3   10.06    7.73
   0   5   3   23.18    9.38
  -1   5  -3   21.71    9.39
   1   5   3   25.99    9.73
  -1   5  -3   18.43    5.12
   1   5   3   23.05    5.45
   1   5   3   16.56    7.88
  -2  -5  -3   35.04    4.96
  -2  -5  -3   29.64    7.97
   2   5   3   26.63    9.62
   2   5   3   33.58   10.72
  -2   5  -3   34.49   10.09
   2   5   3   34.32    6.42
  -2   5  -3   36.15    6.06
  -2   5  -3   32.92    4.21
  -3  -5  -3   -9.48    6.84
   3  -5   3   -0.42    5.52
  -3  -5  -3   -3.98    3.80
   3   5   3  -12.40    9.10
  -3   5  -3    0.94    6.45
   3   5   3    4.45    9.34
   3   5   3   -7.99    5.51
  -3   5  -3    9.41    9.81
  -3   5  -3    5.50    4.33
   4  -5   3   -1.93    6.14
  -4  -5  -3    3.72    8.22
  -4  -5  -3    4.33    4.73
  -4   5  -3   10.11    7.68
   4   5   3   15.45   10.14
  -4   5  -3    3.25    5.09
  -4   5  -3  -11.91   11.82
   4   5   3   15.17    6.36
  -5  -5  -3    3.35    5.34
   5  -5   3   13.25    7.76
  -5  -5  -3    4.98   10.06
  -5   5  -3   -8.57    6.07
  -5   5  -3   16.41    9.31
   5   5   3    0.52    7.36
   5   5   3    0.67   10.16
   1   6  -3   53.52   14.36
  -1   6   3   37.93   11.87
   0   6  -3   -3.77    7.53
   0   6   3  -11.66   11.10
   0   6  -3    0.47    5.09
   0   6   3   -2.34    7.62
   0   6  -3    8.91   12.29
   0   6   3   -3.29   11.31
 -10   0   4   80.90   11.29
 -10   0   4  122.76   15.90
  10   0  -4   76.58   12.95
  10   0  -4   81.47   10.87
  -9   0   4    1.19    5.63
   9   0  -4    2.86    6.08
   9   0  -4   -4.71    9.77
  -9   0   4   12.70   10.35
   8   0  -4   92.63    8.56
  -8   0   4   79.96   10.42
  -8   0   4   94.76    8.07
   8   0  -4   97.65   12.42
   7   0  -4   -6.87    3.67
   7   0  -4    8.14    6.31
  -7   0   4    3.39    5.17
  -7   0   4   -0.93    3.41
  -6   0   4   -2.27    2.64
  -6   0   4    2.29    4.46
   6   0  -4    0.23    4.74
   6   0  -4    2.71    3.01
   5   0  -4   -0.44    2.41
   5   0  -4    1.31    4.16
  -5   0   4   -1.64    2.24
   4   0  -4  206.56    9.18
   4   0  -4  190.44    8.35
  -4   0   4  204.16    8.08
   3   0  -4    1.27    2.86
  -3   0   4    2.94    2.61
   3   0  -4   -1.43    1.60
  -3   0   4    1.34    1.68
  -2   0   4   35.00    3.92
  -2   0   4   25.70    2.93
   2   0  -4   24.30    3.27
   1   0  -4   -1.63    1.68
  -1   0   4   -0.91    1.78
  -1   0   4    1.08    2.58
   1   0  -4    0.82    2.58
   0   0   4  237.82    8.04
   0   0  -4  226.94    8.74
   0   0  -4  238.17    8.53
   0   0   4  246.73    8.47
  -1   0  -4   -1.51    1.88
  -1   0  -4   -2.59    2.60
   1   0   4    1.93    1.69
   1   0   4    1.40    2.41
  -2   0  -4   77.17    5.79
   2   0   4   91.39    6.46
   2   0   4   83.65    4.48
  -2   0  -4   84.66    5.05
  -3   0  -4   -3.80    2.38
  -3   0  -4   -0.94    2.89
   3   0   4    2.78    3.40
   3   0   4    0.03    1.67
  -4   0  -4    9.17    2.76
   4   0   4   16.46    4.34
  -4   0  -4   13.94    4.26
   4   0   4   12.63    2.55
   5   0   4   -4.42    4.08
  -5   0  -4   -2.84    2.53
   5   0   4   -1.28    2.18
  -5   0  -4    4.20    4.53
   6   0   4   23.85    7.85
  -6   0  -4   28.86    6.49
  -6   0  -4   16.68    4.77
  -7   0  -4   -3.41    7.35
  -7   0  -4   -0.43    3.64
   7   0   4    2.43    6.03
  -8   0  -4   81.78   10.39
  -8   0  -4   64.99    9.35
   8   0   4   67.67   10.15
  -9   0  -4   13.37   10.60
  -9   0  -4    4.23    8.08
   9   0   4    3.46    7.20
   9   0   4  -17.40    9.11
 -10  -1   4    1.37    6.37
 -10  -1   4   18.64   13.56
  10  -1  -4   14.56   12.86
  10  -1  -4   16.75    9.10
  10   1  -4   11.60   12.04
 -10   1   4    8.11    9.32
  10   1  -4    9.53    8.22
 -10   1   4   14.79   11.50
   9  -1  -4   19.49    9.58
  -9  -1   4   -2.98    5.54
  -9  -1   4    2.81   10.03
   9  -1  -4    6.81    6.46
   9   1  -4   16.29   10.70
   9   1  -4   -1.00    5.61
  -9   1   4    1.47    5.89
  -9   1   4    0.45   10.07
   8  -1  -4   18.94    5.44
   8  -1  -4   26.87    7.75
  -8  -1   4   13.57    9.30
  -8  -1   4   12.37    4.82
  -8   1   4   15.05    4.87
   8   1  -4    8.72    7.93
   8   1  -4   17.45    5.15
  -7  -1   4  178.83   11.93
   7  -1  -4  166.07    9.36
   7  -1  -4  143.84   11.30
  -7  -1   4  153.46    8.46
   7   1  -4  159.92    9.42
   7   1  -4  163.77   11.66
  -7   1   4  150.80    9.40
  -6  -1   4   44.95    6.43
   6  -1  -4   37.45    4.96
  -6  -1   4   41.58    4.36
   6   1  -4   50.83    7.66
  -6   1   4   41.54    5.33
   6   1  -4   42.37    5.19
  -5  -1   4   83.92    6.95
   5  -1  -4   63.94    5.27
   5  -1  -4   64.72    7.32
  -5  -1   4   68.43    4.54
  -5   1   4   72.19    5.50
   5   1  -4   72.20    5.18
   5   1  -4   72.71    6.90
  -5   1   4   78.27    7.69
  -4  -1   4   15.75    2.15
   4  -1  -4   10.23    2.94
  -4  -1   4   16.13    3.87
   4  -1  -4   17.92    4.84
  -4   1   4   13.82    3.12
  -4   1   4   20.80    4.94
   4   1  -4   13.07    3.42
   4   1  -4   14.73    3.03
   3  -1  -4   -0.41    1.75
   3  -1  -4   -0.39    2.78
  -3  -1   4    0.10    1.34
  -3  -1   4    2.61    2.43
   3   1  -4   -3.41    2.37
  -3   1   4    0.47    2.92
  -3   1   4    1.68    1.72
   3   1  -4    1.25    1.66
   2  -1  -4   96.30    4.40
   2  -1  -4   94.97    5.92
   2  -1  -4   90.71    5.21
  -2   1   4   85.21    5.90
   2   1  -4   81.08    6.08
   2   1  -4   95.90    4.84
  -2   1   4   94.01    5.11
   1  -1  -4   67.99    3.83
   1  -1  -4   63.36    4.37
   1  -1  -4   63.60    5.13
   1   1  -4   67.46    3.51
  -1   1   4   58.92    3.85
  -1   1   4   60.69    4.27
   1   1  -4   57.00    3.54
  -1   1   4   60.95    5.23
   0  -1   4  852.60   27.11
   0  -1  -4  945.49   28.15
   0  -1  -4  965.15   27.20
   0   1   4  980.58   27.17
   0   1  -4  965.00   26.27
   0   1   4 1000.00   28.36
  -1  -1  -4   51.87    5.38
  -1  -1  -4   52.60    4.25
   1  -1   4   47.75    3.34
   1   1   4   51.73    5.08
  -1   1  -4   52.92    3.79
   1   1   4   55.85    4.26
  -1   1  -4   51.89    4.09
  -2  -1  -4   16.99    3.01
  -2  -1  -4   13.27    3.53
   2  -1   4   21.51    2.75
   2  -1   4   16.51    2.94
   2   1   4   24.59    4.34
   2   1   4   12.18    2.57
  -2   1  -4   12.92    3.04
  -2   1  -4   12.45    2.23
  -3  -1  -4    5.03    4.11
  -3  -1  -4    1.07    1.97
   3  -1   4    0.66    2.84
  -3   1  -4    3.41    3.01
   3   1   4    4.29    2.36
  -3   1  -4    5.04    2.29
   3   1   4    2.27    3.67
   4  -1   4   39.69    5.72
  -4  -1  -4   37.84    4.49
  -4  -1  -4   44.73    5.68
  -4   1  -4   38.46    4.12
   4   1   4   43.45    5.49
   4   1   4   43.41    4.27
  -4   1  -4   48.94    6.15
  -5  -1  -4  135.44    9.70
   5  -1   4  128.27    6.44
  -5  -1  -4  133.44    7.46
   5  -1   4  130.57    8.59
  -5   1  -4  115.57    6.99
   5   1   4  130.30    9.72
  -5   1  -4  135.22    8.89
   5   1   4  130.44    7.37
   6  -1   4   56.30    7.72
   6  -1   4   44.32    5.57
  -6  -1  -4   49.65    7.75
  -6  -1  -4   53.21    6.20
  -6   1  -4   45.15    5.93
   6   1   4   78.58    9.76
  -6   1  -4   55.34    7.05
   6   1   4   54.12    6.21
   7  -1   4   28.85    4.99
   7  -1   4   15.29    6.87
  -7  -1  -4   31.92    8.89
  -7  -1  -4   26.83    4.92
   7   1   4   39.52    6.33
  -7   1  -4   19.95    4.67
  -7   1  -4   35.21    8.35
   7   1   4   32.92    7.75
  -8  -1  -4    6.21    5.29
  -8  -1  -4    9.61    9.85
   8  -1   4   22.18    5.05
   8  -1   4    5.69    8.70
  -8   1  -4    1.23    5.92
  -8   1  -4   13.34    9.48
   8   1   4    4.11    5.54
   8   1   4   -5.56   10.01
  -9  -1  -4    9.37    6.82
  -9  -1  -4   21.77   12.27
   9  -1   4   -0.95    9.73
   9  -1   4   16.90    7.65
  -9   1  -4   31.71   11.73
   9   1   4   27.93   11.65
  -9   1  -4   18.50    6.85
   9  -2  -4   -1.45   10.26
  -9  -2   4    0.43   11.16
  -9  -2   4   12.64    5.35
   9  -2  -4   11.85    6.09
   9   2  -4   20.69    7.66
   9   2  -4   -3.82    9.50
  -9   2   4   10.62    6.56
   8  -2  -4   64.54    8.57
  -8  -2   4   72.12   18.15
   8  -2  -4   51.91    9.39
   8  -2  -4   68.48    8.80
  -8  -2   4   72.94    6.96
   8   2  -4   69.08   10.49
  -7  -2   4   43.65    7.43
   7  -2  -4   42.33    7.43
   7  -2  -4   39.09    6.09
  -7  -2   4   51.47    5.36
   7  -2  -4   54.24    7.30
   7   2  -4   44.32    8.31
  -7   2   4   52.63    6.83
  -7   2   4   32.20    7.34
   6  -2  -4   -3.92    5.88
   6  -2  -4   -1.15    2.97
  -6  -2   4    1.70    2.51
  -6  -2   4    2.48    4.89
   6  -2  -4    2.57    3.74
  -6   2   4   -2.40    4.75
   6   2  -4   -6.59   10.00
  -6   2   4   -6.45    3.23
  -5  -2   4   49.36    3.54
   5  -2  -4   46.00    5.24
   5  -2  -4   38.23    5.12
   5  -2  -4   62.25    7.54
  -5  -2   4   58.81    8.25
   5   2  -4   47.86    6.77
  -5   2   4   40.38    5.24
   4  -2  -4   49.28    6.29
   4  -2  -4   36.36    4.37
   4  -2  -4   35.48    4.36
   4   2  -4   43.84    5.46
  -4   2   4   37.45    4.50
   4   2  -4   37.18    3.63
  -4   2   4   39.58    6.26
   3  -2  -4  168.80    8.94
   3  -2  -4  165.20    7.12
   3  -2  -4  168.55    7.63
   3   2  -4  172.24    8.29
  -3   2   4  171.17    9.16
  -3   2   4  172.42    7.88
   3   2  -4  171.31    6.28
   2  -2  -4   62.94    4.25
   2  -2  -4   68.48    4.65
   2  -2  -4   61.56    6.12
  -2   2   4   64.90    6.39
  -2   2   4   63.70    4.85
  -2   2   4   65.60    5.86
   1  -2  -4   27.73    3.42
   1  -2  -4   28.49    4.14
  -1   2   4   27.18    3.90
  -1   2   4   24.33    4.09
  -1   2   4   34.34    4.12
   1   2  -4   31.28    4.55
   0  -2  -4   27.99    4.62
   0  -2  -4   33.31    3.52
   0   2   4   33.56    4.60
   0   2   4   31.52    4.28
   0   2   4   36.46    4.18
   0   2  -4   33.76    4.57
   1  -2   4  252.51    9.26
  -1  -2  -4  256.29    9.47
  -1  -2  -4  244.99   10.25
  -1   2  -4  242.60    9.72
   1   2   4  240.24    9.56
   1   2   4  244.39   10.41
   2  -2   4   50.65    4.16
  -2  -2  -4   52.81    4.30
  -2  -2  -4   57.86    6.66
   2   2   4   50.80    4.71
   2   2   4   61.02    6.32
  -2   2  -4   60.54    6.35
  -3  -2  -4  218.90    9.20
   3  -2   4  217.51    9.00
  -3  -2  -4  231.70   10.82
  -3   2  -4  225.60    8.10
   3   2   4  214.49    9.29
   3   2   4  213.52   10.60
  -4  -2  -4   50.24    5.01
   4  -2   4   53.65    3.42
  -4  -2  -4   65.66    7.85
   4  -2   4   47.32    5.04
   4  -2   4   51.11    5.49
  -4   2  -4   48.12    6.01
   4   2   4   55.57    5.42
   4   2   4   57.93    7.19
  -4   2  -4   48.74    4.59
  -5  -2  -4   -4.41    6.54
   5  -2   4    3.43    4.50
   5  -2   4    0.54    2.21
  -5  -2  -4    1.72    3.17
   5  -2   4    0.17    3.06
  -5   2  -4   10.91    3.60
   5   2   4    4.96    3.57
  -5   2  -4    1.34    4.80
   5   2   4   -1.17    4.89
  -6  -2  -4    2.99    6.73
   6  -2   4   12.31    3.17
   6  -2   4    8.58    3.71
  -6  -2  -4    7.21    3.66
   6  -2   4    5.45    5.91
   6   2   4   11.76    3.80
   6   2   4   18.82    8.08
  -6   2  -4    9.60    6.41
  -6   2  -4    6.59    4.86
  -7  -2  -4   21.24    5.03
   7  -2   4   35.86    5.56
   7  -2   4   16.01    4.57
  -7  -2  -4   16.09    7.81
   7  -2   4   22.44    8.49
   7   2   4   14.74    8.87
  -7   2  -4   17.85    8.20
   7   2   4   19.04    5.01
  -7   2  -4   19.07    4.97
  -8  -2  -4   17.74    5.82
  -8  -2  -4   10.65    9.71
   8  -2   4    4.37    9.68
   8  -2   4   33.19    7.75
   8  -2   4    9.28    5.32
  -8   2  -4   13.90    7.33
  -8   2  -4   30.21   10.49
   8   2   4   17.79    7.31
   8   2   4    5.82   11.31
   9  -2   4   42.81   13.06
  -9  -2  -4   35.67    7.89
   9  -2   4   51.89   10.86
  -9  -2  -4   45.36   12.75
   9  -2   4   30.22    7.46
   9   2   4   40.15   10.62
   9   2   4   46.88   13.10
  -9   2  -4   24.72   11.10
  -9   2  -4   36.66    9.18
   8  -3  -4   15.03    6.07
  -8  -3   4   24.60    9.05
   8  -3  -4   36.61   11.40
   8  -3  -4   17.36    6.67
  -8   3   4   21.62    9.91
  -8   3   4   32.76    8.02
   8   3  -4   31.78   10.16
   7  -3  -4   13.59    5.53
  -7  -3   4    6.65    6.59
   7  -3  -4   -2.98    4.78
   7  -3  -4    2.42    9.05
  -7  -3   4    2.61    3.31
   7   3  -4    6.76    7.47
  -7   3   4    5.23    7.35
  -7   3   4   -2.36    4.73
   6  -3  -4   51.43    7.25
   6  -3  -4   33.43    7.30
   6  -3  -4   57.39    7.25
   6   3  -4   48.44    5.77
   6   3  -4   51.65    8.07
  -6   3   4   49.48    6.65
  -6   3   4   64.24    9.52
   5  -3  -4    4.10    3.67
   5  -3  -4   -2.25    3.00
   5  -3  -4    0.99    5.59
  -5   3   4   -5.62    6.19
   5   3  -4   -4.89    4.93
   5   3  -4   -4.86    3.12
  -5   3   4   -4.16    3.60
   4  -3  -4    6.81    4.60
   4  -3  -4    5.71    2.91
   4  -3  -4   13.39    3.52
  -4   3   4   10.97    3.25
   4   3  -4    9.49    4.02
   4   3  -4   14.17    2.84
  -4   3   4    3.95    5.15
   3  -3  -4    8.63    2.73
   3  -3  -4    1.85    2.54
   3  -3  -4    6.91    4.13
   3   3  -4    3.38    2.95
  -3   3   4    1.24    4.90
  -3   3   4    5.00    4.79
  -3   3   4    0.31    2.56
   3   3  -4    1.43    1.88
   2  -3  -4  155.29    8.85
   2  -3  -4  149.01    7.43
   2  -3  -4  155.11    7.22
  -2   3   4  157.25    9.19
  -2   3   4  140.56    7.37
  -2   3   4  146.19    9.41
   1  -3  -4   12.24    3.94
   1  -3  -4   15.16    2.72
   1   3  -4    8.96    4.60
  -1   3   4   16.23    2.94
  -1   3   4   12.73    4.37
  -1   3   4   11.14    4.89
   0  -3  -4  106.64    7.48
   0  -3  -4   94.41    5.53
   0   3   4  104.20    6.14
   0   3   4  105.31    8.12
   0   3  -4   90.40    7.87
   0   3   4   92.76    7.73
  -1  -3  -4   -1.12    3.96
  -1  -3  -4   -2.03    2.75
   1  -3   4   -1.03    1.87
  -1   3  -4    0.65    3.97
   1   3   4   -0.31    2.48
   1   3   4   -5.75    4.61
   2  -3   4    1.04    2.53
  -2  -3  -4   -2.02    4.07
  -2  -3  -4    1.86    2.31
  -2   3  -4    0.69    4.27
  -2   3  -4   -1.45    2.90
   2   3   4   -5.21    3.86
   2   3   4    1.99    2.88
   3  -3   4    3.48    2.79
  -3  -3  -4    0.37    4.99
  -3  -3  -4    5.28    2.64
  -3   3  -4    0.36    3.46
  -3   3  -4    0.61    2.26
   3   3   4   -3.14    2.66
   3   3   4    1.19    6.86
   4  -3   4  104.49    7.74
  -4  -3  -4  119.85   10.59
  -4  -3  -4  115.98    7.12
   4   3   4  119.44   10.42
   4   3   4  109.31    7.60
  -4   3  -4  112.94    6.65
  -5  -3  -4    8.75    3.97
   5  -3   4   -3.57    3.50
   5   3   4   -0.21    4.09
  -5   3  -4    5.92    3.90
   5   3   4    7.46    6.69
   6  -3   4   27.82    5.08
   6  -3   4   23.79    3.50
   6  -3   4   24.87    6.35
  -6  -3  -4   24.07    9.33
  -6  -3  -4   21.49    5.02
  -6   3  -4   20.02    6.59
   6   3   4   22.77    5.12
   6   3   4   21.50    9.27
  -6   3  -4   32.57    6.03
   7  -3   4   10.83    7.73
  -7  -3  -4    4.84    6.25
   7  -3   4   10.14    4.25
   7  -3   4   -2.98    6.02
  -7  -3  -4    0.83    9.87
  -7   3  -4   12.57    6.30
   7   3   4    3.07    5.82
  -7   3  -4   13.39    7.31
   8  -3   4   11.82   10.84
   8  -3   4   -6.97    5.44
   8  -3   4   13.16    7.07
  -8  -3  -4    9.87    7.88
  -8  -3  -4    9.58   12.44
  -8   3  -4    8.41    7.18
   8   3   4   -5.63   11.07
  -8   3  -4  -14.78    9.59
   8   3   4   -6.01    7.60
   7  -4  -4   16.89    6.45
   7  -4  -4   22.61    6.63
   7  -4  -4   24.22   11.31
   7   4  -4   26.16    9.71
  -7   4   4   13.28    9.77
  -7   4   4   16.71    7.46
   7   4  -4   14.01    6.88
   6  -4  -4   15.59    5.14
   6  -4  -4   19.76    6.42
   6  -4  -4   15.24    9.25
  -6   4   4   12.44    6.32
   6   4  -4   21.63    5.93
  -6   4   4   40.48    9.74
   6   4  -4   26.04    7.93
   5  -4  -4   16.52    4.83
   5  -4  -4   35.33    5.28
   5  -4  -4   33.39    8.19
  -5   4   4   18.49    7.97
   5   4  -4   23.39    4.85
  -5   4   4   20.09    5.67
   5   4  -4   31.24    6.96
   4  -4  -4   13.71    3.70
   4  -4  -4   17.05    4.36
   4  -4  -4   16.44    7.07
   4   4  -4   17.96    5.25
  -4   4   4   19.54    5.20
   4   4  -4   10.47    3.45
  -4   4   4   28.56    7.41
   3  -4  -4   45.65    7.17
   3  -4  -4   47.43    5.47
   3  -4  -4   53.92    6.20
  -3   4   4   57.61    7.91
   3   4  -4   38.03    4.36
  -3   4   4   33.65    7.10
  -3   4   4   44.61    5.78
   3   4  -4   45.36    5.38
   2  -4  -4   -5.98    2.92
   2  -4  -4    5.15    5.32
  -2   4   4    9.94    3.81
  -2   4   4    2.80    5.27
   2   4  -4    6.98    6.56
  -2   4   4    1.28    6.04
   1  -4  -4   10.12    5.32
   1  -4  -4    6.06    3.02
  -1   4   4   13.33    7.08
  -1   4   4   12.26    5.92
   1   4  -4   11.75    6.04
  -1   4   4   10.17    3.84
   0  -4  -4    2.00    4.85
   0  -4  -4    0.68    2.77
   0   4   4    0.08    5.26
   0   4   4    3.46    3.65
   0   4  -4    5.22    5.82
  -1  -4  -4   34.53    3.81
  -1  -4  -4   45.10    6.55
  -1   4  -4   48.12    7.71
   1   4   4   32.93    6.16
   1   4   4   35.76    6.97
   1   4   4   44.33    6.01
  -2  -4  -4   13.98    3.58
   2  -4   4   20.89    4.92
  -2  -4  -4   18.20    6.10
  -2   4  -4   21.41    7.23
   2   4   4   19.83    6.59
   2   4   4   14.80    4.04
  -3  -4  -4   80.21    8.82
   3  -4   4   69.80    7.66
  -3  -4  -4   74.62    5.92
   3   4   4   78.23    7.81
  -3   4  -4   75.40    7.68
  -3   4  -4   79.53    5.59
   3   4   4   66.66    9.04
  -3   4  -4   69.22    9.61
  -4  -4  -4   13.53    7.40
  -4  -4  -4   16.05    4.25
   4  -4   4    3.27    3.98
  -4   4  -4    4.33    5.97
  -4   4  -4    8.90    3.98
   4   4   4    5.95    4.81
   4   4   4    4.31    7.86
  -5  -4  -4    7.06    4.57
  -5  -4  -4   19.51   15.40
   5  -4   4    6.17    5.84
   5   4   4    6.97    9.27
  -5   4  -4   -0.01    4.66
   5   4   4    7.83    5.67
   6  -4   4    3.46    5.94
  -6  -4  -4   -2.61    5.64
  -6  -4  -4    5.45   10.40
  -6   4  -4    9.48    6.05
   6   4   4    3.12    6.38
   6   4   4   27.16   11.69
  -7  -4  -4   14.70    7.12
  -7  -4  -4    3.78   12.82
   7  -4   4   12.26    9.74
   7   4   4    3.69   12.21
  -7   4  -4   17.51    7.18
   7   4   4    1.04    8.27
   5  -5  -4   41.24    7.37
   5  -5  -4   28.96    6.12
   5  -5  -4   20.25   10.59
   5   5  -4   20.11    8.46
  -5   5   4   18.18   10.28
  -5   5   4   36.77    8.57
   4  -5  -4   -3.39    5.23
   4  -5  -4    2.95    8.67
   4  -5  -4   -0.40    5.07
  -4   5   4    1.36    5.99
  -4   5   4    9.09    9.53
   4   5  -4   -0.46    6.41
  -4   5   4    7.11   11.47
   4   5  -4   18.36    5.06
   4   5  -4    8.29   10.31
   3  -5  -4    0.93    4.10
   3  -5  -4    1.58    7.16
  -3   5   4    2.82    5.97
  -3   5   4    5.49    8.41
   3   5  -4    0.85    4.19
  -3   5   4   11.32    9.32
   3   5  -4   -1.30    9.30
   3   5  -4    0.04    5.34
   2  -5  -4   -3.64    3.57
   2  -5  -4   -2.90    6.42
  -2   5   4   -0.99    5.62
   2   5  -4    5.61    8.81
  -2   5   4    7.50    9.31
  -2   5   4   -3.10    8.41
   1  -5  -4    4.02    3.56
   1  -5  -4   -0.42    6.76
  -1   5   4    8.18    8.11
  -1   5   4    5.83    5.24
   1   5  -4    5.16    8.54
  -1   5   4   22.79    7.93
   0  -5  -4    4.15    3.53
   0  -5  -4   13.32    7.26
   0   5  -4   -2.60    8.05
   0   5   4    9.46    8.51
   0   5   4   12.13    5.80
   0   5   4    5.35    8.16
  -1  -5  -4    7.00    3.61
  -1  -5  -4   11.56    7.54
  -1   5  -4   16.49    9.06
   1   5   4    4.39    9.84
   1   5   4   13.59    8.77
   1   5   4   -5.83    5.52
  -2  -5  -4   11.04    4.07
  -2  -5  -4   -1.48    7.46
   2   5   4   -9.49    9.28
  -2   5  -4    8.54    9.31
   2   5   4    6.12    8.35
   2   5   4    9.26    5.59
  -3  -5  -4   16.44    8.82
   3  -5   4   16.31    7.07
  -3   5  -4    1.23    9.65
   3   5   4   13.47    7.17
  -3   5  -4    5.51    4.43
   3   5   4    1.25    9.90
   3   5   4    9.25    9.67
  -3   5  -4   16.03    6.79
   4  -5   4    0.50    7.09
  -4  -5  -4    0.84    4.97
  -4  -5  -4    4.19    9.40
  -4   5  -4    2.50    5.10
   4   5   4   13.53    7.15
   4   5   4   19.00   12.41
  -4   5  -4    3.38    8.58
   5  -5   4   39.12    8.72
  -5  -5  -4   42.55    6.55
  -5  -5  -4   54.54   15.33
   5   5   4   53.67   11.16
   5   5   4   76.16   10.84
  -5   5  -4   50.36    9.88
  10   0  -5  -18.76   10.66
 -10   0   5    9.74   13.68
  10   0  -5    9.71    7.82
 -10   0   5    4.56    6.97
  -9   0   5   16.89    5.94
  -9   0   5   19.45   10.71
   9   0  -5   18.52    7.34
   9   0  -5   12.37   10.42
   8   0  -5   -1.08    4.48
  -8   0   5   -0.81    3.69
  -8   0   5   -0.29    7.65
   8   0  -5    9.07    7.59
  -7   0   5   43.92    8.53
   7   0  -5   59.86    8.77
  -7   0   5   50.37    5.96
  -6   0   5    0.28    2.52
   6   0  -5    2.57    3.54
  -5   0   5  199.35    8.69
   5   0  -5  204.86    9.15
   5   0  -5  216.94   10.45
   4   0  -5   -1.48    1.95
   4   0  -5    0.81    3.12
  -4   0   5    2.80    1.98
  -4   0   5    2.17    3.19
  -3   0   5    6.99    2.24
  -3   0   5    7.94    3.75
   3   0  -5    7.81    2.40
   3   0  -5    5.54    3.63
  -2   0   5   -1.75    1.43
  -2   0   5   -1.65    2.62
   2   0  -5   -2.10    2.71
   2   0  -5    1.98    1.84
  -1   0   5   83.51    4.17
   1   0  -5   83.12    4.46
  -1   0   5   77.13    5.17
   0   0   5    2.66    1.61
   0   0  -5    3.76    1.86
   0   0   5    3.93    2.86
   1   0   5  119.89    5.34
   1   0   5  124.65    6.27
  -1   0  -5  126.56    5.75
  -1   0  -5  119.95    6.58
   2   0   5    0.79    3.27
  -2   0  -5   -2.20    2.93
  -2   0  -5    0.85    1.80
   2   0   5    1.49    1.76
  -3   0  -5   21.36    4.72
  -3   0  -5   25.16    3.30
   3   0   5   22.91    3.23
   3   0   5   29.98    4.98
   4   0   5    1.80    2.07
   4   0   5    2.66    3.56
  -4   0  -5    2.85    3.87
  -4   0  -5   -5.94    2.41
   5   0   5   38.03    4.57
  -5   0  -5   49.46    7.13
   5   0   5   47.27    6.28
  -5   0  -5   42.35    5.38
  -6   0  -5    2.08    3.29
   6   0   5    0.09    3.38
  -6   0  -5   -0.62    5.68
   7   0   5   84.10   11.20
  -7   0  -5   78.91    8.40
  -7   0  -5   81.49    9.59
  -8   0  -5    0.10    6.30
   8   0   5    5.73    8.30
  -8   0  -5   -9.79    8.69
   9   0   5    6.45   11.23
  -9   0  -5   10.92   11.12
  -9   0  -5    8.75    8.57
  -9  -1   5   22.81    5.47
   9  -1  -5   37.16   11.63
  -9  -1   5   21.73   11.53
   9  -1  -5   23.16    6.71
   9   1  -5   16.75    9.97
  -9   1   5   10.52    5.48
   9   1  -5   29.80    6.92
  -9   1   5   14.16   11.02
  -8  -1   5   26.83    8.64
   8  -1  -5   22.94    5.79
   8  -1  -5   45.53    9.40
  -8  -1   5   23.82    5.06
  -8   1   5   26.34    5.83
   8   1  -5   23.24    5.67
   8   1  -5   17.49    7.90
   7  -1  -5    5.30    5.92
  -7  -1   5   12.75    3.49
   7  -1  -5    9.50    3.75
  -7  -1   5    6.25    7.49
  -7   1   5    8.29    4.08
   7   1  -5    0.51    5.90
   7   1  -5    6.58    4.76
   6  -1  -5   13.32    4.82
  -6  -1   5   22.21    5.45
   6  -1  -5    9.07    3.52
  -6  -1   5    5.19    2.35
   6   1  -5    9.96    2.95
  -6   1   5    7.43    3.45
  -6   1   5   19.01    5.92
   5  -1  -5    8.47    4.59
   5  -1  -5    0.53    2.68
  -5  -1   5    5.23    2.05
  -5  -1   5    8.61    4.11
   5   1  -5    3.82    4.18
   5   1  -5    5.69    2.51
  -5   1   5    6.79    4.09
  -5   1   5    5.18    2.47
  -4  -1   5    3.67    1.62
  -4  -1   5    2.94    3.44
   4  -1  -5    3.85    3.79
   4  -1  -5    6.35    2.66
  -4   1   5    4.44    2.28
   4   1  -5    0.65    3.14
  -4   1   5    0.61    3.79
   4   1  -5    7.48    2.40
  -3  -1   5   18.83    3.30
   3  -1  -5   21.36    2.69
   3  -1  -5   16.94    2.88
   3  -1  -5   16.28    3.78
  -3  -1   5   19.49    2.14
   3   1  -5   16.43    2.39
  -3   1   5   16.01    2.63
  -3   1   5   24.92    4.61
   3   1  -5   19.22    3.58
   2  -1  -5   71.81    6.02
  -2  -1   5   59.70    4.52
   2  -1  -5   64.45    4.85
  -2   1   5   63.36    5.77
  -2   1   5   67.13    4.33
   2   1  -5   65.45    4.56
   2   1  -5   71.40    3.79
   1  -1  -5    3.67    2.61
   1  -1  -5    3.57    3.03
   1   1  -5    2.57    2.08
  -1   1   5    4.35    1.77
  -1   1   5    2.41    3.59
   1   1  -5    3.24    2.28
   1   1  -5    3.74    2.30
   0  -1  -5   39.75    4.72
   0  -1  -5   32.97    3.89
   0   1  -5   34.15    3.54
   0   1  -5   31.98    3.57
   0   1   5   29.80    3.60
   0   1  -5   34.52    3.54
   0   1   5   38.94    4.58
  -1  -1  -5   55.50    4.62
   1  -1   5   53.86    3.35
  -1  -1  -5   52.79    5.84
   1   1   5   52.45    5.59
   1   1   5   56.93    4.16
  -1   1  -5   47.58    4.17
  -2  -1  -5    9.91    2.36
   2  -1   5   11.97    2.15
   2  -1   5   13.99    2.84
  -2  -1  -5    7.84    4.30
   2   1   5   16.42    4.55
  -2   1  -5   11.09    1.93
  -2   1  -5   15.84    3.27
   2   1   5   12.53    2.53
   3  -1   5   31.07    4.67
  -3  -1  -5   28.64    4.00
  -3  -1  -5   44.30    6.23
  -3   1  -5   30.94    3.61
   3   1   5   30.05    3.88
   3   1   5   29.26    4.85
  -3   1  -5   38.96    4.96
  -4  -1  -5   12.41    2.69
   4  -1   5   15.33    4.31
  -4  -1  -5   14.59    4.61
  -4   1  -5   14.56    4.64
  -4   1  -5   11.89    2.86
   4   1   5   10.44    3.39
   4   1   5   24.78    5.88
  -5  -1  -5   66.57    6.18
   5  -1   5   70.48    7.89
   5   1   5   65.91    5.96
   5   1   5   53.50    8.20
  -5   1  -5   59.24    8.10
  -5   1  -5   55.37    5.49
   6  -1   5    6.10    5.73
   6  -1   5   15.68    3.46
  -6  -1  -5   14.01    6.56
  -6  -1  -5    3.65    3.50
   6   1   5   13.16    6.08
  -6   1  -5    5.75    3.61
   6   1   5    9.81    3.95
  -6   1  -5   14.52    5.94
  -7  -1  -5   17.56    5.65
   7  -1   5   10.43    7.59
  -7  -1  -5   12.56    8.58
   7  -1   5    2.60    4.81
   7   1   5   -1.79    6.93
  -7   1  -5   16.45    6.05
  -7   1  -5    1.91    7.05
   7   1   5    4.66    4.75
  -8  -1  -5   33.27    6.66
   8  -1   5   20.05    5.88
  -8  -1  -5   28.42    9.42
   8  -1   5   35.05   10.71
  -8   1  -5   48.24    8.52
  -8   1  -5   37.70   10.74
   8   1   5   16.42   10.58
   8   1   5   28.07    7.73
   9  -1   5    8.01   12.20
   9  -1   5    4.72    7.27
  -9  -1  -5   -1.70   11.08
  -9  -1  -5   -4.01    6.96
   9   1   5    9.43   13.37
  -9   1  -5   -5.11    7.06
  -9   1  -5   -5.53   10.41
   9  -2  -5    0.47    7.22
  -9  -2   5    3.08   10.67
   9  -2  -5   14.17    6.50
  -9  -2   5   12.54    5.46
   9  -2  -5   21.86   12.45
   9   2  -5   21.07    7.95
   9   2  -5   45.37   12.59
  -9   2   5    2.13    6.57
  -8  -2   5    2.20    8.58
   8  -2  -5   15.57    5.53
   8  -2  -5    8.78    5.30
  -8  -2   5   17.09    4.34
   8  -2  -5   10.22    9.99
   8   2  -5    7.09    5.05
   8   2  -5   17.87    8.39
  -8   2   5    8.40    4.99
  -8   2   5   25.85    8.79
   7  -2  -5   -7.54    6.74
  -7  -2   5    4.92    6.15
  -7  -2   5   -0.17    3.06
   7  -2  -5    0.56    4.35
   7  -2  -5   -4.87    4.02
  -7   2   5    9.86    7.47
   7   2  -5   -5.81    6.30
   7   2  -5   -6.52    4.56
  -7   2   5    1.06    4.34
  -6  -2   5  148.21    6.83
  -6  -2   5  154.94    9.32
   6  -2  -5  157.95    9.10
   6  -2  -5  152.59   11.24
   6  -2  -5  151.64    8.59
  -6   2   5  156.26   11.73
  -6   2   5  150.52    9.15
   5  -2  -5    5.52    4.67
  -5  -2   5   -4.03    4.11
   5  -2  -5   -1.70    2.92
   5  -2  -5    0.65    2.83
  -5  -2   5    0.47    1.93
  -5   2   5   -8.32    3.30
   5   2  -5   -1.24    4.36
  -5   2   5   -2.57    5.01
   4  -2  -5  111.83    8.71
   4  -2  -5  122.72    6.28
   4  -2  -5  120.75    6.83
   4   2  -5  116.95    7.05
  -4   2   5  124.78    8.88
  -4   2   5  115.85    6.89
   3  -2  -5   34.45    3.72
   3  -2  -5   46.09    6.23
   3  -2  -5   39.19    4.32
  -3   2   5   34.15    5.12
  -3   2   5   36.27    4.30
   3   2  -5   34.59    4.38
   2  -2  -5   14.97    2.92
   2  -2  -5   13.30    2.11
   2  -2  -5   16.02    4.34
  -2   2   5   16.72    3.71
  -2   2   5   11.94    2.99
  -2   2   5   15.58    4.81
   1  -2  -5   11.59    2.55
   1  -2  -5   14.33    4.27
  -1   2   5   13.81    3.39
   1   2  -5   20.60    3.64
  -1   2   5   14.01    3.97
  -1   2   5   15.08    3.03
   0  -2  -5  351.72   13.07
   0  -2  -5  338.54   12.18
   0   2   5  343.95   13.20
   0   2   5  351.04   11.90
   0   2  -5  349.54   12.13
   0   2   5  333.26   12.18
  -1  -2  -5   19.93    4.86
   1  -2   5   18.86    2.50
  -1  -2  -5   35.55    4.50
   1   2   5   23.31    3.29
  -1   2  -5   21.82    3.95
   1   2   5   19.44    4.18
  -2  -2  -5   72.78    7.67
   2  -2   5   64.33    4.51
  -2  -2  -5   66.61    5.09
  -2   2  -5   64.85    3.85
  -2   2  -5   62.95    7.05
   2   2   5   72.05    5.20
   2   2   5   67.08    7.04
  -3  -2  -5    3.18    4.29
   3  -2   5    1.26    2.32
  -3  -2  -5   -6.08    2.59
   3   2   5    0.73    4.66
  -3   2  -5    5.02    3.21
  -3   2  -5    1.66    2.08
   3   2   5   -3.99    2.38
  -4  -2  -5   48.09    6.85
   4  -2   5   43.24    5.55
   4  -2   5   51.51    5.09
   4  -2   5   37.85    3.05
  -4  -2  -5   44.79    5.32
   4   2   5   41.80    5.39
  -4   2  -5   46.02    5.27
  -4   2  -5   32.85    4.63
   5  -2   5    9.97    3.77
  -5  -2  -5   15.16    6.29
   5  -2   5    5.02    4.59
  -5  -2  -5   12.79    4.48
   5  -2   5   11.16    2.66
  -5   2  -5   14.97    5.18
   5   2   5    9.83    3.48
   5   2   5    1.85    7.07
  -5   2  -5    8.35    3.53
  -6  -2  -5  153.09    9.99
   6  -2   5  179.17   11.52
   6  -2   5  158.51    9.61
  -6  -2  -5  169.16   13.67
   6  -2   5  162.39    7.84
   6   2   5  167.38   10.31
  -6   2  -5  163.86   11.63
   6   2   5  149.22   13.16
  -6   2  -5  196.21   10.12
   7  -2   5   -4.49    8.09
  -7  -2  -5    3.96    4.78
  -7  -2  -5    4.92    9.15
   7  -2   5    8.79    4.86
   7  -2   5    4.30    4.09
   7   2   5    3.34    5.16
  -7   2  -5   -2.55    7.87
   7   2   5   18.36    9.62
  -7   2  -5    7.33    6.14
  -8  -2  -5   14.14    6.35
   8  -2   5   15.83    7.25
   8  -2   5   17.38    5.78
   8  -2   5   -2.98   10.06
  -8  -2  -5    9.31   11.53
  -8   2  -5    9.75    6.91
   8   2   5   -0.91    9.57
   8   2   5   16.29    7.38
  -8   2  -5    7.51    9.03
   8  -3  -5    1.00    6.22
   8  -3  -5   -1.95   11.13
  -8  -3   5   -1.26    4.23
  -8  -3   5   -5.45    8.23
   8  -3  -5    6.46    6.94
  -8   3   5    0.60    5.97
   8   3  -5    6.43    9.84
  -8   3   5    9.73   10.89
   7  -3  -5   15.66    5.65
   7  -3  -5   13.93    9.28
   7  -3  -5   25.83    5.45
  -7   3   5   26.30    5.77
   7   3  -5   18.59    8.18
  -7   3   5   29.41    9.42
   6  -3  -5    0.55    4.22
   6  -3  -5   10.70    6.99
   6  -3  -5    1.76    4.22
   6   3  -5    1.02    6.43
  -6   3   5    4.51    8.21
  -6   3   5   14.56    5.16
   5  -3  -5    6.82    6.05
   5  -3  -5    0.37    3.39
   5  -3  -5    7.61    3.86
   5   3  -5    3.92    3.37
  -5   3   5   -0.19    6.72
  -5   3   5   10.15    4.34
   5   3  -5    2.67    4.98
   4  -3  -5    9.87    3.61
   4  -3  -5    7.80    2.90
   4  -3  -5   10.73    5.91
  -4   3   5    6.66    5.80
  -4   3   5   15.17    4.81
   4   3  -5    9.61    2.76
   4   3  -5   13.97    4.53
   3  -3  -5  273.38   11.09
   3  -3  -5  304.98   13.10
   3  -3  -5  293.87   11.57
  -3   3   5  299.26   12.90
   3   3  -5  261.02    9.40
  -3   3   5  294.99   11.76
   2  -3  -5   -2.84    4.12
   2  -3  -5    0.98    2.35
   2  -3  -5   -3.83    2.31
  -2   3   5    2.08    4.32
   2   3  -5    1.25    4.42
  -2   3   5    3.97    2.78
  -2   3   5    2.54    4.04
   1  -3  -5   78.72    7.52
   1  -3  -5   77.50    5.34
  -1   3   5   68.91    5.58
  -1   3   5   73.38    7.48
   1   3  -5   72.99    7.41
  -1   3   5   77.39    8.25
   0  -3  -5    3.26    2.36
   0  -3  -5    0.61    4.12
   0   3   5    0.40    2.32
   0   3   5    7.46    4.95
   0   3   5   -2.10    3.55
   0   3  -5    1.68    3.77
   1  -3   5   20.03    3.18
  -1  -3  -5   19.25    5.23
  -1  -3  -5   12.11    2.72
   1   3   5   19.73    3.69
   1   3   5   16.73    5.47
  -1   3  -5   17.18    4.66
  -2  -3  -5   -0.91    2.73
   2  -3   5   -4.87    2.86
  -2  -3  -5    4.42    4.47
  -2   3  -5    0.42    5.02
   2   3   5   -0.48    6.48
   2   3   5   -1.24    2.83
   3  -3   5  211.82    9.85
  -3  -3  -5  195.29    9.64
  -3  -3  -5  222.74   11.95
   3   3   5  208.16   10.05
  -3   3  -5  213.98    8.03
   3   3   5  209.27   12.09
  -4  -3  -5    3.50    3.62
   4  -3   5   -3.59    3.24
   4   3   5   -2.20    3.46
  -4   3  -5    7.75    3.23
   4   3   5    7.86    6.09
  -5  -3  -5   18.57    4.44
  -5  -3  -5   38.81    8.44
   5  -3   5   37.45    5.88
   5   3   5   14.64    4.26
   5   3   5   32.78    8.04
  -5   3  -5   24.21    4.85
  -6  -3  -5    3.05    4.79
   6  -3   5   14.03    5.38
  -6  -3  -5    5.71    9.60
   6   3   5   10.82    5.65
   6   3   5    4.79    8.15
  -6   3  -5    8.78    5.33
  -6   3  -5    5.56    7.03
  -7  -3  -5   56.92   12.04
   7  -3   5   43.45    6.97
   7  -3   5   42.53    4.98
   7  -3   5   61.42    9.23
  -7  -3  -5   31.79    6.51
  -7   3  -5   47.64    7.11
  -7   3  -5   38.85    9.18
   7   3   5   30.80   10.12
   7   3   5   57.24    9.13
   8  -3   5   -9.05    7.46
  -8  -3  -5   -0.03   13.79
   8  -3   5   -2.30    5.46
  -8  -3  -5  -11.41    7.60
   8  -3   5    2.63   10.89
  -8   3  -5   -6.11    7.33
   8   3   5   -4.03   11.81
   8   3   5    3.57    7.30
  -8   3  -5   -0.36    9.34
   7  -4  -5   -2.82    7.64
   7  -4  -5   -3.85    5.88
   7  -4  -5    6.83   11.27
  -7   4   5   -4.69    6.52
  -7   4   5    8.77    9.69
   7   4  -5    8.11    9.09
   6  -4  -5   38.63    6.25
   6  -4  -5   62.82   11.65
   6  -4  -5   52.68    7.14
  -6   4   5   28.88    7.94
   6   4  -5   36.26    6.30
   6   4  -5   37.74    8.59
  -6   4   5   45.17   10.18
   5  -4  -5   -4.47    4.66
   5  -4  -5    4.23    4.12
   5  -4  -5   17.44    8.11
   5   4  -5    3.32    6.65
  -5   4   5   13.21    8.92
  -5   4   5   10.43    5.66
   5   4  -5    6.36    4.50
   4  -4  -5    4.26    7.49
   4  -4  -5    0.96    3.59
   4  -4  -5    7.71    4.60
   4   4  -5    8.92    5.22
   4   4  -5    4.36    3.40
  -4   4   5   14.44    8.25
  -4   4   5   21.11    5.97
   3  -4  -5    4.51    3.51
   3  -4  -5   -3.38    6.39
   3  -4  -5   -1.02    3.81
   3   4  -5   -0.31    6.13
  -3   4   5   -1.26    4.06
  -3   4   5    1.75    5.77
  -3   4   5    6.85    7.11
   2  -4  -5   15.17    6.42
   2  -4  -5    9.73    3.81
  -2   4   5   25.67    6.44
  -2   4   5   11.42    3.97
   2   4  -5   29.79    7.71
  -2   4   5    6.02    5.94
   1  -4  -5   65.94    5.94
   1  -4  -5   86.21    8.87
  -1   4   5   85.46   10.24
  -1   4   5   62.17    8.10
   1   4  -5   79.17    9.75
  -1   4   5   79.00    6.94
   0  -4  -5   78.04    6.00
   0  -4  -5   74.70    9.69
   0   4   5   78.09   10.04
   0   4   5   73.17   10.17
   0   4   5   75.17    6.99
   0   4  -5   85.70   10.31
  -1  -4  -5   17.90    6.45
  -1  -4  -5   12.63    3.56
   1   4   5   19.13    6.33
   1   4   5   20.32    7.89
  -1   4  -5   21.11    7.16
   1   4   5   10.95    4.03
  -2  -4  -5   17.90    7.26
   2  -4   5   15.04    4.37
  -2  -4  -5   21.68    4.13
   2   4   5    9.14    6.52
   2   4   5    9.27    4.36
  -2   4  -5   19.21    7.21
  -3  -4  -5   -1.48    3.66
   3  -4   5    1.57    4.04
  -3  -4  -5    9.78    7.58
   3   4   5    2.68    7.16
  -3   4  -5    4.06    3.09
  -3   4  -5    0.20    4.73
   3   4   5   -0.31    5.07
  -3   4  -5   -0.76    7.71
  -4  -4  -5   10.89    4.55
  -4  -4  -5   -2.87    8.88
   4  -4   5    1.72    5.10
   4   4   5   -7.09    4.97
   4   4   5  -14.75    7.32
  -4   4  -5   -3.87    4.04
  -5  -4  -5   17.92    5.67
  -5  -4  -5    9.57    9.33
   5  -4   5   11.63    5.64
  -5   4  -5   18.19    5.00
   5   4   5   31.27    9.19
   5   4   5   34.93    7.69
   6  -4   5   30.26    7.54
  -6  -4  -5   24.16    6.37
  -6  -4  -5   27.59   12.46
   6   4   5   30.36   10.64
  -6   4  -5   28.09    6.78
   6   4   5   15.96    7.39
   5  -5  -5   -1.45    6.30
   5  -5  -5   13.50   11.24
   5  -5  -5    0.61    5.64
   5   5  -5    9.26    7.37
  -5   5   5   -0.70   11.84
  -5   5   5   21.84    7.41
   5   5  -5   11.32    6.94
   4  -5  -5   24.33    6.40
   4  -5  -5   43.57   11.93
   4  -5  -5   25.36    5.57
   4   5  -5   30.36    6.97
  -4   5   5   47.00    8.74
  -4   5   5   36.37   11.57
  -4   5   5   44.57   11.64
   4   5  -5   49.78   11.66
   3  -5  -5    6.92    4.86
   3  -5  -5   -1.52    7.88
  -3   5   5    5.04   10.20
   3   5  -5   -0.30    9.23
  -3   5   5   16.05   10.50
  -3   5   5   14.70    5.90
   2  -5  -5  100.69    7.77
   2  -5  -5  116.01   13.33
  -2   5   5  117.46   10.21
  -2   5   5  114.50   13.93
   2   5  -5  116.05   15.46
  -2   5   5   97.65   11.73
   1  -5  -5    9.06    4.28
   1  -5  -5   14.68    7.83
  -1   5   5   11.00    5.41
  -1   5   5   16.57    9.98
   1   5  -5   -0.89    8.88
  -1   5   5   27.45    9.90
   0  -5  -5    3.67    7.84
   0  -5  -5    5.23    4.22
   0   5   5   -1.68    8.26
   0   5   5    1.30    5.73
   0   5  -5    1.77    8.84
   0   5   5   -8.03    8.90
  -1  -5  -5   13.61    8.47
  -1  -5  -5    4.13    4.29
   1   5   5   13.90    8.34
  -1   5  -5    6.61    8.78
   1   5   5    9.17    9.19
   1   5   5   -5.81    5.21
  -2  -5  -5   54.90    6.17
  -2  -5  -5   60.89   10.20
   2   5   5   59.32    7.57
   2   5   5   52.66   10.61
  -2   5  -5   53.58   10.73
   2   5   5   58.43   10.66
  -3  -5  -5   11.56   10.00
  -3  -5  -5    9.10    5.00
   3  -5   5   -1.03    7.78
   3   5   5   -6.96   10.54
   3   5   5    8.55    6.19
  -3   5  -5   -4.20   10.11
  -3   5  -5   -0.77    6.48
   3   5   5   -1.03   10.73
  -3   5  -5   -2.33    4.33
  -4  -5  -5   62.69    7.99
  -4  -5  -5   36.41   18.29
   4  -5   5   57.40    9.62
   4   5   5   22.05   12.65
   4   5   5   43.62    9.18
  -4   5  -5   45.84    5.75
  -9   0   6    0.66    5.06
  -9   0   6  -14.58   10.77
   9   0  -6    1.45   10.10
   9   0  -6    5.74    6.81
  -8   0   6   23.68    5.38
  -8   0   6   41.02    9.29
   8   0  -6   37.58   10.07
   8   0  -6   27.54    6.28
  -7   0   6   -1.26    3.62
   7   0  -6   -4.01    6.11
  -7   0   6    6.06    6.32
   7   0  -6    6.51    4.73
   6   0  -6   31.23    5.03
  -6   0   6   32.15    4.27
   6   0  -6   36.51    7.09
  -5   0   6    2.85    2.35
   5   0  -6    0.86    2.47
   5   0  -6    0.87    4.75
   4   0  -6   45.56    4.50
  -4   0   6   39.76    4.02
  -4   0   6   46.57    6.29
   4   0  -6   52.70    6.58
   3   0  -6   -0.89    3.02
   3   0  -6   -3.86    1.97
  -3   0   6    0.93    3.35
  -3   0   6   -0.32    1.75
  -2   0   6   42.56    3.47
   2   0  -6   46.53    4.01
  -2   0   6   46.25    4.99
   2   0  -6   37.21    5.25
   1   0  -6   -1.54    2.88
  -1   0   6    1.51    1.58
  -1   0   6    5.46    5.28
   1   0  -6    0.72    1.84
   0   0  -6   28.42    3.64
   0   0   6   29.12    4.26
   0   0  -6   23.09    4.39
   0   0   6   25.56    2.74
  -1   0  -6   -2.51    3.33
   1   0   6    0.46    1.64
  -1   0  -6    0.55    2.04
   1   0   6    0.95    2.92
   2   0   6  253.45   10.22
  -2   0  -6  260.78   10.69
   2   0   6  249.91    9.25
  -2   0  -6  264.23    9.99
  -3   0  -6    6.23    4.11
   3   0   6   -0.10    1.87
   3   0   6   -0.28    3.59
  -3   0  -6   -0.95    2.50
   4   0   6  145.67    9.06
  -4   0  -6  147.36    9.54
   4   0   6  131.70    6.77
  -4   0  -6  131.97    7.50
  -5   0  -6    2.92    5.62
   5   0   6    4.38    5.24
  -5   0  -6    0.41    3.73
   5   0   6   -0.10    2.72
  -6   0  -6   22.88    5.40
   6   0   6   19.04    6.64
  -6   0  -6    7.59    7.77
  -7   0  -6   13.05    5.50
  -7   0  -6    3.40    7.84
   7   0   6    5.00    7.14
  -8   0  -6   65.20   11.59
   8   0   6   63.11   11.40
  -8   0  -6   81.28   10.46
   9   0   6    7.01   12.01
  -9   0  -6    9.71   12.55
  -9   0  -6    6.62    8.62
   9  -1  -6    2.42    9.76
  -9  -1   6   -4.62   11.25
   9  -1  -6    7.73    5.92
   9   1  -6    8.87    6.85
  -9   1   6    8.21    5.21
   9   1  -6    8.21   12.24
   8  -1  -6    1.73    4.93
  -8  -1   6    2.38    8.24
  -8  -1   6   -0.67    4.10
   8  -1  -6    6.07    8.36
  -8   1   6    4.97    4.47
   8   1  -6    0.02    4.75
   8   1  -6   20.58    9.24
  -7  -1   6   -2.24    3.38
  -7  -1   6   -0.09    6.43
   7  -1  -6   -3.69    3.85
   7  -1  -6    5.63    6.84
  -7   1   6   -1.41    3.48
   7   1  -6    5.59    6.41
   7   1  -6    2.42    4.16
  -6  -1   6   42.84    4.67
   6  -1  -6   42.21    6.07
   6  -1  -6   37.63    6.41
  -6  -1   6   64.80    8.86
   6   1  -6   63.07    8.67
  -6   1   6   42.31    5.84
   6   1  -6   42.91    5.79
  -6   1   6   44.44    6.55
  -5  -1   6   74.32    7.36
   5  -1  -6   72.50    8.70
   5  -1  -6   52.37    5.32
  -5  -1   6   71.73    4.49
   5   1  -6   52.34    5.08
   5   1  -6   63.62    7.37
  -5   1   6   76.57    8.41
  -5   1   6   63.19    5.28
  -4  -1   6   91.41    7.24
   4  -1  -6  108.32    8.18
  -4  -1   6   98.36    5.02
   4  -1  -6  112.13    6.46
  -4   1   6  100.42    8.35
   4   1  -6  102.53    5.74
  -4   1   6  109.81    6.21
   4   1  -6  106.09    7.20
   3  -1  -6    4.47    2.53
   3  -1  -6    5.86    3.50
  -3  -1   6    6.93    1.50
   3  -1  -6    5.18    1.53
  -3   1   6    3.80    2.84
  -3   1   6    2.75    3.87
   3   1  -6    4.72    1.91
   3   1  -6   10.35    3.45
   2  -1  -6    1.72    3.37
  -2  -1   6   -0.57    1.30
   2  -1  -6    0.27    1.91
   2   1  -6    3.34    2.56
  -2   1   6    2.66    3.34
  -2   1   6    3.00    1.98
   2   1  -6    1.38    1.60
   1  -1  -6   63.77    6.06
   1  -1  -6   65.29    4.94
   1   1  -6   61.15    4.09
  -1   1   6   63.32    4.46
   1   1  -6   64.01    3.58
  -1   1   6   48.26    6.08
   1   1  -6   65.23    4.63
   0  -1  -6  138.26    7.64
   0  -1  -6  131.40    6.63
   0   1   6  129.57    6.27
   0   1   6  136.55    7.78
   0   1  -6  130.58    5.70
   0   1  -6  133.11    6.08
   0   1  -6  120.39    5.65
  -1  -1  -6   87.64    5.50
  -1  -1  -6   92.11    6.92
   1  -1   6   86.72    4.01
   1  -1   6   87.61    4.51
   1   1   6   83.84    5.16
   1   1   6   80.53    6.60
  -1   1  -6   92.09    4.47
  -1   1  -6   76.72    6.32
   2  -1   6   81.65    4.56
   2  -1   6   84.56    5.32
  -2  -1  -6   87.50    5.90
  -2  -1  -6   88.93    7.52
  -2   1  -6   88.59    5.98
  -2   1  -6   90.17    4.80
   2   1   6   91.02    5.62
   2   1   6   91.69    7.33
  -3  -1  -6    2.68    2.41
  -3  -1  -6    0.55    4.65
  -3   1  -6    2.84    3.51
   3   1   6    6.86    2.57
  -3   1  -6    5.61    2.62
   3   1   6    0.24    3.73
  -4  -1  -6   18.77    3.95
   4  -1   6   22.54    4.87
  -4  -1  -6   19.63    5.53
   4   1   6   17.71    5.62
  -4   1  -6   24.40    5.02
  -4   1  -6   16.82    3.03
   4   1   6   18.50    3.22
   5  -1   6  104.16    9.23
  -5  -1  -6   97.85    7.59
  -5  -1  -6  100.95   10.19
   5   1   6   94.96    7.20
  -5   1  -6   90.33    7.04
   5   1   6  100.13    9.89
  -6  -1  -6   53.17    7.46
   6  -1   6   73.39   10.49
  -6  -1  -6   56.70    8.80
   6   1   6   60.20    6.92
   6   1   6   85.25   10.61
  -6   1  -6   66.11    7.42
  -6   1  -6   61.19    9.06
  -7  -1  -6   53.99    7.80
   7  -1   6   34.62    5.53
   7  -1   6   28.92    8.39
  -7  -1  -6   29.31    9.23
  -7   1  -6   31.21    6.22
   7   1   6   55.29   10.11
  -7   1  -6   37.44    9.04
   7   1   6   40.97    6.59
  -8  -1  -6    1.26    9.35
   8  -1   6    2.62    6.05
   8  -1   6   -2.19    9.58
  -8  -1  -6   10.09    5.89
   8   1   6    7.69    6.40
  -8   1  -6   -2.58    7.69
   8   1   6    0.76   10.77
  -8   1  -6   -8.42    9.10
   9  -1   6    1.41   15.08
  -9  -1  -6  -14.71   11.11
   9  -1   6    5.38    7.88
  -9   1  -6  -21.80   11.17
   9   1   6    2.27   12.11
  -9   1  -6   19.67    8.83
   9  -2  -6   13.49   11.49
   9  -2  -6   21.29    7.08
  -9  -2   6   21.56    5.55
   9  -2  -6   35.38    7.81
  -9  -2   6   31.55   11.57
  -9   2   6   32.97    7.45
   9   2  -6   26.39   11.01
   9   2  -6   33.67    7.27
   8  -2  -6   72.91    9.78
  -8  -2   6   57.68    6.90
  -8  -2   6   45.64    9.95
   8  -2  -6   73.17    8.56
   8  -2  -6   40.67    9.35
  -8   2   6   45.00    6.81
   8   2  -6   41.26   10.58
   8   2  -6   64.92    9.07
  -8   2   6   47.25   10.49
  -7  -2   6   81.89   10.80
   7  -2  -6   75.77    7.86
   7  -2  -6   96.77    8.95
  -7  -2   6   86.03    6.10
   7  -2  -6  106.59   12.53
  -7   2   6   97.43   12.26
   7   2  -6   84.33   11.28
   7   2  -6   92.11    8.27
  -6  -2   6   -3.89    4.54
   6  -2  -6   -1.99    6.65
   6  -2  -6    9.10    3.77
  -6  -2   6    5.37    2.64
   6  -2  -6   -4.64    3.07
   6   2  -6   -6.52    6.10
  -6   2   6    2.21    6.94
   6   2  -6   10.53    3.97
  -6   2   6    2.82    3.81
   5  -2  -6    6.77    5.27
  -5  -2   6    4.16    1.92
   5  -2  -6    2.68    3.94
  -5  -2   6   11.20    3.65
   5  -2  -6    1.40    2.71
   5   2  -6    7.34    2.80
  -5   2   6   -0.88    3.03
  -5   2   6    7.05    5.66
   5   2  -6    6.69    4.72
   4  -2  -6   39.48    3.98
   4  -2  -6   37.70    6.40
   4  -2  -6   26.01    3.70
  -4   2   6   47.43    8.71
  -4   2   6   28.36    4.21
   4   2  -6   36.95    4.07
   4   2  -6   41.96    5.09
   3  -2  -6  172.87    7.31
   3  -2  -6  173.58   10.16
   3  -2  -6  180.93    8.63
  -3   2   6  205.04   10.71
  -3   2   6  177.47    8.58
   3   2  -6  185.83    7.72
   2  -2  -6   70.15    7.30
   2  -2  -6   58.95    5.08
   2  -2  -6   56.44    3.71
  -2   2   6   63.84    5.20
  -2   2   6   68.23    6.01
  -2   2   6   56.37    7.36
   1  -2  -6  252.06   11.17
   1  -2  -6  227.63    9.73
  -1   2   6  228.50    9.70
  -1   2   6  231.66    9.87
   1   2  -6  231.74    9.47
  -1   2   6  253.14   11.50
   0  -2  -6   52.15    6.94
   0  -2  -6   51.78    4.80
   0   2   6   52.79    4.76
   0   2   6   58.20    5.06
   0   2   6   59.68    7.24
   0   2  -6   50.57    5.34
   1  -2   6   24.11    2.88
  -1  -2  -6   16.06    3.16
  -1  -2  -6   23.49    4.81
  -1   2  -6   22.33    4.04
   1   2   6   29.62    6.32
   1   2   6   24.12    4.15
  -2  -2  -6   77.92    8.22
   2  -2   6   80.21    4.91
  -2  -2  -6   77.81    5.88
   2   2   6   84.03    6.01
  -2   2  -6   90.60    4.39
  -2   2  -6   84.05    5.47
   2   2   6   79.50    8.12
  -3  -2  -6   67.79    6.01
   3  -2   6   74.85    4.93
  -3  -2  -6   75.08    9.15
   3   2   6   77.65    8.37
  -3   2  -6   74.99    6.27
  -3   2  -6   75.81    4.95
   3   2   6   74.57    5.93
   4  -2   6   57.98    3.56
   4  -2   6   66.10    5.62
  -4  -2  -6   67.04    6.47
  -4  -2  -6   57.31    8.62
   4  -2   6   51.36    5.72
  -4   2  -6   65.57    5.33
   4   2   6   76.99    8.73
   4   2   6   67.39    6.27
  -4   2  -6   63.36    7.21
  -5  -2  -6   24.40    4.85
   5  -2   6   26.63    5.07
   5  -2   6   28.30    5.24
   5  -2   6   21.72    3.10
  -5  -2  -6   27.73    7.30
   5   2   6   26.35    8.28
   5   2   6   19.82    4.84
  -5   2  -6   19.60    3.93
  -6  -2  -6    8.07    4.98
   6  -2   6   15.46    4.53
  -6  -2  -6   -0.77    7.58
   6  -2   6    0.71    3.16
   6  -2   6   14.29    6.89
   6   2   6    0.29    4.32
  -6   2  -6   -2.55    4.24
  -6   2  -6   -5.35    6.29
   6   2   6    4.49    7.28
   7  -2   6   20.01    8.74
   7  -2   6   23.99    6.64
  -7  -2  -6   15.02    5.98
   7  -2   6   22.16    4.70
  -7  -2  -6   18.63    9.37
  -7   2  -6   14.24    6.21
   7   2   6   22.57    6.60
   7   2   6   11.25   10.18
  -7   2  -6   22.32    9.19
   8  -2   6   12.35   10.98
   8  -2   6    8.92    6.55
  -8  -2  -6    4.78   10.56
   8  -2   6   26.05    5.85
  -8  -2  -6   20.81    6.62
   8   2   6   14.96   10.69
  -8   2  -6    7.59    7.21
  -8   2  -6   17.58   11.13
   8   2   6   10.33    6.39
   8  -3  -6    6.04   10.54
   8  -3  -6    4.11    7.45
   8  -3  -6    5.85    6.92
  -8  -3   6   -5.56    4.16
  -8  -3   6   -0.16    8.10
  -8   3   6    1.91    6.69
  -8   3   6    6.28   10.49
   8   3  -6   -2.25   11.05
   8   3  -6  -10.97    6.13
   7  -3  -6    6.85    4.48
   7  -3  -6   16.61    6.00
   7  -3  -6   11.24    8.63
  -7   3   6    5.98    5.61
  -7   3   6    7.74    8.39
   7   3  -6   -3.34    8.20
   6  -3  -6   83.00    7.92
   6  -3  -6   76.83    8.46
   6  -3  -6   88.53   12.70
  -6   3   6   73.76    8.52
  -6   3   6   86.36   11.87
   6   3  -6   75.18   10.58
   5  -3  -6   -0.74    3.87
   5  -3  -6   -0.63    3.37
   5  -3  -6    3.18    6.33
   5   3  -6   -4.34    5.16
  -5   3   6   -1.54    3.62
  -5   3   6   -1.90    6.21
   4  -3  -6   85.82   11.63
   4  -3  -6  116.88    7.96
   4  -3  -6  107.11    6.97
  -4   3   6  102.92    7.94
  -4   3   6  108.36   11.46
   4   3  -6  101.59    7.52
   3  -3  -6    0.01    3.19
   3  -3  -6    2.20    2.44
   3  -3  -6    0.04    5.10
  -3   3   6    2.18    3.75
  -3   3   6    3.32    5.69
  -3   3   6    5.46    5.06
   3   3  -6    4.31    3.23
   2  -3  -6   -6.08    4.89
   2  -3  -6   -1.21    2.67
  -2   3   6    3.64    3.30
  -2   3   6    0.42    4.16
  -2   3   6    1.03    6.15
   2   3  -6    4.43    5.01
   1  -3  -6    2.80    2.89
   1  -3  -6   -2.06    4.66
  -1   3   6    5.03    4.54
   1   3  -6    0.47    4.37
  -1   3   6    3.22    3.07
  -1   3   6    4.50   10.99
   0  -3  -6   21.60    5.29
   0  -3  -6   23.90    4.08
   0   3   6   23.07    4.98
   0   3   6   14.43   11.30
   0   3  -6   24.32    5.61
   0   3   6   15.82    3.52
  -1  -3  -6   12.51    5.40
   1  -3   6    7.71    2.71
  -1  -3  -6    6.47    3.37
   1   3   6    9.34    3.88
  -1   3  -6    8.37    4.78
   1   3   6   17.40    5.17
  -2  -3  -6  125.28    7.71
   2  -3   6  126.45    7.30
  -2  -3  -6  138.51   10.31
   2   3   6  141.31   10.92
  -2   3  -6  131.18    9.97
   2   3   6  135.96    8.38
   3  -3   6    1.22    3.34
  -3  -3  -6    7.24    3.32
   3   3   6   17.33    4.58
  -3   3  -6    1.68    2.87
   3   3   6   -1.63    5.80
  -4  -3  -6    2.03    4.27
   4  -3   6   -0.03    3.52
  -4  -3  -6   -4.81    6.79
   4   3   6    3.38    3.98
   4   3   6    5.05    6.53
  -4   3  -6   -3.09    4.72
  -4   3  -6    3.96    3.24
   5  -3   6    0.11    4.03
  -5  -3  -6    2.34    7.83
  -5  -3  -6    3.25    4.61
  -5   3  -6   11.24    4.29
   5   3   6    5.97    4.57
  -5   3  -6   -1.27    6.44
   5   3   6   -5.71    8.79
  -6  -3  -6   24.95    6.71
  -6  -3  -6   28.17   10.96
   6  -3   6   11.72    5.30
  -6   3  -6   16.43    7.74
   6   3   6   12.63    9.22
  -6   3  -6   16.76    5.50
   6   3   6    4.62    5.57
  -7  -3  -6    6.91   12.38
   7  -3   6   10.25    7.60
   7  -3   6    4.79    4.43
  -7  -3  -6    5.00    6.47
   7  -3   6    5.50    7.53
  -7   3  -6    2.41    8.49
   7   3   6   10.84    6.71
  -7   3  -6   16.40    7.37
   7   3   6    9.82   12.25
   7  -4  -6   37.98    7.40
   7  -4  -6   46.60   12.54
   7  -4  -6   47.11    9.02
   7   4  -6   31.50   10.27
  -7   4   6   32.34   11.85
  -7   4   6   40.65    8.74
   6  -4  -6   24.30    7.34
   6  -4  -6   17.09    4.95
   6  -4  -6   11.55    9.42
  -6   4   6   16.43   10.28
   6   4  -6    4.84    7.69
  -6   4   6   15.47    6.58
   5  -4  -6    8.35    4.28
   5  -4  -6   -4.28    7.80
   5  -4  -6   -2.61    5.26
   5   4  -6   10.37    4.72
  -5   4   6    1.78    8.55
  -5   4   6    7.46    5.73
   5   4  -6    9.37    6.65
   4  -4  -6   -2.76    4.46
   4  -4  -6    3.80    4.48
   4  -4  -6   -4.99    7.02
   4   4  -6    0.61    5.27
  -4   4   6    0.92    4.67
   4   4  -6   -1.71    3.68
  -4   4   6   -0.54    6.83
   3  -4  -6   23.42    4.12
   3  -4  -6   40.31    6.18
   3   4  -6   34.88    8.19
  -3   4   6   35.20    6.30
  -3   4   6   48.90    8.16
  -3   4   6   32.06    7.82
   2  -4  -6   25.21    7.39
   2  -4  -6   23.65    4.70
  -2   4   6   21.90    7.22
   2   4  -6   16.93    6.62
  -2   4   6   17.25    5.37
  -2   4   6   24.25    8.61
   1  -4  -6   62.28    7.91
   1  -4  -6   50.47    6.54
   1   4  -6   75.69    8.91
  -1   4   6   55.70    7.23
  -1   4   6   74.49    8.81
  -1   4   6   60.03    8.27
   0  -4  -6    4.64    4.10
   0  -4  -6    6.82    6.13
   0   4   6    7.91    6.68
   0   4   6   -1.65    5.83
   0   4  -6   15.50    6.96
   0   4   6   -0.75    3.70
  -1  -4  -6   -3.63    3.98
  -1  -4  -6    5.20    6.82
  -1   4  -6    6.68    5.98
   1   4   6   -0.03    4.62
   1   4   6    4.15    7.14
   1   4   6    6.06    6.32
  -2  -4  -6   12.92    4.43
   2  -4   6   14.21    4.11
   2   4   6   17.88    6.92
   2   4   6   21.34    7.25
  -2   4  -6   21.87    7.83
   2   4   6   11.86    4.98
  -3  -4  -6   65.77    7.53
  -3  -4  -6   72.05    9.52
   3  -4   6   77.36    8.08
  -3   4  -6   66.12    5.73
   3   4   6   66.43   11.22
   3   4   6   73.27    8.78
  -4  -4  -6   56.72    7.83
  -4  -4  -6   48.86    9.84
   4  -4   6   43.99    6.28
   4   4   6   66.45   12.43
   4   4   6   47.19    7.38
  -4   4  -6   58.94    6.72
  -5  -4  -6   36.33    7.28
  -5  -4  -6   20.88   11.05
   5  -4   6   39.55    7.34
   5   4   6   37.53    8.05
  -5   4  -6   33.49    5.60
   5   4   6   18.48   10.20
   6  -4   6   10.53    6.92
  -6  -4  -6   -1.33   11.85
  -6  -4  -6   -1.65    6.49
   6   4   6   18.92   12.12
  -6   4  -6    8.17    8.64
  -6   4  -6   28.02    6.89
   6   4   6   -4.60    8.33
   4  -5  -6    4.05   10.02
   4  -5  -6   -0.20    6.09
   4   5  -6    5.04    5.59
   4   5  -6   -3.18   10.31
  -4   5   6  -10.54    6.87
   4   5  -6    5.18    6.18
  -4   5   6   -5.16   11.35
  -4   5   6   16.33   12.61
   3  -5  -6   -2.39   10.88
   3  -5  -6   -0.58    5.36
  -3   5   6   15.00    9.37
   3   5  -6    6.76   10.04
  -3   5   6   -4.10    9.78
  -3   5   6   -1.09    6.44
   2  -5  -6    0.91    5.15
  -2   5   6    8.66    6.73
   2   5  -6    4.67    9.25
  -2   5   6   19.94    8.79
  -2   5   6   11.53    9.72
   1  -5  -6   14.96   11.57
   1  -5  -6   19.62    5.01
   1   5  -6   23.34    9.32
  -1   5   6   44.14    7.98
  -1   5   6   20.47    9.41
  -1   5   6   13.94    9.22
   0  -5  -6    7.82    9.76
   0  -5  -6   -1.93    4.99
   0   5  -6    7.04    8.99
   0   5   6    4.19   10.18
   0   5   6   18.57    7.21
   0   5   6  -10.48    9.62
  -1  -5  -6   65.79    7.44
  -1  -5  -6   62.03   19.74
  -1   5  -6   52.36   10.74
   1   5   6   53.28    7.54
   1   5   6   45.72   10.88
   1   5   6   56.08   11.63
  -2  -5  -6    9.81    5.15
  -2  -5  -6   10.81   16.69
   2   5   6   13.85   10.82
   2   5   6   12.04    7.27
  -2   5  -6   13.49   10.31
   2   5   6   19.33   10.78
  -3  -5  -6    5.75   10.91
   3  -5   6   -2.40    6.15
  -3  -5  -6    2.62    5.65
   3   5   6   16.78   11.25
   3   5   6   -4.74    7.35
  -3   5  -6   16.98    6.73
  -3   5  -6    3.43    4.82
  -3   5  -6   -3.93   11.02
   3   5   6   13.50   10.83
  -4  -5  -6    2.16    6.26
   4  -5   6    3.59    7.01
  -4  -5  -6   -4.26   12.42
   4   5   6   -6.28   12.17
   4   5   6   -2.22    7.91
  -9   0   7   41.37   12.55
   9   0  -7   19.67   11.39
   9   0  -7   34.99    8.46
  -9   0   7   21.18    5.82
   8   0  -7    4.57    5.47
  -8   0   7    4.47    9.68
   8   0  -7   -7.44    8.37
  -8   0   7   -2.55    4.13
   7   0  -7   83.16    7.36
   7   0  -7   78.29   10.89
  -7   0   7   84.59    7.27
   6   0  -7    1.38    4.95
  -6   0   7    4.05    3.00
   6   0  -7   -5.72    2.93
  -5   0   7  154.64    9.20
   5   0  -7  148.18   10.83
   5   0  -7  144.49    7.86
  -5   0   7  143.33    7.46
  -4   0   7    2.00    2.42
   4   0  -7    3.54    2.65
   4   0  -7    0.52    4.03
  -4   0   7   -2.56    3.86
   3   0  -7   32.89    5.31
  -3   0   7   29.72    3.50
  -3   0   7   30.28    4.44
   3   0  -7   23.91    3.60
   2   0  -7    1.31    3.30
  -2   0   7   -3.44    2.99
  -2   0   7    0.45    1.58
   2   0  -7    0.10    2.04
  -1   0   7   44.24    3.51
   1   0  -7   43.53    5.90
   1   0  -7   51.68    4.18
  -1   0   7   50.87    5.31
   0   0  -7    1.14    3.59
   0   0  -7    2.29    2.26
   0   0   7    3.78    1.72
   0   0   7    2.84    3.19
  -1   0  -7  314.57   11.45
   1   0   7  311.95   11.63
  -1   0  -7  325.51   12.20
   1   0   7  316.20   10.81
  -2   0  -7   -1.43    2.67
   2   0   7    2.32    3.46
  -2   0  -7    0.85    3.71
   2   0   7   -1.71    1.67
  -3   0  -7   62.04    5.43
   3   0   7   65.49    6.86
   3   0   7   54.17    4.49
  -3   0  -7   71.50    7.71
   4   0   7    2.44    2.87
   4   0   7    0.07    4.84
  -4   0  -7   -3.33    4.78
  -4   0  -7    0.40    2.69
  -5   0  -7   10.47    3.80
  -5   0  -7   20.38    6.16
   5   0   7   15.00    6.09
   5   0   7   12.23    3.47
   6   0   7    1.05    6.39
   6   0   7    9.56    4.01
  -6   0  -7    1.76    6.50
  -6   0  -7   -9.68    4.21
  -7   0  -7  198.36   16.61
   7   0   7  220.85   15.99
  -7   0  -7  223.08   13.07
  -8   0  -7    9.73   11.42
  -8   0  -7    3.19    6.45
   8   0   7   15.63   12.03
   9  -1  -7    1.09    9.60
  -9  -1   7    7.38   11.81
   9  -1  -7   -4.43    6.84
  -9  -1   7    4.34    5.31
  -9   1   7    4.42    5.84
   9   1  -7   13.63    8.03
   9   1  -7   31.08   11.71
  -8  -1   7   51.20    7.23
   8  -1  -7   65.14    8.61
   8  -1  -7   69.02   11.55
  -8  -1   7   77.30   11.16
  -8   1   7   60.66    8.39
   8   1  -7   45.56    7.17
   8   1  -7   42.04    8.93
  -7  -1   7   77.32    9.70
   7  -1  -7   62.13    7.40
  -7  -1   7   60.65    5.95
   7  -1  -7   63.76    9.60
   7   1  -7   63.06    9.12
  -7   1   7   53.43    7.09
  -7   1   7   52.21    8.47
   7   1  -7   69.01    7.78
  -6  -1   7   49.66    7.15
  -6  -1   7   40.38    4.60
   6  -1  -7   36.42    5.17
   6  -1  -7   47.85    8.81
  -6   1   7   33.70    6.74
   6   1  -7   36.58    6.41
   6   1  -7   55.30    6.62
  -6   1   7   41.27    5.74
   5  -1  -7   59.73    8.33
  -5  -1   7   61.94    6.89
  -5  -1   7   58.95    4.41
   5  -1  -7   56.00    5.90
  -5   1   7   58.20    8.58
  -5   1   7   52.34    5.43
   5   1  -7   44.28    5.39
   5   1  -7   63.75    7.39
   4  -1  -7   -0.19    4.29
  -4  -1   7    0.95    1.81
  -4  -1   7    3.87    3.87
   4  -1  -7   10.43    3.42
   4   1  -7    3.80    3.64
  -4   1   7    7.66    5.38
   4   1  -7    3.53    2.42
  -4   1   7    6.94    2.81
   3  -1  -7   14.95    1.98
   3  -1  -7    9.33    4.02
  -3  -1   7   14.05    1.86
   3  -1  -7   18.14    3.57
   3   1  -7   12.10    2.64
  -3   1   7   16.95    3.26
  -3   1   7   16.47    4.41
   3   1  -7   17.22    4.17
   2  -1  -7   89.04    7.25
  -2  -1   7   76.00    3.54
   2  -1  -7   87.96    5.61
   2   1  -7   86.35    5.93
   2   1  -7   74.43    4.19
  -2   1   7   81.53    5.13
  -2   1   7   90.75    7.30
   1  -1  -7   34.58    4.25
   1  -1  -7   46.01    6.48
  -1   1   7   45.10    6.40
   1   1  -7   44.90    3.08
   1   1  -7   48.76    4.90
  -1   1   7   39.37    3.90
   1   1  -7   39.52    3.67
   0  -1  -7  197.93    8.82
   0  -1  -7  202.72   10.01
   0   1   7  216.44   10.07
   0   1   7  213.86    8.65
   0   1  -7  213.09    7.55
   0   1  -7  201.84    8.32
   1  -1   7    4.75    1.40
  -1  -1  -7    5.84    4.61
   1  -1   7    3.47    1.45
  -1  -1  -7    7.92    2.57
   1  -1   7    6.26    2.56
   1   1   7    4.17    2.16
  -1   1  -7    7.27    2.06
   1   1   7    5.70    4.69
  -1   1  -7    4.60    3.23
  -2  -1  -7    1.51    2.43
  -2  -1  -7    1.75    4.08
   2  -1   7    7.65    3.09
   2  -1   7    5.79    1.90
   2  -1   7    7.08    1.54
   2   1   7   10.44    4.62
  -2   1  -7    2.74    3.48
  -2   1  -7    5.45    2.73
   2   1   7    5.22    2.62
  -3  -1  -7   11.59    5.55
  -3  -1  -7   15.31    3.64
   3  -1   7    8.92    2.35
   3  -1   7   11.83    3.86
   3   1   7   22.71    6.10
   3   1   7   21.44    3.51
  -3   1  -7   12.37    2.67
  -3   1  -7    9.42    4.48
   4  -1   7  147.16    9.46
  -4  -1  -7  168.19   11.41
  -4  -1  -7  147.67    8.74
  -4   1  -7  161.29    8.25
   4   1   7  156.31    8.35
   4   1   7  151.79   11.48
  -4   1  -7  148.05    9.73
   5  -1   7   13.57    5.79
  -5  -1  -7    9.50    4.91
  -5  -1  -7    5.65    6.45
   5   1   7    5.48    3.71
  -5   1  -7    2.85    3.51
   5   1   7   -4.47    5.80
  -5   1  -7   15.19    5.98
  -6  -1  -7   75.46    9.76
   6  -1   7   85.21   10.23
  -6  -1  -7   76.02    8.63
  -6   1  -7   89.94    8.28
   6   1   7   82.40    7.95
   6   1   7   66.08    9.74
  -6   1  -7   97.11   12.05
   7  -1   7    3.15    9.67
  -7  -1  -7   -2.51    5.33
  -7  -1  -7    7.23    8.80
   7  -1   7   11.52    4.91
   7   1   7    3.23   10.26
  -7   1  -7    8.06    8.28
  -7   1  -7   11.01    5.61
   7   1   7   -1.26    4.65
  -8  -1  -7    3.54    6.83
   8  -1   7   12.53   11.92
  -8  -1  -7   10.15   10.87
   8  -1   7   15.86    6.60
   8   1   7   18.78    6.12
  -8   1  -7   23.24   11.74
   8   1   7   18.92   12.23
  -8   1  -7   13.72    7.78
   9  -2  -7    0.00   10.94
  -9  -2   7   -9.76   12.47
   9  -2  -7    8.78    6.31
  -9  -2   7   18.40    5.55
   9   2  -7   16.42    7.46
   9   2  -7   18.19   11.02
   8  -2  -7   29.83    6.22
   8  -2  -7   25.00   10.02
  -8  -2   7   19.35    8.96
   8  -2  -7   21.69    7.34
   8   2  -7   20.52    9.51
  -8   2   7   44.68   11.10
  -8   2   7   20.34    6.29
   8   2  -7   45.41    7.39
   7  -2  -7   -5.93    4.49
  -7  -2   7    3.94    6.87
   7  -2  -7    2.54    5.35
   7  -2  -7   -0.97    7.72
  -7  -2   7    0.72    3.42
   7   2  -7    4.23    5.04
  -7   2   7    6.45    8.30
  -7   2   7    8.22    4.91
   7   2  -7   -2.83    7.49
   6  -2  -7   32.11    7.67
   6  -2  -7   39.80    6.63
  -6  -2   7   38.51    6.24
   6  -2  -7   33.54    5.02
  -6  -2   7   45.67    4.38
   6   2  -7   32.55    7.48
  -6   2   7   39.08    9.02
   6   2  -7   26.03    4.93
  -6   2   7   22.81    4.56
   5  -2  -7    4.31    5.87
   5  -2  -7    6.06    2.76
   5  -2  -7    3.57    3.87
   5   2  -7   -0.79    4.81
  -5   2   7   -0.44    3.62
   5   2  -7   -1.83    2.99
  -5   2   7   -5.10    4.99
   4  -2  -7  158.77    7.08
   4  -2  -7  154.58    8.61
   4  -2  -7  132.52   11.85
  -4   2   7  154.30    8.54
  -4   2   7  159.89   10.24
   4   2  -7  152.26    7.21
   4   2  -7  150.56    8.38
   3  -2  -7   70.89    4.29
   3  -2  -7   65.16    8.21
   3  -2  -7   64.24    5.84
   3   2  -7   64.37    5.45
  -3   2   7   80.89    8.23
   3   2  -7   67.44    4.09
  -3   2   7   67.77    5.76
   2  -2  -7   14.59    3.00
   2  -2  -7    6.17    5.25
  -2   2   7   12.42    4.53
  -2   2   7    8.04    3.34
   2   2  -7   15.05    2.48
   2   2  -7   10.97    3.54
   1  -2  -7   19.34    4.98
   1  -2  -7   17.82    3.62
  -1   2   7    8.35    4.41
   1   2  -7   13.28    3.58
  -1   2   7   17.02    3.87
   1   2  -7   12.62    2.74
   0  -2  -7  259.34   12.24
   0  -2  -7  268.25   11.05
   0   2   7  265.67   10.68
   0   2  -7  261.29   10.16
   0   2   7  271.61   12.28
   0   2   7  258.53   10.82
  -1  -2  -7   29.50    4.51
   1  -2   7   25.22    2.87
  -1  -2  -7   30.64    5.64
   1   2   7   30.19    5.38
   1   2   7   20.14    3.70
  -1   2  -7   30.79    4.52
  -1   2  -7   30.28    3.31
   2  -2   7   41.03    3.91
  -2  -2  -7   35.18    5.06
  -2  -2  -7   49.91    6.32
  -2   2  -7   39.33    5.22
  -2   2  -7   44.20    3.60
   2   2   7   35.85    5.08
   2   2   7   39.60    6.60
   3  -2   7   45.70    4.48
  -3  -2  -7   48.22    9.88
  -3  -2  -7   31.73    4.60
   3   2   7   39.34    5.56
  -3   2  -7   47.41    5.55
   3   2   7   45.14    7.45
  -3   2  -7   48.60    4.73
  -4  -2  -7   -2.80    6.41
  -4  -2  -7   -1.03    3.65
   4   2   7   -1.00    5.35
  -4   2  -7   -1.01    5.00
  -4   2  -7    6.69    3.52
   4   2   7   -1.49    3.53
   5  -2   7   10.44    5.48
   5  -2   7   13.53    2.73
  -5  -2  -7   15.65    5.38
  -5  -2  -7    9.84    7.95
   5  -2   7   21.01    5.02
   5   2   7   27.02    8.06
   5   2   7   21.01    4.93
  -5   2  -7   23.16    6.51
  -5   2  -7   17.43    4.89
   6  -2   7   23.08    3.94
   6  -2   7   20.77    7.12
  -6  -2  -7   23.05    6.84
  -6  -2  -7   24.88    9.08
   6  -2   7   18.65    5.33
  -6   2  -7   29.81    5.93
   6   2   7   25.50    9.22
   6   2   7   38.20    6.75
  -6   2  -7   29.08    8.75
  -7  -2  -7   24.86   11.44
   7  -2   7   32.90    9.06
   7  -2   7   26.88    7.18
   7  -2   7   21.23    4.94
  -7  -2  -7   28.04    6.16
   7   2   7   34.18   11.93
  -7   2  -7   20.60    6.21
  -7   2  -7   33.20   10.04
   7   2   7   33.34    7.05
   8  -2   7   18.68   12.77
   8  -2   7   -5.92    7.11
  -8  -2  -7   -3.11    8.59
   8  -2   7   13.53    6.13
  -8  -2  -7   26.15   12.57
   8   2   7  -17.05   12.72
   8   2   7    4.32    9.20
  -8   2  -7    1.82    8.41
  -8   2  -7   12.42   10.81
   8  -3  -7    5.53    8.33
   8  -3  -7  -11.77    5.50
   8  -3  -7    0.06   11.36
  -8   3   7    3.42    8.80
   8   3  -7    7.49    6.13
   8   3  -7    7.88   10.42
  -8   3   7   -2.33    8.53
   7  -3  -7  110.29   14.22
   7  -3  -7  106.65    9.65
   7  -3  -7  105.70   10.69
   7   3  -7   92.90   12.67
   7   3  -7   84.22    8.77
  -7   3   7  110.71   15.82
  -7   3   7   99.68   10.73
   6  -3  -7   10.34    7.77
   6  -3  -7    9.88    5.58
   6  -3  -7    7.96    4.38
  -6   3   7   -2.10    7.97
  -6   3   7    8.22    5.84
   6   3  -7    3.60    4.27
   6   3  -7   21.04    7.56
   5  -3  -7   20.10    4.10
   5  -3  -7   14.36    7.24
   5  -3  -7   17.19    5.10
  -5   3   7   22.92    8.89
   5   3  -7   18.80    5.88
  -5   3   7   15.57    5.21
   4  -3  -7   20.50    5.30
   4  -3  -7    4.70    3.26
   4  -3  -7    7.23    6.65
  -4   3   7   -0.70    7.87
   4   3  -7    0.28    4.05
  -4   3   7    3.20    3.83
   3  -3  -7   61.60    6.89
   3  -3  -7   63.36    5.06
   3  -3  -7   80.80    9.35
  -3   3   7   68.85    8.82
   3   3  -7   64.07    5.59
  -3   3   7   62.10    6.65
   2  -3  -7   13.29    3.86
  -2   3   7   10.14    5.21
   2   3  -7    8.86    4.76
  -2   3   7   15.78    6.52
  -2   3   7    2.78    3.62
   1  -3  -7  203.38   11.70
   1  -3  -7  189.62    9.62
  -1   3   7  193.12   10.42
  -1   3   7  192.21    9.73
  -1   3   7  188.93   12.31
   1   3  -7  193.14   10.43
   0  -3  -7    4.25    3.05
   0  -3  -7   -0.76    5.32
   0   3   7    8.71    5.79
   0   3   7    4.23    4.44
   0   3   7    4.03    3.16
   0   3  -7    8.16    4.88
   1  -3   7   -1.34    2.84
  -1  -3  -7    1.96    3.95
   1   3   7    5.69    5.96
   1   3   7    1.40    3.88
   1   3   7    0.94    5.11
  -1   3  -7    5.92    4.39
  -2  -3  -7    1.52    5.84
   2  -3   7    4.76    2.75
  -2  -3  -7   -4.46    4.25
  -2   3  -7    3.21    2.48
  -2   3  -7   -1.69    5.14
  -2   3  -7    2.67    3.08
   2   3   7    6.83    6.82
   2   3   7    0.58    3.44
  -3  -3  -7   73.48    7.74
  -3  -3  -7   81.50   11.19
   3  -3   7   87.86    7.01
  -3   3  -7   76.00    5.61
   3   3   7   85.48    7.82
   3   3   7   75.67   10.89
  -3   3  -7   63.25    7.18
  -4  -3  -7   -6.34    4.02
   4  -3   7   -1.13    4.02
  -4  -3  -7   10.83    8.12
   4   3   7   -9.85    7.92
   4   3   7    4.16    4.28
  -4   3  -7    2.52    5.11
  -4   3  -7    8.20    3.68
   5  -3   7   24.72    4.59
  -5  -3  -7    6.23    4.99
  -5  -3  -7   20.95   10.09
   5   3   7   12.52    8.94
  -5   3  -7    8.85    4.89
   5   3   7   10.46    5.86
  -5   3  -7   23.08    7.44
   6  -3   7   -3.27    5.29
  -6  -3  -7   -1.39   11.14
  -6  -3  -7   20.70    6.67
  -6   3  -7    3.03    7.61
  -6   3  -7   -6.10    5.84
   6   3   7   -6.05   11.08
   6   3   7   -2.34    6.27
   7  -3   7    0.39    7.03
  -7  -3  -7   -5.82    7.38
  -7  -3  -7   14.05   13.30
   7   3   7   -4.35    9.92
  -7   3  -7   -2.23    8.99
   7   3   7    9.52    7.50
  -7   3  -7   11.31    7.41
   6  -4  -7   -3.44    5.32
   6  -4  -7    4.86    7.55
   6  -4  -7   13.04   11.69
  -6   4   7    2.19   11.81
  -6   4   7    4.16    7.58
   6   4  -7   -8.21    7.74
   5  -4  -7    3.66    9.20
   5  -4  -7  -10.28    6.04
   5  -4  -7   -1.37    4.62
  -5   4   7    7.76    6.44
   5   4  -7    6.85    7.00
  -5   4   7    6.54   10.01
   4  -4  -7   32.08    9.01
   4  -4  -7   31.85    6.55
   4   4  -7   38.82    6.15
  -4   4   7   15.61    9.31
  -4   4   7   35.05    7.03
   3  -4  -7   30.98    9.08
   3  -4  -7   29.19    5.99
  -3   4   7   29.26    7.95
  -3   4   7   16.18    7.87
  -3   4   7   31.66    5.71
   3   4  -7   21.53    8.01
   2  -4  -7   25.41    7.83
   2  -4  -7    9.52    5.05
   2   4  -7   19.86    7.85
  -2   4   7   20.64    5.53
  -2   4   7   12.11    7.23
  -2   4   7   24.66    7.56
   1  -4  -7   -5.30    7.47
   1  -4  -7   -0.10    4.70
  -1   4   7    1.18    7.13
  -1   4   7  -12.46    6.30
  -1   4   7    7.99    4.59
   1   4  -7    6.48    7.19
   0  -4  -7   28.26    8.71
   0  -4  -7   14.87    4.91
   0   4   7   24.80    7.17
   0   4  -7   35.35    7.80
   0   4   7   17.56    8.14
   0   4   7   19.79    5.10
  -1  -4  -7   10.47    4.69
  -1  -4  -7    1.78    7.20
   1   4   7    0.92    4.88
   1   4   7   14.41    7.58
   1   4   7    0.53    6.85
  -1   4  -7    9.33    6.96
   2  -4   7   14.70    4.94
  -2  -4  -7    9.28    5.22
  -2  -4  -7    6.44    8.41
   2   4   7   14.28    5.67
   2   4   7    8.04    7.72
  -2   4  -7   13.78    7.92
   2   4   7   11.70    7.82
  -3  -4  -7   44.12    6.40
  -3  -4  -7   37.14    9.32
   3  -4   7   23.84    5.17
   3   4   7   31.95   10.86
  -3   4  -7   34.26    4.31
   3   4   7   24.10    6.82
  -4  -4  -7    6.06   10.18
  -4  -4  -7    5.53    5.48
   4  -4   7    5.67    6.39
   4   4   7   -8.13    9.73
  -4   4  -7   -2.73    5.78
  -4   4  -7   16.88    4.61
   4   4   7   10.40    6.04
  -5  -4  -7   22.84   12.48
   5  -4   7    2.27    5.98
  -5  -4  -7   24.51    8.36
   5   4   7   12.77   12.71
   5   4   7   33.30    8.42
  -5   4  -7   18.86    7.38
  -5   4  -7   10.92    5.70
   4  -5  -7    6.10   11.42
   4  -5  -7    8.03    7.39
   4   5  -7    7.58   11.66
   4   5  -7   14.28    6.02
  -4   5   7   11.84    7.78
  -4   5   7   17.15   10.78
   3  -5  -7   13.20   10.52
   3  -5  -7    2.04    6.30
  -3   5   7    5.43   10.60
   3   5  -7    9.90   11.08
  -3   5   7    6.15    6.63
  -3   5   7    0.61   10.14
   2  -5  -7   44.31    6.37
   2  -5  -7   54.30   11.47
  -2   5   7   32.86   12.15
  -2   5   7   61.13    9.72
   2   5  -7   42.03   10.53
  -2   5   7   45.70   10.69
   1  -5  -7    4.96    5.78
   1  -5  -7   -6.35   10.27
  -1   5   7   -4.16    7.06
  -1   5   7   -9.93    9.07
  -1   5   7    5.44    9.44
   1   5  -7   -2.17    9.35
   0  -5  -7   29.62    5.77
   0  -5  -7   10.58   10.46
   0   5   7   19.54    9.49
   0   5   7   25.01   10.88
   0   5  -7   34.78   10.79
   0   5   7   15.27    7.47
  -1  -5  -7   -1.83    5.42
  -1  -5  -7  -12.59   10.39
   1   5   7   11.77    7.09
  -1   5  -7    8.24   10.44
   1   5   7   -2.87    9.23
   1   5   7   -6.25   10.66
  -2  -5  -7   36.35   11.82
  -2  -5  -7   17.81    6.24
   2   5   7   19.20   10.32
   2   5   7   21.17    8.25
   2   5   7   20.83   10.45
  -2   5  -7   19.63   11.18
  -3  -5  -7  -17.75   11.87
   3  -5   7   -0.31    7.95
  -3  -5  -7    3.17    6.58
  -3   5  -7   -6.96    5.07
   3   5   7  -13.88   12.25
   3   5   7    3.58   10.47
  -3   5  -7    0.66   11.82
   3   5   7   -8.28    7.59
  -9   0   8   13.70    6.35
   9   0  -8   10.76   10.43
   9   0  -8    2.25    8.14
  -9   0   8   10.78   13.86
   8   0  -8    3.06    8.88
   8   0  -8    6.29    5.69
  -8   0   8   10.52    5.51
  -8   0   8    0.11   10.12
   7   0  -8   -1.52    6.92
   7   0  -8   -0.72    4.64
  -7   0   8    9.28    3.90
   6   0  -8   72.39    9.93
  -6   0   8   83.35    6.66
   6   0  -8   73.31    7.23
  -5   0   8   -1.61    2.53
   5   0  -8    1.21    5.92
  -5   0   8   -0.51    4.60
   5   0  -8   -0.80    2.72
   4   0  -8   27.01    3.94
  -4   0   8   29.53    3.85
  -4   0   8   28.60    5.41
   4   0  -8   32.33    6.69
  -3   0   8   -0.66    3.64
   3   0  -8   -0.20    4.47
  -3   0   8    4.50    2.54
   3   0  -8    1.76    2.27
   2   0  -8  187.11    8.19
   2   0  -8  185.71    9.42
  -2   0   8  185.08    7.67
  -2   0   8  199.81    9.11
   1   0  -8    0.98    4.07
  -1   0   8    3.99    3.32
  -1   0   8    1.70    1.83
   1   0  -8    1.06    2.20
   0   0  -8  318.43   12.65
   0   0  -8  330.27   11.88
   0   0   8  334.16   11.26
   0   0   8  322.20   12.19
  -1   0  -8    2.16    2.45
   1   0   8    2.51    3.58
  -1   0  -8   -0.22    3.61
   1   0   8   -1.16    1.83
   2   0   8   28.26    5.38
  -2   0  -8   27.55    5.78
   2   0   8   31.15    4.14
  -2   0  -8   34.82    4.75
   3   0   8   -2.53    2.28
   3   0   8   -2.01    4.39
  -3   0  -8   -0.14    5.30
  -3   0  -8    1.14    3.59
   4   0   8   83.81    8.97
   4   0   8   86.47    6.00
  -4   0  -8   84.39    9.77
  -4   0  -8   84.63    7.00
  -5   0  -8    4.28    7.71
  -5   0  -8    1.63    4.58
   5   0   8    4.11    3.43
   6   0   8   63.52    7.21
  -6   0  -8   64.83   10.07
  -6   0  -8   43.96    6.16
   6   0   8   49.06    9.77
  -7   0  -8    9.08    9.95
  -7   0  -8    4.74    5.62
   7   0   8    5.90   10.21
   7   0   8    1.63    4.55
   8   0   8   13.75   13.96
  -8   0  -8   30.20   12.10
  -8   0  -8    1.76    8.09
  -9  -1   8   37.84    6.60
   9  -1  -8   42.93    9.60
   9  -1  -8   30.20   10.88
  -9  -1   8   40.06   13.43
   9   1  -8   41.55    8.04
  -9   1   8   23.63    6.35
   9   1  -8   27.25   11.86
  -8  -1   8    2.89    9.93
   8  -1  -8    3.60   10.87
   8  -1  -8    2.46    5.85
  -8  -1   8    2.35    4.30
   8   1  -8    6.55    8.80
  -8   1   8    5.91    4.79
   8   1  -8   -2.55    5.56
  -7  -1   8   26.58    8.50
  -7  -1   8   36.95    5.03
   7  -1  -8   32.22    6.14
   7  -1  -8   33.40    9.13
   7   1  -8   22.01    7.68
  -7   1   8   14.23    6.69
   7   1  -8   31.78    5.54
  -7   1   8   41.86    6.21
   6  -1  -8   10.18    7.58
  -6  -1   8   11.85    3.21
   6  -1  -8   10.62    3.96
  -6  -1   8    9.14    6.28
   6   1  -8    8.89    4.26
   6   1  -8   16.88    6.45
  -6   1   8    4.57    5.89
  -6   1   8   13.90    4.27
  -5  -1   8   67.14    8.55
  -5  -1   8   60.12    4.89
   5  -1  -8   66.63    9.51
   5  -1  -8   66.85    6.61
   5   1  -8   72.59    6.04
  -5   1   8   71.98    9.14
   5   1  -8   59.60   11.01
  -5   1   8   71.83    6.33
   4  -1  -8   53.74    4.09
  -4  -1   8   70.41    4.25
   4  -1  -8   51.91    7.97
   4  -1  -8   67.72    6.27
  -4   1   8   70.75    5.72
  -4   1   8   79.01    8.97
   4   1  -8   68.82    7.43
   4   1  -8   65.37    5.52
  -3  -1   8  118.36    5.01
   3  -1  -8  117.07    9.25
   3  -1  -8  131.66    7.49
   3   1  -8  106.74    6.07
  -3   1   8  123.18    8.92
   3   1  -8  122.31    7.63
  -3   1   8  117.17    6.73
  -2  -1   8    8.52    1.53
   2  -1  -8    5.90    4.80
  -2   1   8    6.89    2.66
   2   1  -8    7.00    2.16
  -2   1   8    9.15    4.53
   2   1  -8    2.73    3.69
   1  -1  -8   -4.23    4.11
   1  -1  -8   -1.64    2.33
  -1   1   8    3.35    2.09
   1   1  -8    1.67    1.93
  -1   1   8    1.64    3.72
   1   1  -8    0.11    3.10
   0  -1  -8   -1.77    4.46
   0  -1  -8    3.03    2.87
   0   1   8    2.39    3.58
   0   1   8    4.75    2.42
   0   1  -8    0.21    1.98
   0   1  -8    1.07    3.35
   1  -1   8  148.33    6.64
  -1  -1  -8  143.89    7.79
   1  -1   8  150.92    5.55
   1  -1   8  141.53    5.26
  -1  -1  -8  147.72    9.60
  -1   1  -8  138.97    6.71
  -1   1  -8  146.56    8.05
   1   1   8  137.39    7.16
   1   1   8  134.08    9.01
   2  -1   8   29.31    4.34
  -2  -1  -8   28.54    6.29
  -2  -1  -8   23.01    3.79
   2  -1   8   28.69    3.07
   2  -1   8   28.22    2.79
  -2   1  -8   39.46    4.59
   2   1   8   22.54    5.27
  -2   1  -8   37.51    5.39
   2   1   8   21.95    3.46
   3  -1   8   87.13    7.20
  -3  -1  -8   90.41    9.69
   3  -1   8   78.52    5.41
  -3  -1  -8   95.20    7.35
  -3   1  -8  114.11    6.83
   3   1   8   96.57    6.52
   3   1   8   90.33    9.19
  -3   1  -8   95.98    8.42
  -4  -1  -8   10.72    6.13
  -4  -1  -8    3.27    3.99
   4  -1   8    6.08    4.91
   4   1   8    8.44    3.55
   4   1   8    1.78    5.20
  -4   1  -8   14.01    3.73
  -5  -1  -8   -6.37    6.92
  -5  -1  -8   -0.75    3.92
   5  -1   8   -0.42    5.82
   5   1   8    2.59    4.48
  -5   1  -8   -2.06    4.03
  -5   1  -8    7.06    7.18
   5   1   8   -6.33    5.88
  -6  -1  -8   62.74    8.71
   6  -1   8   56.06    9.35
  -6  -1  -8   53.54    9.49
  -6   1  -8   67.64    9.97
   6   1   8   52.71    7.54
  -6   1  -8   65.16    7.92
   6   1   8   39.22    8.25
  -7  -1  -8   24.46    9.91
  -7  -1  -8   15.38    7.46
   7  -1   8   28.83    9.90
   7  -1   8   32.16    5.96
  -7   1  -8   35.42   11.13
  -7   1  -8   30.70    7.67
   7   1   8   25.40   11.11
   7   1   8   22.46    6.51
  -8  -1  -8   18.81    8.10
   8  -1   8   33.75   12.77
  -8  -1  -8   23.35   12.34
   8  -1   8   13.79    7.01
  -8   1  -8   10.04   11.58
   8   1   8   13.57    6.70
   8   1   8   38.31   13.56
  -8   1  -8    4.68    7.33
   8  -2  -8   27.35    6.13
   8  -2  -8    3.43    9.98
  -8  -2   8   13.93    4.71
  -8  -2   8   11.35    9.67
   8  -2  -8   13.89    6.71
   8   2  -8   26.56   10.29
  -8   2   8   34.34   11.49
  -8   2   8   15.84    6.94
   8   2  -8   20.13    6.33
   7  -2  -8   77.71    9.64
   7  -2  -8   55.43   10.18
  -7  -2   8   62.25    5.84
   7  -2  -8   61.89    7.04
  -7  -2   8   56.98    8.20
  -7   2   8   62.25    8.56
   7   2  -8   62.72    8.24
  -7   2   8   44.69    8.49
   7   2  -8   52.13    8.88
  -6  -2   8   16.76    3.02
   6  -2  -8    5.57    7.01
   6  -2  -8   14.87    5.36
   6  -2  -8   15.36    3.86
  -6  -2   8   16.86   10.57
  -6   2   8    8.60    4.46
   6   2  -8   33.38    7.15
   6   2  -8   15.25    4.60
  -6   2   8   10.27    6.55
   5  -2  -8   48.39    6.90
   5  -2  -8   40.00    5.03
   5  -2  -8   41.16    8.09
   5   2  -8   50.39    5.74
  -5   2   8   62.51   10.39
  -5   2   8   54.05    7.01
   5   2  -8   47.35    6.54
   4  -2  -8    8.78    2.44
   4  -2  -8    4.10    4.84
   4  -2  -8    0.12    3.27
   4   2  -8    1.45    4.21
   4   2  -8    5.78    2.90
  -4   2   8   11.11    3.66
  -4   2   8    3.14    6.42
   3  -2  -8   19.58    2.95
   3  -2  -8   12.33    3.38
   3  -2  -8   18.32    6.23
  -3   2   8   15.16    3.62
   3   2  -8   12.77    3.89
  -3   2   8   18.24    6.09
   3   2  -8   18.62    3.19
   2  -2  -8   22.41    3.80
   2   2  -8   34.18    4.70
   2   2  -8   21.34    3.05
   2   2  -8   31.81    4.22
   1  -2  -8   41.46    5.03
   1  -2  -8   47.88    7.03
   1   2  -8   47.53    4.72
   1   2  -8   34.72    3.08
  -1   2   8   40.01    4.99
  -1   2   8   43.62    5.28
   1   2  -8   45.11    5.05
  -1   2   8   33.43    5.64
   0  -2  -8   15.01    3.16
   0  -2  -8   14.98    5.40
   0   2  -8   24.46    3.54
   0   2   8   13.67    5.39
   0   2  -8   16.13    2.36
   0   2   8   22.06    4.20
   0   2  -8   15.79    3.96
   1  -2   8   30.98    3.45
  -1  -2  -8   24.56    4.64
  -1   2  -8   30.77    4.20
   1   2   8   23.63    4.15
  -1   2  -8   26.75    2.88
  -2  -2  -8    2.36    5.39
   2  -2   8   -1.22    2.46
  -2  -2  -8    0.59    3.42
  -2   2  -8    0.80    3.57
   2   2   8    5.56    5.49
  -2   2  -8    3.91    2.79
   2   2   8   -2.43    2.96
   3  -2   8   25.31    4.16
  -3  -2  -8   30.47    5.51
  -3  -2  -8   24.81    6.71
  -3   2  -8   29.69    3.99
   3   2   8   31.96    7.00
  -3   2  -8   30.78    5.65
   3   2   8   15.16    3.78
  -4  -2  -8   17.68    5.66
  -4  -2  -8   18.04    8.80
   4  -2   8   23.26    4.18
  -4   2  -8    3.75    3.70
  -4   2  -8   15.51    5.74
   4   2   8    7.39    6.54
   4   2   8   12.28    4.18
  -5  -2  -8  112.82   14.00
   5  -2   8  103.79    9.90
   5  -2   8  117.65    8.45
  -5  -2  -8   98.71    9.50
   5  -2   8  112.94    6.00
  -5   2  -8  119.34   11.30
   5   2   8   96.19   13.03
   5   2   8  102.65    9.14
  -5   2  -8  111.78    8.94
  -6  -2  -8   20.12    6.09
   6  -2   8    1.06    4.93
   6  -2   8    7.60    3.75
  -6  -2  -8   -8.55    8.97
   6  -2   8   -3.60    6.47
  -6   2  -8    7.32    8.76
   6   2   8    4.04    5.67
   6   2   8   18.08   10.89
  -6   2  -8   11.72    5.66
  -7  -2  -8   12.96    8.06
   7  -2   8    6.55    8.98
   7  -2   8    1.42    5.08
  -7  -2  -8    1.33   10.91
   7  -2   8   -6.28    6.52
  -7   2  -8   -9.24    9.24
   7   2   8   14.17    9.76
  -7   2  -8   -8.23    6.96
   7   2   8   -3.06    5.87
   7  -3  -8    2.42    5.18
   7  -3  -8    5.14    7.17
   7  -3  -8    1.47   11.74
  -7   3   8   -2.12   10.82
  -7   3   8   -0.89    6.48
   7   3  -8    8.49    5.66
   7   3  -8  -10.41    8.38
   6  -3  -8   20.56    8.58
   6  -3  -8   17.85    6.57
   6  -3  -8   24.57    5.45
  -6   3   8   25.88   10.56
  -6   3   8    7.97    6.17
   6   3  -8   26.01    7.93
   6   3  -8   28.70    4.95
   5  -3  -8   -4.10    7.03
   5  -3  -8    6.43    3.47
   5  -3  -8    7.52    5.08
  -5   3   8   -3.05    6.78
  -5   3   8    0.32    5.25
   5   3  -8    6.35    4.03
   5   3  -8   -1.57    5.65
   4  -3  -8   68.05    5.89
   4  -3  -8   75.46    8.17
   4  -3  -8   83.47   11.92
  -4   3   8   62.32    7.70
  -4   3   8   88.85   12.03
   4   3  -8   70.74    7.68
   4   3  -8   78.64    5.52
   3  -3  -8   -2.10    4.40
   3  -3  -8    1.26    6.24
   3   3  -8    1.56    3.68
   3   3  -8    0.45    2.49
  -3   3   8    2.01    4.02
   3   3  -8    0.80    5.38
  -3   3   8  -12.51    7.80
   2  -3  -8   36.80    7.09
   2  -3  -8   44.65    6.45
  -2   3   8   37.56    5.43
   2   3  -8   44.47    6.34
  -2   3   8   43.93    6.59
  -2   3   8   42.61    9.10
   1  -3  -8   19.51    5.97
   1  -3  -8   18.95    5.29
  -1   3   8   19.90    5.49
  -1   3   8   27.06    7.40
   1   3  -8   19.48    5.31
  -1   3   8   19.36    4.31
   0  -3  -8   15.27    5.01
   0  -3  -8    7.94    5.79
   0   3  -8   15.96    5.14
   0   3   8    6.23    6.85
   0   3   8    7.93    3.95
   0   3   8   11.23    5.07
  -1  -3  -8    5.29    4.83
  -1  -3  -8    3.29    6.88
   1   3   8    4.11    7.12
   1   3   8    9.82    4.10
   1   3   8    7.35    5.30
  -1   3  -8    4.61    4.95
   2  -3   8  105.60    7.13
  -2  -3  -8   94.89    8.27
  -2  -3  -8   97.71   11.85
  -2   3  -8   78.81    5.37
   2   3   8  111.13   12.24
   2   3   8  102.83    8.23
  -2   3  -8   85.26    7.08
   3  -3   8   -1.92    3.88
  -3  -3  -8   -4.35    4.15
  -3  -3  -8    0.42    7.71
   3   3   8    1.01    3.99
  -3   3  -8    1.40    5.11
  -3   3  -8    3.86    3.42
   3   3   8    4.08    7.08
  -4  -3  -8   20.46    8.45
   4  -3   8   40.25    5.89
  -4  -3  -8   34.30    6.44
  -4   3  -8   32.12    6.56
   4   3   8   30.81    7.00
  -4   3  -8   23.05    4.67
   4   3   8   11.19    7.60
  -5  -3  -8    5.08    6.38
  -5  -3  -8   15.66   10.70
   5  -3   8    0.09    4.80
  -5   3  -8    6.17    7.39
   5   3   8    4.60    5.74
   5   3   8   -5.54    9.27
  -5   3  -8    8.48    5.00
   6  -3   8   42.55    8.06
  -6  -3  -8   25.63   12.76
  -6  -3  -8   33.75    7.34
   6   3   8   10.13    6.75
  -6   3  -8   22.74    6.53
   6   3   8   29.15   10.79
  -6   3  -8   26.08    9.20
   6  -4  -8   29.07   12.44
   6  -4  -8   24.37    6.07
   6  -4  -8   21.57    8.63
  -6   4   8   32.36   12.01
   6   4  -8   31.16    8.98
   6   4  -8   24.67    5.45
  -6   4   8   21.52    7.30
   5  -4  -8   13.26    7.19
   5  -4  -8   15.53    4.78
   5  -4  -8   17.68   10.77
   5   4  -8   21.93    8.39
  -5   4   8   12.46    6.94
  -5   4   8   36.18   10.10
   4  -4  -8   14.80    5.72
   4  -4  -8   -8.20    4.05
   4  -4  -8    3.79    9.21
  -4   4   8    9.88    9.08
   4   4  -8    2.53    5.38
   4   4  -8   -1.82    8.17
  -4   4   8    9.89    5.69
   3  -4  -8   26.49    6.48
   3  -4  -8   14.28    9.97
  -3   4   8   -5.03    8.64
  -3   4   8    6.99    7.85
  -3   4   8   10.37    5.43
   3   4  -8    5.02    7.37
   2  -4  -8  106.01    8.98
   2  -4  -8  125.81   14.15
   2   4  -8  117.97   12.39
  -2   4   8  136.50   12.60
  -2   4   8  111.81    9.89
  -2   4   8  107.12   13.16
   1  -4  -8   10.29    8.13
   1  -4  -8   11.46    4.97
  -1   4   8   20.00    8.29
  -1   4   8   14.93    4.95
  -1   4   8   23.98    7.97
   1   4  -8   16.29    7.28
   0  -4  -8   15.06    5.19
   0  -4  -8   17.90    9.43
   0   4  -8    8.72    7.18
   0   4   8   18.41    7.52
   0   4   8   22.23    5.71
   0   4   8   22.59    9.23
  -1  -4  -8    2.67    8.75
  -1  -4  -8   12.18    5.10
   1   4   8    3.91    7.07
   1   4   8    3.75    4.88
   1   4   8    9.17   10.20
  -1   4  -8    9.37    7.39
   2  -4   8    0.82    4.97
  -2  -4  -8    1.07    4.87
  -2  -4  -8   -5.36    9.37
   2   4   8    2.98    8.04
   2   4   8    2.74    8.42
  -2   4  -8   -3.27    8.05
   2   4   8    0.91    6.13
  -2   4  -8    9.62    4.50
  -3  -4  -8    7.47    5.63
  -3  -4  -8   19.10   10.44
   3  -4   8    4.37    5.24
   3   4   8    7.92   10.74
   3   4   8   18.83    6.07
  -3   4  -8   -1.24    3.88
  -3   4  -8   16.18    5.34
  -4  -4  -8   47.88    8.12
  -4  -4  -8   50.51   12.68
   4  -4   8   66.57    9.50
   4   4   8   61.47    9.43
   4   4   8   38.38   11.00
  -4   4  -8   68.01    7.75
   5  -4   8   56.48    8.83
  -5  -4  -8   32.74    8.05
  -5  -4  -8   51.65   12.71
   5   4   8   57.14   14.51
   5   4   8   53.71    9.93
  -5   4  -8   45.45    9.52
  -5   4  -8   47.73    7.02
   3  -5  -8   41.78    7.69
   3  -5  -8   49.24   11.86
  -3   5   8   45.77    8.33
  -3   5   8   38.28   10.94
  -3   5   8   54.23   13.11
   3   5  -8   36.94   11.08
   2  -5  -8    6.94   12.51
   2  -5  -8   -4.47    6.62
  -2   5   8   -3.75    7.26
   2   5  -8    1.47   10.17
  -2   5   8   10.61    9.71
  -2   5   8   -2.86    9.69
   1  -5  -8   -6.25   12.10
   1  -5  -8   17.62    6.84
   1   5  -8   -4.22   10.83
  -1   5   8   11.48    7.24
  -1   5   8   12.24   11.15
  -1   5   8    6.13   10.78
   0  -5  -8   16.92    6.74
   0  -5  -8    1.06   12.08
   0   5  -8    3.88   10.64
   0   5   8   19.30    9.94
   0   5   8   15.28    7.07
   0   5   8    1.18   10.34
  -1  -5  -8   81.53   10.36
  -1  -5  -8   87.02   15.00
   1   5   8   57.15   11.74
   1   5   8   75.28    9.78
   1   5   8   82.57   13.39
  -1   5  -8   77.21   13.11
  -2  -5  -8   20.38   12.38
  -2  -5  -8   36.72    8.05
  -2   5  -8   33.93   12.14
   2   5   8   31.62    9.36
   2   5   8   34.96   12.33
  -9   0   9   59.69    8.65
  -9   0   9   85.25   15.34
   9   0  -9   58.94   10.64
   9   0  -9   29.22   11.17
   8   0  -9   -5.47   10.14
  -8   0   9   -1.83    4.92
  -8   0   9   13.65   11.04
   8   0  -9    2.26    5.80
   7   0  -9   21.12    7.98
  -7   0   9   30.15    4.94
   6   0  -9   -4.71    6.39
  -6   0   9    1.51    4.24
   6   0  -9    3.59    4.41
  -5   0   9   28.09    6.22
  -5   0   9   25.11    3.69
   5   0  -9   31.71    5.78
   5   0  -9   29.05    7.44
  -4   0   9    3.85    5.18
   4   0  -9    2.93    3.07
  -4   0   9    1.34    2.65
  -3   0   9   35.87    4.02
  -3   0   9   64.35    7.10
   3   0  -9   42.52    4.85
   3   0  -9   40.76    6.12
  -2   0   9    1.16    4.22
   2   0  -9   -2.56    4.04
  -2   0   9    1.59    2.17
   2   0  -9    2.93    2.34
   1   0  -9    6.51    4.13
  -1   0   9    3.74    3.71
   1   0  -9    3.51    2.64
  -1   0   9    9.05    2.43
   0   0   9    0.62    3.68
   0   0  -9   -1.97    2.24
   0   0   9    6.40    2.20
   0   0  -9   -1.45    3.76
   1   0   9  121.87    6.10
   1   0   9  125.58    8.50
  -1   0  -9  121.14    9.10
  -1   0  -9  127.38    7.05
  -2   0  -9    0.73    4.93
  -2   0  -9    0.62    2.77
   2   0   9   -0.48    2.20
   2   0   9    5.23    4.52
  -3   0  -9   83.83   10.13
  -3   0  -9   97.70    7.40
   3   0   9  105.08    6.16
   3   0   9  103.72    9.05
  -4   0  -9   -6.82    5.57
   4   0   9   -2.16    3.13
   4   0   9   -8.30    6.81
  -4   0  -9    5.31    3.77
   5   0   9   15.27    7.33
   5   0   9    8.58    4.45
  -5   0  -9    1.98    6.71
  -5   0  -9    5.45    4.74
   6   0   9   18.65    9.34
  -6   0  -9    3.81    6.00
   6   0   9    6.56    4.61
  -6   0  -9    4.90    9.69
   7   0   9   23.31    6.88
   7   0   9   25.62   11.10
  -7   0  -9   42.83    8.60
  -7   0  -9   30.28   10.87
  -8  -1   9   17.24    5.14
   8  -1  -9   25.23    6.99
  -8  -1   9   13.99   11.69
   8  -1  -9   20.26   10.34
   8   1  -9   28.80    9.38
  -8   1   9   21.16    6.00
   8   1  -9   24.24    7.20
   7  -1  -9   34.16    9.03
  -7  -1   9   49.27    6.72
   7  -1  -9   48.30    8.34
  -7  -1   9   49.90   10.01
   7   1  -9   46.00    6.57
  -7   1   9   33.92    6.01
   7   1  -9   31.69    8.51
  -7   1   9   46.05    9.11
   6  -1  -9   76.82   11.10
   6  -1  -9   69.52    7.97
  -6  -1   9   46.53    5.59
  -6   1   9   75.05   10.42
   6   1  -9   43.19    5.44
  -6   1   9   51.91    6.90
   6   1  -9   49.14    7.89
  -5  -1   9   43.79    4.65
   5  -1  -9   58.57    7.04
   5  -1  -9   42.22    7.75
  -5  -1   9   65.22    7.77
   5  -1  -9   41.03    4.63
   5   1  -9   42.19    5.80
   5   1  -9   63.24    8.13
  -5   1   9   46.55    6.47
  -5   1   9   51.12    8.11
   4  -1  -9    4.85    6.68
  -4  -1   9    6.17    2.37
   4  -1  -9    1.45    3.45
   4   1  -9   16.49    3.88
   4   1  -9    6.06    4.66
  -4   1   9    8.20    3.56
   3  -1  -9    6.19    3.39
   3  -1  -9   10.94    5.61
  -3  -1   9   10.07    2.18
  -3   1   9   17.18    3.69
   3   1  -9    7.11    2.84
  -3   1   9   17.25    5.78
   3   1  -9   10.46    4.48
   2  -1  -9   38.21    6.95
   2  -1  -9   33.34    5.23
  -2  -1   9   28.46    2.78
   2   1  -9   29.45    5.01
  -2   1   9   40.40    6.59
   2   1  -9   35.84    4.20
  -2   1   9   41.59    4.83
   1  -1  -9   36.90    4.78
  -1  -1   9   35.76    2.70
   1  -1  -9   41.32    6.67
  -1   1   9   35.26    4.47
  -1   1   9   38.90    6.66
   1   1  -9   32.62    3.96
   1   1  -9   35.95    5.25
   0  -1  -9  170.97   10.57
   0  -1  -9  183.56    8.90
   0  -1   9  164.29    6.02
   0  -1   9  169.65    7.30
   0   1   9  172.83   10.33
   0   1  -9  175.79    7.68
   0   1  -9  165.77    8.86
   0   1   9  166.51    8.13
   1  -1   9   27.29    2.75
  -1  -1  -9   26.43    5.20
   1  -1   9   29.63    4.15
  -1  -1  -9   33.44   10.64
   1   1   9   27.75    3.40
  -1   1  -9   35.23    4.35
   1   1   9   22.49    5.52
  -1   1  -9   28.84    4.87
   2  -1   9    2.19    2.10
   2  -1   9    1.68    1.94
  -2  -1  -9    4.80    6.07
  -2  -1  -9   -7.72    3.72
   2   1   9    0.10    4.95
   2   1   9   -4.29    2.93
  -2   1  -9   -3.21    2.86
  -2   1  -9    1.30    4.66
   3  -1   9    8.34    4.45
  -3  -1  -9    0.70    3.39
  -3  -1  -9   15.09    6.59
   3  -1   9    9.78    2.62
   3  -1   9   10.71    2.70
  -3   1  -9   14.77    4.01
   3   1   9    6.85    3.50
  -3   1  -9   20.53    6.00
  -4  -1  -9   66.32    9.10
  -4  -1  -9   65.06    7.66
   4  -1   9   61.79    5.73
   4  -1   9   68.66    8.80
   4   1   9   51.74    7.60
  -4   1  -9   69.23    7.27
  -4   1  -9   65.55    7.88
   4   1   9   67.03    6.84
  -5  -1  -9    3.32    8.88
   5  -1   9   -2.66    6.62
  -5  -1  -9   -0.75    4.46
   5   1   9    3.73    4.52
  -5   1  -9  -11.31    4.74
  -5   1  -9    0.10    7.83
   5   1   9    1.10    7.04
  -6  -1  -9   89.28   11.56
   6  -1   9   74.09   11.66
  -6  -1  -9   78.13   10.45
   6   1   9   66.06    9.84
   6   1   9   77.85    9.47
  -6   1  -9   92.25    9.81
  -6   1  -9  103.53   12.14
   7  -1   9   -2.47    9.89
  -7  -1  -9   16.28    7.04
  -7  -1  -9    2.98   10.39
  -7   1  -9    3.30    6.47
   7   1   9    5.17   11.00
   7   1   9   17.27    7.10
  -7   1  -9   13.57   10.65
   8  -2  -9   62.18    7.68
   8  -2  -9   33.71   10.98
   8  -2  -9   67.36   10.61
  -8  -2   9   57.98    7.58
  -8  -2   9   50.04   10.66
  -8   2   9   72.19   10.18
   8   2  -9   41.79   12.40
   8   2  -9   79.24   10.60
  -8   2   9   36.10   10.08
  -7  -2   9   16.04    7.28
  -7  -2   9    6.06    3.95
   7  -2  -9   25.18   10.66
   7  -2  -9   10.63    4.34
   7  -2  -9    1.02    5.59
  -7   2   9   -4.66    4.88
  -7   2   9    3.78   10.54
   7   2  -9   10.55    5.22
   7   2  -9   16.61    8.85
   6  -2  -9   -6.16    8.38
   6  -2  -9    6.58    4.67
   6  -2  -9   -4.86    3.26
   6   2  -9    2.41    6.32
   6   2  -9    7.63    4.54
  -6   2   9   12.65    8.91
  -6   2   9    4.59    4.59
   5  -2  -9   -0.10    2.86
   5  -2  -9    8.33    5.52
   5  -2  -9    3.77    6.47
   5   2  -9   -1.55    3.70
  -5   2   9    3.87    6.97
  -5   2   9   -2.40    4.16
   4  -2  -9   60.93    4.65
   4  -2  -9   63.31    9.15
   4  -2  -9   59.65    6.85
  -4   2   9   82.07   10.65
   4   2  -9   62.06    5.47
  -4   2   9   59.29    6.93
   4   2  -9   56.39    7.69
   3  -2  -9   39.72    6.52
   3  -2  -9   26.34    7.33
  -3   2   9   39.74    8.68
  -3   2   9   29.38    5.19
   3   2  -9   25.25    4.76
   3   2  -9   25.78    3.38
   2  -2  -9   28.61    6.08
   2  -2  -9   23.24    4.46
  -2   2   9   33.90    4.71
  -2   2   9   31.51    7.35
   2   2  -9   38.44    5.03
   2   2  -9   34.36    3.85
   2   2  -9   33.33    5.03
   1  -2  -9    9.72    3.49
   1  -2  -9    6.70    5.29
  -1   2   9   11.90    5.25
   1   2  -9   13.91    4.10
   1   2  -9   14.75    2.21
   1   2  -9   14.64    3.93
  -1   2   9    7.49    3.15
   0  -2  -9    7.85    3.41
   0  -2  -9   12.66    5.92
   0   2   9    7.63    4.02
   0   2  -9   12.06    2.42
   0   2   9   12.81    5.76
   0   2  -9    2.21    3.93
   0   2   9   14.44    4.08
   0   2  -9   10.75    4.09
  -1  -2  -9   -0.21    5.00
  -1  -2  -9    4.46    4.49
   1  -2   9    1.69    2.24
   1   2   9   -5.59    3.65
  -1   2  -9    4.74    2.75
  -1   2  -9    3.65    4.17
   1   2   9    6.73    5.72
  -2  -2  -9   73.74    9.97
  -2  -2  -9   61.15    7.25
   2  -2   9   63.84    5.16
  -2   2  -9   59.69    5.49
  -2   2  -9   60.96    7.30
   2   2   9   54.10    6.84
   2   2   9   90.04   10.84
  -3  -2  -9   34.23    6.21
  -3  -2  -9   32.97    7.65
   3   2   9   24.98    7.35
  -3   2  -9   22.39    6.02
   3   2   9   42.18    6.50
  -3   2  -9   40.68    5.76
   4  -2   9    9.32    3.68
  -4  -2  -9   12.42    8.05
  -4  -2  -9    0.91    5.06
  -4   2  -9    7.76    6.49
   4   2   9   -3.60    8.22
  -4   2  -9   10.95    4.33
   4   2   9    5.81    4.14
  -5  -2  -9    9.51    6.74
   5  -2   9    0.93    3.06
  -5  -2  -9    6.83    9.62
   5  -2   9    6.45    4.40
  -5   2  -9   -1.01    7.43
  -5   2  -9   -0.86    5.12
   5   2   9   11.30    7.88
   5   2   9   11.81    5.50
   6  -2   9    9.54    4.15
   6  -2   9   -3.22    7.35
  -6  -2  -9    4.86   11.64
  -6  -2  -9   -8.91    6.84
   6  -2   9   -1.96    5.11
   6   2   9   -4.84    5.87
  -6   2  -9   -5.66    8.23
  -6   2  -9    8.35    5.64
   6   2   9   -0.48    9.27
  -7  -2  -9    9.40    9.96
  -7  -2  -9    5.40   11.92
   7  -2   9   -1.23    9.63
   7  -2   9   -2.96    6.73
   7  -2   9   14.95    5.31
  -7   2  -9    3.81    7.63
  -7   2  -9    2.43   10.17
   7   2   9   21.72    7.74
   7   2   9   -3.80   11.51
   7  -3  -9   42.45   11.48
   7  -3  -9   52.34    8.66
   7  -3  -9   65.50    8.33
   7   3  -9   47.50    6.63
   7   3  -9   50.00    9.95
  -7   3   9   40.15    9.87
  -7   3   9   79.42   10.99
   6  -3  -9    0.59    8.82
   6  -3  -9    6.47    6.84
   6  -3  -9    8.69    4.18
  -6   3   9   -0.76    9.58
  -6   3   9   12.99    5.83
   6   3  -9    7.01    7.29
   6   3  -9   -4.03    4.64
   5  -3  -9    9.48    8.00
   5  -3  -9   23.99    6.46
   5  -3  -9    4.12    4.00
  -5   3   9   11.01    5.51
   5   3  -9    5.48    4.04
  -5   3   9    8.57    7.65
   4  -3  -9   15.55    7.37
   4  -3  -9   17.59    5.98
   4  -3  -9   21.08    3.76
   4   3  -9   30.41    4.06
   4   3  -9   22.60    5.61
  -4   3   9   34.92   10.64
  -4   3   9   24.33    5.38
   3  -3  -9    4.50    4.33
   3  -3  -9   -4.03    7.66
   3   3  -9    1.95    2.77
   3   3  -9   -1.18    4.05
  -3   3   9    1.01    6.70
  -3   3   9    1.07    4.63
   3   3  -9    3.83    5.88
   2  -3  -9    9.38    7.13
   2  -3  -9    6.55    4.52
  -2   3   9   -2.47    5.25
  -2   3   9    1.96    4.97
  -2   3   9   -2.69    6.48
   2   3  -9    2.87    5.36
   1  -3  -9  123.36   12.71
   1  -3  -9  139.55    9.37
  -1   3   9  140.40    9.93
  -1   3   9  147.20    9.69
   1   3  -9  139.41   10.11
  -1   3   9  122.68   12.60
   0  -3  -9   19.11    8.20
   0  -3  -9   13.76    4.51
   0   3   9   26.74    7.79
   0   3  -9   21.31    5.89
   0   3   9   18.55    5.61
   0   3   9   19.16    6.02
  -1  -3  -9   25.12    8.04
  -1  -3  -9   30.40    5.16
  -1   3  -9   41.27    5.02
  -1   3  -9   32.82    6.59
   1   3   9   33.03    5.82
   1   3   9   43.87    6.85
   1   3   9   45.55   10.23
   2  -3   9    7.30    3.89
  -2  -3  -9   24.64    6.20
  -2  -3  -9   11.42    7.95
   2   3   9   13.10    8.87
  -2   3  -9   10.62    3.33
   2   3   9   21.11    4.88
  -2   3  -9    8.11    4.94
  -3  -3  -9    9.57    4.77
   3  -3   9   23.31    5.08
  -3  -3  -9   18.95    8.09
  -3   3  -9    8.30    3.75
   3   3   9    9.18    8.55
  -3   3  -9   12.22    6.10
   3   3   9    9.56    5.46
  -4  -3  -9   11.83    6.04
   4  -3   9    3.12    4.26
  -4  -3  -9    9.92    9.07
   4   3   9   19.20   10.33
  -4   3  -9    8.31    8.73
   4   3   9    7.80    5.30
  -4   3  -9    4.88    4.56
  -5  -3  -9   48.53   12.33
  -5  -3  -9   50.85    7.84
   5  -3   9   52.42    6.74
  -5   3  -9   52.14   10.02
   5   3   9   56.83    7.22
   5   3   9   35.38   10.00
  -5   3  -9   64.53    8.52
  -6  -3  -9    0.85   12.64
   6  -3   9   -0.39    6.93
  -6  -3  -9   14.19    7.25
   6   3   9   10.81   11.50
   6   3   9    5.16    7.49
  -6   3  -9   21.32    9.85
  -6   3  -9    1.08    6.88
   5  -4  -9   15.40   10.39
   5  -4  -9   28.33    8.56
   5  -4  -9    0.75    4.78
   5   4  -9   18.57    4.92
  -5   4   9    4.00    9.22
  -5   4   9    9.86    7.35
   4  -4  -9   48.25    9.17
   4  -4  -9   31.31   10.68
  -4   4   9   44.06    8.30
   4   4  -9   35.98    4.26
   4   4  -9   36.22    9.34
   4   4  -9   35.13    6.16
  -4   4   9   32.90   10.31
   3  -4  -9   57.53   10.61
   3  -4  -9   64.35    8.37
  -3   4   9   76.80   13.55
  -3   4   9   72.84    9.99
   3   4  -9   76.03    9.92
   2  -4  -9   71.00   10.80
   2  -4  -9   87.27   10.29
  -2   4   9   74.43   11.53
  -2   4   9   62.55    8.34
  -2   4   9   89.14   11.54
   2   4  -9   65.06    9.09
   1  -4  -9   47.66    7.69
   1  -4  -9   38.87    9.47
   1   4  -9   40.72    8.27
  -1   4   9   24.99    9.06
  -1   4   9   34.00    6.78
   0  -4  -9   14.83    8.82
   0  -4  -9    1.19    5.35
   0   4   9    1.70    8.07
   0   4   9    5.46    7.96
   0   4  -9   -0.29    7.29
   0   4   9   -0.22    5.21
  -1  -4  -9   21.95    5.92
  -1  -4  -9   22.70    9.90
  -1   4  -9   18.69    8.13
   1   4   9   26.20    6.77
   1   4   9   42.79    9.67
   1   4   9   23.81    9.28
  -2  -4  -9   31.11    6.85
  -2  -4  -9   42.81   11.03
   2   4   9   46.95   12.77
   2   4   9   38.61   10.27
  -2   4  -9   46.32    6.15
   2   4   9   71.77   10.24
  -3  -4  -9   54.51    8.03
  -3  -4  -9   81.39   12.58
   3  -4   9   93.03    9.83
  -3   4  -9   70.30    7.29
   3   4   9   80.59   11.31
  -3   4  -9   77.10    8.51
   3   4   9  113.49   16.34
  -4  -4  -9   25.83   11.42
   4  -4   9   27.02    7.21
  -4  -4  -9   17.40    6.94
  -4   4  -9   16.11    7.54
   4   4   9   17.90    7.09
   4   4   9   23.89   10.43
  -4   4  -9   14.12    5.64
   1   5  -9    4.06   10.80
  -1   5   9    5.79   11.25
   8   0 -10    3.22    7.07
  -8   0  10    1.81    5.62
   8   0 -10    8.38   10.50
  -7   0  10    2.83    4.84
   7   0 -10   -1.41    5.88
   7   0 -10    8.83    9.50
   6   0 -10  109.93    9.27
  -6   0  10  105.02    7.96
   6   0 -10   84.44   11.79
   5   0 -10    4.02    4.37
  -5   0  10   -0.62    3.57
   5   0 -10    0.46    5.58
  -5   0  10    0.55    6.22
  -4   0  10  159.49    7.85
   4   0 -10  152.77    8.77
  -4   0  10  138.94   10.47
   4   0 -10  149.77   11.11
  -3   0  10   -1.91    5.02
   3   0 -10    2.33    5.89
   3   0 -10    1.54    3.53
  -3   0  10    1.85    2.80
  -2   0  10   16.26    2.94
  -2   0  10   22.52    5.19
   2   0 -10   10.96    5.01
   2   0 -10   12.14    4.00
  -1   0  10    3.28    4.43
   1   0 -10   -1.27    2.91
   1   0 -10   -2.15    4.57
  -1   0  10   -0.25    2.25
   0   0 -10  328.36   12.92
   0   0 -10  326.45   14.08
   0   0  10  342.01   13.36
   0   0  10  330.95   11.84
   1   0  10   -2.05    2.39
   1   0  10   -2.73    4.40
  -1   0 -10    6.95    3.94
  -1   0 -10   -3.23    8.56
   2   0  10  197.14    8.67
  -2   0 -10  190.12   10.10
   2   0  10  188.74   11.05
  -2   0 -10  209.83   12.03
   3   0  10    1.22    6.05
  -3   0 -10    7.46    6.84
   3   0  10    4.13    3.30
  -3   0 -10    5.27    3.61
  -4   0 -10   43.03    6.75
   4   0  10   40.43    5.77
  -4   0 -10   58.70    9.06
   4   0  10   46.77    9.79
   5   0  10   -3.62    7.85
  -5   0 -10   -1.75    4.56
  -5   0 -10   -8.73    7.71
   5   0  10    3.89    4.11
  -6   0 -10  157.89   17.02
   6   0  10  173.19   11.15
   6   0  10  167.45   16.56
  -6   0 -10  172.86   13.32
  -7   0 -10   -1.64    9.89
   7   0  10  -13.60   10.90
  -7   0 -10  -10.26    8.90
   7   0  10    1.50    6.99
  -8  -1  10   12.34   11.32
  -8  -1  10    1.60    5.20
   8  -1 -10  -11.52    6.22
   8   1 -10   -0.38    9.50
  -8   1  10    1.41    6.05
   8   1 -10   -1.83    6.13
  -7  -1  10    0.86   10.07
   7  -1 -10   10.16    9.42
  -7  -1  10   12.46    4.48
   7  -1 -10   -3.98    6.36
   7   1 -10    6.60    7.86
   7   1 -10   12.83    5.98
  -7   1  10    1.09    5.07
  -7   1  10    2.77    8.63
  -6  -1  10   14.85    8.03
   6  -1 -10    9.93    5.52
   6  -1 -10    1.59    3.05
   6  -1 -10    5.79    7.47
  -6  -1  10    7.41    3.77
  -6   1  10    0.46    6.94
  -6   1  10   11.03    4.81
   6   1 -10    9.92    4.57
   6   1 -10    8.18    7.11
   5  -1 -10   24.49    8.23
   5  -1 -10   10.83    4.86
   5  -1 -10   14.14    2.76
  -5  -1  10   16.92    3.26
   5   1 -10   10.30    4.04
   5   1 -10   11.94    5.73
  -5   1  10   16.19    6.38
  -5   1  10   13.59    4.37
   4  -1 -10   12.35    4.06
  -4  -1  10   10.43    2.72
   4  -1 -10    6.79    7.18
   4   1 -10   10.35    3.77
  -4   1  10    4.69    6.68
  -4   1  10   15.92    3.50
   4   1 -10   13.13    6.70
  -3  -1  10  182.36    6.84
   3  -1 -10  183.86    9.79
   3  -1 -10  168.57   12.05
   3   1 -10  171.03    8.50
   3   1 -10  179.66   10.35
  -3   1  10  173.51    8.81
   2  -1 -10    9.31    3.81
  -2  -1  10    5.70    1.94
   2  -1 -10    5.18    6.11
   2   1 -10    2.61    4.45
  -2   1  10    6.44    2.96
   2   1 -10    5.73    2.84
  -2   1  10    5.12    5.08
  -1  -1  10   60.17    3.49
   1  -1 -10   51.65    6.27
   1  -1 -10   65.16    8.21
  -1  -1  10   50.03    5.61
   1   1 -10   53.37    6.86
  -1   1  10   55.98    5.54
   1   1 -10   61.32    5.21
  -1   1  10   77.04    8.52
   0  -1  10   -0.78    1.76
   0  -1 -10    2.93    3.36
   0  -1  10   -4.54    3.15
   0  -1 -10    7.10    5.85
   0   1  10    1.31    2.74
   0   1  10    7.70    5.36
   0   1 -10    1.23    4.15
   0   1 -10    2.42    2.79
  -1  -1 -10   26.90    5.36
   1  -1  10   13.23    4.18
  -1  -1 -10   11.17    6.53
   1  -1  10   14.33    2.26
  -1   1 -10   17.19    4.91
   1   1  10   12.87    5.46
  -1   1 -10   12.54    3.37
   1   1  10   10.35    3.37
  -2  -1 -10   18.03    6.44
   2  -1  10   14.67    2.56
   2  -1  10   11.93    4.43
  -2  -1 -10   16.90    4.41
   2  -1  10   13.11    2.39
   2   1  10   10.40    4.01
  -2   1 -10    6.20    3.76
  -2   1 -10   13.73    5.41
  -3  -1 -10   85.27   12.04
   3  -1  10   85.97    8.65
   3  -1  10   96.00    5.71
   3  -1  10  108.94    5.82
  -3  -1 -10   86.45    8.45
  -3   1 -10   95.46    7.88
   3   1  10  102.93   11.38
  -3   1 -10   94.71   10.18
   3   1  10   91.93    7.35
  -4  -1 -10    2.34    5.27
   4  -1  10   -4.08    3.36
   4  -1  10    6.96    6.51
  -4  -1 -10    5.75    7.90
   4   1  10   -6.33    7.73
  -4   1 -10    6.65    5.08
   4   1  10    2.45    4.74
  -4   1 -10   10.15    6.72
  -5  -1 -10   21.89    9.90
   5  -1  10   21.76    4.89
  -5  -1 -10   12.44    5.38
   5  -1  10   19.47    8.01
  -5   1 -10   12.87    8.14
  -5   1 -10   30.09    6.92
   5   1  10   12.99    7.90
   5   1  10   13.66    5.81
  -6  -1 -10  -11.83   10.13
  -6  -1 -10   -0.68    6.23
  -6   1 -10   -5.08    8.97
   6   1  10    2.09   10.98
   6   1  10   -5.89    5.37
  -6   1 -10   -7.49    5.85
  -7  -1 -10   92.01   14.88
  -7  -1 -10   57.37   15.96
   7  -1  10   45.15   12.07
  -7   1 -10   43.45   12.63
  -7   1 -10   48.35    8.56
   7   1  10   50.00   12.47
   7   1  10   45.63    8.61
   7  -2 -10   -4.47    9.06
   7  -2 -10    6.73    4.34
   7  -2 -10   13.83    6.83
   7   2 -10    8.08    6.01
  -7   2  10   12.08    6.06
  -7   2  10   13.69    8.74
   7   2 -10    1.25    8.91
   6  -2 -10   42.62    8.19
   6  -2 -10   29.59    3.87
   6  -2 -10   18.38    8.03
  -6   2  10   20.14    5.70
   6   2 -10   33.15    5.58
   6   2 -10   30.81    8.03
  -6   2  10   30.79    8.86
   5  -2 -10   95.41   11.43
   5  -2 -10   89.03    9.24
   5  -2 -10   95.42    5.80
   5   2 -10   74.37   10.63
  -5   2  10   79.82    8.45
   5   2 -10   74.38    6.97
  -5   2  10   66.76    9.40
   4  -2 -10    9.15    6.73
   4  -2 -10   -4.21    4.15
   4  -2 -10   -1.21    2.31
   4   2 -10    3.20    3.51
  -4   2  10   -0.46    4.56
   4   2 -10   11.59    5.25
  -4   2  10   13.43    8.10
   3  -2 -10    9.42    7.50
   3  -2 -10   -1.29    4.11
   3   2 -10    5.72    2.88
   3   2 -10    1.08    4.14
  -3   2  10    2.24    3.82
   3   2 -10    2.10    4.74
  -3   2  10   -2.57    5.99
   2  -2 -10   10.11    3.54
   2  -2 -10   13.57    7.29
  -2   2  10   10.23    4.23
   2   2 -10   10.47    4.02
   2   2 -10   12.93    2.88
  -2   2  10   -0.64    5.46
   2   2 -10    9.24    5.01
   1  -2 -10   52.81    6.66
   1  -2 -10   56.83    8.95
  -1   2  10   43.43    7.17
   1   2 -10   58.00    6.23
  -1   2  10   45.80    6.37
   1   2 -10   55.54    5.98
   1   2 -10   44.12    4.79
   0  -2 -10   26.85    5.34
   0  -2 -10   23.50    6.79
   0   2 -10   20.75    5.26
   0   2 -10   25.83    3.65
   0   2  10   14.24    4.00
   0   2  10   17.74    7.03
  -1  -2 -10   29.86    7.65
  -1  -2 -10   30.53    6.10
  -1   2 -10   21.39    5.52
   1   2  10   36.52    7.34
  -1   2 -10   38.22    5.04
  -2  -2 -10   21.52    5.47
   2  -2  10   19.29    3.17
  -2  -2 -10   24.17    8.16
   2   2  10   26.14    7.86
  -2   2 -10   18.78    4.04
  -2   2 -10   15.15    5.91
   2   2  10   13.96    4.62
  -3  -2 -10   -1.98    4.38
  -3  -2 -10    4.90    7.23
   3  -2  10   -2.35    3.23
  -3   2 -10   -3.39    4.11
   3   2  10   -6.75    6.87
   3   2  10   12.34    5.34
  -4  -2 -10    6.68    8.52
  -4  -2 -10   -1.86    6.67
   4  -2  10   -1.42    3.90
  -4   2 -10   -5.86    6.94
   4   2  10    4.77    5.46
   4   2  10    0.97    7.82
  -4   2 -10    0.07    4.63
  -5  -2 -10   64.11    9.14
   5  -2  10   60.75    7.55
  -5  -2 -10   51.66   11.51
   5   2  10   58.31    8.23
  -5   2 -10   41.99   10.51
  -5   2 -10   45.40    7.39
   5   2  10   36.83   11.28
   6  -2  10   12.67    4.42
  -6  -2 -10    0.85    7.63
  -6  -2 -10    5.76   11.03
   6  -2  10   -1.68    6.19
   6  -2  10   -0.75    8.08
   6   2  10   -2.14   11.34
  -6   2 -10    2.78    7.14
   6   2  10   -0.59    6.66
  -6   2 -10   -0.15   10.02
   6  -3 -10   21.84    4.37
   6  -3 -10   15.30   11.14
   6  -3 -10   30.37    7.44
   6   3 -10   21.73    8.20
  -6   3  10   18.10    9.94
   6   3 -10   21.65    5.69
  -6   3  10   19.06    7.01
   5  -3 -10   16.64    7.29
   5  -3 -10    9.24   10.21
   5  -3 -10   -3.61    3.43
  -5   3  10    2.99    8.47
  -5   3  10   -3.93    5.42
   5   3 -10  -13.23    6.13
   5   3 -10   -3.07    4.33
   4  -3 -10   19.88   10.73
   4  -3 -10   23.42    7.07
  -4   3  10   20.02    9.82
   4   3 -10   19.25    5.83
  -4   3  10   33.48    6.93
   4   3 -10   21.90    4.10
   3  -3 -10    9.04    4.98
   3  -3 -10    9.80    8.98
  -3   3  10    0.82    4.83
   3   3 -10   -0.06    5.94
  -3   3  10    5.64    8.61
   3   3 -10    4.13    3.54
   3   3 -10   10.78    4.85
   2  -3 -10   94.90    8.92
   2  -3 -10   83.22   10.07
   2   3 -10   65.10    9.40
   2   3 -10   71.65    5.02
  -2   3  10   75.19    8.41
  -2   3  10   65.62    9.73
   1  -3 -10   12.96    8.47
   1  -3 -10   18.05    4.92
  -1   3  10   15.26    5.90
  -1   3  10   21.37    9.24
  -1   3  10   14.96    4.58
   1   3 -10   23.48    5.97
   0  -3 -10   47.36    6.58
   0  -3 -10   40.69    9.57
   0   3  10   28.03    8.33
   0   3  10   38.45    5.71
   0   3  10   48.87    7.25
   0   3 -10   47.56    4.74
   0   3 -10   44.31    6.96
  -1  -3 -10   10.27    8.72
  -1  -3 -10   27.54    6.18
   1   3  10   10.84    8.42
  -1   3 -10   15.78    5.04
   1   3  10    9.40    5.55
   1   3  10   14.54    6.13
  -1   3 -10   11.57    3.37
   2  -3  10   46.22    5.91
  -2  -3 -10   61.93    8.84
  -2  -3 -10   34.18    9.73
  -2   3 -10   40.06    4.57
   2   3  10   34.01    5.80
  -2   3 -10   49.10    7.12
   2   3  10   52.93   11.90
  -3  -3 -10   11.49    9.91
  -3  -3 -10    0.00    5.75
   3  -3  10    6.84    4.38
   3   3  10  -21.30    9.81
   3   3  10    3.56    5.47
  -3   3 -10   -1.01    6.65
  -3   3 -10    5.89    4.42
   4  -3  10   87.98    8.38
  -4  -3 -10   73.83   13.68
  -4  -3 -10   74.27   10.33
   4   3  10   80.90   13.95
   4   3  10   78.55   10.26
  -4   3 -10   74.23    9.50
  -4   3 -10   73.13    8.05
  -5  -3 -10  -15.15   11.76
  -5  -3 -10   -5.25    7.44
   5  -3  10   -1.38    5.78
  -5   3 -10   -2.41    9.11
  -5   3 -10   21.60    7.30
   5   3  10   -1.99    6.78
   5   3  10   25.06   11.70
   4  -4 -10   10.96    7.36
   4  -4 -10   26.97   13.20
   4   4 -10   10.91    4.46
   4   4 -10   11.51    6.23
   4   4 -10   18.56    9.56
  -4   4  10    3.45    9.43
  -4   4  10   17.09    7.99
   3  -4 -10    2.02   10.71
   3  -4 -10    3.03    7.37
  -3   4  10    3.65    7.19
   3   4 -10   10.81    8.65
  -3   4  10   -9.12    9.01
   2  -4 -10   13.53    6.48
   2  -4 -10   -3.08   10.09
  -2   4  10   11.04    9.30
   2   4 -10    4.73    8.77
  -2   4  10    6.59    6.33
   1  -4 -10    0.57   10.47
   1  -4 -10   10.58    7.51
  -1   4  10    8.37    7.17
  -1   4  10   13.35    8.77
   1   4 -10   15.49    8.12
   0  -4 -10    5.07   10.79
   0  -4 -10   15.34    7.58
   0   4  10   15.37   10.65
   0   4  10   19.04    9.48
   0   4  10   16.64    7.12
   0   4 -10    8.34    8.19
  -1  -4 -10   18.00    7.69
  -1  -4 -10   40.49   12.59
   1   4  10   26.31    7.53
  -1   4 -10   27.50    9.18
   1   4  10   25.30    9.16
   1   4  10   66.07   13.59
  -2  -4 -10    0.22   11.75
  -2  -4 -10   15.46    8.07
   2   4  10    2.90   10.89
  -2   4 -10   11.37    6.27
   2   4  10   22.91    9.01
   2   4  10    9.41    9.14
   3  -4  10    3.41    6.53
  -3  -4 -10    1.35   12.24
  -3  -4 -10   -0.65    7.42
   3   4  10   -9.57   11.44
   3   4  10   -4.47    8.42
  -3   4 -10    1.29    7.49
  -3   4 -10    1.90    5.26
   8   0 -11    5.92    8.53
  -8   0  11   10.99    6.83
   8   0 -11    1.28   10.18
  -7   0  11  210.08   12.01
   7   0 -11  197.21   17.11
   7   0 -11  238.36   14.38
   6   0 -11  -14.66    5.61
  -6   0  11   -1.78    4.56
   6   0 -11    7.09    7.95
  -5   0  11   17.80    4.15
   5   0 -11   17.28    7.38
   5   0 -11    4.29    4.38
  -5   0  11    3.86    7.54
  -4   0  11   -1.86    5.74
   4   0 -11   10.81    6.96
   4   0 -11    1.63    3.64
   3   0 -11  111.50   10.66
   3   0 -11   96.01    7.64
  -3   0  11  106.60    9.99
  -3   0  11  111.53    6.78
  -2   0  11    0.54    2.74
  -2   0  11   -3.36    5.05
   2   0 -11    1.77    3.50
   2   0 -11    2.68    5.68
   1   0 -11  150.97   10.54
  -1   0  11  138.98   10.05
   1   0 -11  129.08    8.11
  -1   0  11  140.06    7.17
   0   0 -11    7.65    4.93
   0   0  11    7.44    5.58
   0   0  11    8.75    2.95
   0   0 -11   -2.71    3.16
  -1   0 -11    7.20    3.88
   1   0  11    4.53    5.38
   1   0  11    3.48    2.87
  -1   0 -11    6.54    5.82
  -2   0 -11  -10.25    6.35
   2   0  11    0.30    6.13
  -2   0 -11   -6.79    3.72
   2   0  11    1.24    3.35
  -3   0 -11   88.78    8.47
   3   0  11   64.75    6.40
   3   0  11   70.79    9.79
  -3   0 -11   64.62    8.99
   4   0  11   -7.31    8.58
  -4   0 -11   -4.87    8.90
  -4   0 -11    6.37    5.17
   4   0  11    6.22    4.26
   5   0  11   23.86    5.49
  -5   0 -11   11.96    6.70
   5   0  11   23.14   10.10
  -5   0 -11   13.48   10.53
  -6   0 -11  -24.76    9.99
  -6   0 -11   -8.98    7.91
   6   0  11   -9.54   10.98
   6   0  11   -6.09    6.46
   7  -1 -11   13.18    9.23
   7  -1 -11   14.44    7.88
   7  -1 -11   24.85    4.31
  -7  -1  11   15.65   11.27
  -7  -1  11   14.11    4.72
  -7   1  11    5.16    5.50
   7   1 -11    3.15    7.06
  -7   1  11   18.47   11.51
   7   1 -11    4.71   10.34
   6  -1 -11   51.51   11.05
  -6  -1  11   62.17   10.24
   6  -1 -11   54.75    5.20
  -6  -1  11   41.60    4.84
   6  -1 -11   69.50    9.23
  -6   1  11   43.05    9.70
   6   1 -11   41.01    6.06
   6   1 -11   47.40    9.52
  -6   1  11   51.14    7.54
   5  -1 -11   37.13    8.40
   5  -1 -11   34.28    6.66
  -5  -1  11   33.86    4.07
  -5   1  11   33.08    8.06
   5   1 -11   27.32    5.77
  -5   1  11   37.32    5.86
   5   1 -11   38.67    8.64
  -4  -1  11  123.28    6.42
   4  -1 -11  103.94   12.17
   4  -1 -11  127.06    9.18
  -4   1  11  121.85   12.62
   4   1 -11  133.19   11.07
  -4   1  11  123.56    8.39
   4   1 -11  152.10    9.01
   3  -1 -11   -2.37    6.67
   3  -1 -11    6.24    4.64
  -3  -1  11    6.72    2.46
   3   1 -11    9.23    3.93
   3   1 -11   -0.28    6.27
  -3   1  11    6.41    3.46
  -3   1  11    3.08    6.07
  -2  -1  11   -1.52    2.16
   2  -1 -11    4.97    6.35
   2  -1 -11    7.83    3.64
  -2  -1  11   -2.58    4.74
   2   1 -11    5.27    3.25
   2   1 -11   -1.99    5.53
  -2   1  11    3.69    3.67
  -1  -1  11   12.01    4.41
   1  -1 -11   14.65    6.29
  -1  -1  11   10.55    2.24
   1  -1 -11   11.69    4.66
   1   1 -11    9.41    3.46
  -1   1  11    9.11    3.97
   1   1 -11   10.74    5.22
   0  -1 -11   68.30    7.36
   0  -1  11   71.68    7.32
   0  -1 -11   76.82   10.38
   0   1 -11   65.96    6.23
   0   1 -11   69.01    8.76
   0   1  11   63.93    6.56
  -1  -1 -11   70.80    9.84
   1  -1  11   58.21    4.29
  -1  -1 -11   65.02    7.33
  -1   1 -11   64.84    6.55
   1   1  11   63.04    8.35
   1   1  11   70.66    6.63
   2  -1  11   42.24    4.60
  -2  -1 -11   40.09    5.25
  -2  -1 -11   53.51    9.59
   2  -1  11   65.59    7.22
   2   1  11   53.50    6.75
  -2   1 -11   48.36    6.92
   2   1  11   69.68   10.13
  -2   1 -11   57.78    7.66
   3  -1  11    1.85    2.95
  -3  -1 -11   -2.92    6.99
   3  -1  11    1.12    3.02
  -3  -1 -11   -9.10    4.23
   3  -1  11    4.94    5.96
   3   1  11    7.09    8.38
  -3   1 -11    5.75    4.63
   3   1  11    0.02    4.15
  -3   1 -11   -1.57    7.28
   4  -1  11   -1.79    6.94
  -4  -1 -11    5.20    9.85
   4  -1  11   -4.45    3.62
  -4   1 -11    5.07    7.90
  -4   1 -11   13.41    5.43
   4   1  11    4.65    8.91
   4   1  11    3.06    4.42
   5  -1  11   15.38    5.00
  -5  -1 -11   10.54   10.24
  -5  -1 -11    5.46    6.48
   5  -1  11    4.10    8.30
   5   1  11   12.08   11.01
  -5   1 -11    7.16    9.30
  -5   1 -11   11.64    6.76
   5   1  11   14.97    6.50
  -6  -1 -11   19.82   12.38
  -6  -1 -11    4.20    7.66
   6  -1  11    8.06    5.88
   6   1  11   -0.70    6.31
   6   1  11   11.45   12.60
  -6   1 -11    8.29    7.47
  -6   1 -11   17.74   11.92
   7  -2 -11   42.95    5.29
   7  -2 -11   32.46    9.77
   7  -2 -11   26.63   11.93
  -7   2  11   35.82    8.40
   7   2 -11   28.54    9.75
  -7   2  11   30.48   10.35
   7   2 -11   46.96    7.62
   6  -2 -11    5.59    6.45
   6  -2 -11   -6.29    9.46
   6  -2 -11    3.39    3.37
   6   2 -11    0.43    5.42
   6   2 -11    8.41    7.48
  -6   2  11    5.11    5.68
  -6   2  11    5.44    8.37
   5  -2 -11    4.36    2.92
   5  -2 -11   11.79    9.73
   5  -2 -11   -3.90    5.53
   5   2 -11   11.04    4.49
  -5   2  11  -10.37    7.87
   5   2 -11    3.78    6.36
  -5   2  11    0.02    5.10
   4  -2 -11    4.63    7.98
   4  -2 -11   15.72    5.74
  -4   2  11   15.09    7.44
   4   2 -11   10.29    3.94
   4   2 -11    0.15    5.49
  -4   2  11   13.94    5.08
   3  -2 -11   27.05    9.26
   3  -2 -11   23.81    5.29
  -3   2  11   15.27    4.14
   3   2 -11   17.70    3.89
   3   2 -11   20.56    4.87
   3   2 -11   18.75    6.28
  -3   2  11   18.80    8.43
   2  -2 -11   26.80    7.72
   2  -2 -11   22.75    4.70
   2   2 -11   27.11    5.89
   2   2 -11   24.14    4.61
  -2   2  11   19.15    4.30
  -2   2  11   17.46    7.15
   2   2 -11   25.73    3.79
   1  -2 -11   85.81    8.56
   1  -2 -11   99.68   11.42
   1   2 -11   74.96    6.06
   1   2 -11   70.57    7.19
  -1   2  11   87.03    7.61
   1   2 -11   73.79    8.26
  -1   2  11  106.53   11.87
   0  -2 -11   31.68    5.97
   0  -2 -11   29.10    8.06
   0   2 -11   32.76    6.04
   0   2  11   43.81    6.15
   0   2  11   42.74    8.30
   0   2 -11   46.57    5.48
  -1  -2 -11   -6.19    6.91
  -1  -2 -11    2.60    5.68
   1   2  11   -7.86    7.59
  -1   2 -11    4.37    5.43
  -1   2 -11    5.38    3.61
   1   2  11    3.33    4.04
   2  -2  11   35.83    4.36
  -2  -2 -11   49.01    9.55
  -2  -2 -11   24.34    5.48
   2   2  11   41.53    5.90
  -2   2 -11   39.71    5.17
   2   2  11   48.11    8.78
  -3  -2 -11   22.05    7.36
   3  -2  11   23.79    4.29
  -3  -2 -11   27.41    8.88
  -3   2 -11   14.65    4.76
   3   2  11   13.52    4.73
  -3   2 -11   24.83    7.77
   3   2  11   20.92   10.43
  -4  -2 -11   71.27   12.36
   4  -2  11   65.18    7.36
  -4  -2 -11   49.92    7.90
   4   2  11   83.87   13.82
  -4   2 -11   61.74    8.72
  -4   2 -11   74.00    9.22
   4   2  11   76.83    9.53
  -5  -2 -11    9.36   10.16
   5  -2  11   23.09    5.54
  -5  -2 -11   11.48    6.59
  -5   2 -11    9.52    6.13
   5   2  11    6.78   10.20
   5   2  11    8.01    5.52
  -5   2 -11   12.99    9.63
  -6   3  11   18.74   10.55
   6   3 -11   -4.06    5.83
   5  -3 -11    8.05   12.01
   5  -3 -11   12.99    7.71
   5  -3 -11   20.56    3.95
  -5   3  11   13.68    9.31
   5   3 -11   13.46    4.97
  -5   3  11   -2.24    6.50
   5   3 -11   -7.63    7.06
   4  -3 -11  -11.40    6.64
   4  -3 -11    4.18   11.12
   4   3 -11    6.48   11.80
  -4   3  11   -1.57    8.69
   4   3 -11    6.10    4.41
  -4   3  11    5.21    5.70
   3  -3 -11   30.66   10.98
   3  -3 -11   15.39    6.37
  -3   3  11   17.47    5.63
   3   3 -11   22.67    3.86
   3   3 -11   23.96    6.78
   3   3 -11   21.75    5.67
  -3   3  11   15.21    8.19
   2  -3 -11   20.12    9.83
   2  -3 -11   23.80    7.63
  -2   3  11   19.24    5.88
  -2   3  11    8.82    8.88
   2   3 -11   -0.07    5.02
   2   3 -11    6.01    6.11
   2   3 -11    7.50    3.44
   1  -3 -11    4.70    8.46
   1  -3 -11  -10.88    5.76
  -1   3  11    7.93    6.21
   1   3 -11   -0.91    3.54
  -1   3  11   10.57    9.88
   1   3 -11    9.54    5.93
   1   3 -11    0.27    4.84
  -1   3  11   -3.91    5.49
   0  -3 -11   48.07    8.22
   0  -3 -11   16.89    9.45
   0   3  11   36.75    6.88
   0   3  11   29.39    6.62
   0   3 -11   43.03    7.43
   0   3  11   43.71   11.28
   0   3 -11   34.27    5.96
   0   3 -11   38.19    4.60
  -1  -3 -11   61.27   10.08
  -1  -3 -11   34.18   10.49
   1   3  11   37.56    7.62
   1   3  11   47.80    7.23
   1   3  11   30.90    8.86
  -1   3 -11   38.59    4.53
  -1   3 -11   37.68    6.93
  -2  -3 -11   11.15   10.09
  -2  -3 -11    7.42    6.30
   2  -3  11   -3.41    4.53
  -2   3 -11    4.25    4.21
  -2   3 -11    2.75    6.57
   2   3  11   -0.52    5.17
   2   3  11   -4.26   10.86
  -3  -3 -11   11.56    7.07
   3  -3  11   23.55    5.54
  -3  -3 -11   34.39   10.83
  -3   3 -11   20.53    7.75
   3   3  11   13.85   12.54
   3   3  11   13.26    6.22
  -3   3 -11   18.28    5.08
   4  -3  11   11.10    5.82
  -4  -3 -11    6.07    7.31
  -4  -3 -11   -5.26   12.17
   4   3  11  -17.81   10.55
   4   3  11    5.57    6.19
  -4   3 -11    1.73    8.56
  -4   3 -11    1.23    5.95
   3  -4 -11   33.74   12.60
   3  -4 -11   30.52    8.84
  -3   4  11   43.95   10.27
   3   4 -11   28.73    9.20
  -3   4  11   32.92   12.20
   2  -4 -11   30.16    7.58
   2  -4 -11   17.85   12.69
  -2   4  11   35.20   10.97
  -2   4  11   43.72    7.87
   2   4 -11   35.64    9.37
   1  -4 -11   32.09    8.26
   1  -4 -11   47.17   13.93
  -1   4  11    8.23    9.24
   1   4 -11   48.22    9.27
  -1   4  11   40.58    7.54
  -1   4  11   25.73   12.23
   0  -4 -11    9.74    8.06
   0  -4 -11   14.49   11.60
   0   4  11   11.77    6.57
   0   4 -11   23.11    9.19
   0   4  11   10.29   12.02
  -1  -4 -11    6.28   13.54
   1   4  11    1.95    6.94
   1   4  11    0.46    9.42
   1   4  11   22.46    9.69
  -2  -4 -11   46.09    8.59
  -2  -4 -11   25.43   13.66
   2   4  11   13.49   11.41
  -2   4 -11   41.80    8.56
   2   4  11   48.04   10.48
  -2   4 -11   43.16    5.86
   7   0 -12   11.32    9.13
   7   0 -12   -5.40    6.40
  -7   0  12    1.77    5.58
   6   0 -12   19.93   10.83
  -6   0  12   21.04    5.27
   6   0 -12   31.04    6.37
   5   0 -12   -0.20    5.28
   5   0 -12    3.27    7.27
  -5   0  12   15.65    4.69
  -5   0  12   -5.66   14.54
  -4   0  12  120.91   11.92
   4   0 -12  133.02   12.99
   4   0 -12  122.98    9.60
  -4   0  12  150.71    8.54
   3   0 -12    8.47    4.52
  -3   0  12   -2.29    6.46
  -3   0  12   -0.69    3.57
   3   0 -12    6.03    7.28
   2   0 -12   58.26    7.06
   2   0 -12   50.72    7.96
  -2   0  12   54.51    8.31
  -2   0  12   44.33    5.65
  -1   0  12    2.69    5.90
   1   0 -12    5.42    4.10
   1   0 -12    0.59    6.44
  -1   0  12   -0.67    3.15
   0   0 -12   39.53    7.44
   0   0  12   34.27    7.09
   0   0  12   36.52    4.47
   0   0 -12   38.12    5.74
   1   0  12    2.50    3.25
   1   0  12   -5.49    6.21
  -1   0 -12    0.76    7.58
  -1   0 -12   -4.83    4.30
   2   0  12   51.24    8.46
   2   0  12   37.87    5.05
  -2   0 -12   38.57    9.78
  -2   0 -12   34.41    5.77
  -3   0 -12   -0.79    7.95
   3   0  12   -0.92    4.16
  -3   0 -12    5.21    5.45
   3   0  12   -2.84    3.27
  -4   0 -12   24.53   10.69
  -4   0 -12   19.31    6.44
   4   0  12   14.36   10.02
   4   0  12   16.07    4.90
   5   0  12   11.37    5.79
  -5   0 -12  -14.93   11.15
   5   0  12    1.70   10.81
  -5   0 -12    1.04    6.85
  -7  -1  12   34.47    5.83
  -7  -1  12   34.17   12.70
   7  -1 -12   44.33    4.87
   7  -1 -12   24.06   10.38
   7  -1 -12   34.38    9.56
   7   1 -12   24.81   10.22
  -7   1  12   32.97    7.23
   7   1 -12   30.75    7.51
  -7   1  12   10.23   11.99
   6  -1 -12   -0.56   10.07
  -6  -1  12    6.66    9.72
  -6  -1  12    7.44    4.68
   6  -1 -12   11.29    7.26
  -6   1  12    0.83    6.03
   6   1 -12   13.64    5.85
   6   1 -12   28.33   10.24
  -6   1  12    5.18    9.18
   5  -1 -12   53.58    8.25
  -5  -1  12   51.01    5.12
   5  -1 -12   44.24   10.80
  -5   1  12   34.61    9.02
   5   1 -12   49.86    6.62
  -5   1  12   62.29    7.98
   5   1 -12   49.45    9.44
  -4  -1  12    0.57    3.26
   4  -1 -12    9.50    5.51
   4  -1 -12   -2.82    7.84
   4   1 -12    8.73    5.52
  -4   1  12    5.65    7.88
   4   1 -12   -6.35    6.68
  -4   1  12   -0.49    4.22
   3  -1 -12    9.95    4.85
  -3  -1  12    7.64    2.83
   3  -1 -12    0.11    7.06
   3   1 -12    7.99    6.47
  -3   1  12    2.84    4.34
   3   1 -12    8.37    4.90
  -3   1  12   -6.91    7.67
   2  -1 -12   30.86    6.05
  -2  -1  12   31.84    3.52
   2  -1 -12   18.88    7.51
   2   1 -12   43.04    6.30
   2   1 -12   19.11    7.17
  -2   1  12   21.53    4.24
  -2   1  12   24.00    8.23
   1  -1 -12   45.05    6.35
   1  -1 -12   38.58    8.27
  -1   1  12   26.61    7.25
  -1   1  12   51.37    6.93
   1   1 -12   35.68    7.16
   1   1 -12   39.65    5.76
   0  -1 -12   40.15    6.89
   0  -1 -12   45.19    8.78
   0   1  12   36.81    5.08
   0   1 -12   46.15    6.33
   0   1 -12   26.66    6.87
   0   1  12   32.85    8.42
  -1  -1 -12   21.15    8.72
  -1  -1 -12   14.73    5.40
   1  -1  12   22.67    9.99
   1  -1  12   18.54    3.06
  -1   1 -12   14.70    6.37
   1   1  12   11.51    7.93
  -1   1 -12    8.87    4.66
   1   1  12   21.90    4.92
  -2  -1 -12    6.63    4.94
  -2  -1 -12   -2.49    7.63
   2  -1  12    1.70    3.13
   2  -1  12   -0.65    5.60
  -2   1 -12   -2.59    7.28
  -2   1 -12   -3.51    4.53
   2   1  12    7.17    4.01
   2   1  12    1.27    8.27
  -3  -1 -12   23.21   10.89
  -3  -1 -12   11.00    5.21
   3  -1  12   23.91    3.89
   3  -1  12   15.07    6.77
   3   1  12   27.84    5.83
   3   1  12   23.37    8.95
  -3   1 -12   23.89    6.05
  -3   1 -12   23.89    7.95
   4  -1  12   19.71    8.31
  -4  -1 -12   21.86   10.10
   4  -1  12   15.62    4.17
  -4  -1 -12   30.19    8.75
   4   1  12   28.10    6.24
   4   1  12   10.12    9.88
  -4   1 -12   -1.82    9.49
  -4   1 -12   14.16    6.05
   5  -1  12   27.30   10.47
  -5  -1 -12   29.06    9.00
  -5  -1 -12   26.88   11.41
   5  -1  12   33.76    5.81
   5   1  12   31.30   11.48
   5   1  12   22.47    6.87
  -5   1 -12   20.83    7.43
  -5   1 -12   27.42   12.30
   6  -2 -12   14.90    7.11
   6  -2 -12  -18.55   10.29
   6  -2 -12    7.92    3.53
  -6   2  12    0.06    6.54
   6   2 -12    6.75    6.05
  -6   2  12   -9.90    9.47
   6   2 -12    5.29    9.14
   5  -2 -12   46.90    7.98
   5  -2 -12   53.94   11.78
   5   2 -12   44.86    8.71
  -5   2  12   33.39    6.30
   5   2 -12   52.65    7.25
  -5   2  12   46.03   11.51
   4  -2 -12  -11.16    5.49
   4  -2 -12    9.69   10.24
   4   2 -12    1.35    4.83
   4   2 -12   -3.83    4.35
  -4   2  12    3.49    4.78
   4   2 -12   -1.23    6.53
  -4   2  12    0.56    8.87
   3  -2 -12   35.08    9.68
   3  -2 -12   30.99    7.75
   3   2 -12   40.00    7.48
   3   2 -12   38.94    5.07
  -3   2  12   34.77    6.51
   3   2 -12   35.81    5.36
  -3   2  12   15.09    8.15
   2  -2 -12   -0.25    4.52
   2  -2 -12    9.76    7.63
   2   2 -12    5.92    3.97
  -2   2  12    4.20    4.42
  -2   2  12    0.92    7.69
   1  -2 -12   43.28   10.36
   1  -2 -12   43.98    6.47
   1   2 -12   60.13    6.04
  -1   2  12   85.75   12.15
  -1   2  12   60.47    7.64
   1   2 -12   53.09    8.36
   0  -2 -12   19.41    9.22
   0  -2 -12   26.63    6.63
   0   2 -12   -1.24   11.53
   0   2  12   18.98    5.52
   0   2 -12   11.09    4.29
   0   2  12   17.35    8.98
  -1  -2 -12  113.03   12.93
  -1  -2 -12   91.45   10.06
   1   2  12  104.09   13.29
  -1   2 -12   97.77   11.54
  -1   2 -12   93.94    7.81
   1   2  12   85.34    8.87
  -2  -2 -12   -4.07    5.59
   2  -2  12    5.27    3.82
  -2  -2 -12   -3.53    8.71
   2   2  12    5.78    4.96
  -2   2 -12    3.22    4.75
   2   2  12    3.18    8.84
  -2   2 -12   -1.68    6.96
  -3  -2 -12   28.45    8.47
  -3  -2 -12   38.63   10.12
   3  -2  12   25.70    4.56
   3   2  12   20.41   11.77
   3   2  12   24.88    5.91
  -3   2 -12   17.04    8.72
  -3   2 -12   27.86    6.35
  -4  -2 -12    2.41    8.99
  -4  -2 -12   18.39   11.77
   4  -2  12   10.38    4.96
   4   2  12    1.74   10.71
   4   2  12    8.85    6.15
  -4   2 -12    1.32    6.21
  -4   2 -12   -8.01    9.90
   4  -3 -12   18.20    8.09
   4  -3 -12    5.09   10.55
   4   3 -12    4.24    6.67
  -4   3  12   24.58    7.11
  -4   3  12   -8.74   11.72
   4   3 -12    7.53    9.00
   4   3 -12    9.88    4.84
   3  -3 -12   10.78   10.30
   3  -3 -12    1.25    6.46
  -3   3  12   26.28   12.43
   3   3 -12    1.09    6.47
   3   3 -12    8.31    6.96
   3   3 -12   -1.36    4.22
  -3   3  12   -5.27    6.55
   2  -3 -12  167.10   17.51
   2  -3 -12  164.48   12.21
   2   3 -12  148.53    7.95
  -2   3  12  139.26   16.25
   2   3 -12  124.62   11.14
   2   3 -12  129.63   10.72
  -2   3  12  152.61   11.49
   1  -3 -12   15.37   10.54
   1  -3 -12   27.10    6.56
   1   3 -12   10.21    4.21
   1   3 -12    9.65    6.36
   1   3 -12   14.69    6.00
  -1   3  12   29.60   10.83
  -1   3  12   32.53    7.48
   0  -3 -12   14.47   11.43
   0  -3 -12   13.36    7.17
   0   3  12   21.12    6.18
   0   3 -12    7.28    5.87
   0   3  12    8.39    9.82
   0   3  12   12.29    6.71
   0   3 -12    2.26    3.88
  -1  -3 -12    1.28    7.42
  -1  -3 -12   -5.40    9.59
  -1   3 -12    3.09    6.37
   1   3  12    6.06    6.89
   1   3  12   -1.15    5.45
  -1   3 -12    9.52    4.47
   1   3  12  -14.78   11.14
  -2  -3 -12    8.40   10.53
  -2  -3 -12   -0.02    7.91
   2   3  12   10.48    8.09
   2   3  12   11.29   11.11
   2   3  12   -1.04    5.76
  -2   3 -12    0.53    4.89
  -2   3 -12    8.96    8.02
  -3  -3 -12   12.17    9.08
   3  -3  12    3.44    5.64
  -3  -3 -12   33.42   10.23
  -3   3 -12    5.98    8.71
  -3   3 -12   17.64    6.10
   3   3  12   -6.04    6.58
   3   3  12  -16.75   11.60
   6   0 -13   -4.95    9.46
   6   0 -13   -6.48    6.42
  -6   0  13    1.09    5.23
  -5   0  13   27.14    9.63
   5   0 -13   35.58    9.13
   5   0 -13   51.93    7.81
  -5   0  13   48.85    6.42
   4   0 -13   16.56    8.63
  -4   0  13   11.27    4.50
   4   0 -13   -1.28    5.25
   3   0 -13   63.12    8.29
  -3   0  13   54.47    6.63
   3   0 -13   40.42    8.92
  -3   0  13   42.43    8.64
   2   0 -13    1.29    5.26
  -2   0  13    0.92    3.68
  -2   0  13    1.01    6.91
   2   0 -13    1.10    7.11
  -1   0  13   88.20    9.60
   1   0 -13   61.68    8.44
  -1   0  13   72.38    6.78
   1   0 -13   56.06    8.49
   0   0 -13   -3.67    7.24
   0   0  13    3.60    3.79
   0   0 -13    6.12    5.11
   0   0  13    6.97    7.02
  -1   0 -13   26.23    6.25
   1   0  13   17.69    4.29
   1   0  13   18.61    8.58
  -1   0 -13   12.80    7.52
  -2   0 -13    4.67    6.97
   2   0  13   10.70    9.37
   2   0  13    1.59    4.16
  -2   0 -13   -6.43    7.84
  -3   0 -13   27.37    9.36
  -3   0 -13   41.66    8.18
   3   0  13   38.63    5.40
   3   0  13   42.62   11.19
   4   0  13   -5.03    4.45
  -4   0 -13   -1.92    6.39
   4   0  13   -2.86    5.48
   4   0  13    9.75   10.62
  -4   0 -13   -3.40   11.94
   6  -1 -13  -15.71    8.84
  -6  -1  13   20.49   11.51
   6  -1 -13   10.65    7.40
  -6  -1  13   17.82    4.85
  -6   1  13    9.64    6.33
   6   1 -13    9.48   11.26
  -6   1  13    0.38   10.34
   6   1 -13    6.18    7.57
  -5  -1  13   14.79    4.44
   5  -1 -13   25.49   10.92
   5  -1 -13   30.34    7.93
  -5   1  13   13.86    5.88
   5   1 -13   30.14    6.26
   5   1 -13   33.96   10.30
  -5   1  13   33.19    9.75
   4  -1 -13   72.80   11.63
   4  -1 -13   75.49   10.43
  -4  -1  13   64.35    6.18
   4   1 -13   81.72    8.72
  -4   1  13   71.68    8.56
   4   1 -13   80.38   10.48
  -4   1  13   56.56   10.07
   3  -1 -13    5.54    8.80
   3  -1 -13    8.35    5.38
  -3  -1  13    7.28    3.34
   3   1 -13    5.41    4.98
  -3   1  13   17.13    4.60
  -3   1  13    7.71    7.73
   3   1 -13    1.83    7.12
   2  -1 -13   12.32    8.27
   2  -1 -13   14.15    5.92
  -2   1  13   22.47    9.43
   2   1 -13    7.57    7.18
  -2   1  13   10.84    4.40
   2   1 -13   -3.47    4.32
   1  -1 -13    0.20    4.50
   1  -1 -13    2.68    7.56
  -1   1  13    7.34    4.69
   1   1 -13   -7.15    4.25
  -1   1  13   -7.63    7.63
   1   1 -13    5.18    6.92
   0  -1 -13   21.24    6.56
   0  -1 -13   21.37    9.33
   0   1 -13    7.68    4.43
   0   1  13    3.52    4.19
   0   1 -13   12.87    7.55
   0   1  13    7.96    8.32
  -1  -1 -13   31.74    6.36
  -1  -1 -13   63.05   11.78
   1  -1  13   70.66    8.81
   1  -1  13   58.98    5.43
   1   1  13   35.79    5.63
   1   1  13   84.05   10.87
  -1   1 -13   41.87    8.50
  -1   1 -13   56.42    7.57
   2  -1  13   87.60   10.32
  -2  -1 -13   62.18   10.57
   2  -1  13   78.86    6.38
  -2  -1 -13   90.64   10.71
   2   1  13   75.89    8.90
  -2   1 -13   74.20    9.55
  -2   1 -13   87.75   10.96
   2   1  13   84.11   11.22
  -3  -1 -13    9.85    6.16
  -3  -1 -13   -0.77    9.80
   3  -1  13   17.26    3.97
   3  -1  13   26.45    8.04
   3   1  13   20.79   11.65
  -3   1 -13   18.69    9.89
   3   1  13   15.64    5.55
  -3   1 -13   33.46    6.38
  -4  -1 -13   15.93    7.83
   4  -1  13    7.93    9.04
  -4  -1 -13   13.10   11.41
   4  -1  13    1.93    4.88
   4   1  13   -2.05    5.83
   4   1  13   -0.40   12.39
  -4   1 -13   -1.44    9.46
  -4   1 -13   -7.88    6.65
   5  -2 -13    0.45    6.98
   5  -2 -13    7.54   10.16
   5   2 -13   -1.62    5.62
  -5   2  13   16.93   12.54
   5   2 -13    1.09    8.23
  -5   2  13   -1.14    6.82
   4  -2 -13   16.92    8.53
   4  -2 -13   -3.28    9.78
   4   2 -13   18.94    8.42
  -4   2  13    8.81    6.14
   4   2 -13    8.32    5.56
  -4   2  13   -4.23    9.93
   3  -2 -13    1.68    6.39
   3  -2 -13   -6.98    9.41
  -3   2  13    2.84    9.25
  -3   2  13    2.19    6.02
   3   2 -13    0.59    6.97
   3   2 -13   -1.48    4.52
   2  -2 -13   37.72   10.29
   2  -2 -13   42.60    8.06
  -2   2  13   45.34   10.55
   2   2 -13   35.80    5.41
  -2   2  13   31.94    6.20
   2   2 -13   26.52    7.94
   1  -2 -13   16.08    6.18
   1  -2 -13    5.54    9.61
   1   2 -13    8.24    4.74
   1   2 -13   21.98    7.46
  -1   2  13   18.16    9.79
  -1   2  13   14.88    5.16
   0  -2 -13   49.29   11.04
   0  -2 -13   50.44    7.58
   0   2  13   59.00   10.27
   0   2 -13   61.58    7.74
   0   2 -13   71.99    9.31
   0   2  13   70.26    9.20
  -1  -2 -13  -17.06   10.08
  -1  -2 -13    8.73    6.36
  -1   2 -13    3.13    7.17
  -1   2 -13   12.62    5.01
   1   2  13   -1.88    9.18
   1   2  13    9.50    5.18
  -2  -2 -13   -7.07    6.72
  -2  -2 -13    0.87    9.80
  -2   2 -13    6.31    7.86
   2   2  13    5.61   10.48
  -2   2 -13    1.79    5.58
   2   2  13    2.92    5.74
  -3  -2 -13    7.52   10.87
  -3  -2 -13    8.72    7.88
   3  -2  13   21.94    5.25
  -3   2 -13   -1.17    6.35
  -3   2 -13   10.93    8.55
   3   2  13   16.47    7.04
   3   2  13   10.77   13.14
   3  -3 -13   80.03   13.85
   3  -3 -13   68.57   12.14
   3   3 -13   64.62    8.05
   3   3 -13   56.27    8.61
  -3   3  13   60.40   13.08
   3   3 -13   76.67   10.79
  -3   3  13   94.29   13.66
   2  -3 -13   20.31    7.02
   2  -3 -13   -7.27    9.98
   2   3 -13   23.02    5.02
   2   3 -13   12.09    8.27
   2   3 -13   -5.03    6.55
  -2   3  13    9.15    6.34
  -2   3  13   -3.24   12.09
   1  -3 -13   19.60   10.97
   1  -3 -13   26.11    8.37
  -1   3  13   19.79   10.33
   1   3 -13   35.78    5.07
  -1   3  13   35.59    6.53
   0  -3 -13   -1.78    6.69
   0  -3 -13    1.19   10.87
   0   3 -13    9.80    4.74
   0   3  13   -3.03    6.06
   0   3  13    4.42   11.75
  -1  -3 -13   26.92   11.95
  -1  -3 -13   29.74    8.44
   1   3  13   23.51   10.41
  -1   3 -13   28.88    5.75
   1   3  13   34.60    9.27
   1   3  13   26.57    8.50
  -1   3 -13   41.04    7.41
  -5   0  14   -8.59    9.83
   5   0 -14   -5.18    6.37
   5   0 -14   -3.31    9.64
  -5   0  14   -0.71    5.46
   4   0 -14   68.03    8.38
   4   0 -14   61.80   10.15
  -4   0  14   85.31   13.44
  -4   0  14   73.67    8.08
  -3   0  14    6.42    4.57
   3   0 -14    8.92    9.08
  -3   0  14  -17.46   16.04
   3   0 -14    7.31    6.23
   2   0 -14   38.51   10.39
   2   0 -14   43.18    7.73
  -2   0  14   20.05    8.83
  -2   0  14   20.30    4.69
   1   0 -14   -0.34    7.66
   1   0 -14   18.85    5.91
  -1   0  14    3.42    8.20
  -1   0  14    1.14    4.08
   0   0  14   12.47    4.46
   0   0  14    4.01    8.69
   0   0 -14    6.79    9.18
   0   0 -14   30.60    8.03
   1   0  14   -8.78   15.30
  -1   0 -14    7.94    5.70
  -1   0 -14    3.49    9.63
   1   0  14    4.84    4.48
  -2   0 -14   32.49    7.01
   2   0  14   26.48    5.42
   2   0  14   25.11   12.16
  -2   0 -14   10.22    9.12
   3   0  14   25.76   10.79
   3   0  14    4.09    5.14
  -3   0 -14    6.99    9.53
  -3   0 -14    7.20    7.85
   5  -1 -14   73.10   11.37
   5  -1 -14   34.78   10.98
  -5  -1  14   62.70    7.59
   5   1 -14   48.31   10.64
   5   1 -14   60.22    8.51
  -5   1  14   88.07   10.55
  -5   1  14   35.35   13.59
   4  -1 -14   26.30   10.00
   4  -1 -14   29.21    7.99
  -4  -1  14   22.12    4.11
   4   1 -14   21.17    9.17
  -4   1  14   22.38    6.32
  -4   1  14   28.92   11.61
   4   1 -14   22.92    6.48
   3  -1 -14   -4.40    7.74
   3  -1 -14  -10.03    9.55
   3   1 -14   -8.85    8.16
  -3   1  14    0.86    5.91
   3   1 -14   -0.89    5.84
  -3   1  14   -8.80    9.29
   2  -1 -14    1.84   10.37
   2  -1 -14   -5.71    5.44
   2   1 -14   -4.13    5.31
  -2   1  14    4.90    5.16
  -2   1  14   -0.29    9.90
   2   1 -14  -11.48    8.55
   1  -1 -14   82.42   11.62
   1  -1 -14   76.54   11.03
   1   1 -14   61.21    9.57
  -1   1  14   85.04    8.92
  -1   1  14  104.34   13.09
   1   1 -14   89.58    9.15
   0  -1 -14   78.05    9.48
   0  -1 -14   47.99   11.13
   0   1  14   88.55   12.73
   0   1 -14   80.87    8.59
   0   1  14   76.53    8.55
  -1  -1 -14   27.26   11.06
  -1  -1 -14   17.33    8.47
  -1   1 -14   22.04    6.40
  -1   1 -14   27.00    9.44
   1   1  14   27.95    6.78
   1   1  14   35.83   12.08
   2  -1  14   25.25    7.82
  -2  -1 -14   -2.04   10.75
  -2  -1 -14    9.21    6.82
   2   1  14   -0.54   10.79
  -2   1 -14    7.12    6.03
   2   1  14   25.25    6.68
  -2   1 -14   10.22    9.39
  -3  -1 -14   13.42    7.25
  -3  -1 -14   -7.38   11.89
   3  -1  14    7.40    8.84
  -3   1 -14   15.18    6.88
   3   1  14    4.41   13.43
   3   1  14   19.51    6.83
  -3   1 -14   -1.84   10.99
   3  -2 -14   97.32   12.53
   3  -2 -14   48.26   11.93
  -3   2  14   85.28   15.17
   3   2 -14   86.07    9.92
  -3   2  14   74.78   10.70
   3   2 -14   95.08   13.19
   2  -2 -14   33.03    8.43
   2  -2 -14   43.94   10.41
  -2   2  14   29.88   10.82
  -2   2  14   32.01    6.22
   2   2 -14   29.69    6.16
   2   2 -14   23.26    8.39
   1  -2 -14   19.63   10.32
   1  -2 -14   40.35    8.59
   1   2 -14   48.55    6.60
  -1   2  14   32.43    7.01
   1   2 -14   31.66    8.70
  -1   2  14   36.20   10.92
   0  -2 -14    1.55   11.21
   0  -2 -14  -11.62    7.60
   0   2  14    8.92    6.88
   0   2 -14    7.00    7.82
   0   2 -14   11.10    5.75
   0   2  14    6.32   11.57
  -1  -2 -14   -9.02    9.67
  -1  -2 -14   12.51    8.61
  -1   2 -14   16.35    8.99
   1   2  14   15.46    7.05
   1   2  14   31.33   11.06
  -2  -2 -14   11.58   14.55
  -2  -2 -14    3.18   11.16
   2   2  14   15.80   13.70
  -2   2 -14    7.97    9.04
  -2   2 -14   -1.03    6.33
   2   2  14    0.53    6.32
   3   0 -15    8.72   11.26
  -3   0  15   14.45    5.30
   3   0 -15   -4.50    7.28
  -3   0  15    7.64   11.43
  -2   0  15   -2.48    4.79
   2   0 -15  -14.67    9.20
   2   0 -15    7.07    6.45
   1   0 -15   21.19    7.05
   1   0 -15   13.85    9.66
  -1   0  15   26.06    5.27
   0   0  15    0.02    4.89
   0   0 -15   -5.71    7.72
   0   0 -15    0.34   10.25
  -1   0 -15   73.19    9.30
   1   0  15  110.10    9.28
   1   0  15  119.20   15.65
  -1   0 -15   97.55   12.18
   3  -1 -15   27.68   10.34
   3  -1 -15   46.40    8.13
  -3   1  15   26.09   12.71
  -3   1  15   39.73    7.13
   3   1 -15   23.94    6.74
   3   1 -15   23.43    9.70
   2  -1 -15   48.28   10.03
   2  -1 -15   33.19   10.14
  -2   1  15   39.27   12.35
   2   1 -15   40.81   10.09
  -2   1  15   35.04    7.38
   2   1 -15   42.12    6.72
   1  -1 -15   13.60    9.36
   1  -1 -15   13.00    7.55
   1   1 -15   -4.26    5.95
  -1   1  15   -8.10    5.55
   1   1 -15   10.65    9.21
  -1   1  15   -1.50   11.38
   0  -1 -15    5.15    9.53
   0  -1 -15   12.52    7.07
   0   1 -15    2.83    6.76
   0   1 -15   13.33   10.05
   0   1  15    7.52   11.51
   0   1  15   14.46    5.99
  -1  -1 -15   14.79   10.32
  -1  -1 -15   14.84    8.12
  -1   1 -15  -10.17   10.36
  -1   1 -15   10.80    7.50
   1   1  15   13.90    6.15
   1   1  15    6.14   12.44
   0   0   0    0.00    0.00
;
_shelx_hkl_checksum    2303

# start Validation Reply Form
_vrf_THETM01_Compound1
;
PROBLEM: The value of sine(theta_max)/wavelength is less than 0.550
RESPONSE: Even though crystal data was collected up to 0.77 Angstroms resolution,
crystals still diffracted quite weakly at high angle due to their rather low quality
and data were cut off according to intensity statistics
;
# end Validation Reply Form
