# Supplementary material
Source: MDPI journal article supplement (https://www.mdpi.com/2304-6740/9/3/20)
Supplement: s1 [file s1 › Compound2.cif]

 
data_Compound2
 
_audit_creation_method            SHELXL-2014
_chemical_name_systematic
;
 ?
;
_chemical_name_common             ?
_chemical_melting_point           ?
_chemical_formula_moiety          ?
_chemical_formula_sum
 'C32 H20 Cd2 N8 O8' 
_chemical_formula_weight          869.36

loop_
 _atom_type_symbol
 _atom_type_description
 _atom_type_scat_dispersion_real
 _atom_type_scat_dispersion_imag
 _atom_type_scat_source
 'C'  'C'   0.0033   0.0016
 'International Tables Vol C Tables 4.2.6.8 and 6.1.1.4'
 'H'  'H'   0.0000   0.0000
 'International Tables Vol C Tables 4.2.6.8 and 6.1.1.4'
 'N'  'N'   0.0061   0.0033
 'International Tables Vol C Tables 4.2.6.8 and 6.1.1.4'
 'O'  'O'   0.0106   0.0060
 'International Tables Vol C Tables 4.2.6.8 and 6.1.1.4'
 'Cd'  'Cd'  -0.8075   1.2024
 'International Tables Vol C Tables 4.2.6.8 and 6.1.1.4'
 
_space_group_crystal_system       triclinic
_space_group_IT_number            2
_space_group_name_H-M_alt         'P -1'
_space_group_name_Hall            '-P 1'
 
_shelx_space_group_comment
;
The symmetry employed for this shelxl refinement is uniquely defined
by the following loop, which should always be used as a source of
symmetry information in preference to the above space-group names.
They are only intended as comments.
;
 
loop_
 _space_group_symop_operation_xyz
 'x, y, z'
 '-x, -y, -z'
 
_cell_length_a                    8.7080(4)
_cell_length_b                    9.0640(3)
_cell_length_c                    19.4510(7)
_cell_angle_alpha                 101.0890(10)
_cell_angle_beta                  90.961(2)
_cell_angle_gamma                 98.0630(10)
_cell_volume                      1490.18(10)
_cell_formula_units_Z             2
_cell_measurement_temperature     100(2)
_cell_measurement_reflns_used     10147
_cell_measurement_theta_min       2.55 
_cell_measurement_theta_max       28.70 
 
_exptl_crystal_description        'Prismatic'
_exptl_crystal_colour             'Colourless' 
_exptl_crystal_density_meas       ? 
_exptl_crystal_density_method     ?              
_exptl_crystal_density_diffrn     1.937          
_exptl_crystal_F_000              856
_exptl_transmission_factor_min    ?                                             
_exptl_transmission_factor_max    ?                                             
_exptl_crystal_size_max           0.14 
_exptl_crystal_size_mid           0.13 
_exptl_crystal_size_min           0.13 
_exptl_absorpt_coefficient_mu     1.497
_shelx_estimated_absorpt_T_min    ? 
_shelx_estimated_absorpt_T_max    ? 
_exptl_absorpt_correction_type    'Empirical'  
_exptl_absorpt_correction_T_min   0.702 
_exptl_absorpt_correction_T_max   0.746 
_exptl_absorpt_process_details
;
SADABS-2014/3 (Bruker,2014/3) was used for absorption correction.
wR2(int) was 0.0706 before and 0.0469 after correction.
The Ratio of minimum to maximum transmission is 0.9433.
The \l/2 correction factor is 0.00150.
;
 
_exptl_special_details
;
 ?
;
 
_diffrn_ambient_temperature       100(2)
_diffrn_radiation_wavelength      0.71069
_diffrn_radiation_type            MoK\a
_diffrn_source                    'fine-focus sealed tube'
_diffrn_measurement_device_type   'Bruker D8 Venture'
_diffrn_measurement_method        'Phi and Omega Scans'
_diffrn_detector_area_resol_mean  ? 
_diffrn_reflns_number             33611
_diffrn_reflns_av_unetI/netI      0.0582
_diffrn_reflns_av_R_equivalents   0.0722
_diffrn_reflns_limit_h_min        -11
_diffrn_reflns_limit_h_max        11
_diffrn_reflns_limit_k_min        -12
_diffrn_reflns_limit_k_max        11
_diffrn_reflns_limit_l_min        -26
_diffrn_reflns_limit_l_max        26
_diffrn_reflns_theta_min          2.314
_diffrn_reflns_theta_max          28.736
_diffrn_reflns_theta_full         25.240
_diffrn_measured_fraction_theta_max   0.994
_diffrn_measured_fraction_theta_full  0.999
_diffrn_reflns_Laue_measured_fraction_max    0.994
_diffrn_reflns_Laue_measured_fraction_full   0.999
_diffrn_reflns_point_group_measured_fraction_max   0.994
_diffrn_reflns_point_group_measured_fraction_full  0.999
_reflns_number_total              7671
_reflns_number_gt                 5938
_reflns_threshold_expression      'I > 2\s(I)'
_reflns_Friedel_coverage          0.000
_reflns_Friedel_fraction_max      .
_reflns_Friedel_fraction_full     .
 
_reflns_special_details
;
 Reflections were merged by SHELXL according to the crystal
 class for the calculation of statistics and refinement.
 
 _reflns_Friedel_fraction is defined as the number of unique
 Friedel pairs measured divided by the number that would be
 possible theoretically, ignoring centric projections and
 systematic absences.
;
 
_computing_data_collection        'Bruker ApexII'
_computing_cell_refinement        'Bruker Apex II'
_computing_data_reduction         'Bruker Apex II'
_computing_structure_solution     'SHELXL-2014 (Sheldrick, 2014)'
_computing_structure_refinement   'SHELXL-2014 (Sheldrick, 2014)'
_computing_molecular_graphics     ?
_computing_publication_material   'SHELXL-2014 (Sheldrick, 2014)'
 
_refine_special_details
;
 ?
;
_refine_ls_structure_factor_coef  Fsqd
_refine_ls_matrix_type            full
_refine_ls_weighting_scheme       calc
_refine_ls_weighting_details
'w=1/[\s^2^(Fo^2^)+(0.0380P)^2^] where P=(Fo^2^+2Fc^2^)/3'
_atom_sites_solution_primary      ?
_atom_sites_solution_secondary    ?
_atom_sites_solution_hydrogens    geom
_refine_ls_hydrogen_treatment     constr
_refine_ls_extinction_method      none
_refine_ls_extinction_coef        .
_refine_ls_number_reflns          7671
_refine_ls_number_parameters      451
_refine_ls_number_restraints      6
_refine_ls_R_factor_all           0.0604
_refine_ls_R_factor_gt            0.0352
_refine_ls_wR_factor_ref          0.0823
_refine_ls_wR_factor_gt           0.0672
_refine_ls_goodness_of_fit_ref    1.109
_refine_ls_restrained_S_all       1.109
_refine_ls_shift/su_max           0.003
_refine_ls_shift/su_mean          0.000
 
loop_
 _atom_site_label
 _atom_site_type_symbol
 _atom_site_fract_x
 _atom_site_fract_y
 _atom_site_fract_z
 _atom_site_U_iso_or_equiv
 _atom_site_adp_type
 _atom_site_occupancy
 _atom_site_site_symmetry_order  
 _atom_site_calc_flag
 _atom_site_refinement_flags_posn
 _atom_site_refinement_flags_adp
 _atom_site_refinement_flags_occupancy
 _atom_site_disorder_assembly
 _atom_site_disorder_group
Cd1 Cd 0.06238(3) 0.25946(3) 0.25531(2) 0.00625(7) Uani 1 1 d . . . . .
Cd2 Cd 0.50066(3) 0.76762(3) 0.76856(2) 0.00628(7) Uani 1 1 d . . . . .
C1A C 0.0246(4) 0.5773(4) 0.36267(18) 0.0103(7) Uani 1 1 d . . . . .
H1A H -0.0452 0.6024 0.3316 0.012 Uiso 1 1 calc R U . . .
C1B C 0.4394(4) 0.4329(4) 0.65787(18) 0.0100(7) Uani 1 1 d . . . . .
H1B H 0.3659 0.4653 0.6312 0.012 Uiso 1 1 calc R U . . .
C1C C 0.5161(4) 1.1187(4) 0.86265(18) 0.0094(7) Uani 1 1 d . . . . .
H1C H 0.5953 1.1065 0.8928 0.011 Uiso 1 1 calc R U . . .
C1D C 0.0687(4) -0.0745(4) 0.14258(17) 0.0087(7) Uani 1 1 d . . . . .
H1D H 0.1522 -0.1023 0.1650 0.010 Uiso 1 1 calc R U . . .
C2A C 0.1721(4) 0.5814(4) 0.45768(17) 0.0085(7) Uani 1 1 d . . . . .
C2B C 0.5971(4) 0.2886(4) 0.69598(17) 0.0085(7) Uani 1 1 d . . . . .
C2C C 0.3335(4) 1.2172(4) 0.81206(17) 0.0069(7) Uani 1 1 d . . . . .
C2D C -0.1192(4) -0.0700(4) 0.06437(17) 0.0070(7) Uani 1 1 d . . . . .
C3A C 0.0622(4) 0.6582(4) 0.43212(17) 0.0085(7) Uani 1 1 d . . . . .
C3B C 0.4856(4) 0.2862(4) 0.64336(17) 0.0083(7) Uani 1 1 d . . . . .
C3C C 0.4490(4) 1.2533(4) 0.86664(17) 0.0072(7) Uani 1 1 d . . . . .
C3D C -0.0002(4) -0.1524(4) 0.07652(17) 0.0080(7) Uani 1 1 d . . . . .
C4A C 0.0094(4) 0.7810(4) 0.47678(18) 0.0124(7) Uani 1 1 d . . . . .
H4A H -0.0613 0.8353 0.4602 0.015 Uiso 1 1 calc R U . . .
C4B C 0.4454(4) 0.1549(4) 0.59088(18) 0.0114(7) Uani 1 1 d . . . . .
H4B H 0.3738 0.1526 0.5545 0.014 Uiso 1 1 calc R U . . .
C4C C 0.4746(4) 1.4005(4) 0.90819(18) 0.0097(7) Uani 1 1 d . . . . .
H4C H 0.5482 1.4258 0.9454 0.012 Uiso 1 1 calc R U . . .
C4D C 0.0276(4) -0.2773(4) 0.02474(18) 0.0103(7) Uani 1 1 d . . . . .
H4D H 0.1035 -0.3359 0.0322 0.012 Uiso 1 1 calc R U . . .
C5A C 0.0648(4) 0.8183(4) 0.54510(18) 0.0105(7) Uani 1 1 d . . . . .
H5A H 0.0274 0.8960 0.5757 0.013 Uiso 1 1 calc R U . . .
C5B C 0.5159(4) 0.0301(4) 0.59536(17) 0.0096(7) Uani 1 1 d . . . . .
H5B H 0.4909 -0.0580 0.5614 0.012 Uiso 1 1 calc R U . . .
C5C C 0.3879(4) 1.5058(4) 0.89224(18) 0.0092(7) Uani 1 1 d . . . . .
H5C H 0.4053 1.6045 0.9183 0.011 Uiso 1 1 calc R U . . .
C5D C -0.0613(4) -0.3095(4) -0.03707(17) 0.0100(7) Uani 1 1 d . . . . .
H5D H -0.0427 -0.3894 -0.0722 0.012 Uiso 1 1 calc R U . . .
C6A C 0.1781(4) 0.7410(4) 0.57038(17) 0.0074(7) Uani 1 1 d . . . . .
C6B C 0.6255(4) 0.0323(4) 0.65033(17) 0.0091(7) Uani 1 1 d . . . . .
C6C C 0.2723(4) 1.4675(4) 0.83678(17) 0.0079(7) Uani 1 1 d . . . . .
C6D C -0.1801(4) -0.2239(4) -0.04830(17) 0.0073(7) Uani 1 1 d . . . . .
C7A C 0.2359(4) 0.6242(4) 0.52685(17) 0.0085(7) Uani 1 1 d . . . . .
H7A H 0.3133 0.5761 0.5425 0.010 Uiso 1 1 calc R U . . .
C7B C 0.6693(4) 0.1612(4) 0.70096(18) 0.0090(7) Uani 1 1 d . . . . .
H7B H 0.7428 0.1639 0.7366 0.011 Uiso 1 1 calc R U . . .
C7C C 0.2402(4) 1.3221(4) 0.79737(17) 0.0081(7) Uani 1 1 d . . . . .
H7C H 0.1607 1.2952 0.7628 0.010 Uiso 1 1 calc R U . . .
C7D C -0.2133(4) -0.1049(4) 0.00263(17) 0.0080(7) Uani 1 1 d . . . . .
H7D H -0.2939 -0.0509 -0.0038 0.010 Uiso 1 1 calc R U . . .
C8A C 0.2300(4) 0.7841(4) 0.64676(17) 0.0072(7) Uani 1 1 d . . . . .
C8B C 0.6925(4) -0.1129(4) 0.65152(18) 0.0083(7) Uani 1 1 d . . . . .
C8C C 0.1951(4) 1.5916(4) 0.81602(17) 0.0077(7) Uani 1 1 d . U . . .
C8D C -0.2660(4) -0.2535(4) -0.11839(18) 0.0084(7) Uani 1 1 d . . . . .
N1A N 0.1953(3) 0.4643(3) 0.40563(14) 0.0091(6) Uani 1 1 d . . . . .
H1A1 H 0.2592 0.4014 0.4086 0.011 Uiso 1 1 calc R U . . .
N1B N 0.6119(3) 0.4288(3) 0.73815(15) 0.0097(6) Uani 1 1 d . . . . .
H1B1 H 0.6736 0.4578 0.7747 0.012 Uiso 1 1 calc R U . . .
N1C N 0.3396(3) 1.0722(3) 0.77884(14) 0.0071(6) Uani 1 1 d . . . . .
H1C1 H 0.2813 1.0247 0.7430 0.009 Uiso 1 1 calc R U . . .
N1D N -0.1172(3) 0.0458(3) 0.12047(14) 0.0081(6) Uani 1 1 d . . . . .
H1D1 H -0.1803 0.1116 0.1252 0.010 Uiso 1 1 calc R U . . .
N2A N 0.1033(3) 0.4607(3) 0.34839(14) 0.0088(6) Uani 1 1 d . . . . .
N2B N 0.5162(3) 0.5172(3) 0.71494(15) 0.0081(6) Uani 1 1 d . . . . .
N2C N 0.4504(3) 1.0125(3) 0.80984(15) 0.0083(6) Uani 1 1 d . . . . .
N2D N -0.0024(3) 0.0433(3) 0.16789(15) 0.0083(6) Uani 1 1 d . . . . .
O1A O 0.3576(3) 0.7477(3) 0.66463(12) 0.0102(5) Uani 1 1 d . . . . .
O1B O 0.7300(3) -0.1389(2) 0.71244(12) 0.0078(5) Uani 1 1 d . . . . .
O1C O 0.0644(3) 1.5597(3) 0.78531(12) 0.0122(5) Uani 1 1 d . . . . .
O1D O -0.3785(3) -0.1832(3) -0.12415(12) 0.0127(5) Uani 1 1 d . . . . .
O2A O 0.1423(3) 0.8557(2) 0.68864(12) 0.0084(5) Uani 1 1 d . . . . .
O2B O 0.7055(3) -0.1978(3) 0.59491(13) 0.0152(6) Uani 1 1 d . . . . .
O2C O 0.2742(3) 1.7241(3) 0.83004(12) 0.0103(5) Uani 1 1 d . . . . .
O2D O -0.2178(3) -0.3453(3) -0.16869(12) 0.0110(5) Uani 1 1 d . . . . .
 
loop_
 _atom_site_aniso_label
 _atom_site_aniso_U_11
 _atom_site_aniso_U_22
 _atom_site_aniso_U_33
 _atom_site_aniso_U_23
 _atom_site_aniso_U_13
 _atom_site_aniso_U_12
Cd1 0.00757(13) 0.00572(12) 0.00462(12) -0.00133(9) -0.00058(9) 0.00142(9)
Cd2 0.00805(13) 0.00494(12) 0.00560(13) -0.00095(9) -0.00089(9) 0.00299(9)
C1A 0.0127(19) 0.0123(17) 0.0066(17) 0.0002(13) -0.0009(14) 0.0072(14)
C1B 0.0099(18) 0.0120(17) 0.0090(17) 0.0028(14) -0.0004(14) 0.0032(14)
C1C 0.0065(17) 0.0125(17) 0.0094(17) 0.0025(14) -0.0003(14) 0.0018(14)
C1D 0.0108(18) 0.0076(16) 0.0082(17) 0.0015(13) -0.0014(14) 0.0033(13)
C2A 0.0106(18) 0.0078(16) 0.0066(16) 0.0003(13) 0.0010(13) 0.0015(13)
C2B 0.0095(17) 0.0066(16) 0.0099(17) 0.0022(13) 0.0025(14) 0.0018(13)
C2C 0.0079(17) 0.0049(15) 0.0076(16) 0.0009(13) 0.0015(13) 0.0007(13)
C2D 0.0080(17) 0.0057(15) 0.0069(16) 0.0005(12) 0.0020(13) 0.0009(13)
C3A 0.0079(17) 0.0091(16) 0.0080(16) 0.0023(13) 0.0006(13) -0.0009(13)
C3B 0.0095(17) 0.0082(16) 0.0079(16) 0.0019(13) 0.0009(13) 0.0037(13)
C3C 0.0074(17) 0.0088(16) 0.0055(16) 0.0020(13) 0.0009(13) 0.0006(13)
C3D 0.0107(18) 0.0089(16) 0.0049(16) 0.0021(13) 0.0015(13) 0.0024(13)
C4A 0.0159(19) 0.0127(18) 0.0097(17) 0.0009(14) -0.0035(14) 0.0083(15)
C4B 0.0163(19) 0.0100(17) 0.0082(17) 0.0010(13) -0.0021(14) 0.0042(14)
C4C 0.0105(18) 0.0105(17) 0.0085(17) 0.0016(13) -0.0021(14) 0.0032(14)
C4D 0.0120(18) 0.0084(17) 0.0118(18) 0.0023(14) -0.0012(14) 0.0059(14)
C5A 0.0143(19) 0.0069(16) 0.0100(17) -0.0015(13) 0.0004(14) 0.0053(14)
C5B 0.0135(18) 0.0073(16) 0.0069(16) -0.0009(13) -0.0001(14) 0.0004(14)
C5C 0.0120(18) 0.0052(16) 0.0106(17) 0.0010(13) -0.0001(14) 0.0029(13)
C5D 0.0159(19) 0.0080(16) 0.0052(16) -0.0009(13) 0.0005(14) 0.0016(14)
C6A 0.0079(17) 0.0082(16) 0.0057(16) 0.0001(13) -0.0005(13) 0.0016(13)
C6B 0.0124(18) 0.0075(16) 0.0089(17) 0.0031(13) 0.0046(14) 0.0041(13)
C6C 0.0083(17) 0.0087(16) 0.0067(16) 0.0014(13) 0.0017(13) 0.0019(13)
C6D 0.0082(17) 0.0062(16) 0.0067(16) 0.0020(13) -0.0008(13) -0.0026(13)
C7A 0.0109(18) 0.0083(16) 0.0067(16) 0.0008(13) -0.0003(13) 0.0038(13)
C7B 0.0104(18) 0.0100(16) 0.0071(16) 0.0026(13) 0.0000(13) 0.0014(13)
C7C 0.0074(17) 0.0095(16) 0.0073(16) 0.0033(13) -0.0005(13) -0.0016(13)
C7D 0.0044(16) 0.0095(16) 0.0100(17) 0.0022(13) 0.0005(13) -0.0004(13)
C8A 0.0116(18) 0.0033(15) 0.0070(16) 0.0027(12) 0.0018(13) 0.0001(13)
C8B 0.0069(17) 0.0074(16) 0.0104(17) 0.0017(13) 0.0001(13) 0.0008(13)
C8C 0.0089(10) 0.0075(10) 0.0072(10) 0.0012(8) 0.0020(8) 0.0030(8)
C8D 0.0095(17) 0.0058(16) 0.0088(17) 0.0019(13) 0.0004(14) -0.0028(13)
N1A 0.0109(15) 0.0088(14) 0.0069(14) -0.0026(11) -0.0026(12) 0.0049(12)
N1B 0.0120(16) 0.0085(14) 0.0083(14) -0.0001(11) -0.0018(12) 0.0030(12)
N1C 0.0094(15) 0.0076(14) 0.0044(13) 0.0000(11) -0.0033(11) 0.0034(11)
N1D 0.0091(15) 0.0079(14) 0.0073(14) -0.0015(11) -0.0006(11) 0.0052(11)
N2A 0.0121(16) 0.0087(14) 0.0049(14) 0.0002(11) -0.0027(12) 0.0011(12)
N2B 0.0092(15) 0.0071(14) 0.0084(14) 0.0016(11) 0.0010(12) 0.0029(11)
N2C 0.0100(15) 0.0070(14) 0.0090(14) 0.0024(11) 0.0015(12) 0.0039(11)
N2D 0.0078(15) 0.0076(14) 0.0081(14) 0.0003(11) -0.0023(11) -0.0010(11)
O1A 0.0112(13) 0.0123(12) 0.0071(12) -0.0004(10) -0.0020(10) 0.0048(10)
O1B 0.0080(12) 0.0069(11) 0.0095(12) 0.0018(9) -0.0008(10) 0.0043(9)
O1C 0.0134(14) 0.0129(13) 0.0108(12) 0.0014(10) -0.0036(10) 0.0055(10)
O1D 0.0129(13) 0.0145(13) 0.0105(12) 0.0009(10) -0.0054(10) 0.0044(10)
O2A 0.0090(13) 0.0073(12) 0.0077(12) -0.0019(9) 0.0020(10) 0.0010(9)
O2B 0.0216(15) 0.0117(13) 0.0129(13) -0.0009(10) 0.0011(11) 0.0088(11)
O2C 0.0095(13) 0.0074(12) 0.0153(13) 0.0030(10) 0.0040(10) 0.0042(10)
O2D 0.0147(13) 0.0095(12) 0.0063(12) -0.0015(10) 0.0004(10) -0.0019(10)
 
_geom_special_details
;
 All esds (except the esd in the dihedral angle between two l.s. planes)
 are estimated using the full covariance matrix.  The cell esds are taken
 into account individually in the estimation of esds in distances, angles
 and torsion angles; correlations between esds in cell parameters are only
 used when they are defined by crystal symmetry.  An approximate (isotropic)
 treatment of cell esds is used for estimating esds involving l.s. planes.
;
 
loop_
 _geom_bond_atom_site_label_1
 _geom_bond_atom_site_label_2
 _geom_bond_distance
 _geom_bond_site_symmetry_2
 _geom_bond_publ_flag
Cd1 N2A 2.293(3) . ?
Cd1 N2D 2.329(3) . ?
Cd1 O2A 2.332(2) 2_566 ?
Cd1 O1C 2.346(2) 2_576 ?
Cd1 O2D 2.358(2) 2 ?
Cd1 O1B 2.374(2) 2_656 ?
Cd2 O1D 2.258(2) 1_666 ?
Cd2 N2C 2.316(3) . ?
Cd2 O1A 2.320(2) . ?
Cd2 N2B 2.332(3) . ?
Cd2 O2C 2.349(2) 1_545 ?
Cd2 O1B 2.419(2) 1_565 ?
C1A N2A 1.327(4) . ?
C1A C3A 1.416(5) . ?
C1B N2B 1.330(4) . ?
C1B C3B 1.421(4) . ?
C1C N2C 1.325(4) . ?
C1C C3C 1.415(4) . ?
C1D N2D 1.327(4) . ?
C1D C3D 1.420(5) . ?
C2A N1A 1.359(4) . ?
C2A C3A 1.397(4) . ?
C2A C7A 1.408(5) . ?
C2B N1B 1.362(4) . ?
C2B C3B 1.394(5) . ?
C2B C7B 1.408(4) . ?
C2C N1C 1.357(4) . ?
C2C C7C 1.399(4) . ?
C2C C3C 1.409(4) . ?
C2D N1D 1.358(4) . ?
C2D C7D 1.400(4) . ?
C2D C3D 1.402(4) . ?
C3A C4A 1.411(5) . ?
C3B C4B 1.409(5) . ?
C3C C4C 1.407(5) . ?
C3D C4D 1.415(4) . ?
C4A C5A 1.368(5) . ?
C4B C5B 1.377(4) . ?
C4C C5C 1.373(4) . ?
C4D C5D 1.378(5) . ?
C5A C6A 1.420(4) . ?
C5B C6B 1.417(5) . ?
C5C C6C 1.421(5) . ?
C5D C6D 1.416(5) . ?
C6A C7A 1.382(4) . ?
C6A C8A 1.506(4) . ?
C6B C7B 1.378(5) . ?
C6B C8B 1.517(4) . ?
C6C C7C 1.380(5) . ?
C6C C8C 1.502(4) . ?
C6D C7D 1.383(5) . ?
C6D C8D 1.503(5) . ?
C8A O1A 1.265(4) . ?
C8A O2A 1.275(4) . ?
C8B O2B 1.233(4) . ?
C8B O1B 1.297(4) . ?
C8C O1C 1.247(4) . ?
C8C O2C 1.276(4) . ?
C8D O1D 1.256(4) . ?
C8D O2D 1.275(4) . ?
N1A N2A 1.353(4) . ?
N1B N2B 1.362(4) . ?
N1C N2C 1.356(4) . ?
N1D N2D 1.354(4) . ?
O1B Cd1 2.374(2) 2_656 ?
O1B Cd2 2.419(2) 1_545 ?
O1C Cd1 2.346(2) 2_576 ?
O1D Cd2 2.258(2) 1_444 ?
O2A Cd1 2.332(2) 2_566 ?
O2C Cd2 2.349(2) 1_565 ?
O2D Cd1 2.358(2) 2 ?
 
loop_
 _geom_angle_atom_site_label_1
 _geom_angle_atom_site_label_2
 _geom_angle_atom_site_label_3
 _geom_angle
 _geom_angle_site_symmetry_1
 _geom_angle_site_symmetry_3
 _geom_angle_publ_flag
N2A Cd1 N2D 173.40(10) . . ?
N2A Cd1 O2A 90.31(9) . 2_566 ?
N2D Cd1 O2A 83.09(9) . 2_566 ?
N2A Cd1 O1C 78.08(9) . 2_576 ?
N2D Cd1 O1C 102.89(9) . 2_576 ?
O2A Cd1 O1C 99.08(8) 2_566 2_576 ?
N2A Cd1 O2D 103.31(9) . 2 ?
N2D Cd1 O2D 83.16(9) . 2 ?
O2A Cd1 O2D 162.54(8) 2_566 2 ?
O1C Cd1 O2D 73.64(8) 2_576 2 ?
N2A Cd1 O1B 95.49(9) . 2_656 ?
N2D Cd1 O1B 85.83(9) . 2_656 ?
O2A Cd1 O1B 101.09(8) 2_566 2_656 ?
O1C Cd1 O1B 158.86(9) 2_576 2_656 ?
O2D Cd1 O1B 88.58(8) 2 2_656 ?
O1D Cd2 N2C 79.57(9) 1_666 . ?
O1D Cd2 O1A 171.45(8) 1_666 . ?
N2C Cd2 O1A 92.24(9) . . ?
O1D Cd2 N2B 108.91(9) 1_666 . ?
N2C Cd2 N2B 170.76(10) . . ?
O1A Cd2 N2B 79.11(9) . . ?
O1D Cd2 O2C 84.27(9) 1_666 1_545 ?
N2C Cd2 O2C 78.08(9) . 1_545 ?
O1A Cd2 O2C 91.70(9) . 1_545 ?
N2B Cd2 O2C 98.75(9) . 1_545 ?
O1D Cd2 O1B 93.63(9) 1_666 1_565 ?
N2C Cd2 O1B 91.41(9) . 1_565 ?
O1A Cd2 O1B 88.97(8) . 1_565 ?
N2B Cd2 O1B 91.68(9) . 1_565 ?
O2C Cd2 O1B 169.48(8) 1_545 1_565 ?
N2A C1A C3A 110.2(3) . . ?
N2B C1B C3B 110.4(3) . . ?
N2C C1C C3C 110.4(3) . . ?
N2D C1D C3D 110.6(3) . . ?
N1A C2A C3A 107.5(3) . . ?
N1A C2A C7A 130.2(3) . . ?
C3A C2A C7A 122.3(3) . . ?
N1B C2B C3B 106.8(3) . . ?
N1B C2B C7B 130.6(3) . . ?
C3B C2B C7B 122.5(3) . . ?
N1C C2C C7C 130.3(3) . . ?
N1C C2C C3C 107.0(3) . . ?
C7C C2C C3C 122.6(3) . . ?
N1D C2D C7D 129.6(3) . . ?
N1D C2D C3D 107.3(3) . . ?
C7D C2D C3D 123.0(3) . . ?
C2A C3A C4A 119.7(3) . . ?
C2A C3A C1A 104.5(3) . . ?
C4A C3A C1A 135.6(3) . . ?
C2B C3B C4B 120.2(3) . . ?
C2B C3B C1B 105.0(3) . . ?
C4B C3B C1B 134.8(3) . . ?
C4C C3C C2C 119.6(3) . . ?
C4C C3C C1C 135.9(3) . . ?
C2C C3C C1C 104.4(3) . . ?
C2D C3D C4D 119.3(3) . . ?
C2D C3D C1D 104.2(3) . . ?
C4D C3D C1D 136.4(3) . . ?
C5A C4A C3A 118.4(3) . . ?
C5B C4B C3B 117.6(3) . . ?
C5C C4C C3C 118.0(3) . . ?
C5D C4D C3D 118.0(3) . . ?
C4A C5A C6A 121.4(3) . . ?
C4B C5B C6B 121.7(3) . . ?
C4C C5C C6C 121.5(3) . . ?
C4D C5D C6D 121.6(3) . . ?
C7A C6A C5A 121.1(3) . . ?
C7A C6A C8A 120.1(3) . . ?
C5A C6A C8A 118.7(3) . . ?
C7B C6B C5B 121.4(3) . . ?
C7B C6B C8B 121.2(3) . . ?
C5B C6B C8B 117.4(3) . . ?
C7C C6C C5C 121.4(3) . . ?
C7C C6C C8C 119.2(3) . . ?
C5C C6C C8C 119.0(3) . . ?
C7D C6D C5D 121.4(3) . . ?
C7D C6D C8D 118.2(3) . . ?
C5D C6D C8D 120.3(3) . . ?
C6A C7A C2A 116.9(3) . . ?
C6B C7B C2B 116.6(3) . . ?
C6C C7C C2C 116.6(3) . . ?
C6D C7D C2D 116.6(3) . . ?
O1A C8A O2A 124.7(3) . . ?
O1A C8A C6A 117.8(3) . . ?
O2A C8A C6A 117.5(3) . . ?
O2B C8B O1B 125.1(3) . . ?
O2B C8B C6B 117.8(3) . . ?
O1B C8B C6B 117.1(3) . . ?
O1C C8C O2C 124.8(3) . . ?
O1C C8C C6C 119.6(3) . . ?
O2C C8C C6C 115.5(3) . . ?
O1D C8D O2D 124.1(3) . . ?
O1D C8D C6D 117.8(3) . . ?
O2D C8D C6D 118.0(3) . . ?
N2A N1A C2A 110.3(3) . . ?
N2B N1B C2B 111.2(3) . . ?
N2C N1C C2C 110.7(3) . . ?
N2D N1D C2D 110.8(3) . . ?
C1A N2A N1A 107.5(3) . . ?
C1A N2A Cd1 127.8(2) . . ?
N1A N2A Cd1 123.7(2) . . ?
C1B N2B N1B 106.6(3) . . ?
C1B N2B Cd2 129.1(2) . . ?
N1B N2B Cd2 124.3(2) . . ?
C1C N2C N1C 107.4(3) . . ?
C1C N2C Cd2 130.8(2) . . ?
N1C N2C Cd2 121.8(2) . . ?
C1D N2D N1D 107.0(3) . . ?
C1D N2D Cd1 133.9(2) . . ?
N1D N2D Cd1 117.1(2) . . ?
C8A O1A Cd2 136.5(2) . . ?
C8B O1B Cd1 129.0(2) . 2_656 ?
C8B O1B Cd2 110.3(2) . 1_545 ?
Cd1 O1B Cd2 107.96(8) 2_656 1_545 ?
C8C O1C Cd1 122.9(2) . 2_576 ?
C8D O1D Cd2 115.5(2) . 1_444 ?
C8A O2A Cd1 124.6(2) . 2_566 ?
C8C O2C Cd2 117.8(2) . 1_565 ?
C8D O2D Cd1 122.0(2) . 2 ?
 
_refine_diff_density_max    1.062
_refine_diff_density_min   -1.046
_refine_diff_density_rms    0.268

_shelxl_version_number 2014-3

_shelx_res_file
;
TITL mo_AGV187_0m in P-1
CELL  0.71069   8.7080   9.0640  19.4510  101.089   90.961   98.063
ZERR     2.00   0.0004   0.0003   0.0007    0.001    0.002    0.001
LATT   1
SFAC  C    H    N    O    CD
UNIT  64   40   16   16   4
MERG   2
acta
FMAP   2
PLAN   10
isor 0.001 c8c
LIST   1
L.S.  20
WGHT    0.038000
FVAR       0.07415
CD1   5    0.062380    0.259463    0.255311    11.00000    0.00757    0.00572 =
         0.00462   -0.00133   -0.00058    0.00142
CD2   5    0.500657    0.767617    0.768561    11.00000    0.00805    0.00494 =
         0.00560   -0.00095   -0.00089    0.00299
C1A   1    0.024586    0.577347    0.362671    11.00000    0.01271    0.01229 =
         0.00663    0.00015   -0.00088    0.00722
AFIX  43
H1A   2   -0.045159    0.602366    0.331587    11.00000   -1.20000
AFIX   0
C1B   1    0.439394    0.432886    0.657875    11.00000    0.00987    0.01199 =
         0.00899    0.00284   -0.00043    0.00315
AFIX  43
H1B   2    0.365884    0.465328    0.631240    11.00000   -1.20000
AFIX   0
C1C   1    0.516143    1.118733    0.862647    11.00000    0.00652    0.01249 =
         0.00940    0.00253   -0.00029    0.00181
AFIX  43
H1C   2    0.595292    1.106540    0.892839    11.00000   -1.20000
AFIX   0
C1D   1    0.068741   -0.074510    0.142576    11.00000    0.01079    0.00756 =
         0.00824    0.00150   -0.00136    0.00331
AFIX  43
H1D   2    0.152211   -0.102282    0.165002    11.00000   -1.20000
AFIX   0
C2A   1    0.172085    0.581449    0.457684    11.00000    0.01065    0.00776 =
         0.00658    0.00028    0.00096    0.00154
C2B   1    0.597109    0.288579    0.695981    11.00000    0.00946    0.00661 =
         0.00986    0.00221    0.00248    0.00181
C2C   1    0.333461    1.217210    0.812063    11.00000    0.00786    0.00491 =
         0.00763    0.00087    0.00153    0.00069
C2D   1   -0.119240   -0.069986    0.064368    11.00000    0.00799    0.00566 =
         0.00693    0.00046    0.00195    0.00095
C3A   1    0.062202    0.658204    0.432123    11.00000    0.00785    0.00913 =
         0.00801    0.00226    0.00056   -0.00090
C3B   1    0.485611    0.286169    0.643360    11.00000    0.00950    0.00825 =
         0.00794    0.00191    0.00087    0.00369
C3C   1    0.448974    1.253304    0.866640    11.00000    0.00736    0.00884 =
         0.00554    0.00198    0.00088    0.00056
C3D   1   -0.000202   -0.152354    0.076523    11.00000    0.01067    0.00894 =
         0.00488    0.00214    0.00152    0.00239
C4A   1    0.009407    0.780987    0.476781    11.00000    0.01595    0.01269 =
         0.00967    0.00090   -0.00347    0.00828
AFIX  43
H4A   2   -0.061323    0.835271    0.460197    11.00000   -1.20000
AFIX   0
C4B   1    0.445410    0.154908    0.590878    11.00000    0.01627    0.01005 =
         0.00822    0.00100   -0.00209    0.00421
AFIX  43
H4B   2    0.373843    0.152636    0.554522    11.00000   -1.20000
AFIX   0
C4C   1    0.474640    1.400515    0.908192    11.00000    0.01049    0.01046 =
         0.00854    0.00158   -0.00210    0.00319
AFIX  43
H4C   2    0.548154    1.425764    0.945373    11.00000   -1.20000
AFIX   0
C4D   1    0.027581   -0.277274    0.024737    11.00000    0.01202    0.00839 =
         0.01177    0.00234   -0.00120    0.00587
AFIX  43
H4D   2    0.103504   -0.335867    0.032173    11.00000   -1.20000
AFIX   0
C5A   1    0.064776    0.818303    0.545103    11.00000    0.01433    0.00691 =
         0.00997   -0.00153    0.00039    0.00531
AFIX  43
H5A   2    0.027375    0.895992    0.575652    11.00000   -1.20000
AFIX   0
C5B   1    0.515925    0.030103    0.595364    11.00000    0.01346    0.00734 =
         0.00688   -0.00090   -0.00009    0.00044
AFIX  43
H5B   2    0.490937   -0.058007    0.561409    11.00000   -1.20000
AFIX   0
C5C   1    0.387945    1.505838    0.892237    11.00000    0.01196    0.00524 =
         0.01060    0.00099   -0.00008    0.00291
AFIX  43
H5C   2    0.405312    1.604498    0.918318    11.00000   -1.20000
AFIX   0
C5D   1   -0.061292   -0.309508   -0.037072    11.00000    0.01588    0.00800 =
         0.00521   -0.00092    0.00051    0.00159
AFIX  43
H5D   2   -0.042721   -0.389426   -0.072246    11.00000   -1.20000
AFIX   0
C6A   1    0.178116    0.740975    0.570376    11.00000    0.00790    0.00822 =
         0.00573    0.00006   -0.00048    0.00158
C6B   1    0.625535    0.032348    0.650334    11.00000    0.01238    0.00753 =
         0.00887    0.00314    0.00465    0.00409
C6C   1    0.272287    1.467514    0.836776    11.00000    0.00834    0.00871 =
         0.00673    0.00141    0.00171    0.00187
C6D   1   -0.180149   -0.223902   -0.048302    11.00000    0.00824    0.00615 =
         0.00671    0.00198   -0.00080   -0.00261
C7A   1    0.235874    0.624218    0.526853    11.00000    0.01087    0.00833 =
         0.00671    0.00084   -0.00026    0.00379
AFIX  43
H7A   2    0.313325    0.576078    0.542517    11.00000   -1.20000
AFIX   0
C7B   1    0.669340    0.161193    0.700958    11.00000    0.01043    0.00996 =
         0.00707    0.00257    0.00000    0.00144
AFIX  43
H7B   2    0.742849    0.163876    0.736588    11.00000   -1.20000
AFIX   0
C7C   1    0.240248    1.322085    0.797374    11.00000    0.00743    0.00950 =
         0.00730    0.00326   -0.00053   -0.00159
AFIX  43
H7C   2    0.160733    1.295150    0.762808    11.00000   -1.20000
AFIX   0
C7D   1   -0.213280   -0.104935    0.002626    11.00000    0.00440    0.00949 =
         0.00996    0.00218    0.00049   -0.00038
AFIX  43
H7D   2   -0.293878   -0.050925   -0.003805    11.00000   -1.20000
AFIX   0
C8A   1    0.229995    0.784121    0.646760    11.00000    0.01162    0.00325 =
         0.00704    0.00271    0.00179    0.00007
C8B   1    0.692456   -0.112931    0.651517    11.00000    0.00694    0.00742 =
         0.01035    0.00168    0.00013    0.00080
C8C   1    0.195080    1.591568    0.816020    11.00000    0.00886    0.00751 =
         0.00717    0.00121    0.00200    0.00304
C8D   1   -0.266025   -0.253509   -0.118394    11.00000    0.00946    0.00579 =
         0.00884    0.00192    0.00043   -0.00284
N1A   3    0.195257    0.464311    0.405632    11.00000    0.01091    0.00876 =
         0.00685   -0.00259   -0.00264    0.00490
AFIX  43
H1A1  2    0.259244    0.401428    0.408643    11.00000   -1.20000
AFIX   0
N1B   3    0.611873    0.428829    0.738154    11.00000    0.01202    0.00852 =
         0.00834   -0.00011   -0.00178    0.00297
AFIX  43
H1B1  2    0.673643    0.457815    0.774709    11.00000   -1.20000
AFIX   0
N1C   3    0.339645    1.072217    0.778843    11.00000    0.00937    0.00758 =
         0.00435   -0.00002   -0.00328    0.00343
AFIX  43
H1C1  2    0.281321    1.024710    0.743048    11.00000   -1.20000
AFIX   0
N1D   3   -0.117215    0.045756    0.120468    11.00000    0.00910    0.00786 =
         0.00730   -0.00152   -0.00059    0.00517
AFIX  43
H1D1  2   -0.180312    0.111643    0.125227    11.00000   -1.20000
AFIX   0
N2A   3    0.103290    0.460719    0.348386    11.00000    0.01206    0.00867 =
         0.00486    0.00016   -0.00266    0.00109
N2B   3    0.516153    0.517211    0.714937    11.00000    0.00917    0.00712 =
         0.00841    0.00160    0.00099    0.00286
N2C   3    0.450407    1.012541    0.809840    11.00000    0.00996    0.00703 =
         0.00897    0.00245    0.00151    0.00392
N2D   3   -0.002375    0.043339    0.167890    11.00000    0.00780    0.00765 =
         0.00806    0.00026   -0.00234   -0.00104
O1A   4    0.357614    0.747674    0.664633    11.00000    0.01122    0.01227 =
         0.00708   -0.00036   -0.00196    0.00481
O1B   4    0.729975   -0.138860    0.712443    11.00000    0.00799    0.00691 =
         0.00949    0.00176   -0.00080    0.00432
O1C   4    0.064359    1.559712    0.785311    11.00000    0.01339    0.01290 =
         0.01078    0.00143   -0.00364    0.00546
O1D   4   -0.378522   -0.183161   -0.124148    11.00000    0.01294    0.01451 =
         0.01046    0.00091   -0.00541    0.00443
O2A   4    0.142317    0.855745    0.688645    11.00000    0.00896    0.00733 =
         0.00766   -0.00188    0.00204    0.00095
O2B   4    0.705498   -0.197843    0.594910    11.00000    0.02160    0.01167 =
         0.01287   -0.00092    0.00115    0.00880
O2C   4    0.274208    1.724146    0.830038    11.00000    0.00948    0.00743 =
         0.01531    0.00300    0.00396    0.00415
O2D   4   -0.217768   -0.345270   -0.168694    11.00000    0.01469    0.00954 =
         0.00634   -0.00147    0.00039   -0.00189
HKLF    4

REM  mo_AGV187_0m in P-1
REM R1 =  0.0352 for    5938 Fo > 4sig(Fo)  and  0.0604 for all    7671 data
REM    451 parameters refined using      6 restraints

END

WGHT      0.0381      0.0000

REM Highest difference peak  1.062,  deepest hole -1.046,  1-sigma level  0.268
Q1    1   0.3874  1.4357  0.9062  11.00000  0.05    1.06
Q2    1   0.0708  1.3192  0.7803  11.00000  0.05    0.90
Q3    1   0.2873  1.3844  0.9207  11.00000  0.05    0.88
Q4    1   0.6379  0.0422  0.5899  11.00000  0.05    0.87
Q5    1   0.5367  0.1969  0.7422  11.00000  0.05    0.84
Q6    1   0.6178  0.3360  0.8235  11.00000  0.05    0.81
Q7    1   0.2696  0.2195  0.6728  11.00000  0.05    0.78
Q8    1   0.3288  1.4958  0.8619  11.00000  0.05    0.77
Q9    1   0.3765  1.2360  0.8397  11.00000  0.05    0.76
Q10   1   0.6441  1.4809  0.9208  11.00000  0.05    0.75
;
_shelx_res_checksum   34464

_shelx_hkl_file
;
  -1   0   0    1.01    0.16
   1   0   0    0.99    0.17
   1   0   0    1.19    0.15
  -2   0   0  124.15    2.67
  -2   0   0  127.28    2.70
   2   0   0  130.41    2.71
   2   0   0  124.24    2.71
  -3   0   0    7.57    0.50
  -3   0   0    7.46    0.52
   3   0   0    6.80    0.54
   3   0   0    6.83    0.49
  -4   0   0   67.04    1.88
  -4   0   0   66.01    1.85
   4   0   0   64.52    1.93
   4   0   0   66.78    1.91
  -5   0   0   35.33    1.60
  -5   0   0   37.40    1.39
   5   0   0   34.26    1.38
   5   0   0   34.78    1.46
  -6   0   0    3.31    0.56
  -6   0   0    2.93    0.70
  -6   0   0    3.41    0.64
   6   0   0    3.26    0.63
   6   0   0    3.54    0.70
  -7   0   0   69.84    2.37
  -7   0   0   65.58    2.56
  -7   0   0   65.13    2.26
   7   0   0   67.36    2.52
   7   0   0   66.19    2.43
  -8   0   0   -0.28    0.69
  -8   0   0    0.58    0.85
  -8   0   0    1.05    0.64
   8   0   0    1.00    0.88
   8   0   0    1.07    0.75
   8   0   0    0.73    0.88
  -9   0   0   33.29    1.94
  -9   0   0   34.63    2.35
   9   0   0   31.82    2.24
   9   0   0   34.22    2.10
   9   0   0   32.59    2.06
 -10   0   0   -1.65    1.03
 -10   0   0    1.43    1.46
 -10   0   0   -0.18    1.17
  10   0   0    2.87    1.35
  10   0   0    0.57    1.34
  10   0   0    0.22    1.21
 -11   0   0    4.91    2.29
 -11   0   0    6.25    1.67
 -11   0   0    7.45    1.76
  11   0   0    5.33    1.74
  11  -1   0    2.68    1.83
  11  -1   0    7.10    2.02
  11  -1   0    3.39    1.60
 -11   1   0    4.90    2.21
 -11   1   0    1.50    1.29
 -11   1   0    5.19    1.54
  10  -1   0    4.52    1.50
  10  -1   0    3.51    1.23
  10  -1   0    2.09    1.19
 -10   1   0    4.21    1.02
 -10   1   0    2.59    1.51
   9  -1   0    0.43    0.97
   9  -1   0   -0.16    0.78
   9  -1   0    0.05    0.99
  -9   1   0   -0.27    1.05
  -9   1   0   -0.66    0.83
  -9   1   0    0.92    0.77
   8  -1   0    0.99    0.71
   8  -1   0    0.95    0.90
   8  -1   0   -0.37    0.70
  -8   1   0   -0.40    0.52
  -8   1   0    0.47    0.61
  -8   1   0    0.29    0.84
   7  -1   0    7.08    0.92
   7  -1   0    8.61    1.07
  -7   1   0    7.28    1.05
  -7   1   0    9.42    0.86
  -7   1   0    8.68    0.94
   6  -1   0    9.23    0.84
   6  -1   0    9.22    0.95
  -6   1   0   10.34    0.78
  -6   1   0    9.31    0.77
  -6   1   0   13.18    1.07
   5  -1   0   11.35    0.77
   5  -1   0   11.47    0.85
  -5   1   0   12.29    0.73
  -5   1   0   10.62    0.74
  -5   1   0   11.91    0.85
   4  -1   0   13.49    0.71
   4  -1   0   13.77    0.78
  -4   1   0   13.34    0.67
  -4   1   0   13.32    0.79
  -4   1   0   12.85    0.67
   3  -1   0   18.05    0.76
   3  -1   0   17.93    0.72
  -3   1   0   18.56    0.70
  -3   1   0   18.02    0.83
  -3   1   0   17.41    0.68
   2  -1   0    5.53    0.36
   2  -1   0    5.28    0.33
  -2   1   0    5.48    0.31
  -2   1   0    5.26    0.40
  -2   1   0    5.28    0.32
   1  -1   0    4.07    0.21
   1  -1   0    3.74    0.22
   1  -1   0    3.96    0.26
  -1   1   0    3.69    0.22
  -1   1   0    3.99    0.19
  -1   1   0    3.77    0.19
   0  -1   0    0.10    0.10
   0  -1   0   -0.07    0.12
   0   1   0    0.13    0.12
  -1  -1   0   27.06    0.78
  -1  -1   0   27.49    0.80
   1   1   0   26.98    0.78
   1   1   0   27.77    0.81
  -2  -1   0   -0.01    0.15
  -2  -1   0    0.01    0.22
   2   1   0    0.04    0.18
   2   1   0   -0.05    0.22
  -3  -1   0    1.88    0.36
  -3  -1   0    1.87    0.36
   3   1   0    2.03    0.36
   3   1   0    2.01    0.37
  -4  -1   0   20.13    0.98
  -4  -1   0   18.75    0.96
   4   1   0   18.34    0.94
  -5  -1   0   54.54    1.85
  -5  -1   0   55.23    1.89
   5   1   0   55.94    1.98
   5   1   0   54.20    1.90
  -6  -1   0    2.85    0.63
  -6  -1   0    2.37    0.58
   6   1   0    2.84    0.63
   6   1   0    1.04    0.59
  -7  -1   0    0.11    0.68
  -7  -1   0    0.15    0.63
  -7  -1   0    0.29    0.65
   7   1   0    0.63    0.62
   7   1   0    0.90    0.66
  -8  -1   0    5.59    1.19
  -8  -1   0    6.85    1.33
  -8  -1   0    4.86    0.94
   8   1   0    6.38    1.08
   8   1   0    6.37    1.23
   8   1   0    7.12    1.23
  -9  -1   0    8.50    1.52
  -9  -1   0    6.79    1.29
  -9  -1   0    7.04    1.31
   9   1   0    6.06    1.36
   9   1   0    5.41    1.41
   9   1   0    8.17    1.31
 -10  -1   0    5.47    1.46
 -10  -1   0    2.92    1.68
 -10  -1   0    0.54    1.35
  10   1   0    1.65    1.35
  10   1   0    4.36    1.62
  10   1   0    5.05    1.61
 -11  -1   0    3.04    1.79
 -11  -1   0    3.15    1.76
 -11  -1   0    7.04    2.52
  11   1   0    1.62    1.95
  11  -2   0   12.56    2.12
  11  -2   0   13.49    2.11
  11  -2   0   19.88    2.38
 -11   2   0   10.90    1.51
 -11   2   0   14.77    2.56
 -11   2   0   12.55    1.42
  10  -2   0    1.40    1.39
  10  -2   0    1.36    1.31
  10  -2   0   -1.98    1.04
 -10   2   0   -0.08    0.98
 -10   2   0    0.10    1.22
 -10   2   0    0.10    0.82
   9  -2   0   28.65    2.12
   9  -2   0   30.29    1.94
   9  -2   0   29.88    2.17
  -9   2   0   27.24    1.65
  -9   2   0   32.67    2.25
  -9   2   0   29.22    1.54
   8  -2   0    3.26    0.76
   8  -2   0    2.64    0.91
  -8   2   0    2.81    0.72
  -8   2   0    3.66    0.62
   7  -2   0   40.42    1.84
   7  -2   0   40.92    1.76
  -7   2   0   42.45    1.58
  -7   2   0   44.35    1.77
  -7   2   0   43.93    1.98
   6  -2   0    0.03    0.41
   6  -2   0    0.34    0.39
  -6   2   0   -0.02    0.39
  -6   2   0   -0.62    0.28
  -6   2   0    0.93    0.40
   5  -2   0   20.58    0.97
   5  -2   0   19.24    1.20
  -5   2   0   19.34    0.87
  -5   2   0   19.06    1.10
  -5   2   0   19.89    0.85
   4  -2   0   34.26    1.23
   4  -2   0   34.72    1.17
  -4   2   0   34.65    1.33
  -4   2   0   36.07    1.09
  -4   2   0   34.24    1.07
   3  -2   0    1.07    0.27
   3  -2   0    1.12    0.23
  -3   2   0    0.95    0.22
  -3   2   0    0.94    0.18
  -3   2   0    1.35    0.30
   2  -2   0   92.08    2.03
   2  -2   0   92.81    2.02
  -2   2   0   93.26    1.94
  -2   2   0   95.14    2.11
  -2   2   0   90.02    1.94
   1  -2   0    6.73    0.31
   1  -2   0    6.61    0.34
   1  -2   0    6.55    0.35
  -1   2   0    6.97    0.31
  -1   2   0    6.80    0.29
  -1   2   0    6.59    0.32
   0  -2   0  175.18    3.47
   0  -2   0  168.89    3.44
   0   2   0  170.00    3.24
   0   2   0  165.75    3.42
  -1  -2   0    6.39    0.45
  -1  -2   0    6.55    0.46
   1   2   0    5.70    0.40
   1   2   0    6.14    0.47
  -2  -2   0    5.98    0.51
  -2  -2   0    5.98    0.52
   2   2   0    5.17    0.46
   2   2   0    5.16    0.46
  -3  -2   0    4.17    0.50
  -3  -2   0    4.41    0.55
   3   2   0    4.04    0.57
   3   2   0    5.33    0.53
  -4  -2   0   43.86    1.63
  -4  -2   0   43.15    1.59
   4   2   0   44.39    1.65
   4   2   0   45.42    1.63
  -5  -2   0   35.56    1.56
  -5  -2   0   33.96    1.53
   5   2   0   37.22    1.59
   5   2   0   36.67    1.64
  -6  -2   0    1.86    0.61
  -6  -2   0    2.56    0.67
   6   2   0    1.73    0.62
   6   2   0    2.53    0.74
  -7  -2   0   41.61    2.15
  -7  -2   0   41.57    1.96
  -7  -2   0   37.12    1.91
   7   2   0   40.00    2.11
   7   2   0   41.42    2.00
  -8  -2   0    1.37    0.92
  -8  -2   0    0.58    0.98
  -8  -2   0    1.75    0.87
   8   2   0    0.38    0.88
   8   2   0    0.17    0.79
   8   2   0    1.00    0.93
  -9  -2   0   39.61    2.62
  -9  -2   0   35.58    2.37
  -9  -2   0   40.39    2.52
   9   2   0   38.62    2.56
   9   2   0   34.51    2.55
   9   2   0   33.79    2.33
 -10  -2   0   -0.33    1.58
 -10  -2   0   -3.58    1.46
 -10  -2   0    3.81    1.50
  10   2   0    0.13    1.46
  10   2   0    0.07    1.60
  10   2   0    1.44    1.39
 -11  -2   0    8.36    2.10
 -11  -2   0    7.74    2.04
  11  -3   0    4.27    1.90
  11  -3   0    7.21    1.66
  11  -3   0    6.18    1.84
 -11   3   0   12.36    2.25
 -11   3   0    3.83    1.05
 -11   3   0    6.32    0.94
  10  -3   0    3.17    1.19
  10  -3   0    2.75    1.40
  10  -3   0    0.34    1.28
 -10   3   0    0.56    0.72
 -10   3   0    0.57    1.25
 -10   3   0    0.73    0.85
   9  -3   0    3.38    1.15
   9  -3   0    3.40    0.97
   9  -3   0    4.81    1.26
  -9   3   0    3.95    0.79
  -9   3   0    7.12    1.35
  -9   3   0    4.46    0.65
   8  -3   0    3.58    0.79
   8  -3   0    3.68    0.92
  -8   3   0    2.01    0.74
  -8   3   0    2.72    1.03
  -8   3   0    2.44    0.54
   7  -3   0    3.66    0.79
   7  -3   0    4.36    0.69
   7  -3   0    4.44    0.82
  -7   3   0    3.59    0.81
  -7   3   0    3.70    0.53
  -7   3   0    4.20    0.60
   6  -3   0   39.84    1.54
   6  -3   0   40.14    1.63
  -6   3   0   38.82    1.31
  -6   3   0   42.17    1.77
  -6   3   0   40.42    1.28
   5  -3   0    5.19    0.57
   5  -3   0    4.94    0.61
  -5   3   0    5.32    0.44
  -5   3   0    5.71    0.70
  -5   3   0    6.63    0.53
   4  -3   0   24.89    0.96
   4  -3   0   24.77    1.01
  -4   3   0   24.13    0.79
  -4   3   0   25.54    1.08
  -4   3   0   24.14    0.81
   3  -3   0   42.37    1.26
   3  -3   0   41.78    1.23
  -3   3   0   42.51    1.06
  -3   3   0   42.33    1.07
  -3   3   0   43.70    1.32
   2  -3   0   27.40    0.88
   2  -3   0   28.40    0.88
   2  -3   0   27.54    0.87
  -2   3   0   26.50    0.76
  -2   3   0   27.33    0.75
  -2   3   0   28.67    0.85
   1  -3   0    4.42    0.38
   1  -3   0    4.49    0.36
   1  -3   0    4.12    0.26
  -1   3   0    4.43    0.30
  -1   3   0    4.20    0.34
   0  -3   0   19.45    0.78
   0  -3   0   18.85    0.75
   0   3   0   18.64    0.73
   0   3   0   19.17    0.54
   0   3   0   19.81    0.73
  -1  -3   0   27.71    1.01
  -1  -3   0   25.78    0.99
   1   3   0   25.43    0.94
   1   3   0   25.81    0.98
  -2  -3   0   27.65    1.14
  -2  -3   0   28.55    1.15
   2   3   0   27.35    1.13
   2   3   0   29.91    1.12
  -3  -3   0   48.64    1.69
  -3  -3   0   48.83    1.70
   3   3   0   48.46    1.66
   3   3   0   48.39    1.69
  -4  -3   0   13.85    0.99
  -4  -3   0   15.45    1.02
   4   3   0   15.06    1.05
   4   3   0   14.75    0.97
  -5  -3   0   29.51    1.49
  -5  -3   0   27.92    1.47
   5   3   0   29.60    1.43
   5   3   0   27.13    1.52
  -6  -3   0    0.74    0.69
  -6  -3   0    0.08    0.58
   6   3   0    0.33    0.71
   6   3   0    0.15    0.58
  -7  -3   0    1.12    0.88
  -7  -3   0    2.45    0.99
   7   3   0    2.29    0.71
   7   3   0    1.14    0.85
   7   3   0    1.98    0.79
  -8  -3   0    1.44    1.08
  -8  -3   0   -0.05    0.94
  -8  -3   0    0.19    1.01
   8   3   0    0.36    0.99
   8   3   0    1.08    1.13
   8   3   0    0.56    1.03
  -9  -3   0    0.81    1.39
  -9  -3   0    1.32    1.29
  -9  -3   0    2.17    1.36
   9   3   0   -0.22    1.42
   9   3   0    2.26    1.32
   9   3   0   -1.46    1.13
 -10  -3   0   16.06    2.49
 -10  -3   0   15.72    2.24
 -10  -3   0   18.22    2.21
  10   3   0   19.64    2.38
  11  -4   0    9.48    1.98
  11  -4   0    8.67    1.88
  11  -4   0   10.02    2.08
 -11   4   0   12.53    2.39
  10  -4   0    4.09    1.42
  10  -4   0    2.41    1.28
  10  -4   0    1.89    1.34
 -10   4   0    1.47    0.54
 -10   4   0    2.92    0.48
 -10   4   0    1.52    1.44
   9  -4   0   30.12    2.30
   9  -4   0   27.17    2.17
   9  -4   0   36.64    2.30
  -9   4   0   33.49    2.29
  -9   4   0   32.08    1.23
  -9   4   0   32.29    1.14
   8  -4   0    0.23    0.66
   8  -4   0    1.15    0.78
   8  -4   0   -0.06    0.78
  -8   4   0    0.69    0.42
  -8   4   0   -0.10    0.31
  -8   4   0    0.59    0.87
   7  -4   0   27.84    1.61
   7  -4   0   26.20    1.54
   7  -4   0   28.14    1.45
  -7   4   0   28.80    0.96
  -7   4   0   27.86    1.02
  -7   4   0   27.62    1.65
   6  -4   0   13.85    1.05
   6  -4   0   13.39    1.06
   6  -4   0   13.54    0.97
  -6   4   0   13.99    0.65
  -6   4   0   14.08    0.60
  -6   4   0   13.90    1.05
   5  -4   0   20.67    0.99
   5  -4   0   22.52    1.04
  -5   4   0   21.11    0.73
  -5   4   0   21.57    0.70
  -5   4   0   21.97    1.13
   4  -4   0   23.81    0.99
   4  -4   0   24.77    1.05
  -4   4   0   24.21    1.03
  -4   4   0   24.70    0.72
  -4   4   0   25.06    0.70
   3  -4   0    2.75    0.31
   3  -4   0    3.27    0.41
   3  -4   0    2.90    0.39
  -3   4   0    3.11    0.23
  -3   4   0    3.00    0.37
  -3   4   0    3.03    0.27
   2  -4   0  151.22    3.34
   2  -4   0  148.61    3.15
   2  -4   0  157.19    3.36
   2  -4   0  149.18    2.86
  -2   4   0  150.12    3.10
  -2   4   0  149.21    3.09
   1  -4   0    2.98    0.38
   1  -4   0    3.71    0.26
  -1   4   0    4.67    0.40
  -1   4   0    3.91    0.34
   0  -4   0  139.05    3.18
   0  -4   0  137.43    3.14
   0   4   0  136.19    3.06
   0   4   0  135.15    3.05
   0   4   0  128.87    2.70
  -1  -4   0    5.85    0.59
  -1  -4   0    6.22    0.61
   1   4   0    6.74    0.61
   1   4   0    6.55    0.46
   1   4   0    5.87    0.49
  -2  -4   0   38.51    1.49
  -2  -4   0   36.63    1.44
   2   4   0   38.01    1.39
  -3  -4   0    4.12    0.65
  -3  -4   0    4.00    0.66
   3   4   0    3.52    0.62
   3   4   0    3.21    0.54
  -4  -4   0    5.71    0.82
  -4  -4   0    4.71    0.78
   4   4   0    5.42    0.85
   4   4   0    7.03    0.80
  -5  -4   0   27.38    1.60
  -5  -4   0   28.43    1.60
   5   4   0   27.08    1.52
   5   4   0   27.57    1.54
   5   4   0   30.25    1.68
  -6  -4   0    1.45    0.75
  -6  -4   0    2.24    0.82
   6   4   0    0.91    0.69
   6   4   0    0.11    0.82
  -7  -4   0   35.26    2.12
  -7  -4   0   33.35    2.05
  -7  -4   0   33.26    2.11
   7   4   0   33.28    1.98
   7   4   0   33.08    2.15
   7   4   0   33.60    2.10
  -8  -4   0    3.29    1.30
  -8  -4   0   -1.03    1.15
  -8  -4   0    0.89    1.13
   8   4   0    0.54    1.02
   8   4   0    0.20    1.06
   8   4   0    0.17    1.18
  -9  -4   0   19.56    2.48
  -9  -4   0   22.48    2.61
  -9  -4   0   25.93    2.66
   9   4   0   24.53    2.36
   9   4   0   22.57    2.34
   9   4   0   25.12    2.64
 -10  -4   0    5.87    1.96
 -10  -4   0    0.11    2.26
 -10  -4   0   -3.47    2.00
  10   4   0    0.79    1.99
  11  -5   0   10.66    2.08
  11  -5   0    7.61    1.70
  11  -5   0    7.95    2.14
 -11   5   0   11.78    2.52
  10  -5   0    0.74    1.40
  10  -5   0   -2.23    1.22
  10  -5   0    0.66    1.14
 -10   5   0   -2.30    1.34
   9  -5   0    0.45    1.07
   9  -5   0    3.01    1.16
   9  -5   0    2.44    0.91
  -9   5   0    2.68    1.17
   8  -5   0    2.22    0.90
   8  -5   0    1.97    0.73
   8  -5   0    1.11    0.97
  -8   5   0    1.42    0.85
   7  -5   0    2.21    0.63
   7  -5   0    2.82    0.72
   7  -5   0    3.05    0.77
  -7   5   0    2.63    0.78
   6  -5   0   13.78    1.08
   6  -5   0   12.38    0.98
   6  -5   0   14.32    0.99
  -6   5   0   12.92    1.01
   5  -5   0    7.48    0.69
   5  -5   0    6.38    0.76
   5  -5   0    7.96    0.72
  -5   5   0    7.09    0.75
   4  -5   0   30.69    1.24
   4  -5   0   30.58    1.01
   4  -5   0   29.08    1.18
  -4   5   0   28.98    1.14
   3  -5   0    3.11    0.27
   3  -5   0    4.30    0.54
   3  -5   0    4.04    0.49
  -3   5   0    2.93    0.24
  -3   5   0    2.90    0.27
   2  -5   0   36.99    1.04
   2  -5   0   36.82    1.29
   2  -5   0   37.07    1.29
  -2   5   0   34.97    1.03
  -2   5   0   36.34    1.02
   1  -5   0   11.14    0.74
   1  -5   0   10.44    0.42
   1  -5   0   10.79    0.74
  -1   5   0   10.05    0.61
  -1   5   0   11.28    0.58
   0  -5   0    1.60    0.41
   0   5   0    2.16    0.25
   0   5   0    2.26    0.43
   0   5   0    1.60    0.31
  -1  -5   0   21.32    1.12
  -1  -5   0   19.47    1.05
   1   5   0   21.79    1.01
   1   5   0   19.63    0.81
   1   5   0   21.71    1.04
  -2  -5   0    3.31    0.63
  -2  -5   0    2.89    0.60
   2   5   0    4.36    0.60
   2   5   0    4.02    0.63
   2   5   0    3.34    0.50
  -3  -5   0   35.38    1.63
  -3  -5   0   34.23    1.64
   3   5   0   35.03    1.42
   3   5   0   34.49    1.59
   3   5   0   35.93    1.54
  -4  -5   0    2.12    0.70
  -4  -5   0    2.80    0.76
   4   5   0    3.17    0.76
   4   5   0    3.25    0.68
   4   5   0    1.91    0.60
  -5  -5   0    8.71    1.15
  -5  -5   0    7.52    1.11
   5   5   0   10.40    1.17
   5   5   0    8.28    1.04
   5   5   0    9.42    1.26
  -6  -5   0    7.92    1.23
  -6  -5   0    4.79    1.08
   6   5   0    8.07    1.15
   6   5   0    8.50    1.29
   6   5   0    8.40    1.18
  -7  -5   0    4.44    1.26
  -7  -5   0    3.96    1.23
  -7  -5   0    4.35    1.21
   7   5   0    5.61    1.26
   7   5   0    7.52    1.42
   7   5   0    6.29    1.27
  -8  -5   0    6.75    1.62
  -8  -5   0    6.77    1.66
  -8  -5   0    4.53    1.47
   8   5   0    4.56    1.56
   8   5   0    4.24    1.43
   8   5   0    5.77    1.55
  -9  -5   0   -0.63    1.77
  -9  -5   0    2.42    1.75
  -9  -5   0    0.57    1.72
   9   5   0    2.13    1.74
   9   5   0   -0.65    1.54
  10  -6   0    0.59    1.35
  10  -6   0    0.14    1.20
  10  -6   0   -0.28    1.54
 -10   6   0   -1.70    1.45
   9  -6   0   21.51    2.08
   9  -6   0   24.95    2.00
   9  -6   0   27.09    1.89
  -9   6   0   24.42    2.07
   8  -6   0    3.72    1.14
   8  -6   0    3.26    0.88
   8  -6   0    4.96    0.98
  -8   6   0    5.03    1.10
   7  -6   0   31.96    1.56
   7  -6   0   32.68    1.77
   7  -6   0   33.93    1.64
  -7   6   0   34.73    1.75
   6  -6   0    4.87    0.70
   6  -6   0    6.04    0.78
   6  -6   0    5.70    0.83
  -6   6   0    5.69    0.75
   5  -6   0    1.35    0.37
   5  -6   0    1.06    0.52
   5  -6   0    1.62    0.51
  -5   6   0    1.58    0.44
   4  -6   0   16.06    0.96
   4  -6   0   16.10    0.60
   4  -6   0   14.02    0.97
   3  -6   0    1.63    0.49
   3  -6   0    1.63    0.42
  -3   6   0    1.50    0.19
  -3   6   0    1.54    0.17
   2  -6   0   70.36    2.12
  -2   6   0   71.60    1.77
  -2   6   0   72.61    1.76
   1  -6   0    3.25    0.55
   1  -6   0    2.97    0.27
   1  -6   0    3.77    0.53
  -1   6   0    3.02    0.38
  -1   6   0    2.91    0.45
   0  -6   0   75.77    2.31
   0  -6   0   76.03    2.35
   0   6   0   75.40    2.12
   0   6   0   73.65    2.13
   0   6   0   73.58    1.62
  -1  -6   0   -0.50    0.39
  -1  -6   0    0.20    0.43
   1   6   0   -0.03    0.42
   1   6   0    0.05    0.27
  -2  -6   0    9.36    1.03
  -2  -6   0   11.65    1.06
   2   6   0   11.15    0.81
   2   6   0   11.06    1.01
   2   6   0   12.58    1.00
  -3  -6   0    5.88    0.93
  -3  -6   0    5.87    0.93
   3   6   0    5.88    0.82
   3   6   0    3.75    0.69
   3   6   0    4.32    0.80
  -4  -6   0    1.87    0.73
  -4  -6   0    0.87    0.75
   4   6   0    2.68    0.87
   4   6   0    0.85    0.66
   4   6   0    1.37    0.66
  -5  -6   0   34.06    2.04
  -5  -6   0   32.67    2.02
   5   6   0   32.46    1.92
   5   6   0   31.52    1.85
   5   6   0   32.19    2.02
  -6  -6   0    0.42    0.93
  -6  -6   0    0.66    1.00
  -6  -6   0    0.77    1.02
   6   6   0    0.74    0.97
   6   6   0    0.35    1.05
   6   6   0   -0.96    1.00
  -7  -6   0   13.08    1.82
  -7  -6   0   15.04    1.95
  -7  -6   0   19.01    2.11
   7   6   0   17.49    2.07
   7   6   0   15.85    1.89
   7   6   0   14.06    1.85
  -8  -6   0   -1.21    1.54
  -8  -6   0    0.53    1.42
  -8  -6   0   -3.35    1.49
   8   6   0    4.06    1.68
   8   6   0   -1.76    1.53
   8   6   0    1.00    1.53
  -9  -6   0   10.70    2.91
  -9  -6   0    9.70    2.32
  10  -7   0    2.53    1.33
  10  -7   0   -0.45    1.29
  10  -7   0    3.43    1.70
 -10   7   0   -1.28    1.63
   9  -7   0    0.46    1.29
   9  -7   0    1.50    1.03
   9  -7   0    0.08    1.44
  -9   7   0    0.22    1.16
   8  -7   0   11.00    1.36
   8  -7   0   11.15    1.35
   8  -7   0   10.87    1.50
  -8   7   0   13.42    1.40
   7  -7   0    2.07    0.66
   7  -7   0    1.68    0.78
   7  -7   0    1.70    0.73
  -7   7   0    2.88    0.73
   6  -7   0   21.83    1.35
   6  -7   0   21.26    1.05
   6  -7   0   21.26    1.44
  -6   7   0   21.32    1.24
   5  -7   0    0.98    0.28
   5  -7   0    1.20    0.62
   5  -7   0    0.41    0.49
   4  -7   0   37.59    1.59
   4  -7   0   40.16    1.69
   3  -7   0    0.80    0.53
   3  -7   0    1.09    0.47
   2  -7   0    6.21    0.78
   2  -7   0    7.25    0.86
  -2   7   0    6.87    0.48
  -2   7   0    6.51    0.55
   1  -7   0    9.41    0.89
   1  -7   0   10.46    0.36
   1  -7   0   11.31    1.00
  -1   7   0   10.38    0.70
  -1   7   0   11.29    0.80
   0  -7   0    0.35    0.51
   0  -7   0    0.54    0.52
   0   7   0   -0.15    0.36
   0   7   0    0.05    0.13
   0   7   0    0.63    0.52
  -1  -7   0   10.09    1.09
  -1  -7   0   10.89    1.08
   1   7   0   10.83    0.93
   1   7   0   10.53    1.05
   1   7   0   11.14    0.70
  -2  -7   0    3.25    0.84
  -2  -7   0    4.69    0.86
   2   7   0    4.63    0.81
   2   7   0    4.88    0.64
  -3  -7   0   36.62    1.95
  -3  -7   0   33.06    2.21
   3   7   0   36.74    1.80
   3   7   0   36.34    1.61
   3   7   0   36.52    1.92
  -4  -7   0    4.28    1.04
  -4  -7   0    3.32    0.99
   4   7   0    2.56    0.88
   4   7   0    4.20    1.08
  -5  -7   0   15.41    1.87
  -5  -7   0   16.75    1.83
  -5  -7   0   19.46    1.68
   5   7   0   20.63    1.70
   5   7   0   16.02    1.68
   5   7   0   15.31    1.91
  -6  -7   0    2.43    1.25
  -6  -7   0    2.07    1.26
   6   7   0    3.18    1.24
   6   7   0    3.48    1.41
   6   7   0    0.19    1.11
  -7  -7   0    7.32    1.79
  -7  -7   0   10.14    1.62
  -7  -7   0   13.83    1.94
   7   7   0   10.43    1.98
   7   7   0   12.64    1.81
   7   7   0   10.91    1.78
  -8  -7   0    5.40    1.99
  -8  -7   0    5.33    2.47
   8   7   0    5.36    2.28
   8   7   0    8.76    1.96
   9  -8   0   16.02    1.93
   9  -8   0   13.57    1.38
   9  -8   0   14.08    1.65
  -9   8   0   16.32    2.09
   8  -8   0   -0.27    1.08
   8  -8   0    1.42    0.76
   8  -8   0    1.64    1.02
  -8   8   0    0.33    0.93
   7  -8   0   11.66    1.41
   7  -8   0   12.36    1.46
   7  -8   0   13.15    0.97
   6  -8   0    1.83    0.31
   6  -8   0    1.48    0.26
   6  -8   0    1.38    0.71
   6  -8   0    1.36    0.83
   5  -8   0   -0.32    0.73
   5  -8   0    0.25    0.61
   4  -8   0   25.63    1.44
   4  -8   0   29.85    1.60
   3  -8   0    0.28    0.57
   2  -8   0   15.92    1.25
   2  -8   0   15.13    1.23
  -2   8   0   14.92    0.70
  -2   8   0   15.13    0.78
   1  -8   0   11.15    1.16
   1  -8   0   14.30    1.19
  -1   8   0   12.86    0.94
  -1   8   0   13.05    0.80
   0  -8   0   23.55    1.51
   0  -8   0   21.09    0.60
   0  -8   0   21.47    1.51
   0   8   0   22.07    1.30
   0   8   0   20.53    1.17
  -1  -8   0    1.78    0.79
  -1  -8   0    0.36    0.72
   1   8   0    1.27    0.60
   1   8   0    1.36    0.39
   1   8   0    2.09    0.78
  -2  -8   0    7.90    1.21
  -2  -8   0    5.33    1.16
   2   8   0    7.52    0.94
   2   8   0    9.64    1.00
   2   8   0    8.17    1.18
  -3  -8   0   16.10    1.71
  -3  -8   0   13.42    1.57
   3   8   0   15.78    1.47
   3   8   0   12.99    1.51
   3   8   0   17.18    1.31
  -4  -8   0    1.32    1.16
  -4  -8   0    2.90    0.80
  -4  -8   0    0.59    1.12
   4   8   0    2.78    1.11
   4   8   0    2.12    1.23
   4   8   0    1.45    0.96
  -5  -8   0   26.57    2.48
  -5  -8   0   26.60    1.91
  -5  -8   0   27.02    2.41
   5   8   0   23.12    2.16
   5   8   0   24.47    2.35
   5   8   0   26.57    2.39
  -6  -8   0   -2.48    1.55
  -6  -8   0    1.89    1.64
  -6  -8   0   -0.28    1.25
   6   8   0    2.63    1.60
   6   8   0   -0.54    1.54
   6   8   0   -1.74    1.39
  -7  -8   0    6.91    1.85
  -7  -8   0   10.78    2.55
   7   8   0    7.59    2.11
   7   8   0    6.80    2.09
   7   8   0    7.14    3.20
   8  -9   0    9.90    1.49
   8  -9   0    6.05    1.63
   8  -9   0    9.01    0.82
   7  -9   0   -0.45    1.13
   7  -9   0    1.15    1.18
   6  -9   0   23.99    1.72
   6  -9   0   22.99    1.92
   5  -9   0    5.21    1.20
   5  -9   0    6.83    1.06
   4  -9   0   27.26    1.75
   3  -9   0    4.31    0.85
   2  -9   0   12.90    1.39
   2  -9   0    9.90    1.41
  -2   9   0    9.93    0.54
  -2   9   0    9.76    0.62
   1  -9   0    6.96    1.16
   1  -9   0    7.81    1.13
  -1   9   0    6.45    0.76
  -1   9   0    7.37    0.90
   0  -9   0    2.18    0.88
   0   9   0    0.19    0.66
   0   9   0   -0.25    0.57
  -1  -9   0   21.44    1.88
  -1  -9   0   19.39    0.72
  -1  -9   0   22.00    1.80
   1   9   0   20.79    1.44
   1   9   0   19.81    0.79
   1   9   0   22.02    1.62
  -2  -9   0    3.73    1.22
  -2  -9   0    2.45    1.09
  -2  -9   0    3.88    0.56
   2   9   0    3.37    0.97
   2   9   0    2.28    0.64
   2   9   0    2.15    1.06
  -3  -9   0   21.23    1.35
  -3  -9   0   24.27    2.14
  -3  -9   0   30.50    2.36
   3   9   0   24.48    1.67
   3   9   0   21.66    2.08
   3   9   0   27.49    2.03
  -4  -9   0    2.39    1.35
  -4  -9   0    0.27    0.82
  -4  -9   0    1.78    1.43
   4   9   0    0.41    1.39
   4   9   0   -0.78    1.04
  -5  -9   0   17.23    1.92
  -5  -9   0   26.68    2.87
  -5  -9   0   19.59    2.73
   5   9   0   20.00    2.31
   5   9   0   19.76    2.21
   5   9   0   21.30    2.46
  -6  -9   0    2.35    1.45
  -6  -9   0   -2.14    2.67
   6   9   0    3.17    1.73
   6   9   0    0.83    2.02
   6   9   0    2.58    1.92
   7 -10   0    2.81    1.44
   7 -10   0    4.35    1.36
   6 -10   0    0.25    1.10
   6 -10   0    0.49    1.22
   5 -10   0    6.05    1.12
   4 -10   0    3.23    1.18
   4 -10   0    3.97    1.22
   3 -10   0    5.12    1.08
   3 -10   0    4.64    1.18
   2 -10   0   19.35    1.77
   2 -10   0   18.98    1.77
   1 -10   0    8.35    1.22
   1 -10   0    6.14    1.24
  -1  10   0    5.39    0.75
  -1  10   0    5.38    0.65
   0 -10   0   22.12    1.98
   0 -10   0   21.82    2.11
   0  10   0   19.79    1.34
   0  10   0   17.79    1.52
  -1 -10   0   -0.84    1.14
  -1 -10   0    2.24    1.22
   1  10   0    1.78    1.09
   1  10   0    2.88    0.92
  -2 -10   0    2.12    1.35
  -2 -10   0    1.69    0.40
  -2 -10   0    3.42    1.50
   2  10   0    2.40    1.29
   2  10   0    1.98    1.31
   2  10   0    2.42    0.66
  -3 -10   0    3.58    1.63
  -3 -10   0    5.26    0.79
  -3 -10   0    4.51    1.70
   3  10   0    4.44    1.03
   3  10   0    4.41    1.59
   3  10   0    5.91    1.46
  -4 -10   0    1.32    1.89
  -4 -10   0    0.06    0.93
   4  10   0   -1.47    1.67
   4  10   0   -0.68    1.16
   4  10   0   -0.06    1.52
   5  10   0    6.90    1.79
   6 -11   0   33.70    2.66
   5 -11   0   -0.49    1.30
   5 -11   0    1.31    1.48
   4 -11   0    9.19    1.73
   4 -11   0   11.21    1.65
   3 -11   0    2.23    1.31
   3 -11   0    3.70    1.39
   2 -11   0    7.74    1.56
   2 -11   0    8.55    1.55
   1 -11   0   12.77    1.78
   0 -11   0    1.83    1.52
   0 -11   0    0.56    1.44
   0  11   0    1.97    0.87
   0  11   0    3.29    0.91
  -1 -11   0   10.15    1.91
  -1 -11   0   13.27    2.11
   1  11   0   17.18    1.79
   1  11   0   18.11    1.97
  -2 -11   0    0.35    1.87
   2  11   0    0.16    1.43
   2  11   0    2.96    1.46
  -3 -11   0   15.59    2.78
   3  11   0   20.48    2.21
   3  11   0   21.71    2.29
   2 -12   0    8.55    2.09
   2 -12   0   13.63    2.08
   1 -12   0    2.90    2.25
   1 -12   1    5.23    2.13
   1 -12   1    8.51    1.92
   2 -12   1   22.66    2.67
   2 -12   1   21.31    2.40
   3 -12   1    5.28    1.74
   3 -12   1    8.55    1.89
   3  11  -1    6.02    1.71
   3  11  -1    8.41    1.78
  -3 -11   1    6.69    2.30
  -2 -11   1    0.02    1.71
  -2 -11   1   -4.10    1.67
   1  11  -1    0.54    1.06
   1  11  -1   -0.15    0.97
  -1 -11   1    3.37    1.69
  -1 -11   1    1.74    1.53
   0  11  -1   10.25    1.11
   0 -11   1   13.89    1.91
   0 -11   1   10.32    1.80
   1 -11   1    5.12    1.46
   1 -11   1    5.05    1.49
   2 -11   1   24.34    2.22
   2 -11   1   21.93    2.11
   3 -11   1   -0.76    1.20
   3 -11   1   -1.13    1.25
   4 -11   1    8.46    1.59
   4 -11   1    6.23    1.41
   5 -11   1    5.43    1.35
   5 -11   1    7.99    1.53
   6 -11   1    1.36    1.42
   5  10  -1   14.69    2.34
   5  10  -1   14.15    1.78
  -5 -10   1    8.89    1.61
   4  10  -1    2.72    1.74
   4  10  -1   -0.71    1.27
   4  10  -1    4.83    1.60
  -4 -10   1    0.72    0.99
  -4 -10   1   -0.10    1.77
   3  10  -1   18.60    1.66
   3  10  -1   17.05    2.06
   3  10  -1   17.34    2.04
  -3 -10   1   16.95    1.32
  -3 -10   1   13.89    1.98
  -3 -10   1   17.38    2.21
   2  10  -1    1.49    1.06
   2  10  -1    2.67    0.67
   2  10  -1   -0.26    1.16
  -2 -10   1    2.26    1.38
  -2 -10   1    1.48    1.36
  -2 -10   1    0.49    0.49
   1  10  -1   22.95    1.77
  -1 -10   1   23.89    2.15
  -1 -10   1   18.90    2.07
  -1 -10   1   22.09    0.76
  -1 -10   1   22.11    0.74
   0  10  -1    0.77    0.63
   0 -10   1    0.84    1.08
   0 -10   1    0.37    1.05
  -1  10  -1    3.59    0.39
  -1  10  -1    3.38    0.45
   1 -10   1    3.02    1.07
   1 -10   1    4.40    1.15
   2 -10   1    8.09    1.31
   3 -10   1    4.13    1.10
   3 -10   1    4.45    1.11
   4 -10   1   13.89    1.68
   4 -10   1   13.07    1.45
   5 -10   1    1.00    1.11
   6 -10   1   31.87    2.24
   6 -10   1   34.29    2.30
   7 -10   1    0.78    1.19
   7 -10   1   -1.04    1.28
   6   9  -1    0.08    1.84
   6   9  -1    3.03    1.87
   6   9  -1    1.16    1.69
  -6  -9   1    5.25    2.49
  -6  -9   1    0.41    1.53
   5   9  -1   17.51    2.00
   5   9  -1   16.25    1.98
   5   9  -1   14.78    2.10
  -5  -9   1   18.95    1.95
  -5  -9   1   18.05    2.30
  -5  -9   1   14.27    2.07
   4   9  -1    2.73    1.34
   4   9  -1    1.51    1.16
   4   9  -1    0.90    1.04
  -4  -9   1   -1.88    1.36
  -4  -9   1   -0.95    1.36
  -4  -9   1   -0.92    0.87
   3   9  -1    6.71    1.07
   3   9  -1    5.67    1.26
  -3  -9   1    8.23    1.46
  -3  -9   1    9.43    1.54
   2   9  -1    8.10    1.09
   2   9  -1    7.10    0.96
   2   9  -1    7.79    1.18
  -2  -9   1    7.24    1.32
  -2  -9   1    8.32    1.30
   1   9  -1   -0.27    0.74
   1   9  -1   -0.17    0.63
   1   9  -1    0.28    0.36
  -1  -9   1   -0.74    0.84
  -1  -9   1    0.49    0.88
   0   9  -1   31.21    1.36
   0   9  -1   30.66    1.80
   0  -9   1   33.98    1.93
   0  -9   1   30.64    0.87
   0  -9   1   32.05    1.92
  -1   9  -1    0.10    0.35
  -1   9  -1    0.85    0.45
   1  -9   1    0.37    0.78
   1  -9   1   -0.88    0.70
   2  -9   1    8.75    1.09
   2  -9   1    6.95    1.00
   3  -9   1    3.25    0.89
   3  -9   1    2.00    0.75
   4  -9   1   12.10    1.23
   5  -9   1    0.72    0.89
   5  -9   1    1.51    0.75
   6  -9   1    2.57    1.10
   6  -9   1    2.46    0.86
   7  -9   1   17.90    1.92
   7  -9   1   24.05    1.76
   8  -9   1   -0.74    0.56
   8  -9   1    1.14    1.29
   8  -9   1    0.73    0.51
   8  -9   1   -1.31    1.16
   9  -9   1   18.67    2.26
   9  -9   1   16.47    2.08
   7   8  -1    3.64    1.82
   7   8  -1    3.41    1.93
   7   8  -1    4.15    2.00
  -7  -8   1    8.79    2.42
  -7  -8   1    4.97    1.74
   6   8  -1    0.28    1.40
   6   8  -1    2.41    1.59
   6   8  -1    2.43    1.48
  -6  -8   1   -0.78    1.53
  -6  -8   1    3.68    1.71
  -6  -8   1    1.26    1.23
   5   8  -1   16.74    2.11
   5   8  -1   22.83    2.19
   5   8  -1   19.42    2.00
  -5  -8   1   26.34    2.29
  -5  -8   1   24.61    2.26
   4   8  -1    4.48    1.12
   4   8  -1    3.94    0.96
   4   8  -1    4.87    1.15
  -4  -8   1    3.36    1.22
  -4  -8   1    3.54    1.22
   3   8  -1   18.79    1.95
   3   8  -1   17.90    1.54
   3   8  -1   19.29    1.38
  -3  -8   1   15.12    1.64
  -3  -8   1   15.90    1.70
   2   8  -1    1.87    0.75
   2   8  -1    0.66    0.79
   2   8  -1    0.63    0.83
  -2  -8   1    1.38    0.82
   1   8  -1   29.90    1.10
   1   8  -1   30.45    1.47
   1   8  -1   30.23    1.54
  -1  -8   1   31.63    1.82
   0   8  -1    2.27    0.51
   0  -8   1    2.47    0.79
   0  -8   1    3.07    0.74
  -1   8  -1    8.79    0.64
  -1   8  -1    9.71    0.74
   1  -8   1    8.52    1.00
   1  -8   1    8.73    0.47
   1  -8   1    9.51    1.09
   2  -8   1   34.66    1.63
   2  -8   1   30.13    1.57
   3  -8   1    5.85    0.84
   4  -8   1   31.32    1.56
   4  -8   1   30.20    1.51
   5  -8   1    9.10    0.99
   5  -8   1    8.96    1.09
   6  -8   1   23.66    1.59
   6  -8   1   22.99    0.89
   6  -8   1   23.38    1.43
   6  -8   1   21.33    0.80
   7  -8   1    0.20    0.72
   7  -8   1    1.39    0.58
  -8   8  -1   10.49    1.46
   8  -8   1   12.36    1.50
   8  -8   1    9.01    1.45
   8  -8   1   10.23    1.09
  -9   8  -1   -0.37    1.31
   9  -8   1    3.10    1.34
   9  -8   1    1.80    1.19
   9  -8   1    1.50    1.03
   8   7  -1   -0.37    1.72
   8   7  -1    5.57    2.14
  -8  -7   1    0.28    1.82
  -8  -7   1   -0.94    2.12
   7   7  -1   11.24    1.97
   7   7  -1    9.79    1.93
   7   7  -1   13.32    1.95
  -7  -7   1   13.18    1.99
  -7  -7   1   13.40    1.81
  -7  -7   1   14.02    1.99
   6   7  -1   -0.22    1.12
   6   7  -1    0.86    1.22
   6   7  -1    0.21    1.32
  -6  -7   1   -1.00    1.26
  -6  -7   1    0.59    1.22
   5   7  -1    9.20    1.42
   5   7  -1    9.42    1.32
   5   7  -1    6.84    1.30
  -5  -7   1    5.52    1.31
  -5  -7   1    5.39    1.18
   4   7  -1   -0.43    0.82
   4   7  -1   -0.13    0.72
   4   7  -1   -1.35    0.72
  -4  -7   1    1.63    0.84
  -4  -7   1   -0.49    0.88
   3   7  -1    4.05    0.90
   3   7  -1    4.81    0.77
   3   7  -1    3.23    0.83
  -3  -7   1    5.08    0.99
  -3  -7   1    4.97    1.01
   2   7  -1    9.84    0.96
   2   7  -1    9.72    0.87
   2   7  -1    9.76    1.14
  -2  -7   1    7.85    1.10
  -2  -7   1    7.97    1.06
   1   7  -1    9.79    0.68
   1   7  -1    9.72    0.97
   1   7  -1    8.62    0.83
  -1  -7   1    8.04    1.00
  -1  -7   1    9.75    1.03
   0   7  -1   53.87    1.25
   0   7  -1   57.92    1.77
   0   7  -1   56.36    1.80
   0  -7   1   56.00    2.07
   0  -7   1   53.72    2.00
  -1   7  -1    0.32    0.25
  -1   7  -1   -0.04    0.31
   1  -7   1    0.14    0.22
   1  -7   1    0.21    0.43
   1  -7   1    0.27    0.41
  -2   7  -1   11.34    0.39
  -2   7  -1   10.94    0.46
   2  -7   1   11.23    0.60
   2  -7   1   10.20    0.85
   2  -7   1   12.83    0.97
   3  -7   1    3.76    0.64
   3  -7   1    4.00    0.61
   4  -7   1    6.44    0.78
   4  -7   1    4.87    0.72
   5  -7   1   19.13    1.14
   5  -7   1   18.38    1.21
   5  -7   1   18.60    0.77
  -6   7  -1    4.35    0.71
   6  -7   1    2.27    0.75
   6  -7   1    3.73    0.58
   6  -7   1    3.41    0.69
  -7   7  -1   27.66    1.70
   7  -7   1   28.22    1.53
   7  -7   1   30.63    1.76
   7  -7   1   27.96    1.42
  -8   7  -1    0.59    1.11
   8  -7   1   -0.05    0.82
   8  -7   1    0.56    0.96
   8  -7   1    0.74    0.75
  -9   7  -1   25.89    2.31
   9  -7   1   24.62    2.09
   9  -7   1   24.86    1.98
 -10   7  -1   -1.08    1.57
  10  -7   1    1.41    1.49
  10  -7   1    2.12    1.43
  10  -7   1   -0.16    1.34
   9   6  -1    1.46    3.17
  -9  -6   1   -0.60    2.53
  -9  -6   1    0.44    2.06
   8   6  -1    5.82    1.62
   8   6  -1    6.45    1.76
   8   6  -1    7.45    1.56
  -8  -6   1    4.94    1.82
  -8  -6   1    4.15    1.67
  -8  -6   1    7.53    1.77
   7   6  -1    0.90    1.26
   7   6  -1    1.77    1.25
   7   6  -1    0.54    1.08
  -7  -6   1    0.43    1.23
  -7  -6   1    1.78    1.28
  -7  -6   1    1.46    1.24
   6   6  -1   -1.30    1.05
   6   6  -1   -0.89    0.99
   6   6  -1   -1.47    0.85
  -6  -6   1   -0.06    1.03
  -6  -6   1    0.39    1.05
   5   6  -1    6.84    1.15
   5   6  -1    4.86    1.01
   5   6  -1    5.75    1.11
  -5  -6   1    6.63    1.14
  -5  -6   1    5.47    1.13
   4   6  -1    0.35    0.69
   4   6  -1    1.95    0.66
   4   6  -1    1.40    0.63
  -4  -6   1   -0.58    0.67
  -4  -6   1   -0.06    0.66
   3   6  -1   32.62    1.67
   3   6  -1   33.77    1.51
   3   6  -1   33.18    1.60
  -3  -6   1   35.87    1.78
  -3  -6   1   37.28    1.77
   2   6  -1    2.48    0.50
   2   6  -1    2.65    0.55
   2   6  -1    2.52    0.58
  -2  -6   1    1.96    0.59
  -2  -6   1    4.20    0.74
   1   6  -1   27.45    1.01
   1   6  -1   29.21    1.46
  -1  -6   1   27.21    1.33
  -1  -6   1   26.82    1.35
   0   6  -1    0.56    0.36
   0   6  -1    0.18    0.25
   0   6  -1   -0.09    0.17
   0  -6   1    0.28    0.34
   0  -6   1    0.18    0.36
  -1   6  -1    7.65    0.49
  -1   6  -1    8.01    0.55
   1  -6   1    6.62    0.65
   1  -6   1    7.21    0.47
   1  -6   1    6.89    0.65
  -2   6  -1   23.91    0.63
  -2   6  -1   22.41    0.63
   2  -6   1   23.13    0.85
   2  -6   1   24.25    1.08
   3  -6   1    5.85    0.61
   3  -6   1    6.06    0.66
   4  -6   1   26.75    1.14
   4  -6   1   25.25    0.84
  -5   6  -1   37.72    1.54
   5  -6   1   40.81    1.52
   5  -6   1   38.60    1.31
   5  -6   1   37.16    1.52
  -6   6  -1   30.53    1.46
   6  -6   1   31.20    1.41
   6  -6   1   31.83    1.51
  -7   6  -1    0.44    0.67
   7  -6   1    2.03    0.58
   7  -6   1    0.96    0.62
   7  -6   1    1.72    0.75
  -8   6  -1   20.42    2.07
   8  -6   1   20.65    1.61
   8  -6   1   17.72    1.65
   8  -6   1   18.06    1.39
  -9   6  -1    1.46    1.15
   9  -6   1    0.46    1.10
   9  -6   1   -0.04    1.01
 -10   6  -1   -0.45    1.50
  10  -6   1    0.65    1.26
  10  -6   1    1.37    1.53
  10  -6   1    3.32    1.39
   9   5  -1   16.59    3.74
   9   5  -1   12.29    2.02
   9   5  -1   12.18    1.97
  -9  -5   1   15.48    2.25
  -9  -5   1   10.71    2.04
  -9  -5   1   14.17    2.22
   8   5  -1    2.73    1.51
   8   5  -1    1.05    1.19
   8   5  -1   -1.37    1.36
  -8  -5   1    0.34    1.35
  -8  -5   1    0.42    1.29
  -8  -5   1   -0.21    1.40
   7   5  -1   45.75    2.41
   7   5  -1   46.95    2.63
   7   5  -1   45.92    2.53
  -7  -5   1   53.11    2.63
  -7  -5   1   43.41    2.52
   6   5  -1    3.86    1.10
   6   5  -1    4.04    0.94
   6   5  -1    4.88    1.08
  -6  -5   1    4.69    0.99
  -6  -5   1    5.46    1.10
   5   5  -1   39.31    1.90
   5   5  -1   39.79    1.90
  -5  -5   1   41.34    2.03
  -5  -5   1   35.84    1.95
   4   5  -1   11.48    1.04
   4   5  -1   11.89    1.01
   4   5  -1   12.40    1.16
  -4  -5   1   10.97    1.15
  -4  -5   1   11.66    1.16
   3   5  -1   15.69    1.04
   3   5  -1   15.86    0.98
   3   5  -1   14.31    1.09
  -3  -5   1   15.43    1.13
  -3  -5   1   16.04    1.15
   2   5  -1   63.62    1.96
   2   5  -1   59.08    1.97
   2   5  -1   59.37    1.79
  -2  -5   1   62.29    2.11
  -2  -5   1   58.28    2.02
   1   5  -1   -0.05    0.23
   1   5  -1   -0.02    0.26
   1   5  -1   -0.36    0.30
  -1  -5   1   -0.10    0.33
  -1  -5   1   -0.12    0.33
   0   5  -1   40.27    1.25
   0   5  -1   37.22    1.25
   0   5  -1   39.31    0.99
   0  -5   1   39.30    1.40
   0  -5   1   39.22    1.37
  -1   5  -1    0.18    0.20
  -1   5  -1    0.51    0.18
   1  -5   1   -0.01    0.27
   1  -5   1    0.31    0.28
   1  -5   1    0.57    0.22
  -2   5  -1   72.95    1.49
  -2   5  -1   76.18    1.60
   2  -5   1   70.75    1.93
   2  -5   1   72.31    1.80
   2  -5   1   72.46    1.93
   3  -5   1    4.78    0.48
   3  -5   1    4.85    0.53
   3  -5   1    4.70    0.51
  -4   5  -1    8.59    0.67
   4  -5   1    8.79    0.62
   4  -5   1    8.43    0.67
  -5   5  -1   16.60    1.00
   5  -5   1   15.71    0.88
  -6   5  -1    2.42    0.63
   6  -5   1    0.91    0.45
   6  -5   1    2.33    0.56
  -7   5  -1   24.71    1.55
   7  -5   1   25.97    1.37
   7  -5   1   28.82    1.54
   7  -5   1   27.07    1.46
   8  -5   1    0.79    0.85
   8  -5   1    0.73    0.65
   8  -5   1    0.75    0.84
  -9   5  -1   27.33    2.26
   9  -5   1   28.27    2.75
   9  -5   1   29.74    2.03
   9  -5   1   23.06    1.88
 -10   5  -1    0.95    1.48
  10  -5   1   -0.02    1.39
  10  -5   1   -1.41    1.11
  10  -5   1   -0.08    1.37
 -11   5  -1    7.47    2.27
  11  -5   1    9.27    1.91
  11  -5   1   11.29    2.11
  11  -5   1   10.21    2.23
  10   4  -1    7.80    2.35
 -10  -4   1   10.93    2.17
 -10  -4   1   12.99    2.43
 -10  -4   1   12.18    2.39
   9   4  -1   -0.63    1.31
   9   4  -1   -0.23    1.40
   9   4  -1   -1.04    1.40
  -9  -4   1   -1.55    1.48
  -9  -4   1    2.78    1.50
  -9  -4   1    0.89    1.42
   8   4  -1    2.35    1.24
   8   4  -1    1.55    1.11
   8   4  -1    1.67    1.18
  -8  -4   1    1.46    1.15
  -8  -4   1    1.73    1.23
  -8  -4   1    0.99    1.18
   7   4  -1   22.09    1.82
   7   4  -1   19.99    1.67
   7   4  -1   19.39    1.79
  -7  -4   1   21.89    1.79
  -7  -4   1   17.39    1.66
   6   4  -1   -0.05    0.72
   6   4  -1   -0.11    0.60
  -6  -4   1    1.53    0.85
  -6  -4   1   -0.34    0.67
   5   4  -1   11.21    1.16
   5   4  -1   11.96    1.08
   5   4  -1    9.67    1.03
  -5  -4   1   11.44    1.14
  -5  -4   1   11.74    1.14
   4   4  -1    7.23    0.84
   4   4  -1    8.88    0.94
   4   4  -1    9.49    0.85
  -4  -4   1    7.52    0.92
  -4  -4   1    7.51    0.90
   3   4  -1   81.42    2.46
   3   4  -1   83.93    2.44
  -3  -4   1   81.88    2.50
  -3  -4   1   83.45    2.49
   2   4  -1   13.99    0.87
   2   4  -1   13.96    0.82
   2   4  -1   15.92    0.80
  -2  -4   1   15.47    0.93
  -2  -4   1   15.40    0.91
   1   4  -1    4.93    0.43
   1   4  -1    5.18    0.45
   1   4  -1    4.95    0.52
  -1  -4   1    5.04    0.56
  -1  -4   1    5.78    0.54
   0   4  -1    7.49    0.51
   0   4  -1    6.67    0.34
   0   4  -1    7.11    0.44
   0  -4   1    6.94    0.51
   0  -4   1    6.12    0.50
  -1   4  -1   16.39    0.60
  -1   4  -1   17.89    0.59
   1  -4   1   18.80    0.74
   1  -4   1   16.71    0.62
   2  -4   1   56.68    1.49
   2  -4   1   56.01    1.49
   2  -4   1   59.10    1.51
   2  -4   1   56.95    1.22
  -3   4  -1    0.62    0.21
   3  -4   1    0.10    0.18
   3  -4   1    0.33    0.24
   3  -4   1    0.53    0.30
  -4   4  -1   19.80    0.97
   4  -4   1   20.86    0.86
   4  -4   1   20.54    0.89
  -5   4  -1    1.24    0.43
   5  -4   1    1.29    0.40
   5  -4   1    1.44    0.34
  -6   4  -1   30.89    1.57
   6  -4   1   31.14    1.33
   6  -4   1   30.83    1.39
  -7   4  -1    4.97    0.27
  -7   4  -1    6.12    1.00
   7  -4   1    3.59    0.74
   7  -4   1    5.12    0.78
  -8   4  -1    7.70    0.38
   8  -4   1    8.78    1.18
   8  -4   1    8.34    1.02
   8  -4   1    8.55    1.19
  -9   4  -1    3.58    1.29
   9  -4   1    3.00    1.05
   9  -4   1    3.05    0.98
   9  -4   1    3.85    1.08
 -10   4  -1   -0.81    1.38
  10  -4   1    0.63    1.27
  10  -4   1    1.20    1.33
  10  -4   1    0.61    1.09
 -11   4  -1    9.35    2.20
  11  -4   1    8.57    2.02
  11  -4   1    7.04    1.71
  11  -4   1   10.00    2.14
 -10  -3   1    3.64    1.89
 -10  -3   1    2.66    1.60
 -10  -3   1    2.23    1.68
   9   3  -1   29.28    2.49
   9   3  -1   27.79    2.45
   9   3  -1   24.92    2.29
  -9  -3   1   26.31    2.42
  -9  -3   1   27.91    2.49
  -9  -3   1   23.57    2.39
   8   3  -1    0.71    1.09
   8   3  -1    2.61    1.10
   8   3  -1    0.59    0.95
  -8  -3   1    0.62    0.84
  -8  -3   1    0.69    0.99
  -8  -3   1    1.42    0.97
   7   3  -1   54.46    2.37
   7   3  -1   48.67    2.42
   7   3  -1   48.54    2.35
  -7  -3   1   48.40    2.26
   6   3  -1    1.39    0.57
   6   3  -1    0.10    0.67
   6   3  -1    0.30    0.56
  -6  -3   1    0.45    0.60
  -6  -3   1    1.91    0.68
   5   3  -1   21.71    1.30
   5   3  -1   20.60    1.23
   5   3  -1   20.09    1.31
  -5  -3   1   17.77    1.23
  -5  -3   1   19.64    1.25
   4   3  -1   13.11    0.92
   4   3  -1   14.22    1.01
   4   3  -1   15.36    1.01
  -4  -3   1   13.75    0.98
  -4  -3   1   13.76    0.91
   3   3  -1   18.15    1.00
   3   3  -1   17.22    0.93
   3   3  -1   17.65    0.93
  -3  -3   1   18.30    0.99
  -3  -3   1   16.97    0.97
   2   3  -1   42.55    1.45
   2   3  -1   44.38    1.42
   2   3  -1   44.90    1.38
  -2  -3   1   47.71    1.51
  -2  -3   1   45.99    1.48
   1   3  -1   27.21    0.94
   1   3  -1   27.08    0.88
   1   3  -1   25.94    0.97
  -1  -3   1   27.51    1.00
  -1  -3   1   27.85    1.00
   0   3  -1  112.57    2.47
   0   3  -1  114.59    2.47
   0   3  -1  112.34    2.31
   0  -3   1  116.92    2.56
   0  -3   1  115.18    2.53
  -1   3  -1   33.01    0.79
  -1   3  -1   31.92    0.77
   1  -3   1   32.30    0.91
   1  -3   1   33.13    0.90
   1  -3   1   33.11    0.91
   1  -3   1   32.69    0.70
  -2   3  -1  122.33    2.67
   2  -3   1  117.69    2.53
   2  -3   1  125.24    2.70
   2  -3   1  120.47    2.55
  -3   3  -1    4.40    0.45
   3  -3   1    5.30    0.41
   3  -3   1    4.41    0.50
   3  -3   1    4.60    0.36
  -4   3  -1   13.46    0.45
  -4   3  -1   13.38    0.43
  -4   3  -1   13.74    0.80
   4  -3   1   12.82    0.70
   4  -3   1   13.78    0.66
  -5   3  -1   21.76    0.75
  -5   3  -1   22.18    0.72
  -5   3  -1   21.08    1.13
   5  -3   1   22.75    0.99
   5  -3   1   21.69    1.02
  -6   3  -1   16.14    1.14
  -6   3  -1   16.68    0.70
  -6   3  -1   16.61    0.75
   6  -3   1   16.48    1.07
   6  -3   1   14.94    0.90
  -7   3  -1   66.23    1.85
  -7   3  -1   66.90    1.82
  -7   3  -1   66.76    2.56
   7  -3   1   68.26    2.40
   7  -3   1   69.90    2.28
  -8   3  -1    3.14    0.58
  -8   3  -1    2.22    0.45
   8  -3   1    2.16    0.83
   8  -3   1    3.10    0.81
  -9   3  -1   73.54    3.22
   9  -3   1   78.63    3.07
   9  -3   1   71.74    3.06
 -10   3  -1   -1.39    1.37
 -10   3  -1    1.57    0.89
 -10   3  -1    0.45    0.62
  10  -3   1   -0.14    1.09
  10  -3   1    0.51    1.29
  10  -3   1    1.16    1.32
 -11   3  -1   17.88    2.61
  11  -3   1   19.25    2.31
  11  -3   1   14.11    2.18
  11  -3   1   18.83    2.21
 -11  -2   1    3.96    1.89
 -11  -2   1    2.05    1.90
  10   2  -1    1.00    1.62
  10   2  -1    0.40    1.62
  10   2  -1    1.05    1.39
 -10  -2   1    5.01    1.66
 -10  -2   1    3.66    1.53
 -10  -2   1    1.05    1.69
   9   2  -1    1.29    1.03
   9   2  -1    1.11    1.30
   9   2  -1    2.74    1.08
  -9  -2   1    0.66    1.18
  -9  -2   1    2.68    1.15
  -9  -2   1    1.47    1.33
   8   2  -1    1.71    0.95
   8   2  -1    1.61    0.75
   8   2  -1    2.59    1.02
  -8  -2   1    1.80    0.92
  -8  -2   1    2.72    1.00
  -8  -2   1    0.88    0.92
   7   2  -1    1.11    0.62
   7   2  -1    2.45    0.88
   7   2  -1    1.72    0.66
  -7  -2   1    1.32    0.69
  -7  -2   1    1.97    0.72
   6   2  -1    8.99    1.11
   6   2  -1    9.86    1.15
   6   2  -1    9.04    1.04
  -6  -2   1    8.55    1.04
  -6  -2   1   11.19    1.05
   5   2  -1   15.56    1.11
   5   2  -1   12.44    0.96
  -5  -2   1   14.24    1.00
  -5  -2   1   14.74    1.04
   4   2  -1   22.11    1.16
   4   2  -1   22.59    1.11
  -4  -2   1   23.59    1.14
  -4  -2   1   22.67    1.13
   3   2  -1   30.38    1.16
   3   2  -1   31.30    1.24
  -3  -2   1   29.55    1.17
  -3  -2   1   30.80    1.21
   2   2  -1   12.45    0.66
   2   2  -1   13.54    0.69
   2   2  -1   13.91    0.73
  -2  -2   1   14.74    0.73
  -2  -2   1   13.66    0.71
   1   2  -1    5.51    0.39
   1   2  -1    5.52    0.43
   1   2  -1    5.51    0.40
  -1  -2   1    5.18    0.40
  -1  -2   1    5.28    0.42
   0   2  -1    1.79    0.23
   0   2  -1    2.08    0.19
   0  -2   1    1.88    0.25
   0  -2   1    2.44    0.25
   0  -2   1    2.30    0.19
   1  -2   1    0.17    0.10
   1  -2   1   -0.05    0.10
   1  -2   1    0.05    0.16
  -2   2  -1   20.42    0.74
   2  -2   1   19.00    0.56
   2  -2   1   18.86    0.74
   2  -2   1   19.69    0.58
  -3   2  -1   45.77    1.08
  -3   2  -1   45.13    1.06
  -3   2  -1   46.20    1.42
   3  -2   1   45.87    1.21
   3  -2   1   45.22    1.24
  -4   2  -1   19.91    0.73
  -4   2  -1   22.86    1.04
  -4   2  -1   22.84    0.75
   4  -2   1   22.04    0.91
   4  -2   1   21.15    0.85
  -5   2  -1    7.26    0.55
  -5   2  -1    6.77    0.73
  -5   2  -1    6.98    0.51
   5  -2   1    6.98    0.69
   5  -2   1    7.27    0.59
  -6   2  -1    9.67    0.97
  -6   2  -1    9.78    0.64
  -6   2  -1    9.58    0.72
   6  -2   1   10.73    0.80
   6  -2   1    9.06    0.84
  -7   2  -1    8.24    1.12
  -7   2  -1   10.70    0.85
  -7   2  -1    8.99    0.77
   7  -2   1   12.28    1.05
   7  -2   1    9.20    1.06
  -8   2  -1    4.88    1.37
  -8   2  -1    5.36    0.73
  -8   2  -1    6.08    0.79
   8  -2   1    5.49    0.95
   8  -2   1    6.32    1.08
  -9   2  -1    6.11    1.35
  -9   2  -1    5.43    0.93
  -9   2  -1    5.29    0.79
   9  -2   1    5.13    1.31
   9  -2   1    5.53    1.27
   9  -2   1    7.73    1.19
 -10   2  -1    0.09    0.81
 -10   2  -1   -3.25    1.26
 -10   2  -1   -1.27    0.91
  10  -2   1   -2.00    1.04
  10  -2   1    0.82    1.32
  10  -2   1   -1.04    1.32
 -11   2  -1    6.49    2.19
 -11   2  -1    7.39    1.17
 -11   2  -1    6.10    1.26
  11  -2   1    6.17    1.68
  11  -2   1    7.79    1.92
  11  -2   1    7.95    1.99
  11   1  -1    3.15    1.94
 -11  -1   1    7.13    1.92
 -11  -1   1    5.31    1.94
 -11  -1   1    5.42    2.27
  10   1  -1    0.83    1.51
  10   1  -1    0.29    1.25
  10   1  -1    0.45    1.12
 -10  -1   1    2.62    1.37
 -10  -1   1    0.90    1.42
 -10  -1   1    1.38    1.37
   9   1  -1   37.46    2.29
   9   1  -1   34.85    2.44
   9   1  -1   34.66    2.43
  -9  -1   1   36.81    2.51
  -9  -1   1   33.44    2.23
  -9  -1   1   36.72    2.18
   8   1  -1    1.33    0.93
   8   1  -1    1.85    0.76
   8   1  -1    4.19    1.05
  -8  -1   1    2.71    1.02
  -8  -1   1    1.23    1.53
  -8  -1   1    2.41    0.81
   7   1  -1   44.77    2.02
   7   1  -1   45.93    2.45
  -7  -1   1   46.71    2.05
  -7  -1   1   46.04    1.98
   6   1  -1    1.58    0.49
   6   1  -1    0.92    0.58
   6   1  -1    1.69    0.53
  -6  -1   1    0.59    0.56
  -6  -1   1    1.15    0.54
   5   1  -1   16.25    1.00
   5   1  -1   17.35    1.09
  -5  -1   1   15.56    0.99
  -5  -1   1   17.50    1.02
   4   1  -1   46.52    2.41
   4   1  -1   48.68    1.64
  -4  -1   1   51.96    1.66
  -4  -1   1   52.74    1.70
   3   1  -1   54.59    1.59
   3   1  -1   54.03    1.62
  -3  -1   1   52.12    1.55
  -3  -1   1   54.69    1.61
   2   1  -1    0.96    0.22
   2   1  -1    0.40    0.25
  -2  -1   1    0.81    0.28
  -2  -1   1    1.14    0.26
   1   1  -1    6.33    0.34
   1   1  -1    6.60    0.37
   1   1  -1    7.14    0.37
  -1  -1   1    6.47    0.37
  -1  -1   1    6.73    0.37
   0   1  -1    0.00    0.03
  -1   1  -1  111.20    2.29
   1  -1   1  110.58    2.29
  -2   1  -1   75.55    1.59
  -2   1  -1   76.46    1.60
  -2   1  -1   79.60    1.86
   2  -1   1   77.35    1.65
   2  -1   1   74.46    1.66
   2  -1   1   72.59    1.83
  -3   1  -1    6.46    0.54
  -3   1  -1    5.81    0.38
  -3   1  -1    5.91    0.37
   3  -1   1    5.70    0.39
   3  -1   1    5.94    0.46
  -4   1  -1    6.02    0.46
  -4   1  -1    5.99    0.55
  -4   1  -1    6.48    0.49
   4  -1   1    6.28    0.56
   4  -1   1    5.90    0.49
  -5   1  -1   51.69    1.57
  -5   1  -1   53.64    1.59
  -5   1  -1   54.32    1.92
   5  -1   1   46.74    1.62
   5  -1   1   49.87    2.37
  -6   1  -1   10.45    0.90
  -6   1  -1    7.68    0.66
  -6   1  -1    8.12    0.78
   6  -1   1    9.07    0.81
   6  -1   1    7.42    0.85
  -7   1  -1   44.13    2.04
  -7   1  -1   46.69    1.73
  -7   1  -1   48.77    1.75
   7  -1   1   44.35    1.86
   7  -1   1   44.55    1.96
  -8   1  -1    0.11    0.59
  -8   1  -1   -0.29    0.52
  -8   1  -1    0.45    0.84
   8  -1   1    1.02    0.78
   8  -1   1    0.10    0.70
  -9   1  -1   22.93    2.06
  -9   1  -1   25.23    1.69
  -9   1  -1   23.39    1.51
   9  -1   1   24.35    1.76
   9  -1   1   21.98    2.04
   9  -1   1   26.74    1.87
 -10   1  -1    4.38    1.03
 -10   1  -1    5.59    1.68
 -10   1  -1    6.21    1.24
  10  -1   1    5.95    1.51
  10  -1   1    1.66    1.27
  10  -1   1    5.02    1.35
 -11   1  -1   11.56    2.40
 -11   1  -1    7.18    2.24
  11  -1   1    7.96    1.86
  11  -1   1   10.06    3.24
  11  -1   1    8.03    2.04
  11   0  -1   -1.06    1.57
 -11   0   1    1.88    1.79
 -11   0   1   -0.41    2.19
 -11   0   1    1.19    1.48
  10   0  -1    4.56    1.28
  10   0  -1    6.28    1.64
  10   0  -1    6.00    1.59
 -10   0   1    5.83    1.22
 -10   0   1    3.73    1.60
 -10   0   1    6.23    1.49
   9   0  -1    4.21    1.21
   9   0  -1    2.56    1.24
   9   0  -1    4.01    1.05
  -9   0   1    4.05    0.96
  -9   0   1    4.06    1.20
  -9   0   1    4.87    1.07
   8   0  -1    4.48    1.08
   8   0  -1    2.91    1.03
   8   0  -1    4.41    1.08
  -8   0   1    3.18    1.03
  -8   0   1    5.87    0.89
  -8   0   1    4.39    0.94
   7   0  -1    0.43    0.51
   7   0  -1    0.33    0.63
   7   0  -1    1.42    0.59
  -7   0   1    1.49    0.82
  -7   0   1   -0.28    0.58
  -7   0   1   -0.52    0.51
   6   0  -1   16.43    1.16
   6   0  -1   14.31    1.02
  -6   0   1   15.13    1.01
  -6   0   1   15.79    1.01
   5   0  -1   16.92    1.05
   5   0  -1   20.01    1.05
  -5   0   1   19.58    1.04
  -5   0   1   18.95    1.01
   4   0  -1   46.28    1.59
   4   0  -1   49.88    1.58
  -4   0   1   48.36    1.54
  -4   0   1   50.75    1.57
   3   0  -1   16.17    0.79
   3   0  -1   17.20    0.75
  -3   0   1   16.65    0.77
  -3   0   1   16.97    0.74
   2   0  -1   23.09    0.80
   2   0  -1   23.06    0.77
  -2   0   1   21.32    0.76
  -2   0   1   22.80    0.77
   1   0  -1    2.76    0.23
   1   0  -1    2.41    0.19
   1   0  -1    2.40    0.23
  -1   0   1    2.33    0.19
  -1   0   1    2.67    0.18
  -1   0   1    2.19    0.21
  -1   0  -1    1.62    0.17
  -1   0  -1    1.91    0.15
  -1   0  -1    1.54    0.17
   1   0   1    1.97    0.23
   1   0   1    1.91    0.17
   1   0   1    1.66    0.19
  -2   0  -1    3.80    0.38
  -2   0  -1    4.06    0.36
  -2   0  -1    4.11    0.32
   2   0   1    3.67    0.36
   2   0   1    4.50    0.34
  -3   0  -1   25.54    0.90
  -3   0  -1   23.55    0.99
  -3   0  -1   24.11    0.89
   3   0   1   25.38    0.95
   3   0   1   25.38    0.92
  -4   0  -1   29.11    1.09
  -4   0  -1   30.50    1.25
  -4   0  -1   29.23    1.10
   4   0   1   30.68    1.20
   4   0   1   29.47    1.14
  -5   0  -1   19.21    1.15
  -5   0  -1   18.35    0.94
  -5   0  -1   18.86    0.96
   5   0   1   18.48    1.05
   5   0   1   18.06    0.99
  -6   0  -1   18.30    1.19
  -6   0  -1   19.36    1.11
  -6   0  -1   16.76    1.04
   6   0   1   19.17    1.14
   6   0   1   16.64    1.17
  -7   0  -1    1.23    0.72
  -7   0  -1    1.28    0.58
  -7   0  -1    0.53    0.53
   7   0   1    1.53    0.69
   7   0   1    1.69    0.60
  -8   0  -1    0.86    0.70
  -8   0  -1   -0.19    0.76
  -8   0  -1    2.46    0.82
   8   0   1    1.51    0.88
   8   0   1    1.14    0.74
  -9   0  -1    3.22    0.92
  -9   0  -1    2.37    0.99
  -9   0  -1    3.92    1.22
   9   0   1    5.80    1.13
   9   0   1    5.34    1.25
   9   0   1    1.17    1.10
 -10   0  -1    9.24    1.79
 -10   0  -1   13.56    1.70
 -10   0  -1    9.55    1.48
  10   0   1    9.44    1.70
  10   0   1    8.84    1.76
  10   0   1   11.67    1.70
 -11   0  -1   -1.84    1.59
 -11   0  -1    0.39    2.03
 -11   0  -1   -1.19    1.41
  11   0   1   -1.59    3.21
  11   0   1    5.64    1.67
  11  -1  -1    4.39    1.51
  11  -1  -1    5.17    1.92
  11  -1  -1    4.80    1.95
 -11   1   1    3.94    1.59
 -11   1   1    1.12    2.05
 -11   1   1    4.10    1.42
  10  -1  -1    3.54    1.37
  10  -1  -1    0.42    1.31
  10  -1  -1    2.30    1.18
 -10   1   1    1.44    1.29
 -10   1   1    2.05    1.28
   9  -1  -1   55.85    2.74
   9  -1  -1   60.27    2.63
   9  -1  -1   56.72    2.83
  -9   1   1   59.32    2.41
  -9   1   1   59.19    2.48
  -9   1   1   59.67    2.91
   8  -1  -1    0.94    0.82
   8  -1  -1   -0.03    0.70
   8  -1  -1   -1.73    0.69
  -8   1   1    0.05    0.81
  -8   1   1   -0.29    0.66
  -8   1   1   -0.83    0.55
   7  -1  -1   44.68    2.03
   7  -1  -1   46.34    2.01
   7  -1  -1   41.87    1.86
  -7   1   1   44.25    1.77
  -7   1   1   43.17    1.77
  -7   1   1   45.05    2.11
   6  -1  -1    5.35    0.73
   6  -1  -1    4.08    0.68
   6  -1  -1    5.81    0.81
  -6   1   1    4.73    0.65
  -6   1   1    5.62    0.87
  -6   1   1    5.61    0.70
   5  -1  -1   64.69    2.04
   5  -1  -1   64.95    1.99
  -5   1   1   62.41    1.88
  -5   1   1   65.15    1.93
   4  -1  -1   35.69    1.23
   4  -1  -1   32.57    1.25
  -4   1   1   35.19    1.18
  -4   1   1   33.44    1.16
   3  -1  -1    0.15    0.24
   3  -1  -1    0.10    0.18
  -3   1   1   -0.03    0.20
  -3   1   1    0.06    0.17
   2  -1  -1   27.13    0.87
   2  -1  -1   28.45    0.84
   2  -1  -1   27.42    0.85
  -2   1   1   26.89    0.82
  -2   1   1   27.70    0.82
   1  -1  -1   28.59    0.69
   1  -1  -1   28.27    0.75
   1  -1  -1   26.42    0.74
  -1   1   1   27.70    0.74
  -1   1   1   26.95    0.67
  -1   1   1   27.78    0.73
   0  -1  -1  140.32    2.78
   0  -1  -1  135.96    2.76
   0   1   1  135.77    2.77
   0   1   1  140.81    2.77
  -1  -1  -1   14.80    0.56
  -1  -1  -1   13.31    0.52
   1   1   1   14.59    0.57
   1   1   1   14.16    0.53
  -2  -1  -1   12.31    0.62
  -2  -1  -1   12.70    0.61
   2   1   1   14.64    0.64
   2   1   1   12.28    0.65
  -3  -1  -1   12.55    0.68
  -3  -1  -1   12.17    0.69
   3   1   1   11.66    0.71
   3   1   1   11.53    0.67
  -4  -1  -1   30.34    1.22
  -4  -1  -1   31.02    1.23
   4   1   1   32.33    1.96
   4   1   1   30.27    1.25
  -5  -1  -1   41.12    1.67
  -5  -1  -1   37.85    1.52
  -5  -1  -1   39.53    1.54
   5   1   1   41.60    1.60
   5   1   1   40.28    1.64
  -6  -1  -1    4.93    0.76
  -6  -1  -1    5.48    0.76
  -6  -1  -1    4.53    0.83
   6   1   1    4.59    0.73
   6   1   1    4.21    0.80
  -7  -1  -1   42.60    2.16
  -7  -1  -1   47.47    1.99
  -7  -1  -1   43.12    1.89
   7   1   1   46.17    2.17
   7   1   1   48.34    2.07
  -8  -1  -1    0.19    0.90
  -8  -1  -1   -0.25    0.72
  -8  -1  -1   -1.08    0.79
   8   1   1    0.71    0.92
   8   1   1   -1.37    0.73
  -9  -1  -1   49.69    2.86
  -9  -1  -1   51.75    2.49
  -9  -1  -1   48.84    2.50
   9   1   1   47.08    2.74
   9   1   1   56.94    2.70
   9   1   1   47.85    2.77
 -10  -1  -1    2.24    1.54
 -10  -1  -1   -0.26    1.33
 -10  -1  -1    0.05    1.21
  10   1   1   -1.40    1.21
  10   1   1    0.37    1.46
  10   1   1    0.44    1.44
 -11  -1  -1   13.57    2.22
 -11  -1  -1   11.33    1.90
 -11  -1  -1   12.28    2.68
  11   1   1   11.03    2.22
  11  -2  -1   10.90    1.92
  11  -2  -1    5.90    1.86
  11  -2  -1   13.34    1.96
 -11   2   1    9.31    2.21
 -11   2   1    9.70    1.57
  10  -2  -1    4.25    1.45
  10  -2  -1    0.76    1.40
  10  -2  -1    1.80    1.24
 -10   2   1    1.13    0.88
 -10   2   1   -0.03    1.10
 -10   2   1    1.53    1.41
   9  -2  -1   13.56    1.63
   9  -2  -1   15.99    1.79
   9  -2  -1   13.65    1.51
  -9   2   1   12.25    1.38
  -9   2   1   14.22    1.82
  -9   2   1   10.35    1.19
   8  -2  -1   13.88    1.43
   8  -2  -1   12.78    1.31
   8  -2  -1   11.90    1.36
  -8   2   1   12.75    1.19
  -8   2   1   10.28    1.03
   7  -2  -1    9.00    1.00
   7  -2  -1    7.95    1.00
   7  -2  -1    6.81    0.94
  -7   2   1    7.82    0.82
  -7   2   1    8.48    0.89
  -7   2   1    8.77    1.11
   6  -2  -1   11.12    0.99
   6  -2  -1   11.62    0.99
   6  -2  -1   11.49    0.88
  -6   2   1   12.81    1.07
  -6   2   1   10.72    0.82
  -6   2   1   11.57    0.78
   5  -2  -1   38.18    1.42
   5  -2  -1   37.97    1.48
   5  -2  -1   40.07    1.51
  -5   2   1   39.33    1.33
  -5   2   1   39.32    1.58
  -5   2   1   37.50    1.32
   4  -2  -1   74.91    2.05
   4  -2  -1   72.91    1.99
  -4   2   1   74.46    1.92
  -4   2   1   76.84    2.16
  -4   2   1   71.99    1.89
   3  -2  -1    5.45    0.48
   3  -2  -1    5.48    0.48
   3  -2  -1    5.10    0.43
  -3   2   1    5.88    0.40
  -3   2   1    6.06    0.50
  -3   2   1    5.81    0.42
   2  -2  -1   18.65    0.70
   2  -2  -1   17.78    0.61
   2  -2  -1   18.42    0.68
  -2   2   1   18.28    0.65
  -2   2   1   18.31    0.66
  -2   2   1   18.22    0.64
   1  -2  -1    1.06    0.23
   1  -2  -1    1.21    0.13
   1  -2  -1    1.22    0.22
  -1   2   1    1.23    0.22
  -1   2   1    1.20    0.14
  -1   2   1    1.22    0.21
   0  -2  -1    1.30    0.25
   0  -2  -1    1.65    0.27
   0   2   1    1.88    0.29
   0   2   1    1.66    0.26
  -1  -2  -1   37.14    1.14
  -1  -2  -1   35.89    1.11
   1   2   1   36.68    1.09
   1   2   1   35.31    1.12
  -2  -2  -1   10.44    0.65
  -2  -2  -1   11.36    0.66
   2   2   1   10.15    0.61
   2   2   1    9.19    0.64
  -3  -2  -1   48.95    1.60
  -3  -2  -1   48.62    1.55
   3   2   1   47.21    1.55
   3   2   1   46.95    1.60
  -4  -2  -1   11.70    0.82
  -4  -2  -1   11.99    0.86
   4   2   1   11.85    0.85
   4   2   1   12.49    0.90
  -5  -2  -1   44.94    1.82
  -5  -2  -1   39.40    1.65
  -5  -2  -1   40.61    1.68
   5   2   1   41.62    1.76
   5   2   1   42.85    1.68
  -6  -2  -1    0.26    0.54
  -6  -2  -1    0.51    0.65
  -6  -2  -1    0.11    0.56
   6   2   1    0.16    0.62
   6   2   1    0.66    0.55
  -7  -2  -1    1.78    0.85
  -7  -2  -1    0.61    0.68
  -7  -2  -1    1.63    0.77
   7   2   1   -0.79    0.59
   7   2   1    0.38    0.75
  -8  -2  -1    1.81    0.91
  -8  -2  -1    1.36    1.01
  -8  -2  -1    0.82    0.97
   8   2   1   -0.13    0.96
   8   2   1    0.88    0.88
  -9  -2  -1    1.80    1.07
  -9  -2  -1   -1.65    1.15
  -9  -2  -1   -0.27    1.10
   9   2   1   -2.28    1.21
   9   2   1    1.49    1.05
   9   2   1    2.15    1.30
 -10  -2  -1    9.50    1.75
 -10  -2  -1    4.32    1.55
 -10  -2  -1    8.11    1.76
  10   2   1    8.04    1.82
  10   2   1    7.91    1.86
  10   2   1    9.31    1.80
 -11  -2  -1    5.76    2.05
 -11  -2  -1    4.30    1.97
  11  -3  -1    6.88    1.91
  11  -3  -1    5.25    1.89
  11  -3  -1    7.78    1.77
 -11   3   1    5.53    1.06
 -11   3   1    3.80    1.15
 -11   3   1   10.70    2.38
  10  -3  -1   -0.59    1.29
  10  -3  -1   -0.03    1.06
  10  -3  -1    1.01    1.39
 -10   3   1   -0.85    0.92
 -10   3   1   -1.29    1.36
 -10   3   1    1.65    0.78
   9  -3  -1   22.59    1.96
   9  -3  -1   28.28    2.16
   9  -3  -1   25.42    1.88
  -9   3   1   22.29    2.10
  -9   3   1   22.32    1.55
  -9   3   1   24.81    1.36
   8  -3  -1    0.48    0.63
  -8   3   1    0.33    0.48
  -8   3   1    0.39    0.80
  -8   3   1   -0.42    0.58
   7  -3  -1   37.15    1.75
   7  -3  -1   36.35    1.64
   7  -3  -1   38.34    1.77
  -7   3   1   36.76    1.86
  -7   3   1   38.04    1.41
  -7   3   1   37.12    1.47
   6  -3  -1    4.58    0.71
   6  -3  -1    5.64    0.74
   6  -3  -1    5.31    0.76
  -6   3   1    5.39    0.80
  -6   3   1    4.55    0.56
  -6   3   1    5.44    0.65
   5  -3  -1   38.35    1.61
   5  -3  -1   37.45    1.47
   5  -3  -1   35.69    1.36
  -5   3   1   35.41    1.22
  -5   3   1   36.41    1.20
  -5   3   1   34.70    1.46
   4  -3  -1   32.50    1.17
   4  -3  -1   31.32    1.20
   4  -3  -1   34.68    1.19
  -4   3   1   32.82    1.05
  -4   3   1   32.29    1.07
  -4   3   1   34.28    1.28
   3  -3  -1    0.15    0.21
   3  -3  -1    0.04    0.18
   3  -3  -1    0.35    0.23
  -3   3   1    0.00    0.15
  -3   3   1    0.42    0.20
  -3   3   1    0.27    0.21
   2  -3  -1   96.73    2.31
   2  -3  -1   98.74    2.30
   2  -3  -1   97.36    2.04
  -2   3   1   98.22    2.21
  -2   3   1   99.59    2.15
  -2   3   1   99.73    2.20
   1  -3  -1    5.58    0.45
   1  -3  -1    5.23    0.47
  -1   3   1    6.20    0.46
  -1   3   1    5.79    0.39
   0  -3  -1  223.37    4.63
   0  -3  -1  220.07    4.65
   0   3   1  221.45    4.59
   0   3   1  222.26    4.60
  -1  -3  -1    2.52    0.39
  -1  -3  -1    2.36    0.39
   1   3   1    2.50    0.41
   1   3   1    2.28    0.35
  -2  -3  -1   26.09    1.10
  -2  -3  -1   27.59    1.13
   2   3   1   26.36    1.13
   2   3   1   29.18    1.12
  -3  -3  -1    4.19    0.59
  -3  -3  -1    3.82    0.58
   3   3   1    3.82    0.60
   3   3   1    4.05    0.59
  -4  -3  -1   10.25    0.89
  -4  -3  -1   10.93    0.89
   4   3   1   10.92    0.86
   4   3   1   10.43    0.87
  -5  -3  -1   39.78    1.81
  -5  -3  -1   41.90    1.80
   5   3   1   44.46    1.83
   5   3   1   42.95    1.88
  -6  -3  -1    1.66    0.71
  -6  -3  -1    1.71    0.74
  -6  -3  -1    2.86    0.73
   6   3   1    2.59    0.70
  -7  -3  -1   24.99    1.75
  -7  -3  -1   28.17    1.97
   7   3   1   29.28    1.82
   7   3   1   25.62    1.86
  -8  -3  -1    0.43    0.98
  -8  -3  -1    0.86    0.98
  -8  -3  -1    3.52    1.11
   8   3   1    0.26    0.96
   8   3   1    2.66    1.18
   8   3   1    0.54    1.08
  -9  -3  -1   20.04    2.29
  -9  -3  -1   23.00    2.25
  -9  -3  -1   20.29    2.31
   9   3   1   18.87    2.30
   9   3   1   17.79    2.15
   9   3   1   20.78    2.20
 -10  -3  -1    0.54    1.65
 -10  -3  -1    3.80    1.71
 -10  -3  -1    1.12    1.59
  10   3   1    2.45    1.65
  11  -4  -1   10.23    2.09
  11  -4  -1    8.81    2.07
  11  -4  -1   11.59    1.99
 -11   4   1   12.12    2.32
  10  -4  -1   -1.22    1.41
  10  -4  -1    4.19    1.49
  10  -4  -1    1.40    1.28
 -10   4   1    1.21    0.86
 -10   4   1    1.23    1.48
 -10   4   1   -0.04    0.64
   9  -4  -1   15.09    1.50
   9  -4  -1   13.86    1.68
   9  -4  -1   13.63    1.71
  -9   4   1   14.68    1.16
  -9   4   1   13.27    1.72
  -9   4   1   15.32    1.00
   8  -4  -1    1.66    0.73
   8  -4  -1    2.43    0.89
  -8   4   1    1.21    0.92
  -8   4   1    1.23    0.43
  -8   4   1    1.66    0.56
   7  -4  -1   -0.20    0.53
   7  -4  -1    1.19    0.62
   7  -4  -1    0.73    0.68
  -7   4   1    0.53    0.41
  -7   4   1    0.71    0.65
  -7   4   1    0.38    0.32
   6  -4  -1   10.93    0.96
   6  -4  -1   10.75    0.96
   6  -4  -1    9.27    0.86
  -6   4   1    9.95    1.00
  -6   4   1   10.63    0.72
  -6   4   1   10.76    0.63
   5  -4  -1   -0.26    0.34
   5  -4  -1   -0.20    0.31
   5  -4  -1    0.25    0.35
  -5   4   1   -0.20    0.34
  -5   4   1    0.12    0.28
  -5   4   1    0.25    0.22
   4  -4  -1   15.84    0.89
   4  -4  -1   16.15    0.77
   4  -4  -1   16.99    0.88
  -4   4   1   16.86    0.67
  -4   4   1   15.92    0.72
  -4   4   1   15.36    0.83
   3  -4  -1    2.79    0.40
   3  -4  -1    3.30    0.47
   3  -4  -1    3.80    0.35
  -3   4   1    4.32    0.37
  -3   4   1    3.35    0.33
  -3   4   1    3.93    0.39
   2  -4  -1   40.43    1.29
   2  -4  -1   39.88    1.31
   2  -4  -1   39.31    0.82
  -2   4   1   38.49    1.16
  -2   4   1   39.94    1.15
   1  -4  -1   11.11    0.66
   1  -4  -1   11.07    0.67
  -1   4   1   11.41    0.64
  -1   4   1   11.42    0.59
   0  -4  -1   13.36    0.76
   0  -4  -1   13.77    0.78
   0   4   1   13.04    0.75
   0   4   1   14.15    0.72
  -1  -4  -1   13.69    0.82
  -1  -4  -1   12.91    0.84
   1   4   1   12.95    0.75
   1   4   1   13.46    0.82
  -2  -4  -1   17.24    1.00
  -2  -4  -1   15.32    0.96
   2   4   1   16.31    0.91
   2   4   1   17.84    1.00
  -3  -4  -1   61.47    2.11
  -3  -4  -1   57.31    2.01
   3   4   1   56.79    2.02
   3   4   1   59.99    2.01
  -4  -4  -1    1.16    0.61
  -4  -4  -1    1.94    0.58
   4   4   1    1.17    0.47
   4   4   1    1.57    0.66
  -5  -4  -1   38.04    1.76
  -5  -4  -1   36.18    1.83
   5   4   1   36.96    1.87
   5   4   1   38.17    1.80
  -6  -4  -1    1.71    0.83
  -6  -4  -1    1.94    0.79
  -6  -4  -1    1.07    0.71
   6   4   1    2.49    0.89
  -7  -4  -1    3.66    1.04
  -7  -4  -1    4.10    1.10
  -7  -4  -1    4.20    1.11
   7   4   1    2.48    0.85
   7   4   1    3.03    1.08
   7   4   1    3.88    1.13
  -8  -4  -1    3.43    1.28
  -8  -4  -1    4.67    1.31
  -8  -4  -1    3.93    1.36
   8   4   1    4.38    1.29
   8   4   1    3.18    1.35
   8   4   1    3.96    1.11
  -9  -4  -1   -1.74    1.41
  -9  -4  -1    0.24    1.56
  -9  -4  -1    1.68    1.53
   9   4   1   -0.71    1.50
   9   4   1    1.40    1.42
   9   4   1   -1.12    1.40
 -10  -4  -1   -2.79    1.90
 -10  -4  -1   -1.20    2.09
 -10  -4  -1    0.84    2.01
  10   4   1    7.64    3.26
  11  -5  -1   14.47    2.18
  11  -5  -1   12.71    2.22
  11  -5  -1   14.39    2.07
 -11   5   1   15.03    2.51
  10  -5  -1    0.68    1.37
  10  -5  -1    0.51    1.28
  10  -5  -1    1.62    1.51
 -10   5   1   -2.64    1.41
   9  -5  -1   35.53    2.08
   9  -5  -1   33.56    2.25
   9  -5  -1   34.30    2.38
  -9   5   1   34.88    2.42
   8  -5  -1    2.58    0.90
   8  -5  -1    3.14    0.81
   8  -5  -1    3.08    0.94
  -8   5   1    1.76    0.89
  -8   5   1    2.49    0.31
  -8   5   1    1.21    0.33
   7  -5  -1   31.47    1.58
   7  -5  -1   29.76    1.76
   7  -5  -1   30.29    1.59
  -7   5   1   31.77    0.95
  -7   5   1   31.25    0.99
  -7   5   1   31.91    1.71
   6  -5  -1    1.90    0.55
   6  -5  -1    1.53    0.54
   6  -5  -1    2.07    0.64
  -6   5   1    2.09    0.56
  -6   5   1    1.41    0.27
  -6   5   1    2.10    0.33
   5  -5  -1    3.57    0.54
   5  -5  -1    3.56    0.53
   5  -5  -1    3.01    0.63
  -5   5   1    3.07    0.35
  -5   5   1    3.15    0.52
  -5   5   1    2.95    0.36
   4  -5  -1   49.31    1.65
   4  -5  -1   46.20    1.65
   4  -5  -1   46.49    1.33
  -4   5   1   46.60    1.27
  -4   5   1   46.73    1.26
  -4   5   1   46.13    1.46
   3  -5  -1    3.27    0.25
   3  -5  -1    3.52    0.48
   3  -5  -1    3.08    0.51
  -3   5   1    2.84    0.35
  -3   5   1    2.82    0.33
  -3   5   1    3.85    0.42
   2  -5  -1  113.40    2.90
   2  -5  -1  115.53    2.92
  -2   5   1  116.63    2.66
  -2   5   1  117.40    2.69
   1  -5  -1   17.89    0.92
   1  -5  -1   18.91    0.97
  -1   5   1   17.66    0.80
  -1   5   1   17.41    0.86
   0  -5  -1  102.47    2.73
   0  -5  -1   98.71    2.74
   0   5   1  103.01    2.61
   0   5   1  104.28    2.15
   0   5   1  103.91    2.65
  -1  -5  -1   14.97    0.97
  -1  -5  -1   12.46    0.89
   1   5   1   13.49    0.66
   1   5   1   12.36    0.88
  -2  -5  -1    9.17    0.88
  -2  -5  -1    8.68    0.86
   2   5   1    9.54    0.81
   2   5   1    8.19    0.90
  -3  -5  -1    9.92    1.02
  -3  -5  -1    7.13    0.89
   3   5   1   10.36    1.00
   3   5   1    9.67    0.89
  -4  -5  -1    9.76    1.14
  -4  -5  -1    7.52    1.00
   4   5   1    7.39    1.00
   4   5   1    6.65    0.93
  -5  -5  -1   43.14    2.15
  -5  -5  -1   47.74    2.08
  -5  -5  -1   44.51    2.11
   5   5   1   45.01    2.10
   5   5   1   45.74    2.20
   5   5   1   46.40    2.06
  -6  -5  -1    2.90    0.96
  -6  -5  -1    3.12    1.05
  -6  -5  -1    2.60    0.92
   6   5   1    1.52    0.80
   6   5   1    0.94    0.89
   6   5   1    1.82    1.01
  -7  -5  -1   36.04    2.43
  -7  -5  -1   28.81    2.17
  -7  -5  -1   34.04    2.16
   7   5   1   33.60    2.21
   7   5   1   32.74    2.18
   7   5   1   31.75    2.33
  -8  -5  -1    0.74    1.32
  -8  -5  -1   -1.99    1.38
  -8  -5  -1    1.49    1.39
   8   5   1   -2.29    1.19
   8   5   1    2.89    1.55
   8   5   1   -0.52    1.34
  -9  -5  -1    6.40    1.81
  -9  -5  -1    3.40    1.97
  -9  -5  -1    3.88    1.82
   9   5   1    0.70    1.92
   9   5   1    5.62    2.03
  10  -6  -1   -0.13    1.53
  10  -6  -1    1.58    1.30
  10  -6  -1    2.18    1.37
 -10   6   1    4.90    1.64
   9  -6  -1    5.18    1.34
   9  -6  -1    5.39    1.22
   9  -6  -1    5.63    1.16
  -9   6   1    1.08    1.20
   8  -6  -1   25.00    1.68
   8  -6  -1   24.08    1.69
   8  -6  -1   29.02    1.90
  -8   6   1   24.22    1.89
   7  -6  -1    2.07    0.72
   7  -6  -1    2.10    0.79
   7  -6  -1    1.16    0.62
  -7   6   1    1.57    0.68
   6  -6  -1   16.75    1.01
   6  -6  -1   14.75    1.29
   6  -6  -1   18.76    1.23
  -6   6   1   15.66    1.08
   5  -6  -1    0.79    0.53
   5  -6  -1    0.52    0.35
   5  -6  -1   -0.07    0.40
  -5   6   1    0.61    0.36
   4  -6  -1   59.40    2.02
   4  -6  -1   58.13    1.36
   4  -6  -1   57.99    1.95
  -4   6   1   54.98    1.40
  -4   6   1   57.55    1.65
  -4   6   1   57.37    1.39
   3  -6  -1    0.78    0.46
   3  -6  -1    0.99    0.36
  -3   6   1    0.87    0.24
  -3   6   1    0.89    0.30
   2  -6  -1   41.75    1.57
  -2   6   1   42.42    1.31
  -2   6   1   40.17    1.33
   1  -6  -1   37.02    1.54
   1  -6  -1   33.79    1.44
  -1   6   1   37.74    1.29
  -1   6   1   34.35    1.31
   0  -6  -1    3.48    0.62
   0  -6  -1    3.76    0.65
   0   6   1    3.22    0.30
   0   6   1    3.61    0.88
   0   6   1    3.57    0.52
  -1  -6  -1   12.35    1.05
  -1  -6  -1   12.20    1.03
   1   6   1   13.38    0.72
   1   6   1   12.60    0.95
   1   6   1   12.52    1.01
  -2  -6  -1    1.97    0.62
  -2  -6  -1    1.29    0.58
   2   6   1    1.41    0.45
   2   6   1    0.41    0.44
   2   6   1    1.40    0.56
  -3  -6  -1   50.80    2.13
  -3  -6  -1   49.80    2.16
   3   6   1   46.77    2.05
   3   6   1   48.86    2.03
   3   6   1   49.20    1.82
  -4  -6  -1   -0.73    0.77
  -4  -6  -1   -0.70    0.68
  -4  -6  -1   -0.73    0.51
   4   6   1    0.17    0.56
   4   6   1    0.17    0.60
  -5  -6  -1   18.01    1.70
  -5  -6  -1   18.48    1.71
  -5  -6  -1   19.56    1.49
   5   6   1   16.20    1.53
   5   6   1   19.01    1.63
   5   6   1   21.06    1.74
  -6  -6  -1   -0.11    0.96
  -6  -6  -1    2.19    0.96
  -6  -6  -1    1.02    1.08
   6   6   1    0.81    0.97
   6   6   1    1.68    1.07
   6   6   1   -2.12    0.90
  -7  -6  -1    0.48    1.34
  -7  -6  -1    2.11    1.34
  -7  -6  -1    0.54    1.10
   7   6   1   -0.44    1.21
   7   6   1    0.99    1.35
   7   6   1   -0.26    1.21
  -8  -6  -1    1.87    1.74
  -8  -6  -1    4.64    1.68
  -8  -6  -1    4.17    1.62
   8   6   1   -1.53    1.57
   8   6   1    1.71    1.58
   8   6   1   -1.75    1.62
  -9  -6  -1    3.74    4.15
  -9  -6  -1    0.21    2.01
  10  -7  -1   -2.03    1.77
  10  -7  -1   -0.25    1.32
  10  -7  -1   -0.12    1.36
 -10   7   1   -3.21    1.58
   9  -7  -1   16.49    1.72
   9  -7  -1   15.75    1.87
   9  -7  -1   18.26    1.94
  -9   7   1   15.72    2.02
   8  -7  -1    0.45    0.78
   8  -7  -1    0.91    1.00
  -8   7   1    0.96    0.93
   7  -7  -1   20.99    1.29
   7  -7  -1   24.07    1.60
  -7   7   1   23.36    1.44
   6  -7  -1    3.80    0.55
   6  -7  -1    3.22    0.87
   6  -7  -1    4.34    0.77
  -6   7   1    2.49    0.59
   5  -7  -1    8.59    0.49
   5  -7  -1    8.57    1.07
   5  -7  -1    8.62    0.98
   4  -7  -1   63.75    2.31
   4  -7  -1   71.83    2.35
   3  -7  -1    7.58    0.79
   3  -7  -1    6.82    0.87
  -3   7   1    6.56    0.55
  -3   7   1    6.96    0.51
   2  -7  -1    6.80    0.81
   2  -7  -1    6.69    0.86
  -2   7   1    6.03    0.68
  -2   7   1    6.96    0.60
   1  -7  -1    0.38    0.47
   1  -7  -1    0.41    0.52
  -1   7   1    0.38    0.38
  -1   7   1    0.28    0.42
   0  -7  -1   28.20    1.53
   0  -7  -1   26.70    1.50
   0   7   1   27.11    0.66
   0   7   1   30.81    1.43
   0   7   1   27.40    0.67
   0   7   1   30.43    1.34
  -1  -7  -1    0.82    0.26
  -1  -7  -1   -0.38    0.55
  -1  -7  -1    0.85    0.65
   1   7   1    0.59    0.59
   1   7   1   -0.02    0.34
   1   7   1    1.28    0.52
  -2  -7  -1   16.86    0.86
  -2  -7  -1   13.56    1.68
  -2  -7  -1   15.83    1.38
   2   7   1   15.32    0.99
   2   7   1   16.27    1.31
  -3  -7  -1   -0.07    0.50
  -3  -7  -1    0.95    0.76
   3   7   1    1.52    0.63
   3   7   1    2.16    0.73
   3   7   1    1.60    0.88
  -4  -7  -1    0.63    0.84
  -4  -7  -1   -0.68    0.73
  -4  -7  -1   -0.41    0.60
   4   7   1    0.46    0.91
   4   7   1   -0.20    0.78
   4   7   1   -0.53    0.71
  -5  -7  -1   10.71    1.54
  -5  -7  -1   12.53    1.59
  -5  -7  -1   10.64    1.24
   5   7   1   12.31    1.61
   5   7   1   11.61    1.45
   5   7   1    9.67    1.44
  -6  -7  -1    6.87    1.59
  -6  -7  -1    4.12    1.91
  -6  -7  -1    5.41    1.47
   6   7   1    5.99    1.45
   6   7   1    6.35    1.57
   6   7   1    3.37    1.30
  -7  -7  -1    9.12    1.67
  -7  -7  -1    4.75    1.68
  -7  -7  -1    9.90    1.90
   7   7   1   11.17    1.83
   7   7   1    8.93    1.75
   7   7   1    7.16    1.76
  -8  -7  -1   -1.13    2.44
  -8  -7  -1    1.61    2.01
   8   7   1    5.71    2.30
   8   7   1    3.02    1.91
   9  -8  -1    3.54    1.01
   9  -8  -1    4.54    1.64
   9  -8  -1    4.08    1.34
  -9   8   1    4.35    1.40
   8  -8  -1    6.66    1.16
   8  -8  -1    4.57    0.88
   8  -8  -1    6.25    1.41
  -8   8   1    7.69    1.28
   7  -8  -1   -1.16    0.78
   7  -8  -1   -0.24    0.47
   7  -8  -1    0.22    1.06
  -7   8   1    0.98    0.69
   6  -8  -1   21.45    0.64
   6  -8  -1   21.57    1.53
   5  -8  -1    0.85    0.84
   5  -8  -1    0.60    0.74
   4  -8  -1   56.25    2.23
   4  -8  -1   54.44    2.20
   3  -8  -1    5.16    0.80
  -3   8   1    4.56    0.52
  -3   8   1    4.02    0.45
   2  -8  -1   32.06    1.66
   2  -8  -1   34.79    1.80
  -2   8   1   33.71    1.32
   1  -8  -1   31.31    1.72
   1  -8  -1   32.47    1.77
  -1   8   1   36.07    1.70
  -1   8   1   35.00    1.40
   0  -8  -1    5.10    0.95
   0   8   1    5.06    0.75
   0   8   1    4.69    0.78
  -1  -8  -1   50.50    1.27
  -1  -8  -1   49.46    2.32
  -1  -8  -1   50.15    2.25
   1   8   1   47.98    1.43
   1   8   1   50.03    2.10
   1   8   1   51.59    2.01
  -2  -8  -1    0.35    0.83
  -2  -8  -1    0.83    0.37
  -2  -8  -1    0.39    0.86
   2   8   1    0.60    0.75
   2   8   1   -0.65    0.81
   2   8   1    0.59    0.58
  -3  -8  -1   38.95    2.28
  -3  -8  -1   34.80    2.18
  -3  -8  -1   37.42    1.56
   3   8   1   38.64    1.81
   3   8   1   40.94    2.27
  -4  -8  -1   -1.72    1.09
  -4  -8  -1   -0.98    0.65
  -4  -8  -1    1.33    1.11
   4   8   1    0.74    0.88
   4   8   1    0.28    1.01
   4   8   1    0.61    1.10
  -5  -8  -1   11.98    1.93
  -5  -8  -1    8.17    1.22
  -5  -8  -1   13.74    1.86
   5   8   1   11.15    1.65
   5   8   1   11.58    1.65
   5   8   1   10.07    1.74
  -6  -8  -1    4.53    1.72
  -6  -8  -1    5.20    1.81
  -6  -8  -1    7.19    1.44
   6   8   1    5.50    1.77
   6   8   1    2.15    1.57
   6   8   1    8.80    1.85
  -7  -8  -1    7.63    1.77
  -7  -8  -1    2.79    2.61
   7   8   1    2.86    2.25
   7   8   1    3.87    1.89
   8  -9  -1    0.20    0.48
   8  -9  -1   -1.53    1.24
   8  -9  -1   -2.81    1.41
   7  -9  -1    5.93    1.42
   7  -9  -1    4.99    1.15
   6  -9  -1    3.16    1.19
   5  -9  -1    0.39    0.82
   5  -9  -1   -0.12    0.93
   4  -9  -1    9.77    1.19
   3  -9  -1    8.87    1.22
   3  -9  -1   10.76    1.26
   2  -9  -1   24.72    1.78
   2  -9  -1   24.32    1.68
  -2   9   1   24.15    1.04
  -2   9   1   25.73    1.20
   1  -9  -1    4.49    1.44
   1  -9  -1    5.37    1.08
  -1   9   1    4.90    0.81
  -1   9   1    7.48    0.80
   0  -9  -1   35.78    2.09
   0  -9  -1   35.66    2.07
   0   9   1   36.68    1.83
   0   9   1   37.04    1.69
  -1  -9  -1    2.61    1.02
  -1  -9  -1    5.76    1.18
   1   9   1    6.05    1.00
   1   9   1    4.83    1.11
   1   9   1    4.32    0.52
  -2  -9  -1    5.03    0.61
  -2  -9  -1    4.85    1.34
  -2  -9  -1    3.68    1.17
   2   9   1    4.21    1.50
   2   9   1    4.09    0.75
   2   9   1    5.23    1.27
  -3  -9  -1    2.34    1.27
  -3  -9  -1    2.22    0.62
  -3  -9  -1    1.16    1.27
   3   9   1    3.12    1.35
   3   9   1    1.75    0.88
   3   9   1    1.84    1.05
  -4  -9  -1    0.06    0.79
  -4  -9  -1   -0.55    1.41
  -4  -9  -1    0.13    1.37
   4   9   1    1.01    1.21
   4   9   1   -0.69    1.50
  -5  -9  -1   11.53    2.24
  -5  -9  -1   10.43    1.36
   5   9   1    9.65    2.01
   5   9   1    8.27    1.89
   5   9   1    9.91    1.70
  -6  -9  -1    1.82    1.47
   6   9   1   -1.98    1.94
   6   9   1    2.99    2.14
   6   9   1    6.48    1.98
   7 -10  -1   -2.82    1.30
   7 -10  -1    0.55    1.51
   6 -10  -1   24.04    2.46
   6 -10  -1   26.25    2.19
   5 -10  -1    1.66    1.11
   4 -10  -1   31.03    2.22
   4 -10  -1   32.49    2.05
   3 -10  -1    2.25    1.03
   3 -10  -1    4.03    1.18
   2 -10  -1    3.37    1.24
   2 -10  -1    3.62    1.10
  -2  10   1    3.35    0.55
  -2  10   1    3.88    0.48
   1 -10  -1    5.99    1.32
   1 -10  -1    4.15    1.31
  -1  10   1    3.67    0.71
  -1  10   1    3.16    0.96
   0 -10  -1    0.51    1.15
   0 -10  -1    3.67    1.34
   0  10   1    0.62    0.91
   0  10   1   -0.93    0.76
  -1 -10  -1   12.20    1.79
  -1 -10  -1   12.87    1.73
   1  10   1   10.06    1.48
   1  10   1   14.25    1.65
  -2 -10  -1   -1.98    1.23
  -2 -10  -1    0.20    1.37
   2  10   1   -1.31    1.30
   2  10   1   -0.16    1.07
   2  10   1    0.08    0.60
  -3 -10  -1   10.10    0.98
  -3 -10  -1    8.08    1.72
  -3 -10  -1    7.81    1.76
   3  10   1   10.73    1.16
   3  10   1   11.37    1.71
   3  10   1    7.85    1.88
  -4 -10  -1   -1.06    1.89
  -4 -10  -1    1.17    0.88
   4  10   1    0.05    1.67
   4  10   1   -0.66    1.63
   4  10   1    0.81    1.16
   6 -11  -1    2.72    1.53
   5 -11  -1    3.38    1.60
   5 -11  -1    0.14    1.38
   4 -11  -1    4.37    1.54
   4 -11  -1    4.18    1.51
   3 -11  -1    2.24    1.44
   3 -11  -1    3.35    1.43
   2 -11  -1   11.02    1.70
   2 -11  -1   10.83    1.67
   1 -11  -1    2.88    1.61
   1 -11  -1    2.17    1.50
  -1  11   1    1.83    0.78
  -1  11   1    0.21    0.70
   0 -11  -1    3.42    1.67
   0 -11  -1    2.81    1.59
   0  11   1    3.21    1.04
   0  11   1    1.16    1.07
  -1 -11  -1   -2.70    1.58
  -1 -11  -1   -0.03    1.60
  -2 -11  -1    0.96    2.08
   2  11   1   -1.36    1.52
   2  11   1    0.98    1.56
   0 -12   2    1.33    1.98
   0 -12   2    3.99    1.98
   1 -12   2    5.24    1.85
   1 -12   2    4.58    1.82
   2 -12   2   13.75    2.06
   2 -12   2   21.68    2.38
   3 -12   2    4.00    1.60
   3 -12   2    3.36    1.59
   3  11  -2   10.75    1.74
   3  11  -2   11.78    1.72
  -3 -11   2    4.41    2.36
   2  11  -2   -0.62    1.23
   2  11  -2    1.52    1.20
  -2 -11   2    1.68    0.57
  -2 -11   2    4.48    1.78
  -2 -11   2    2.47    1.67
   1  11  -2   11.50    1.45
   1  11  -2   11.96    1.34
  -1 -11   2   13.36    1.97
  -1 -11   2   13.26    2.00
   0 -11   2    2.11    1.48
   0 -11   2    1.38    1.45
   1 -11   2    7.51    1.45
   1 -11   2    5.12    1.52
   2 -11   2   12.57    1.58
   2 -11   2   12.66    1.60
   3 -11   2    4.82    1.24
   3 -11   2    2.94    1.20
   4 -11   2    9.79    1.46
   4 -11   2    9.04    1.54
   5 -11   2    2.06    1.28
   5 -11   2    2.43    1.26
   6 -11   2   16.77    2.10
   5  10  -2    5.62    1.59
   5  10  -2   11.24    2.24
  -5 -10   2   10.53    4.07
   4  10  -2   -1.71    1.66
   4  10  -2    2.09    1.93
  -4 -10   2   -0.44    1.71
  -4 -10   2    0.90    1.08
   3  10  -2    4.05    1.03
   3  10  -2    3.13    1.43
   3  10  -2    3.02    1.20
  -3 -10   2    2.58    1.43
   2  10  -2    8.95    1.09
   2  10  -2    9.26    1.39
   2  10  -2    8.96    1.21
  -2 -10   2    5.09    1.56
  -2 -10   2   12.31    1.68
   1  10  -2    2.37    0.94
   1  10  -2    1.95    0.73
  -1 -10   2   -0.62    1.07
  -1 -10   2    0.78    1.19
   0 -10   2   36.41    2.28
   0 -10   2   32.99    2.22
   0 -10   2   34.57    0.96
   1 -10   2   11.62    1.61
   1 -10   2   12.12    1.53
   2 -10   2   20.97    1.63
   2 -10   2   17.20    1.66
   3 -10   2   -0.19    0.83
   3 -10   2    0.88    0.84
   4 -10   2    6.87    1.12
   4 -10   2    5.09    1.05
   5 -10   2    2.89    0.95
   6 -10   2    4.37    1.24
   6 -10   2    4.29    1.12
   7 -10   2   11.57    1.52
   7 -10   2   10.92    1.56
   8 -10   2   -0.37    1.24
   8 -10   2    3.69    1.56
   6   9  -2    5.19    1.94
   6   9  -2    0.95    1.66
   6   9  -2    0.38    1.90
  -6  -9   2   -1.22    1.41
  -6  -9   2   -1.03    2.08
   5   9  -2   14.43    2.03
   5   9  -2   16.21    1.82
   5   9  -2   14.52    1.85
  -5  -9   2   17.55    2.15
  -5  -9   2   15.38    2.09
   4   9  -2   -0.64    1.09
   4   9  -2   -1.08    1.06
   4   9  -2   -2.29    1.27
  -4  -9   2    0.86    1.36
  -4  -9   2   -0.32    1.29
   3   9  -2   26.35    1.72
   3   9  -2   26.99    2.13
  -3  -9   2   25.36    2.16
  -3  -9   2   29.96    2.37
   2   9  -2   -1.32    0.71
   2   9  -2   -0.26    0.89
  -2  -9   2    1.35    1.00
  -2  -9   2   -0.21    0.96
   1   9  -2   24.57    1.53
   1   9  -2   25.42    0.99
   1   9  -2   26.54    1.38
  -1  -9   2   23.73    1.79
  -1  -9   2   21.21    1.81
   0   9  -2    2.42    0.52
   0   9  -2    3.24    0.64
   0  -9   2    3.73    0.99
   0  -9   2    3.37    0.92
   0  -9   2    3.26    0.48
  -1   9  -2    3.39    0.29
   1  -9   2    2.64    0.81
   1  -9   2    2.99    0.90
   1  -9   2    3.20    0.39
   2  -9   2   14.54    1.28
   2  -9   2   13.25    1.24
   3  -9   2    1.03    0.66
   3  -9   2    0.56    0.66
   4  -9   2   12.40    1.18
   5  -9   2    7.02    0.94
   5  -9   2    6.17    1.03
   6  -9   2   15.99    1.57
   6  -9   2   15.72    1.38
   7  -9   2    1.38    0.85
   7  -9   2    0.58    0.28
   7  -9   2    0.70    0.34
   7  -9   2   -0.91    0.94
   8  -9   2    6.87    1.37
   8  -9   2    7.44    0.92
   9  -9   2    2.28    1.35
   9  -9   2    1.46    1.47
   7   8  -2   14.77    2.13
   7   8  -2   11.42    2.11
   7   8  -2   12.37    2.18
  -7  -8   2   14.11    2.62
  -7  -8   2    7.40    2.07
   6   8  -2    1.26    1.53
   6   8  -2    2.25    1.43
   6   8  -2    1.95    1.36
  -6  -8   2    0.74    1.51
  -6  -8   2   -0.28    1.46
   5   8  -2   14.14    1.86
   5   8  -2   15.54    1.92
   5   8  -2   18.85    1.99
  -5  -8   2   14.86    1.96
  -5  -8   2   15.08    1.91
   4   8  -2    0.28    1.09
   4   8  -2    2.04    0.93
   4   8  -2    1.27    0.96
  -4  -8   2    2.17    1.22
  -4  -8   2    3.80    1.24
   3   8  -2    5.08    0.96
   3   8  -2    3.32    0.82
   3   8  -2    4.37    1.04
  -3  -8   2    4.28    1.07
  -3  -8   2    4.22    1.08
   2   8  -2    6.77    0.98
  -2  -8   2    6.10    1.08
  -2  -8   2    7.29    1.11
   1   8  -2   -0.60    0.35
   1   8  -2   -0.04    0.47
   1   8  -2   -0.20    0.53
  -1  -8   2   -0.95    0.62
  -1  -8   2   -0.04    0.68
   0   8  -2   10.12    0.88
   0   8  -2   11.84    0.75
   0  -8   2   10.95    1.19
   0  -8   2    9.38    1.19
  -1   8  -2    2.52    0.33
  -1   8  -2    2.47    0.31
   1  -8   2    3.65    0.71
   1  -8   2    3.13    0.44
   1  -8   2    1.85    0.65
   2  -8   2   79.55    2.54
   2  -8   2   82.80    2.54
   2  -8   2   80.56    2.03
   3  -8   2    5.19    0.68
   4  -8   2   13.04    1.13
   4  -8   2   13.10    1.05
   5  -8   2   13.48    1.19
   5  -8   2   12.64    1.04
   6  -8   2    3.35    0.41
   6  -8   2    2.31    0.83
   6  -8   2    3.63    0.51
   6  -8   2    3.43    0.73
   7  -8   2   13.51    1.45
   7  -8   2   13.58    1.24
   8  -8   2   -0.57    0.97
   8  -8   2    0.48    0.88
   8  -8   2   -0.10    0.78
  -9   8  -2   28.94    2.50
   9  -8   2   20.43    2.17
   9  -8   2   22.92    1.83
   9  -8   2   23.16    2.06
   8   7  -2    1.93    1.71
   8   7  -2    4.15    1.99
  -8  -7   2    2.76    1.80
  -8  -7   2    2.62    2.14
   7   7  -2    5.48    1.64
   7   7  -2   10.49    1.92
   7   7  -2    7.57    1.61
  -7  -7   2    9.57    1.79
  -7  -7   2    5.33    1.76
   6   7  -2    3.83    1.27
   6   7  -2    0.20    1.21
   6   7  -2    0.21    1.15
  -6  -7   2    2.42    1.29
  -6  -7   2    3.68    1.33
   5   7  -2   14.60    1.64
   5   7  -2   13.46    1.70
   5   7  -2   15.29    1.64
  -5  -7   2   13.83    1.75
  -5  -7   2   13.58    1.64
   4   7  -2    3.73    0.95
   4   7  -2    4.34    0.92
   4   7  -2    4.47    1.25
  -4  -7   2    3.74    0.99
  -4  -7   2    3.78    1.03
   3   7  -2   15.55    1.33
   3   7  -2   16.18    1.21
   3   7  -2   14.76    1.28
  -3  -7   2   15.40    1.46
  -3  -7   2   13.73    1.38
   2   7  -2    1.06    0.49
   2   7  -2    0.10    0.45
   2   7  -2    0.92    0.57
  -2  -7   2    0.35    0.66
  -2  -7   2   -0.24    0.59
   1   7  -2   39.72    1.50
   1   7  -2   35.74    1.51
   1   7  -2   39.76    1.30
  -1  -7   2   39.50    1.79
  -1  -7   2   38.20    1.73
   0   7  -2    0.33    0.38
   0   7  -2    0.24    0.30
   0   7  -2    0.19    0.19
   0  -7   2    1.03    0.52
   0  -7   2    1.05    0.49
  -1   7  -2    8.69    0.52
  -1   7  -2   10.01    0.48
   1  -7   2    8.08    0.86
   1  -7   2    9.20    0.80
   1  -7   2    8.62    0.60
   2  -7   2   35.17    1.42
   2  -7   2   36.45    1.21
   2  -7   2   37.31    1.45
   3  -7   2   -0.32    0.32
   3  -7   2   -0.16    0.40
   3  -7   2   -0.13    0.37
   4  -7   2   24.63    0.64
   4  -7   2   26.80    0.65
   4  -7   2   24.51    1.18
   4  -7   2   26.56    1.24
   5  -7   2    6.33    0.76
   5  -7   2    6.74    0.58
   5  -7   2    5.98    0.76
  -6   7  -2   61.35    2.22
   6  -7   2   57.77    2.10
   6  -7   2   60.48    2.05
   6  -7   2   62.61    1.89
  -7   7  -2    2.88    0.84
   7  -7   2    1.76    0.68
   7  -7   2    0.82    0.71
   7  -7   2    1.35    0.54
  -8   7  -2   11.45    1.75
   8  -7   2   13.30    1.34
   8  -7   2   13.13    1.64
   8  -7   2   13.35    1.42
  -9   7  -2    3.03    1.34
   9  -7   2    0.82    1.15
   9  -7   2    1.20    1.07
 -10   7  -2    1.90    1.64
  10  -7   2   -1.26    1.29
  10  -7   2   -0.89    1.29
  10  -7   2   -2.14    1.45
   9   6  -2   14.43    2.63
  -9  -6   2   16.66    2.64
  -9  -6   2   14.26    3.00
   8   6  -2    1.88    1.60
   8   6  -2    1.19    1.43
   8   6  -2   -3.51    1.39
  -8  -6   2   -0.59    1.50
  -8  -6   2    1.88    1.63
  -8  -6   2   -2.61    1.53
   7   6  -2   26.62    2.26
   7   6  -2   25.54    2.08
   7   6  -2   29.82    2.53
  -7  -6   2   25.57    2.28
  -7  -6   2   23.24    2.27
   6   6  -2    1.09    1.05
   6   6  -2    0.68    0.94
   6   6  -2    2.23    0.96
  -6  -6   2   -0.33    0.95
  -6  -6   2    2.35    1.07
   5   6  -2   20.57    1.58
   5   6  -2   21.76    1.70
  -5  -6   2   22.93    1.74
  -5  -6   2   20.76    1.78
   4   6  -2    2.66    0.80
   4   6  -2    0.71    0.69
   4   6  -2    0.33    0.59
  -4  -6   2    0.48    0.65
  -4  -6   2    0.67    0.70
   3   6  -2    0.42    0.51
   3   6  -2    0.49    0.60
   3   6  -2   -0.77    0.46
  -3  -6   2    0.09    0.61
  -3  -6   2    0.49    0.61
   2   6  -2   55.02    1.87
   2   6  -2   53.01    1.91
   2   6  -2   55.81    1.78
  -2  -6   2   55.41    2.05
  -2  -6   2   56.66    2.12
   1   6  -2    1.35    0.47
   1   6  -2    1.01    0.35
  -1  -6   2    0.92    0.44
  -1  -6   2    1.17    0.47
   0   6  -2   84.38    2.16
   0   6  -2   82.59    1.89
   0   6  -2   84.10    2.13
   0  -6   2   85.47    2.42
   0  -6   2   84.92    2.45
  -1   6  -2    1.64    0.22
  -1   6  -2    1.76    0.26
   1  -6   2    1.29    0.40
   1  -6   2    1.36    0.32
   1  -6   2    1.97    0.43
   2  -6   2   71.45    1.88
   2  -6   2   71.88    2.02
   3  -6   2    1.63    0.41
   3  -6   2    1.50    0.16
   3  -6   2    1.20    0.31
   3  -6   2    1.64    0.40
   4  -6   2   12.81    0.83
   4  -6   2   13.76    0.81
  -5   6  -2   11.53    0.92
   5  -6   2   10.77    0.76
  -6   6  -2    0.75    0.61
   6  -6   2    1.51    0.57
   6  -6   2    1.77    0.49
  -7   6  -2   42.44    2.04
   7  -6   2   41.60    1.71
   7  -6   2   42.74    1.81
   7  -6   2   42.35    1.86
  -8   6  -2    0.54    1.02
   8  -6   2    1.13    0.75
   8  -6   2    1.45    0.84
   8  -6   2    0.58    0.81
  -9   6  -2   31.77    2.44
   9  -6   2   32.85    2.18
   9  -6   2   28.71    1.85
   9  -6   2   34.20    2.08
 -10   6  -2    0.53    1.63
  10  -6   2    1.02    1.46
  10  -6   2   -2.04    1.09
  10  -6   2    1.27    1.45
   9   5  -2    3.01    1.61
   9   5  -2    2.70    1.67
   9   5  -2    0.57    2.08
  -9  -5   2    1.54    1.70
  -9  -5   2    4.52    1.71
  -9  -5   2    9.04    1.90
   8   5  -2    0.00    1.16
   8   5  -2    2.18    1.39
   8   5  -2    0.43    1.34
  -8  -5   2    0.72    1.25
  -8  -5   2   -1.40    1.25
   7   5  -2   11.34    1.49
   7   5  -2   10.59    1.43
   7   5  -2   10.02    1.57
  -7  -5   2    5.42    1.31
  -7  -5   2    7.88    1.38
   6   5  -2    0.34    0.74
   6   5  -2    1.23    0.89
   6   5  -2    0.23    0.78
  -6  -5   2    0.55    0.89
  -6  -5   2    0.26    0.87
   5   5  -2    3.89    0.82
   5   5  -2    4.34    0.87
   5   5  -2    4.60    0.95
  -5  -5   2    4.36    0.96
  -5  -5   2    2.30    0.79
   4   5  -2   16.49    1.24
   4   5  -2   17.03    1.19
   4   5  -2   15.91    1.18
  -4  -5   2   17.74    1.31
  -4  -5   2   16.25    1.27
   3   5  -2   30.91    1.39
   3   5  -2   30.78    1.47
   3   5  -2   30.54    1.43
  -3  -5   2   30.26    1.50
  -3  -5   2   32.36    1.53
   2   5  -2    2.27    0.47
   2   5  -2    2.31    0.51
   2   5  -2    3.22    0.48
  -2  -5   2    2.18    0.50
  -2  -5   2    2.42    0.55
   1   5  -2   16.27    0.76
   1   5  -2   17.46    0.90
   1   5  -2   18.11    0.84
  -1  -5   2   17.29    0.95
  -1  -5   2   16.32    0.92
   0   5  -2    0.48    0.17
   0   5  -2    0.44    0.27
   0   5  -2    0.58    0.18
   0  -5   2    0.72    0.30
   0  -5   2    0.90    0.36
  -1   5  -2    1.21    0.19
  -1   5  -2    1.35    0.17
   1  -5   2    1.28    0.29
   1  -5   2    1.10    0.31
   1  -5   2    1.48    0.32
   2  -5   2    8.12    0.56
   2  -5   2    7.07    0.49
   2  -5   2    8.28    0.55
   2  -5   2    7.10    0.28
   3  -5   2    4.62    0.54
   3  -5   2    5.08    0.48
   3  -5   2    4.61    0.43
  -4   5  -2    4.96    0.57
   4  -5   2    5.01    0.49
   4  -5   2    4.30    0.54
   4  -5   2    4.73    0.65
  -5   5  -2    7.13    0.78
   5  -5   2    6.94    0.69
   5  -5   2    6.55    0.59
  -6   5  -2    7.56    0.97
   6  -5   2    7.10    0.73
   6  -5   2    6.60    0.83
  -7   5  -2    3.16    0.86
   7  -5   2    1.51    0.65
   7  -5   2    1.77    0.58
   8  -5   2   -0.41    0.80
   8  -5   2    0.13    0.67
  -9   5  -2    0.64    1.10
   9  -5   2   -1.15    1.02
   9  -5   2    0.90    1.07
   9  -5   2   -0.04    0.77
 -10   5  -2   -1.37    1.47
  10  -5   2   -0.66    1.06
  10  -5   2   -0.87    1.36
  10  -5   2   -0.85    1.37
 -11   5  -2   11.57    2.48
  11  -5   2    7.60    2.12
  11  -5   2    7.61    1.74
  11  -5   2    9.81    2.17
  10   4  -2   -4.65    1.91
 -10  -4   2    0.99    2.20
 -10  -4   2    2.45    2.15
 -10  -4   2   -4.12    2.00
   9   4  -2   14.36    1.86
   9   4  -2   15.71    2.00
   9   4  -2   15.48    2.15
  -9  -4   2   15.06    2.07
  -9  -4   2   15.41    2.03
  -9  -4   2   16.51    2.23
   8   4  -2   -0.53    1.15
   8   4  -2    1.01    1.26
   8   4  -2    0.40    0.95
  -8  -4   2    1.68    1.18
  -8  -4   2    1.70    1.19
   7   4  -2   59.08    2.57
   7   4  -2   52.86    2.64
   7   4  -2   55.47    2.61
  -7  -4   2   56.62    2.61
  -7  -4   2   56.01    2.62
   6   4  -2    1.58    0.68
   6   4  -2    3.39    0.96
  -6  -4   2    2.59    0.87
  -6  -4   2    2.75    0.75
   5   4  -2   13.26    1.13
   5   4  -2   14.89    1.20
   5   4  -2   14.66    1.26
  -5  -4   2   16.58    1.29
  -5  -4   2   13.59    1.19
   4   4  -2    1.63    0.54
   4   4  -2    1.84    0.51
   4   4  -2    2.08    0.61
  -4  -4   2    1.08    0.56
  -4  -4   2    2.02    0.51
   3   4  -2    0.94    0.35
   3   4  -2    0.81    0.49
   3   4  -2    1.53    0.49
  -3  -4   2    1.23    0.46
  -3  -4   2    1.42    0.47
   2   4  -2   96.70    2.46
   2   4  -2   99.25    2.55
   2   4  -2   97.37    2.57
  -2  -4   2   96.18    2.64
  -2  -4   2   95.54    2.64
   1   4  -2   10.91    0.68
   1   4  -2   10.95    0.60
   1   4  -2   12.64    0.62
  -1  -4   2   11.50    0.70
  -1  -4   2   11.77    0.74
   0   4  -2   81.17    1.82
   0   4  -2   81.73    1.93
   0   4  -2   83.22    1.92
   0  -4   2   86.35    2.08
   0  -4   2   82.91    2.08
  -1   4  -2    3.69    0.15
   1  -4   2    3.75    0.22
   1  -4   2    3.17    0.34
   2  -4   2  135.67    2.89
   2  -4   2  136.50    2.90
   2  -4   2  142.78    3.09
   2  -4   2  137.15    2.79
  -3   4  -2   17.36    0.79
   3  -4   2   16.64    0.64
   3  -4   2   16.85    0.66
   3  -4   2   16.85    0.83
  -4   4  -2   28.77    1.18
   4  -4   2   26.38    1.21
   4  -4   2   25.02    0.95
   4  -4   2   26.24    0.93
  -5   4  -2   28.04    1.32
   5  -4   2   25.96    1.04
   5  -4   2   25.62    1.09
  -6   4  -2    6.76    0.88
   6  -4   2    7.55    0.80
   6  -4   2    8.27    0.69
  -7   4  -2   40.51    1.99
   7  -4   2   39.30    1.62
   7  -4   2   38.87    1.73
  -8   4  -2    0.42    1.11
   8  -4   2    1.83    0.63
   8  -4   2    2.23    0.86
  -9   4  -2   25.72    2.17
   9  -4   2   25.96    2.02
   9  -4   2   24.90    1.74
 -10   4  -2   -0.72    1.38
  10  -4   2    1.59    1.18
  10  -4   2   -0.25    1.30
  10  -4   2    1.72    0.99
 -11   4  -2   17.37    2.58
  11  -4   2   17.91    2.10
  11  -4   2   18.33    2.28
  11  -4   2   16.39    2.27
  10   3  -2   -0.58    1.57
 -10  -3   2   -0.41    1.63
 -10  -3   2   -2.00    1.48
 -10  -3   2   -0.58    1.65
   9   3  -2   -1.24    1.37
   9   3  -2    0.01    1.33
   9   3  -2    2.62    1.18
  -9  -3   2    0.59    1.43
  -9  -3   2    0.36    1.28
  -9  -3   2    1.86    1.32
   8   3  -2    0.77    1.10
   8   3  -2    0.18    1.05
  -8  -3   2    1.36    1.03
  -8  -3   2   -1.03    0.87
   7   3  -2    3.81    0.96
   7   3  -2    5.06    1.12
   7   3  -2    2.61    0.81
  -7  -3   2    3.51    1.00
   6   3  -2    3.23    0.76
   6   3  -2    4.22    0.90
   6   3  -2    3.17    0.85
  -6  -3   2    3.87    0.83
  -6  -3   2    3.23    0.83
   5   3  -2   16.33    1.20
   5   3  -2   18.31    1.26
   5   3  -2   17.58    1.15
  -5  -3   2   17.46    1.20
  -5  -3   2   17.98    1.22
   4   3  -2   15.08    0.94
   4   3  -2   13.29    0.98
   4   3  -2   12.47    0.94
  -4  -3   2   15.19    0.99
  -4  -3   2   13.23    0.97
   3   3  -2   73.00    2.12
   3   3  -2   72.27    2.13
   3   3  -2   76.46    2.51
  -3  -3   2   72.40    2.14
  -3  -3   2   73.87    2.21
   2   3  -2   16.59    0.81
   2   3  -2   16.95    0.86
   2   3  -2   17.13    0.80
  -2  -3   2   18.12    0.88
  -2  -3   2   17.83    0.87
   1   3  -2    1.20    0.29
   1   3  -2    1.11    0.24
   1   3  -2    1.29    0.26
  -1  -3   2    1.33    0.31
  -1  -3   2    1.00    0.27
   0   3  -2    0.28    0.16
   0   3  -2    0.09    0.14
   0  -3   2    0.28    0.17
   0  -3   2    0.25    0.11
   0  -3   2    0.02    0.17
   1  -3   2    0.19    0.10
   1  -3   2    0.13    0.13
   1  -3   2    0.26    0.12
   1  -3   2    0.42    0.22
  -2   3  -2   43.40    1.25
   2  -3   2   42.70    0.99
   2  -3   2   42.83    0.99
   2  -3   2   43.39    1.28
  -3   3  -2  100.89    2.53
   3  -3   2  104.06    2.20
   3  -3   2  101.79    2.56
   3  -3   2  100.78    2.20
  -4   3  -2    4.21    0.55
   4  -3   2    3.73    0.43
   4  -3   2    3.26    0.36
  -5   3  -2   15.23    1.00
  -5   3  -2   15.78    0.41
   5  -3   2   16.83    0.87
   5  -3   2   16.02    0.79
  -6   3  -2   25.99    0.82
  -6   3  -2   26.60    0.79
  -6   3  -2   29.18    1.49
   6  -3   2   26.16    1.20
   6  -3   2   27.41    1.28
  -7   3  -2    1.40    0.34
  -7   3  -2    2.46    0.77
  -7   3  -2    1.25    0.28
   7  -3   2    0.21    0.53
   7  -3   2    1.08    0.48
  -8   3  -2   -0.19    0.36
  -8   3  -2   -0.16    1.04
  -8   3  -2    0.37    0.32
   8  -3   2   -1.52    0.70
   8  -3   2   -0.46    0.62
  -9   3  -2   -0.13    0.50
  -9   3  -2    0.70    1.06
   9  -3   2   -0.53    0.93
   9  -3   2    1.05    0.92
 -10   3  -2    4.72    0.68
 -10   3  -2    5.74    1.57
 -10   3  -2    4.34    0.61
  10  -3   2    6.23    1.29
  10  -3   2    7.30    1.61
  10  -3   2    6.70    1.47
 -11   3  -2    2.57    2.16
  11  -3   2    5.09    1.86
  11  -3   2    5.96    1.68
  11  -3   2    2.05    1.73
 -11  -2   2   15.51    2.30
 -11  -2   2   14.65    2.29
  10   2  -2    1.37    1.36
  10   2  -2   -1.09    1.47
  10   2  -2    1.05    1.61
 -10  -2   2   -0.08    1.49
 -10  -2   2    1.09    1.46
 -10  -2   2   -1.53    1.15
   9   2  -2   33.78    2.54
   9   2  -2   29.69    2.23
   9   2  -2   30.20    2.36
  -9  -2   2   31.81    2.36
  -9  -2   2   33.06    2.23
  -9  -2   2   29.22    2.45
   8   2  -2    6.79    1.30
   8   2  -2    5.79    1.08
   8   2  -2    6.40    1.34
  -8  -2   2    5.87    1.12
  -8  -2   2    6.27    1.19
   7   2  -2   42.98    2.01
   7   2  -2   40.55    2.08
   7   2  -2   35.53    1.98
  -7  -2   2   41.04    2.04
  -7  -2   2   40.19    2.29
   6   2  -2   -0.22    0.62
   6   2  -2   -0.27    0.49
   6   2  -2    0.50    0.59
  -6  -2   2   -1.26    0.53
  -6  -2   2    0.44    0.62
   5   2  -2   24.66    1.28
   5   2  -2   24.60    1.34
   5   2  -2   22.56    1.23
  -5  -2   2   25.44    1.31
  -5  -2   2   23.53    1.27
   4   2  -2   33.65    1.43
   4   2  -2   35.28    1.40
   4   2  -2   35.45    1.40
  -4  -2   2   33.76    1.42
  -4  -2   2   32.84    1.34
   3   2  -2   34.16    1.29
   3   2  -2   34.63    1.25
   3   2  -2   33.49    1.23
  -3  -2   2   32.11    1.25
  -3  -2   2   32.11    1.25
   2   2  -2    3.11    0.38
   2   2  -2    2.29    0.38
   2   2  -2    2.96    0.38
  -2  -2   2    2.87    0.39
  -2  -2   2    3.25    0.43
   1   2  -2  152.12    3.18
   1   2  -2  148.81    3.14
   1   2  -2  151.54    3.16
  -1  -2   2  148.87    3.17
  -1  -2   2  150.04    3.20
  -1  -2   2  150.06    3.15
   0   2  -2   17.79    0.50
   0   2  -2   16.90    0.54
   0   2  -2   17.38    0.48
   0  -2   2   17.58    0.54
   0  -2   2   17.73    0.54
   0  -2   2   17.82    0.54
   1  -2   2    1.22    0.18
   1  -2   2    0.96    0.24
  -2   2  -2  105.66    2.38
   2  -2   2  107.97    2.41
   2  -2   2   99.99    2.00
   2  -2   2   98.34    2.00
  -3   2  -2   16.48    0.81
   3  -2   2   17.23    0.59
   3  -2   2   16.96    0.63
   3  -2   2   17.10    0.85
  -4   2  -2    0.35    0.17
  -4   2  -2    0.15    0.27
  -4   2  -2    0.44    0.15
   4  -2   2    0.27    0.25
   4  -2   2    0.24    0.20
  -5   2  -2   49.32    1.34
  -5   2  -2   48.14    1.34
  -5   2  -2   48.55    1.83
   5  -2   2   49.88    1.61
   5  -2   2   50.14    1.56
  -6   2  -2    4.99    0.56
  -6   2  -2    4.99    0.48
  -6   2  -2    3.66    0.70
   6  -2   2    4.67    0.64
   6  -2   2    4.53    0.60
  -7   2  -2   53.20    2.34
  -7   2  -2   58.72    1.75
  -7   2  -2   56.80    1.77
   7  -2   2   57.07    2.19
   7  -2   2   57.61    2.06
  -8   2  -2    0.27    0.83
  -8   2  -2   -0.25    0.44
   8  -2   2   -0.09    0.60
   8  -2   2   -0.48    0.71
  -9   2  -2   10.60    1.51
  -9   2  -2   13.86    1.07
  -9   2  -2   12.56    1.23
   9  -2   2   10.46    1.34
   9  -2   2    9.77    1.42
 -10   2  -2    0.75    0.91
 -10   2  -2    1.09    0.76
 -10   2  -2    1.03    1.39
  10  -2   2   -0.76    1.27
  10  -2   2   -1.49    1.26
  10  -2   2    2.27    1.03
 -11   2  -2    5.88    1.13
 -11   2  -2    5.21    2.15
 -11   2  -2    6.20    1.03
  11  -2   2    3.47    1.73
  11  -2   2    7.66    1.92
  11  -2   2    6.19    1.70
  11   1  -2    8.66    2.04
 -11  -1   2    5.02    2.41
 -11  -1   2    8.00    2.12
 -11  -1   2    8.11    1.80
  10   1  -2    2.44    1.49
  10   1  -2    2.02    1.32
  10   1  -2    1.39    1.55
 -10  -1   2    4.24    1.47
 -10  -1   2   -0.62    1.40
 -10  -1   2    1.35    1.53
   9   1  -2    3.36    1.30
   9   1  -2    4.65    1.15
   9   1  -2    6.12    1.44
  -9  -1   2    6.94    1.22
  -9  -1   2    5.41    1.34
  -9  -1   2    5.73    1.25
   8   1  -2    0.60    0.73
   8   1  -2   -0.74    0.79
   8   1  -2    0.88    0.74
  -8  -1   2    1.34    0.82
  -8  -1   2    0.58    0.74
   7   1  -2    1.66    0.66
  -7  -1   2    0.39    0.62
  -7  -1   2    0.09    0.63
   6   1  -2    9.36    0.90
   6   1  -2    8.02    0.89
   6   1  -2    8.79    1.00
  -6  -1   2    9.82    0.93
  -6  -1   2    7.35    0.91
   5   1  -2   47.20    1.75
   5   1  -2   47.47    1.77
   5   1  -2   46.04    1.79
  -5  -1   2   46.83    1.75
  -5  -1   2   48.61    1.74
   4   1  -2   39.53    1.43
   4   1  -2   37.10    1.51
   4   1  -2   39.12    1.54
  -4  -1   2   39.35    1.44
  -4  -1   2   38.16    1.64
   3   1  -2   10.85    0.72
   3   1  -2   10.58    0.71
   3   1  -2   10.83    0.66
  -3  -1   2    9.79    0.64
  -3  -1   2   10.84    0.69
   2   1  -2  117.32    2.65
   2   1  -2  119.02    2.62
   2   1  -2  115.88    2.65
  -2  -1   2  113.31    2.64
  -2  -1   2  115.29    2.62
   1   1  -2    4.68    0.31
   1   1  -2    4.33    0.35
   1   1  -2    4.54    0.36
  -1  -1   2    4.56    0.32
  -1  -1   2    4.79    0.33
  -1  -1   2    4.68    0.34
   0   1  -2    0.43    0.07
   0   1  -2    0.27    0.12
   0  -1   2    0.34    0.11
   0  -1   2    0.38    0.09
   0  -1   2    0.38    0.08
  -1   1  -2   14.54    0.53
   1  -1   2   14.92    0.56
  -2   1  -2   14.19    0.40
  -2   1  -2   14.47    0.40
  -2   1  -2   15.06    0.66
   2  -1   2   14.15    0.48
   2  -1   2   14.15    0.68
   2  -1   2   14.28    0.46
  -3   1  -2   50.16    1.52
  -3   1  -2   47.59    1.21
  -3   1  -2   49.96    1.23
   3  -1   2   48.28    1.32
   3  -1   2   50.91    1.31
   3  -1   2   48.19    1.54
  -4   1  -2   18.82    0.74
  -4   1  -2   17.01    0.71
  -4   1  -2   17.70    0.93
   4  -1   2   16.85    0.79
   4  -1   2   18.47    0.85
  -5   1  -2   31.15    1.45
  -5   1  -2   32.36    1.14
  -5   1  -2   30.73    1.13
   5  -1   2   35.17    1.99
   5  -1   2   30.60    1.23
  -6   1  -2   34.70    1.32
  -6   1  -2   32.51    1.65
  -6   1  -2   35.20    1.32
   6  -1   2   36.06    1.47
   6  -1   2   33.71    1.50
  -7   1  -2   10.93    1.22
  -7   1  -2    9.86    0.85
  -7   1  -2   11.10    0.91
   7  -1   2    9.79    0.97
   7  -1   2   10.27    1.09
  -8   1  -2    1.94    0.87
  -8   1  -2    0.02    0.62
  -8   1  -2    0.58    0.52
   8  -1   2    0.73    0.72
   8  -1   2   -0.23    0.83
  -9   1  -2    0.72    0.82
  -9   1  -2    0.43    1.12
  -9   1  -2   -0.87    0.65
   9  -1   2   -0.01    0.84
   9  -1   2   -0.58    0.99
 -10   1  -2   17.87    1.84
 -10   1  -2   19.39    1.62
 -10   1  -2   18.24    2.31
  10  -1   2   17.74    2.12
  10  -1   2   17.84    1.90
  10  -1   2   17.86    2.08
 -11   1  -2    5.18    2.44
 -11   1  -2    7.15    2.34
 -11   1  -2    5.73    1.31
  11  -1   2    5.42    1.78
  11  -1   2    4.04    1.86
  11   0  -2    5.98    1.73
 -11   0   2    4.44    2.31
 -11   0   2    6.47    1.72
 -11   0   2    3.32    1.82
  10   0  -2    0.39    1.40
  10   0  -2    1.17    1.16
  10   0  -2    0.14    1.29
 -10   0   2    2.60    1.47
 -10   0   2    2.09    1.20
 -10   0   2    1.60    1.31
   9   0  -2   32.50    2.34
   9   0  -2   33.53    2.30
   9   0  -2   34.34    2.14
  -9   0   2   38.10    2.11
  -9   0   2   35.32    2.27
   8   0  -2    1.22    0.85
   8   0  -2    1.77    0.93
  -8   0   2    0.87    0.90
  -8   0   2   -0.01    0.69
  -8   0   2    1.54    0.77
   7   0  -2   46.43    2.11
   7   0  -2   47.27    2.01
   7   0  -2   44.48    2.07
  -7   0   2   45.90    1.96
  -7   0   2   43.60    1.87
   6   0  -2    1.68    0.58
   6   0  -2    1.49    0.60
   6   0  -2    0.95    0.43
  -6   0   2    1.72    0.54
  -6   0   2    1.21    0.54
   5   0  -2   50.97    1.86
   5   0  -2   51.76    1.80
   5   0  -2   52.56    1.87
  -5   0   2   55.26    1.79
  -5   0   2   52.15    1.78
   4   0  -2   42.01    1.50
   4   0  -2   43.91    1.47
   4   0  -2   40.91    1.49
  -4   0   2   42.47    1.45
  -4   0   2   41.93    1.43
   3   0  -2    1.10    0.33
   3   0  -2    1.48    0.35
   3   0  -2    1.20    0.30
  -3   0   2    1.68    0.31
  -3   0   2    1.47    0.33
   2   0  -2   51.44    1.34
   2   0  -2   50.90    1.37
   2   0  -2   49.79    1.36
  -2   0   2   49.37    1.33
  -2   0   2   50.74    1.35
  -2   0   2   49.75    1.35
   1   0  -2    7.73    0.38
   1   0  -2    8.04    0.39
   1   0  -2    7.75    0.36
  -1   0   2    7.49    0.37
  -1   0   2    7.93    0.36
  -1   0   2    8.09    0.38
  -1   0  -2  111.92    2.30
  -1   0  -2  118.81    2.42
  -1   0  -2  112.81    2.31
   1   0   2  116.38    2.32
   1   0   2  115.19    2.41
   1   0   2  112.29    2.33
  -2   0  -2   73.51    1.71
  -2   0  -2   74.41    1.73
  -2   0  -2   78.07    1.88
   2   0   2   72.85    1.76
   2   0   2   74.85    1.88
   2   0   2   78.20    1.76
  -3   0  -2    2.59    0.32
  -3   0  -2    2.79    0.44
  -3   0  -2    2.61    0.34
   3   0   2    3.15    0.40
   3   0   2    2.90    0.37
  -4   0  -2    2.87    0.47
  -4   0  -2    2.42    0.36
  -4   0  -2    2.48    0.41
   4   0   2    2.78    0.42
   4   0   2    2.47    0.44
  -5   0  -2   67.51    2.27
  -5   0  -2   70.22    2.03
  -5   0  -2   66.06    1.96
   5   0   2   67.73    2.13
   5   0   2   68.18    2.08
  -6   0  -2    5.41    0.68
  -6   0  -2    8.45    0.95
  -6   0  -2    5.82    0.71
   6   0   2    5.82    0.79
   6   0   2    5.76    0.81
  -7   0  -2   52.37    2.29
  -7   0  -2   51.35    1.96
  -7   0  -2   53.23    1.97
   7   0   2   50.36    2.08
   7   0   2   50.60    2.20
  -8   0  -2   -0.47    0.60
  -8   0  -2    0.20    0.62
  -8   0  -2    0.65    0.73
   8   0   2    0.92    0.82
   8   0   2    0.42    0.73
  -9   0  -2   22.08    1.65
  -9   0  -2   25.17    1.86
  -9   0  -2   25.11    2.20
   9   0   2   20.73    2.01
   9   0   2   20.70    1.85
 -10   0  -2   -3.05    1.32
 -10   0  -2   -0.93    1.15
 -10   0  -2   -1.19    1.19
  10   0   2    1.71    1.11
  10   0   2    2.32    1.40
  10   0   2   -1.76    1.37
 -11   0  -2   20.10    2.85
 -11   0  -2   19.21    2.10
 -11   0  -2   17.97    2.23
  11   0   2   18.28    2.29
  11  -1  -2    7.81    2.00
  11  -1  -2    7.59    2.10
  11  -1  -2    8.11    1.82
 -11   1   2    6.66    1.76
 -11   1   2    8.54    1.57
 -11   1   2    9.75    2.39
  10  -1  -2    0.61    1.26
  10  -1  -2    1.26    1.33
  10  -1  -2   -0.96    1.18
 -10   1   2    0.06    1.07
 -10   1   2   -0.59    1.19
 -10   1   2    1.24    1.51
   9  -1  -2    3.60    0.96
   9  -1  -2    1.18    1.13
   9  -1  -2    2.35    1.13
  -9   1   2    6.23    1.32
  -9   1   2    3.70    1.04
  -9   1   2    2.08    0.87
   8  -1  -2    0.36    0.82
   8  -1  -2    0.53    0.80
   8  -1  -2    0.75    0.68
  -8   1   2    0.32    0.72
  -8   1   2    1.30    0.70
  -8   1   2   -0.59    0.78
   7  -1  -2    2.98    0.77
   7  -1  -2    2.91    0.68
   7  -1  -2    2.88    0.78
  -7   1   2    1.71    0.61
  -7   1   2    2.50    0.59
  -7   1   2    1.92    0.79
   6  -1  -2    9.71    0.86
   6  -1  -2   10.06    1.00
   6  -1  -2    9.66    1.00
  -6   1   2   11.44    0.93
  -6   1   2   10.77    0.86
   5  -1  -2   22.35    1.09
   5  -1  -2   21.33    1.09
   5  -1  -2   24.29    1.19
  -5   1   2   21.71    1.06
  -5   1   2   21.49    1.07
   4  -1  -2   57.42    1.71
   4  -1  -2   56.29    1.75
   4  -1  -2   55.89    1.76
  -4   1   2   55.61    1.66
  -4   1   2   56.67    1.67
   3  -1  -2    3.45    0.45
   3  -1  -2    3.93    0.47
   3  -1  -2    4.02    0.42
  -3   1   2    3.08    0.38
  -3   1   2    3.50    0.43
   2  -1  -2   12.97    0.62
   2  -1  -2   14.05    0.61
   2  -1  -2   14.64    0.60
  -2   1   2   13.80    0.57
  -2   1   2   13.47    0.60
  -2   1   2   15.28    0.62
   1  -1  -2    6.66    0.34
   1  -1  -2    6.81    0.38
   1  -1  -2    7.04    0.40
  -1   1   2    7.25    0.38
  -1   1   2    7.02    0.32
  -1   1   2    7.40    0.40
   0  -1  -2   -0.29    0.13
   0   1   2   -0.30    0.14
   0   1   2   -0.28    0.08
   0   1   2   -0.22    0.13
   0   1   2   -0.30    0.08
  -1  -1  -2   17.14    0.65
  -1  -1  -2   18.35    0.61
  -1  -1  -2   17.66    0.66
   1   1   2   17.90    0.61
   1   1   2   17.81    0.66
   1   1   2   17.70    0.68
  -2  -1  -2    2.50    0.34
  -2  -1  -2    2.51    0.35
  -2  -1  -2    2.96    0.37
   2   1   2    2.53    0.38
   2   1   2    2.81    0.33
  -3  -1  -2   14.64    0.74
  -3  -1  -2   15.02    0.81
  -3  -1  -2   15.34    0.77
   3   1   2   14.49    0.80
   3   1   2   15.26    0.77
  -4  -1  -2   20.79    0.98
  -4  -1  -2   20.00    1.09
  -4  -1  -2   20.12    0.98
   4   1   2   20.25    1.21
   4   1   2   20.24    1.00
  -5  -1  -2   20.84    1.23
  -5  -1  -2   19.22    1.09
  -5  -1  -2   19.93    1.06
   5   1   2   19.96    1.18
   5   1   2   20.82    1.12
  -6  -1  -2   -0.22    0.42
  -6  -1  -2    0.02    0.44
  -6  -1  -2    0.04    0.54
   6   1   2    0.36    0.54
   6   1   2    0.03    0.40
  -7  -1  -2    4.29    0.99
  -7  -1  -2    3.76    0.79
  -7  -1  -2    4.88    0.87
   7   1   2    4.55    1.06
   7   1   2    3.60    0.77
  -8  -1  -2    4.60    1.00
  -8  -1  -2    4.15    0.98
  -8  -1  -2    4.09    0.94
   8   1   2    2.54    1.03
   8   1   2    6.24    1.02
  -9  -1  -2   -0.02    1.15
  -9  -1  -2    1.68    1.07
   9   1   2    2.02    1.04
   9   1   2    3.00    1.22
 -10  -1  -2    0.50    1.22
 -10  -1  -2    2.13    1.47
 -10  -1  -2    1.39    1.39
  10   1   2    0.39    1.39
  10   1   2    2.24    1.52
  10   1   2    0.00    1.24
 -11  -1  -2    8.24    1.95
 -11  -1  -2    7.94    2.60
 -11  -1  -2    5.52    1.72
  11   1   2    2.09    1.93
  11  -2  -2   26.44    3.04
  11  -2  -2   33.55    3.25
  11  -2  -2   34.58    2.85
 -11   2   2   36.51    3.40
 -11   2   2   40.92    2.54
  10  -2  -2    5.09    1.55
  10  -2  -2    2.92    1.28
  10  -2  -2    6.65    1.64
 -10   2   2    2.31    1.02
 -10   2   2    5.52    1.48
 -10   2   2    4.65    1.27
   9  -2  -2   46.38    2.47
   9  -2  -2   38.38    2.42
   9  -2  -2   43.49    2.30
  -9   2   2   41.79    1.98
  -9   2   2   42.20    2.11
  -9   2   2   39.71    2.47
   8  -2  -2    0.03    0.69
   8  -2  -2   -0.01    0.67
   8  -2  -2    0.46    0.81
  -8   2   2   -0.67    0.53
  -8   2   2    0.84    0.70
   7  -2  -2   39.47    1.75
   7  -2  -2   38.38    1.85
   7  -2  -2   37.61    1.82
  -7   2   2   35.35    1.54
  -7   2   2   38.09    1.91
  -7   2   2   38.36    1.61
   6  -2  -2   -0.10    0.48
   6  -2  -2   -0.15    0.46
   6  -2  -2    0.74    0.45
  -6   2   2    0.45    0.52
  -6   2   2    0.19    0.42
  -6   2   2   -0.01    0.36
   5  -2  -2   31.04    1.32
   5  -2  -2   28.76    1.23
   5  -2  -2   28.33    1.27
  -5   2   2   28.19    1.13
  -5   2   2   30.11    1.19
   4  -2  -2   28.57    1.14
   4  -2  -2   29.46    1.13
   4  -2  -2   27.43    1.18
  -4   2   2   29.01    1.09
  -4   2   2   28.50    1.06
   3  -2  -2   33.75    1.13
   3  -2  -2   33.75    1.10
   3  -2  -2   34.07    1.17
  -3   2   2   33.28    1.10
  -3   2   2   34.56    1.09
   2  -2  -2   40.83    1.08
   2  -2  -2   42.14    1.23
   2  -2  -2   39.94    1.19
  -2   2   2   40.62    1.18
  -2   2   2   40.78    1.16
   1  -2  -2    6.78    0.30
   1  -2  -2    6.60    0.44
   1  -2  -2    6.96    0.47
  -1   2   2    7.42    0.46
  -1   2   2    7.44    0.30
  -1   2   2    7.39    0.43
   0  -2  -2  158.40    3.39
   0  -2  -2  157.64    3.41
   0   2   2  159.81    3.38
   0   2   2  162.98    3.41
  -1  -2  -2    5.94    0.35
  -1  -2  -2    6.69    0.49
  -1  -2  -2    5.60    0.48
   1   2   2    5.74    0.45
   1   2   2    6.31    0.52
  -2  -2  -2   14.47    0.75
  -2  -2  -2   14.00    0.66
  -2  -2  -2   13.71    0.74
   2   2   2   13.47    0.69
   2   2   2   13.28    0.77
  -3  -2  -2    1.57    0.41
  -3  -2  -2    0.57    0.30
  -3  -2  -2    0.98    0.35
   3   2   2    1.69    0.43
   3   2   2    1.07    0.36
  -4  -2  -2   16.50    0.99
  -4  -2  -2   16.25    0.97
  -4  -2  -2   18.54    1.05
   4   2   2   16.67    1.04
   4   2   2   16.90    0.98
  -5  -2  -2   54.58    1.96
  -5  -2  -2   52.61    2.02
  -5  -2  -2   54.75    1.99
   5   2   2   54.68    2.05
   5   2   2   56.27    2.01
  -6  -2  -2    2.28    0.68
  -6  -2  -2    2.11    0.73
  -6  -2  -2    1.94    0.68
   6   2   2    2.58    0.66
   6   2   2    2.85    0.81
  -7  -2  -2   43.13    2.05
  -7  -2  -2   43.31    2.06
  -7  -2  -2   45.29    2.14
   7   2   2   38.80    2.12
   7   2   2   42.12    2.01
  -8  -2  -2    0.32    0.92
  -8  -2  -2   -0.47    0.78
  -8  -2  -2   -0.58    0.96
   8   2   2    0.57    0.84
   8   2   2   -0.17    1.04
  -9  -2  -2   16.68    1.88
  -9  -2  -2   16.10    2.09
  -9  -2  -2   15.72    1.89
   9   2   2   16.96    2.01
   9   2   2   18.47    1.97
 -10  -2  -2    0.69    1.61
 -10  -2  -2    0.94    1.50
 -10  -2  -2    0.83    1.46
  10   2   2   -0.13    1.62
  10   2   2   -2.62    1.51
  10   2   2    1.25    1.49
 -11  -2  -2    4.08    2.08
 -11  -2  -2    4.29    1.91
  11  -3  -2    6.74    2.03
  11  -3  -2   10.35    2.02
  11  -3  -2    6.92    1.73
 -11   3   2    7.52    1.28
 -11   3   2    6.47    1.33
 -11   3   2    6.61    2.12
  10  -3  -2    0.17    1.27
  10  -3  -2   -1.40    1.08
  10  -3  -2   -1.23    1.37
 -10   3   2    2.56    1.35
 -10   3   2   -0.91    0.81
 -10   3   2   -0.41    0.99
   9  -3  -2   21.92    1.72
   9  -3  -2   23.22    1.96
   9  -3  -2   24.42    2.06
  -9   3   2   24.93    2.04
  -9   3   2   22.32    1.40
  -9   3   2   21.43    1.59
   8  -3  -2   12.76    1.28
   8  -3  -2   12.17    1.43
  -8   3   2   12.17    1.02
  -8   3   2   12.09    1.19
  -8   3   2   11.07    1.44
   7  -3  -2    0.78    0.61
   7  -3  -2    1.68    0.58
   7  -3  -2    0.91    0.65
  -7   3   2    0.49    0.66
  -7   3   2    0.47    0.42
  -7   3   2    0.32    0.49
   6  -3  -2   42.82    1.74
   6  -3  -2   42.39    1.69
   6  -3  -2   39.65    1.62
  -6   3   2   41.98    1.47
  -6   3   2   38.69    1.71
  -6   3   2   39.14    1.48
   5  -3  -2    5.89    0.71
   5  -3  -2    6.99    0.66
   5  -3  -2    6.66    0.84
  -5   3   2    6.69    0.64
  -5   3   2    7.64    0.59
   4  -3  -2   85.45    2.23
   4  -3  -2   85.88    2.31
   4  -3  -2   83.23    2.34
  -4   3   2   85.93    2.19
  -4   3   2   87.24    2.33
  -4   3   2   90.87    2.22
   3  -3  -2    1.54    0.38
   3  -3  -2    1.10    0.27
   3  -3  -2    1.22    0.29
  -3   3   2    1.59    0.33
  -3   3   2    1.52    0.30
  -3   3   2    1.71    0.30
   2  -3  -2   53.49    1.27
   2  -3  -2   54.75    1.55
   2  -3  -2   56.69    1.57
  -2   3   2   54.83    1.49
  -2   3   2   54.61    1.47
  -2   3   2   53.77    1.31
   1  -3  -2    9.35    0.57
   1  -3  -2    8.06    0.58
  -1   3   2    8.83    0.52
  -1   3   2    8.44    0.55
  -1   3   2    9.42    0.30
   0  -3  -2    5.89    0.51
   0  -3  -2    5.18    0.20
   0  -3  -2    5.30    0.47
   0   3   2    5.59    0.48
   0   3   2    5.61    0.51
  -1  -3  -2   43.95    1.43
  -1  -3  -2   45.11    1.46
  -1  -3  -2   43.61    1.14
   1   3   2   42.42    1.42
   1   3   2   44.28    1.39
  -2  -3  -2   21.13    1.00
  -2  -3  -2   20.99    0.86
  -2  -3  -2   21.82    1.03
   2   3   2   22.13    1.00
   2   3   2   22.09    1.04
  -3  -3  -2   53.75    1.85
  -3  -3  -2   52.18    1.76
  -3  -3  -2   52.15    1.70
   3   3   2   53.48    1.81
   3   3   2   53.78    1.85
  -4  -3  -2    6.98    0.80
  -4  -3  -2    7.43    0.81
  -4  -3  -2    7.30    0.81
   4   3   2    6.95    0.87
   4   3   2    5.96    0.73
  -5  -3  -2   91.53    2.88
  -5  -3  -2   93.20    2.87
  -5  -3  -2   87.72    2.80
   5   3   2   86.70    2.81
   5   3   2   90.51    2.91
  -6  -3  -2    2.62    0.72
  -6  -3  -2    1.56    0.75
  -6  -3  -2    1.88    0.74
   6   3   2    2.24    0.66
  -7  -3  -2    8.15    1.53
  -7  -3  -2    6.65    1.17
   7   3   2    7.54    1.32
   7   3   2   11.49    1.31
  -8  -3  -2   10.00    1.42
  -8  -3  -2    7.75    1.43
  -8  -3  -2    7.39    1.43
   8   3   2   10.13    1.47
   8   3   2   10.07    1.56
  -9  -3  -2    2.42    1.40
  -9  -3  -2   -0.35    1.30
  -9  -3  -2    1.23    1.27
   9   3   2    0.11    1.10
   9   3   2    0.77    1.42
   9   3   2   -1.14    1.23
 -10  -3  -2    9.18    2.03
 -10  -3  -2   10.44    2.16
 -10  -3  -2   12.11    2.04
  10   3   2    4.92    1.91
  11  -4  -2    8.34    1.93
  11  -4  -2    9.36    1.91
  11  -4  -2   13.04    2.11
 -11   4   2    9.41    2.26
  10  -4  -2    1.00    1.40
  10  -4  -2    2.75    1.25
  10  -4  -2    0.53    1.29
 -10   4   2    0.38    0.75
 -10   4   2    2.18    1.44
 -10   4   2    0.80    0.89
   9  -4  -2   17.71    1.92
   9  -4  -2   22.18    1.99
   9  -4  -2   21.39    1.78
  -9   4   2   20.73    1.28
  -9   4   2   22.93    2.09
  -9   4   2   24.99    1.54
   8  -4  -2    1.16    0.65
   8  -4  -2    1.38    0.81
   8  -4  -2   -1.25    0.83
  -8   4   2   -0.80    0.46
  -8   4   2   -1.09    0.81
   7  -4  -2   36.65    1.85
   7  -4  -2   37.94    1.74
   7  -4  -2   37.03    1.78
  -7   4   2   36.13    1.44
  -7   4   2   36.45    1.37
  -7   4   2   36.91    1.88
   6  -4  -2    0.01    0.44
   6  -4  -2    0.20    0.51
   6  -4  -2   -0.53    0.40
  -6   4   2    0.34    0.39
  -6   4   2    0.36    0.43
  -6   4   2    0.11    0.31
   5  -4  -2   27.27    1.17
   5  -4  -2   25.79    1.20
   5  -4  -2   24.61    1.28
  -5   4   2   25.53    1.22
  -5   4   2   25.50    1.08
  -5   4   2   27.89    1.04
   4  -4  -2   31.87    1.11
   4  -4  -2   31.32    1.24
   4  -4  -2   31.25    1.51
  -4   4   2   31.97    1.18
  -4   4   2   31.29    1.12
  -4   4   2   32.22    1.10
   3  -4  -2   -0.06    0.31
   3  -4  -2   -0.13    0.25
   3  -4  -2    0.19    0.18
  -3   4   2    0.21    0.22
  -3   4   2    0.20    0.16
  -3   4   2    0.27    0.26
   2  -4  -2   60.62    1.80
   2  -4  -2   61.36    1.79
   2  -4  -2   59.26    1.29
  -2   4   2   59.11    1.36
  -2   4   2   64.36    1.72
  -2   4   2   63.66    1.68
   1  -4  -2    2.55    0.43
  -1   4   2    2.89    0.40
  -1   4   2    2.66    0.42
   0  -4  -2  113.78    2.53
   0  -4  -2  132.39    3.18
   0  -4  -2  129.69    3.12
   0   4   2  131.11    3.09
   0   4   2  133.77    3.09
  -1  -4  -2    7.73    0.43
  -1  -4  -2    7.18    0.69
  -1  -4  -2    7.77    0.69
   1   4   2    7.61    0.70
   1   4   2    8.81    0.64
  -2  -4  -2   48.22    1.46
  -2  -4  -2   48.50    1.72
  -2  -4  -2   47.54    1.75
   2   4   2   49.39    1.75
   2   4   2   49.01    1.69
  -3  -4  -2   24.36    1.12
  -3  -4  -2   23.80    1.29
  -3  -4  -2   20.76    1.21
   3   4   2   25.02    1.22
   3   4   2   25.33    1.33
  -4  -4  -2   21.56    1.24
  -4  -4  -2   22.43    1.28
  -4  -4  -2   24.43    1.40
   4   4   2   23.28    1.31
   4   4   2   22.98    1.38
  -5  -4  -2   52.32    2.10
  -5  -4  -2   49.73    2.17
  -5  -4  -2   53.27    2.19
   5   4   2   52.31    2.25
   5   4   2   50.52    2.13
  -6  -4  -2    1.31    0.84
  -6  -4  -2    0.32    0.72
   6   4   2   -0.22    0.70
   6   4   2    1.76    0.88
  -7  -4  -2   37.93    2.19
  -7  -4  -2   35.21    2.17
  -7  -4  -2   36.30    2.24
   7   4   2   37.70    2.13
   7   4   2   33.92    2.26
  -8  -4  -2    0.79    1.23
  -8  -4  -2   -1.09    1.16
  -8  -4  -2    1.84    1.23
   8   4   2    1.81    1.29
   8   4   2    2.55    1.31
   8   4   2    0.72    0.98
  -9  -4  -2   10.16    1.88
  -9  -4  -2   13.28    2.09
  -9  -4  -2   15.36    2.14
   9   4   2   14.95    2.01
   9   4   2   17.37    2.06
   9   4   2   15.99    2.12
 -10  -4  -2    1.20    1.98
 -10  -4  -2    2.34    2.29
 -10  -4  -2    5.26    2.28
  11  -5  -2   11.30    1.99
  11  -5  -2   10.72    1.93
  11  -5  -2   10.54    2.26
 -11   5   2   11.61    2.41
  10  -5  -2    4.54    1.45
  10  -5  -2    2.24    1.34
  10  -5  -2    3.97    1.69
 -10   5   2    3.29    1.55
   9  -5  -2    2.72    1.05
   9  -5  -2    3.03    1.10
   9  -5  -2    2.89    1.26
  -9   5   2    2.08    0.59
  -9   5   2    1.91    0.49
  -9   5   2    2.98    1.13
   8  -5  -2   12.08    1.26
   8  -5  -2   12.13    1.44
   8  -5  -2   13.65    1.64
  -8   5   2   15.16    1.48
  -8   5   2   10.07    0.77
  -8   5   2   11.71    0.93
   7  -5  -2   19.38    1.32
   7  -5  -2   21.73    1.36
   7  -5  -2   18.51    1.42
  -7   5   2   18.85    1.34
  -7   5   2   19.04    0.88
  -7   5   2   18.10    1.01
   6  -5  -2   20.98    1.22
   6  -5  -2   18.14    1.10
   6  -5  -2   20.39    1.31
  -6   5   2   18.79    0.85
  -6   5   2   20.93    1.24
  -6   5   2   19.19    0.95
   5  -5  -2    0.94    0.51
   5  -5  -2    0.65    0.43
   5  -5  -2    0.71    0.38
  -5   5   2    0.64    0.26
  -5   5   2    0.91    0.36
  -5   5   2    1.71    0.40
   4  -5  -2   46.90    1.69
   4  -5  -2   44.78    1.68
   4  -5  -2   47.81    1.35
  -4   5   2   48.07    1.48
  -4   5   2   47.83    1.46
  -4   5   2   48.42    1.42
   3  -5  -2    3.91    0.59
   3  -5  -2    5.15    0.67
   3  -5  -2    4.10    0.29
  -3   5   2    4.46    0.54
  -3   5   2    4.88    0.37
  -3   5   2    4.83    0.47
   2  -5  -2   42.21    1.61
   2  -5  -2   46.00    1.61
  -2   5   2   45.64    1.42
  -2   5   2   46.37    1.46
   1  -5  -2   12.06    0.82
   1  -5  -2   14.64    0.90
  -1   5   2   11.15    0.71
  -1   5   2   11.50    0.77
   0  -5  -2   -0.23    0.33
   0  -5  -2    1.23    0.41
   0   5   2    0.73    0.38
   0   5   2    0.61    0.31
  -1  -5  -2    9.81    0.49
  -1  -5  -2    9.18    0.85
  -1  -5  -2   10.55    0.86
   1   5   2    8.89    0.80
  -2  -5  -2   -0.68    0.38
  -2  -5  -2    1.37    0.51
  -2  -5  -2    0.04    0.26
   2   5   2   -0.21    0.35
   2   5   2   -0.21    0.43
  -3  -5  -2   52.61    1.80
  -3  -5  -2   55.88    2.17
  -3  -5  -2   54.81    2.13
   3   5   2   55.96    2.06
   3   5   2   58.06    2.16
  -4  -5  -2    1.03    0.66
  -4  -5  -2    0.66    0.62
  -4  -5  -2    0.32    0.52
   4   5   2    0.01    0.57
   4   5   2   -0.26    0.57
  -5  -5  -2   13.95    1.25
  -5  -5  -2   12.37    1.37
   5   5   2   12.86    1.32
   5   5   2   12.23    1.47
  -6  -5  -2    5.28    1.10
  -6  -5  -2    4.80    1.13
  -6  -5  -2    7.13    1.16
   6   5   2    4.67    1.20
   6   5   2    5.33    1.04
  -7  -5  -2   15.04    1.78
  -7  -5  -2   19.31    1.92
  -7  -5  -2   15.87    1.85
   7   5   2   12.74    1.62
   7   5   2   14.40    1.72
   7   5   2   12.28    1.69
  -8  -5  -2   17.43    2.10
  -8  -5  -2   14.71    2.00
  -8  -5  -2   11.36    1.88
   8   5   2   14.45    1.97
   8   5   2   17.14    2.10
   8   5   2   13.26    1.92
  -9  -5  -2    1.50    1.78
  -9  -5  -2    0.17    1.78
  -9  -5  -2    0.45    1.81
   9   5   2    1.02    1.80
   9   5   2   -2.38    1.67
  10  -6  -2   -0.14    1.29
  10  -6  -2    0.15    1.25
  10  -6  -2    4.36    1.65
 -10   6   2    4.92    1.68
   9  -6  -2   29.69    2.13
   9  -6  -2   25.31    2.04
   9  -6  -2   25.07    2.27
  -9   6   2   21.50    1.98
   8  -6  -2    4.68    1.15
   8  -6  -2    5.19    0.98
   8  -6  -2    4.42    1.13
  -8   6   2    3.88    0.96
   7  -6  -2   21.70    1.55
   7  -6  -2   23.64    1.86
   7  -6  -2   21.82    1.38
  -7   6   2   22.01    0.69
  -7   6   2   21.83    1.51
  -7   6   2   22.37    0.75
   6  -6  -2    2.77    0.58
   6  -6  -2    2.23    0.69
   6  -6  -2    2.93    0.85
  -6   6   2    3.41    0.60
  -6   6   2    3.06    0.40
  -6   6   2    2.91    0.35
   5  -6  -2   10.30    0.95
   5  -6  -2    9.42    1.04
   5  -6  -2   10.73    0.71
  -5   6   2   10.69    0.79
  -5   6   2   11.37    0.69
  -5   6   2   10.04    0.59
   4  -6  -2    8.45    0.45
   4  -6  -2    8.83    0.87
   4  -6  -2   10.24    0.94
  -4   6   2    8.96    0.57
  -4   6   2    8.85    0.59
  -4   6   2    7.97    0.65
   3  -6  -2    6.39    0.78
   3  -6  -2    5.50    0.76
  -3   6   2    4.87    0.61
  -3   6   2    6.02    0.52
   2  -6  -2   70.60    2.25
  -2   6   2   68.75    2.01
  -2   6   2   70.40    1.97
   1  -6  -2    0.50    0.42
   1  -6  -2    0.72    0.44
  -1   6   2    0.27    0.33
  -1   6   2    0.44    0.39
   0  -6  -2   24.19    1.28
   0  -6  -2   23.69    1.30
   0   6   2   23.16    1.19
   0   6   2   27.13    1.23
   0   6   2   25.31    0.74
  -1  -6  -2   -0.04    0.18
  -1  -6  -2    0.19    0.48
  -1  -6  -2    0.30    0.53
   1   6   2    0.08    0.28
   1   6   2   -0.80    0.45
   1   6   2   -0.41    0.40
  -2  -6  -2   16.55    1.26
  -2  -6  -2   15.20    0.81
  -2  -6  -2   15.09    1.25
   2   6   2   16.34    1.25
   2   6   2   15.68    1.15
  -3  -6  -2    0.99    0.44
  -3  -6  -2   -0.39    0.67
   3   6   2    0.43    0.56
   3   6   2    0.33    0.63
  -4  -6  -2    0.48    0.55
  -4  -6  -2    0.10    0.71
   4   6   2   -0.40    0.74
   4   6   2   -0.17    0.66
  -5  -6  -2   20.36    1.78
  -5  -6  -2   18.67    1.74
  -5  -6  -2   19.11    1.40
   5   6   2   16.97    1.53
   5   6   2   17.66    1.68
   5   6   2   16.31    1.55
  -6  -6  -2    1.89    1.08
  -6  -6  -2    2.70    1.02
  -6  -6  -2    2.76    1.08
   6   6   2    3.29    1.03
   6   6   2    1.07    1.05
   6   6   2    2.24    1.22
  -7  -6  -2   31.29    2.31
  -7  -6  -2   25.29    2.41
  -7  -6  -2   26.19    2.61
   7   6   2   28.46    2.50
   7   6   2   27.94    2.36
   7   6   2   20.53    2.23
  -8  -6  -2    5.19    1.87
  -8  -6  -2    2.99    1.79
  -8  -6  -2    8.65    1.73
   8   6   2    4.86    1.80
   8   6   2    9.56    2.13
   8   6   2    5.46    1.65
  -9  -6  -2   12.78    2.51
  10  -7  -2    5.07    1.47
  10  -7  -2    1.74    1.76
  10  -7  -2    4.28    1.68
 -10   7   2    3.34    1.78
   9  -7  -2    3.56    1.28
   9  -7  -2    1.61    1.11
   9  -7  -2    3.36    1.37
  -9   7   2    2.88    1.28
   8  -7  -2   12.25    1.55
   8  -7  -2   14.93    1.70
   8  -7  -2   10.98    1.32
  -8   7   2   11.60    1.48
   7  -7  -2    0.08    0.94
   7  -7  -2   -0.39    0.72
   7  -7  -2    0.33    0.55
  -7   7   2    0.46    0.64
   6  -7  -2   28.44    1.57
   6  -7  -2   28.94    1.77
   6  -7  -2   26.84    1.13
  -6   7   2   28.18    1.34
   5  -7  -2    2.19    0.68
   5  -7  -2    1.57    0.29
   5  -7  -2   -0.08    0.66
  -5   7   2    1.16    0.27
  -5   7   2    1.27    0.24
   4  -7  -2   67.91    2.33
   4  -7  -2   64.36    2.38
  -4   7   2   66.55    1.77
  -4   7   2   67.13    1.74
   3  -7  -2    0.52    0.48
   3  -7  -2    0.10    0.57
  -3   7   2    0.50    0.31
  -3   7   2    0.09    0.38
   2  -7  -2    7.43    0.92
   2  -7  -2    7.40    0.91
  -2   7   2    7.55    0.68
  -2   7   2    5.79    0.70
   1  -7  -2   11.57    1.03
   1  -7  -2    8.45    1.03
  -1   7   2    8.34    0.89
  -1   7   2    8.90    0.81
   0  -7  -2    2.28    0.68
   0  -7  -2    2.79    0.68
   0   7   2    1.98    0.68
   0   7   2    2.37    0.26
   0   7   2    2.70    0.61
   0   7   2    2.28    0.20
  -1  -7  -2   13.31    1.29
  -1  -7  -2   17.56    1.38
  -1  -7  -2   15.48    0.58
   1   7   2   12.66    1.07
   1   7   2   16.36    0.82
   1   7   2   17.78    1.28
  -2  -7  -2    0.28    0.65
  -2  -7  -2    1.30    0.35
  -2  -7  -2    0.78    0.68
   2   7   2    1.14    0.50
   2   7   2    1.56    0.72
  -3  -7  -2   59.05    2.58
  -3  -7  -2   59.74    1.93
  -3  -7  -2   55.43    2.48
   3   7   2   55.97    2.05
   3   7   2   57.94    2.38
   3   7   2   48.01    2.79
  -4  -7  -2    0.42    0.59
  -4  -7  -2    0.73    0.93
  -4  -7  -2   -0.86    0.88
   4   7   2    0.15    0.80
   4   7   2    0.20    0.94
   4   7   2    0.37    0.82
  -5  -7  -2   10.41    1.19
  -5  -7  -2   16.43    1.89
  -5  -7  -2    9.99    1.53
   5   7   2   11.05    1.53
   5   7   2   10.96    1.49
   5   7   2   10.90    1.54
  -6  -7  -2    6.29    1.59
  -6  -7  -2    5.79    1.41
  -6  -7  -2    7.28    1.52
   6   7   2    6.89    1.48
   6   7   2    5.64    1.55
   6   7   2    5.59    1.50
  -7  -7  -2    4.71    1.52
  -7  -7  -2    5.31    1.79
  -7  -7  -2    5.38    1.80
   7   7   2    2.48    1.41
   7   7   2    3.99    1.76
   7   7   2    5.96    1.89
  -8  -7  -2    3.78    2.06
   8   7   2    4.52    2.10
   8   7   2    2.03    2.56
   9  -8  -2   27.85    2.49
   9  -8  -2   22.81    1.81
   9  -8  -2   24.53    2.81
  -9   8   2   29.68    2.38
   8  -8  -2   -0.15    1.08
   8  -8  -2    1.61    1.33
   8  -8  -2   -0.01    0.70
  -8   8   2   -0.05    0.93
   7  -8  -2    3.09    1.06
   7  -8  -2    4.72    1.26
   7  -8  -2    6.03    0.76
  -7   8   2    4.44    0.84
   6  -8  -2    0.89    1.00
   6  -8  -2    1.57    0.87
   5  -8  -2    2.58    0.80
   4  -8  -2    6.70    0.98
   4  -8  -2    6.19    1.08
  -4   8   2    5.50    0.55
  -4   8   2    5.67    0.47
   3  -8  -2    0.63    0.74
  -3   8   2    2.36    0.39
  -3   8   2    1.44    0.48
   2  -8  -2   20.74    1.50
   2  -8  -2   19.03    1.43
  -2   8   2   22.40    1.12
  -2   8   2   16.43    1.66
   1  -8  -2   -0.16    0.62
  -1   8   2    0.40    0.46
  -1   8   2    0.25    0.57
   0  -8  -2   45.57    2.16
   0  -8  -2   43.89    2.10
   0   8   2   42.60    1.92
   0   8   2   43.41    1.84
  -1  -8  -2    0.10    0.80
   1   8   2    2.92    0.79
   1   8   2    1.53    0.42
   1   8   2    1.83    0.80
  -2  -8  -2    4.75    1.11
  -2  -8  -2    3.44    1.08
  -2  -8  -2    4.79    0.56
   2   8   2    6.44    1.01
   2   8   2    5.05    0.97
  -3  -8  -2    5.22    1.24
  -3  -8  -2    2.80    1.16
  -3  -8  -2    4.73    0.68
   3   8   2    5.59    1.15
   3   8   2    3.76    0.84
  -4  -8  -2    0.07    1.18
  -4  -8  -2    1.18    1.17
  -4  -8  -2    0.45    0.65
   4   8   2    2.17    1.17
   4   8   2    1.34    0.92
   4   8   2    0.65    1.16
  -5  -8  -2   33.84    2.61
  -5  -8  -2   32.67    1.99
  -5  -8  -2   31.97    2.63
   5   8   2   32.64    2.42
   5   8   2   35.70    2.61
   5   8   2   30.51    2.59
  -6  -8  -2    3.23    1.99
  -6  -8  -2    2.63    1.30
  -6  -8  -2    1.89    1.71
   6   8   2    0.67    1.69
   6   8   2    0.88    1.60
   6   8   2    3.13    1.62
  -7  -8  -2   14.78    2.01
   7   8   2    8.23    2.48
   7   8   2   11.45    2.17
   8  -9  -2   21.62    2.14
   8  -9  -2   19.50    2.33
   7  -9  -2    0.83    1.13
   7  -9  -2    0.14    1.38
   6  -9  -2   15.08    1.71
   6  -9  -2   16.81    1.72
   5  -9  -2    0.68    1.05
   4  -9  -2   41.63    2.68
   3  -9  -2   -0.30    0.77
   3  -9  -2   -0.85    0.83
  -3   9   2    0.54    0.40
  -3   9   2    0.28    0.46
   2  -9  -2   18.24    1.68
  -2   9   2   15.11    1.01
   1  -9  -2   12.54    1.50
   1  -9  -2   10.72    1.42
  -1   9   2   11.14    1.27
  -1   9   2   10.40    1.06
   0  -9  -2    1.42    0.99
   0  -9  -2    2.03    0.99
   0   9   2    1.04    0.68
   0   9   2    1.17    0.87
  -1  -9  -2   30.98    2.14
  -1  -9  -2   33.81    2.31
   1   9   2   31.77    0.96
   1   9   2   29.93    1.78
   1   9   2   29.06    0.89
   1   9   2   32.90    2.09
  -2  -9  -2   -0.17    0.30
  -2  -9  -2    0.64    1.22
  -2  -9  -2    0.90    1.11
   2   9   2    0.84    1.09
   2   9   2   -0.94    0.99
   2   9   2    0.83    0.68
  -3  -9  -2   23.97    2.36
  -3  -9  -2   25.28    2.43
  -3  -9  -2   27.64    1.27
   3   9   2   24.44    2.40
   3   9   2   24.51    1.67
   3   9   2   23.21    2.02
  -4  -9  -2    0.84    0.81
  -4  -9  -2   -0.40    1.40
  -4  -9  -2    1.06    1.43
   4   9   2    1.54    1.57
   4   9   2   -2.19    1.11
  -5  -9  -2   29.15    3.28
   5   9   2   32.03    3.06
   5   9   2   30.31    2.59
   5   9   2   26.29    2.87
  -6  -9  -2    1.64    1.42
   6   9   2    2.36    2.44
   6   9   2    2.94    1.91
   7 -10  -2    9.89    1.80
   7 -10  -2    4.88    1.50
   6 -10  -2    1.56    1.41
   6 -10  -2    0.46    1.20
   5 -10  -2    3.93    1.21
   4 -10  -2    9.60    1.52
   4 -10  -2    9.93    1.48
   3 -10  -2   13.55    1.57
   3 -10  -2   14.71    1.68
   2 -10  -2   12.00    1.50
   2 -10  -2   14.02    1.74
  -2  10   2   12.21    1.19
  -2  10   2   12.27    1.01
   1 -10  -2    0.64    1.10
   1 -10  -2    2.12    1.19
  -1  10   2   -0.35    0.72
  -1  10   2   -0.04    0.86
   0 -10  -2    6.87    1.45
   0 -10  -2   11.08    1.56
   0  10   2    5.51    1.05
   0  10   2    7.14    1.26
  -1 -10  -2   -0.86    1.33
  -1 -10  -2    0.08    1.25
   1  10   2    1.08    1.23
  -2 -10  -2    1.01    1.46
  -2 -10  -2    2.42    1.43
   2  10   2    2.09    1.49
   2  10   2    0.14    1.19
   2  10   2    0.67    0.59
  -3 -10  -2    1.57    0.50
  -3 -10  -2    1.79    1.73
  -3 -10  -2    2.18    2.19
   3  10   2   -0.48    1.68
   3  10   2    1.37    1.37
   3  10   2    2.22    0.92
  -4 -10  -2    0.50    2.13
  -4 -10  -2    0.52    0.93
   4  10   2    1.61    1.37
   4  10   2   -0.24    1.75
   4  10   2   -1.32    1.78
   5 -11  -2    1.12    1.49
   5 -11  -2    1.03    1.74
   4 -11  -2   37.02    2.65
   4 -11  -2   30.69    2.82
   3 -11  -2    3.71    1.47
   3 -11  -2    1.69    1.51
   2 -11  -2    2.80    1.45
   2 -11  -2   -0.84    1.49
  -2  11   2    0.51    0.53
  -2  11   2    0.28    0.47
   1 -11  -2   11.04    1.97
   1 -11  -2   12.44    1.90
  -1  11   2    8.65    1.14
  -1  11   2    8.09    1.01
   0 -11  -2    3.27    1.55
   0 -11  -2    4.58    1.64
   0  11   2    4.03    1.19
   0  11   2    0.46    1.17
  -1 -11  -2   25.91    3.09
   1  11   2   22.32    2.30
   1  11   2   16.70    1.87
  -2 -11  -2    3.08    2.20
   2  11   2    0.30    1.60
   2  11   2    0.25    1.66
   0 -12   3   -1.63    1.70
   0 -12   3    1.31    1.95
   1 -12   3    4.61    1.93
   1 -12   3    4.39    1.70
   2 -12   3    6.55    1.72
   2 -12   3    7.23    1.76
   3 -12   3    3.56    1.62
   3 -12   3    2.50    1.57
   3  11  -3   -2.31    1.38
   3  11  -3   -1.51    1.46
  -3 -11   3   -2.03    2.03
  -3 -11   3    0.38    1.12
   2  11  -3    4.66    1.13
   2  11  -3    5.60    1.23
  -2 -11   3    7.69    1.91
  -2 -11   3    4.79    1.97
   1  11  -3   -0.26    0.69
   1  11  -3    0.68    0.69
  -1 -11   3    0.58    1.50
  -1 -11   3    0.12    0.52
  -1 -11   3   -0.40    1.44
   0 -11   3   18.60    2.14
   0 -11   3   20.82    2.37
   1 -11   3    7.05    1.50
   1 -11   3    3.67    1.42
   2 -11   3   28.15    2.17
   2 -11   3   29.69    2.21
   3 -11   3   -0.57    1.06
   3 -11   3    1.44    1.20
   4 -11   3    7.09    1.27
   4 -11   3    7.01    1.36
   5 -11   3    2.29    1.18
   5 -11   3    1.04    1.17
   6 -11   3    3.53    1.26
   5  10  -3    8.53    1.78
   5  10  -3   12.72    2.28
  -5 -10   3   11.08    2.56
   4  10  -3    5.63    1.69
  -4 -10   3    1.18    1.96
  -4 -10   3    3.94    1.77
   3  10  -3   13.47    1.77
   3  10  -3   16.92    1.70
  -3 -10   3   12.59    1.93
  -3 -10   3   18.74    2.20
   2  10  -3   -0.29    0.84
   2  10  -3    2.88    1.07
  -2 -10   3    0.26    1.21
  -2 -10   3    0.95    1.36
   1  10  -3   25.56    1.37
   1  10  -3   23.64    1.64
   1  10  -3   24.58    0.85
  -1 -10   3   25.32    2.07
  -1 -10   3   26.97    2.08
   0  10  -3    1.17    0.37
   0  10  -3    1.18    0.35
   0 -10   3    1.44    1.07
   0 -10   3    1.91    0.49
   0 -10   3    1.55    1.04
   1 -10   3    1.60    1.04
   1 -10   3    4.40    0.50
   1 -10   3    5.07    1.24
   2 -10   3    8.42    1.14
   2 -10   3    7.27    1.05
   3 -10   3   -1.05    0.78
   4 -10   3    9.89    1.15
   5 -10   3    2.72    0.92
   6 -10   3   21.13    1.70
   6 -10   3   19.90    1.80
   7 -10   3    0.20    1.12
   7 -10   3    0.97    1.07
   8 -10   3    2.03    1.29
   8 -10   3    3.03    1.37
   6   9  -3    0.52    1.66
   6   9  -3    2.16    2.01
   6   9  -3   -0.10    1.70
  -6  -9   3    3.16    2.03
   5   9  -3   23.36    2.44
   5   9  -3   25.07    2.79
   5   9  -3   25.61    2.49
  -5  -9   3   26.43    2.77
  -5  -9   3   16.98    2.17
   4   9  -3    3.30    1.12
   4   9  -3    3.03    1.26
   4   9  -3    2.49    1.19
  -4  -9   3    3.39    1.43
  -4  -9   3    3.33    1.40
   3   9  -3    7.36    1.33
   3   9  -3    7.25    1.10
  -3  -9   3    5.77    1.37
  -3  -9   3    9.14    1.51
   2   9  -3   19.76    1.22
   2   9  -3   16.97    1.58
   2   9  -3   19.42    1.38
  -2  -9   3   18.68    1.87
  -2  -9   3   20.21    1.76
   1   9  -3   14.51    1.04
   1   9  -3   11.64    0.82
   1   9  -3   12.62    1.17
  -1  -9   3   12.53    1.58
   0  -9   3   34.55    1.90
   0  -9   3   35.13    1.89
   1  -9   3    1.88    0.75
   1  -9   3    0.29    0.39
   1  -9   3    1.16    0.71
   2  -9   3   63.96    2.33
   2  -9   3   63.03    1.81
   2  -9   3   67.49    2.41
   3  -9   3    3.27    0.79
   3  -9   3    4.59    0.64
   3  -9   3    5.13    0.86
   4  -9   3   14.29    1.13
   5  -9   3    6.80    0.92
   5  -9   3    7.80    0.94
   6  -9   3    2.66    0.91
   6  -9   3    3.16    0.78
   7  -9   3    9.48    0.78
   7  -9   3   11.00    1.38
   7  -9   3    9.63    0.66
   7  -9   3    8.99    1.77
   8  -9   3    0.02    0.63
   8  -9   3   -0.83    1.12
   8  -9   3   -0.11    0.93
   9  -9   3   22.77    2.17
   9  -9   3   22.16    2.27
   7   8  -3    5.26    1.98
   7   8  -3    6.68    2.01
   7   8  -3    5.06    1.81
  -7  -8   3    4.57    2.18
   6   8  -3    0.44    1.35
   6   8  -3   -2.17    1.26
   6   8  -3    1.50    1.56
  -6  -8   3   -0.10    1.41
  -6  -8   3   -0.61    1.56
   5   8  -3   23.40    2.10
   5   8  -3   20.38    1.89
   5   8  -3   21.30    2.03
  -5  -8   3   14.86    1.94
  -5  -8   3   21.18    2.32
   4   8  -3    6.95    1.21
   4   8  -3    6.99    1.41
   4   8  -3    9.02    1.34
  -4  -8   3    7.43    1.38
  -4  -8   3    7.00    1.39
   3   8  -3    2.22    0.82
   3   8  -3    2.14    0.77
   3   8  -3    2.17    0.90
  -3  -8   3    3.34    1.05
  -3  -8   3    1.89    0.94
   2   8  -3    2.11    0.62
   2   8  -3    2.60    0.76
  -2  -8   3    2.50    0.86
  -2  -8   3    2.10    0.85
   1   8  -3   15.96    1.00
   1   8  -3   16.29    1.22
   1   8  -3   15.10    0.91
  -1  -8   3   18.63    1.44
  -1  -8   3   14.66    1.33
   0   8  -3    0.48    0.24
   0   8  -3    0.45    0.38
   0   8  -3    0.61    0.31
   0  -8   3    0.61    0.60
   0  -8   3    0.97    0.59
   1  -8   3    0.58    0.54
   1  -8   3    0.99    0.58
   1  -8   3    0.87    0.41
   2  -8   3    7.76    0.86
   2  -8   3    7.62    0.73
   2  -8   3    7.13    0.84
   3  -8   3    0.19    0.43
   3  -8   3    0.01    0.43
   4  -8   3   11.89    0.92
   4  -8   3   10.66    0.98
   5  -8   3    2.93    0.37
   5  -8   3    4.16    0.67
   5  -8   3    3.16    0.71
   5  -8   3    3.44    0.31
   6  -8   3   16.49    1.29
   6  -8   3   19.70    0.98
   6  -8   3   17.46    1.19
   6  -8   3   18.31    0.86
   7  -8   3    1.01    0.64
   7  -8   3    0.04    0.77
   7  -8   3    0.05    0.58
   8  -8   3    5.70    1.00
   8  -8   3    5.45    0.96
  -9   8  -3    4.43    1.60
   9  -8   3    7.39    1.35
   9  -8   3    3.75    1.16
   8   7  -3   -3.59    1.86
   8   7  -3   -2.32    1.71
   8   7  -3    9.00    3.47
  -8  -7   3   -0.21    2.14
  -8  -7   3   -3.40    1.83
   7   7  -3   31.17    2.75
   7   7  -3   24.82    2.50
   7   7  -3   24.53    2.51
  -7  -7   3   26.89    2.57
  -7  -7   3   20.85    2.54
   6   7  -3   -0.80    1.01
   6   7  -3   -1.91    1.07
   6   7  -3    2.07    1.21
  -6  -7   3    2.06    1.28
  -6  -7   3   -1.97    1.15
   5   7  -3   17.69    1.77
   5   7  -3   18.15    1.64
   5   7  -3   14.75    1.60
  -5  -7   3   15.85    1.84
  -5  -7   3   18.50    1.84
   4   7  -3    0.31    0.69
   4   7  -3    0.51    0.89
   4   7  -3   -1.38    0.74
  -4  -7   3   -0.56    0.75
  -4  -7   3   -0.43    0.83
   3   7  -3    7.86    0.98
   3   7  -3    7.94    1.06
   3   7  -3    8.38    1.04
  -3  -7   3    8.01    1.12
  -3  -7   3    9.17    1.23
   2   7  -3   42.62    1.78
   2   7  -3   43.22    1.68
  -2  -7   3   43.26    1.93
  -2  -7   3   43.01    1.98
   1   7  -3    0.15    0.36
   1   7  -3    0.04    0.46
   1   7  -3    0.12    0.35
  -1  -7   3    0.58    0.53
  -1  -7   3    0.38    0.55
   0   7  -3  104.03    2.53
   0   7  -3  103.44    2.34
   0   7  -3  108.67    2.53
   0  -7   3  108.12    2.98
   0  -7   3  107.21    3.01
   1  -7   3    0.14    0.37
   1  -7   3    0.06    0.32
   1  -7   3    0.08    0.39
   2  -7   3   47.56    1.65
   2  -7   3   45.87    1.49
   2  -7   3   45.78    1.59
   3  -7   3    3.83    0.52
   3  -7   3    3.84    0.58
   3  -7   3    3.94    0.57
   4  -7   3   31.23    1.22
   4  -7   3   27.92    1.71
   4  -7   3   29.08    1.39
   4  -7   3   26.95    0.81
   5  -7   3    9.94    0.63
   5  -7   3   12.55    0.91
   5  -7   3   10.45    0.79
   6  -7   3    1.75    0.57
   6  -7   3    1.16    0.47
  -7   7  -3   22.18    1.52
   7  -7   3   22.90    1.28
   7  -7   3   24.01    1.47
   7  -7   3   21.52    1.37
  -8   7  -3   -1.33    0.90
   8  -7   3    0.91    0.71
   8  -7   3    0.69    0.85
   8  -7   3    0.40    0.83
  -9   7  -3   21.85    2.24
   9  -7   3   20.86    1.69
   9  -7   3   22.51    2.02
   9  -7   3   21.02    1.94
 -10   7  -3   -0.42    1.74
  10  -7   3    0.12    1.50
  10  -7   3   -0.50    1.36
  10  -7   3   -0.37    1.17
   9   6  -3    2.33    2.12
  -9  -6   3    3.88    2.25
  -9  -6   3   -0.64    2.41
   8   6  -3    7.35    1.77
   8   6  -3   10.09    1.62
   8   6  -3    9.09    1.79
  -8  -6   3    4.60    1.72
  -8  -6   3    7.17    1.81
   7   6  -3    4.83    1.40
   7   6  -3    3.62    1.33
   7   6  -3    2.81    1.23
  -7  -6   3    4.44    1.38
  -7  -6   3    3.34    1.25
   6   6  -3    1.92    0.96
   6   6  -3    2.24    0.93
   6   6  -3    1.43    1.05
  -6  -6   3    1.20    0.97
  -6  -6   3   -0.17    0.98
   5   6  -3    3.06    1.04
   5   6  -3    5.08    0.98
   5   6  -3    6.09    1.06
  -5  -6   3    5.39    1.12
  -5  -6   3    6.71    1.09
   4   6  -3    3.63    0.80
   4   6  -3    3.85    0.80
   4   6  -3    5.22    0.98
  -4  -6   3    4.40    0.93
  -4  -6   3    2.69    0.82
   3   6  -3   29.99    1.41
   3   6  -3   28.51    1.49
   3   6  -3   27.87    1.37
  -3  -6   3   29.00    1.58
  -3  -6   3   30.77    1.63
   2   6  -3    0.76    0.48
   2   6  -3    1.55    0.45
   2   6  -3    0.92    0.41
  -2  -6   3    1.39    0.53
  -2  -6   3    0.78    0.53
   1   6  -3   27.90    1.07
   1   6  -3   28.25    1.19
  -1  -6   3   27.04    1.30
  -1  -6   3   28.65    1.33
   0   6  -3    1.27    0.33
   0   6  -3    1.27    0.26
   0   6  -3    1.44    0.28
   0  -6   3    1.58    0.46
   0  -6   3    1.60    0.42
   1  -6   3   -0.13    0.29
   1  -6   3    0.09    0.28
   2  -6   3    7.98    0.31
   2  -6   3    7.81    0.65
   2  -6   3    8.59    0.61
   3  -6   3    5.78    0.56
   3  -6   3    6.93    0.55
   3  -6   3    6.09    0.36
   3  -6   3    6.15    0.67
   4  -6   3   11.51    0.72
   4  -6   3   13.54    0.98
   4  -6   3   11.39    0.73
  -5   6  -3   26.99    1.36
   5  -6   3   25.32    1.13
   5  -6   3   27.57    1.10
  -6   6  -3    8.62    1.05
   6  -6   3    8.29    0.88
   6  -6   3    8.95    0.77
  -7   6  -3    0.99    0.71
   7  -6   3   -0.48    0.58
   7  -6   3    0.18    0.52
  -8   6  -3   -0.78    0.85
   8  -6   3    0.93    0.62
   8  -6   3   -0.34    0.77
  -9   6  -3    2.52    1.22
   9  -6   3    1.21    1.01
   9  -6   3   -0.64    0.84
   9  -6   3    1.22    1.08
 -10   6  -3   -1.83    1.54
  10  -6   3   -0.93    1.36
  10  -6   3    1.90    1.51
  10  -6   3    0.44    1.04
   9   5  -3   16.94    2.34
   9   5  -3   14.44    2.15
   9   5  -3   14.48    2.13
  -9  -5   3   17.69    2.25
  -9  -5   3   18.57    2.46
  -9  -5   3   19.06    2.47
   8   5  -3    1.69    1.48
   8   5  -3    0.96    1.24
   8   5  -3    1.08    1.27
  -8  -5   3   -1.23    1.29
  -8  -5   3    0.66    1.33
   7   5  -3   43.01    2.43
   7   5  -3   44.32    2.54
   7   5  -3   40.33    2.36
  -7  -5   3   44.62    2.52
  -7  -5   3   46.79    2.57
   6   5  -3    0.95    0.90
   6   5  -3    1.56    0.91
   6   5  -3   -0.55    0.70
  -6  -5   3    2.22    0.91
  -6  -5   3    0.00    0.72
   5   5  -3   32.87    1.74
   5   5  -3   30.82    1.85
   5   5  -3   33.79    1.73
  -5  -5   3   34.90    1.85
  -5  -5   3   32.73    1.85
   4   5  -3    9.37    0.95
   4   5  -3    7.43    0.94
   4   5  -3    8.98    1.08
  -4  -5   3    7.21    0.99
  -4  -5   3    8.25    1.06
   3   5  -3    9.13    0.79
   3   5  -3    7.08    0.84
   3   5  -3    7.15    0.76
  -3  -5   3    9.17    0.92
  -3  -5   3    7.48    0.85
   2   5  -3  163.16    3.85
   2   5  -3  166.47    3.81
  -2  -5   3  165.64    4.05
  -2  -5   3  157.58    3.96
   1   5  -3    0.78    0.34
   1   5  -3    0.65    0.30
   1   5  -3    0.51    0.25
  -1  -5   3    0.77    0.35
  -1  -5   3    0.83    0.66
   0   5  -3   91.41    2.12
   0   5  -3   96.81    2.13
   0  -5   3   92.14    2.38
   0  -5   3   91.94    2.36
   1  -5   3    0.00    0.18
   1  -5   3    0.12    0.24
   1  -5   3    0.02    0.11
   2  -5   3   54.31    1.44
   2  -5   3   55.39    1.61
   2  -5   3   55.08    1.29
   2  -5   3   54.01    1.44
   3  -5   3    7.98    0.47
   3  -5   3    7.09    0.67
   3  -5   3    7.37    0.46
   3  -5   3    7.12    0.48
  -4   5  -3   30.69    1.32
   4  -5   3   31.53    1.04
   4  -5   3   31.38    1.06
   4  -5   3   34.57    1.65
  -5   5  -3   25.89    1.34
   5  -5   3   26.58    1.02
   5  -5   3   25.45    1.09
  -6   5  -3    5.28    0.82
   6  -5   3    5.38    0.68
   6  -5   3    6.71    0.65
  -7   5  -3   49.10    2.19
   7  -5   3   51.90    1.83
   7  -5   3   47.95    1.90
  -8   5  -3    1.75    0.95
   8  -5   3    0.55    0.77
   8  -5   3    0.50    0.59
  -9   5  -3   20.78    2.08
   9  -5   3   23.32    1.60
   9  -5   3   23.74    1.90
 -10   5  -3   -0.86    1.53
  10  -5   3   -0.80    1.28
  10  -5   3    1.04    1.08
  10  -5   3   -1.82    1.21
 -11   5  -3   19.47    2.93
  11  -5   3   19.91    2.35
  11  -5   3   15.10    2.23
  11  -5   3   14.91    2.36
  10   4  -3    4.12    2.20
 -10  -4   3    5.84    2.39
 -10  -4   3    2.48    2.18
   9   4  -3    0.29    1.51
   9   4  -3   -0.83    1.47
   9   4  -3    2.49    1.38
  -9  -4   3   -0.74    1.35
  -9  -4   3   -0.93    1.40
   8   4  -3    0.57    1.22
   8   4  -3    0.78    1.23
   8   4  -3    1.43    1.07
  -8  -4   3    1.65    1.20
  -8  -4   3   -0.72    1.03
   7   4  -3    7.86    1.21
   7   4  -3    7.70    1.26
   7   4  -3    7.80    1.24
  -7  -4   3    8.47    1.25
  -7  -4   3    5.73    1.28
   6   4  -3    0.55    0.82
   6   4  -3    1.53    0.74
  -6  -4   3    1.16    0.70
  -6  -4   3    2.25    0.83
   5   4  -3    1.56    0.66
   5   4  -3    2.76    0.70
   5   4  -3    1.97    0.64
  -5  -4   3    1.33    0.61
  -5  -4   3    2.05    0.72
   4   4  -3   18.90    1.23
   4   4  -3   17.66    1.16
   4   4  -3   19.07    1.12
  -4  -4   3   18.95    1.21
  -4  -4   3   17.88    1.20
   3   4  -3   54.35    1.89
   3   4  -3   54.83    1.84
   3   4  -3   55.64    1.84
  -3  -4   3   57.08    1.94
  -3  -4   3   58.69    1.99
   2   4  -3    4.24    0.48
   2   4  -3    4.76    0.59
   2   4  -3    4.57    0.54
  -2  -4   3    3.43    0.63
  -2  -4   3    3.86    0.57
   1   4  -3    3.89    0.39
   1   4  -3    3.45    0.44
   1   4  -3    4.28    0.44
  -1  -4   3    3.28    0.45
  -1  -4   3    3.21    0.44
   0   4  -3    0.59    0.20
   0   4  -3    0.99    0.22
   0   4  -3    0.65    0.17
   0  -4   3    1.05    0.27
   0  -4   3    0.92    0.24
   0  -4   3    0.74    0.19
   1  -4   3   -0.11    0.14
   1  -4   3   -0.18    0.10
   2  -4   3   35.64    1.19
   2  -4   3   35.33    0.90
   2  -4   3   34.96    0.97
   2  -4   3   35.08    0.89
  -3   4  -3    6.84    0.57
   3  -4   3    6.74    0.60
   3  -4   3    7.06    0.39
   3  -4   3    7.07    0.36
  -4   4  -3   45.47    1.59
   4  -4   3   44.22    1.27
   4  -4   3   46.06    1.25
  -5   4  -3    9.04    0.91
   5  -4   3   10.84    0.64
   5  -4   3   11.52    0.72
  -6   4  -3   16.33    1.16
   6  -4   3   14.61    1.12
   6  -4   3   14.87    0.88
  -7   4  -3    1.11    0.75
   7  -4   3    0.57    0.57
   7  -4   3    1.34    0.51
  -8   4  -3    2.45    0.93
   8  -4   3    2.22    0.82
   8  -4   3    1.50    0.64
 -10   4  -3    0.72    1.44
  10  -4   3    3.86    1.38
  10  -4   3    4.75    1.20
  10  -4   3    0.81    1.44
 -11   4  -3    5.92    2.33
  11  -4   3    2.45    1.60
  11  -4   3    4.96    1.88
  11  -4   3    3.79    1.92
  10   3  -3   -2.86    1.39
 -10  -3   3    2.57    1.74
 -10  -3   3    4.09    1.97
 -10  -3   3    0.65    1.54
   9   3  -3   20.98    2.13
   9   3  -3   18.27    2.33
   9   3  -3   20.24    2.44
  -9  -3   3   17.85    2.02
  -9  -3   3   22.96    2.21
   8   3  -3    0.60    0.97
   8   3  -3    0.47    1.05
   8   3  -3   -0.47    0.75
  -8  -3   3    1.81    1.01
  -8  -3   3    1.46    1.03
   7   3  -3   42.17    2.28
   7   3  -3   44.69    2.30
   7   3  -3   49.83    2.26
  -7  -3   3   45.76    2.22
  -7  -3   3   42.83    2.28
   6   3  -3   -0.13    0.62
   6   3  -3    0.29    0.71
   6   3  -3    0.50    0.55
  -6  -3   3    1.66    0.69
  -6  -3   3   -0.08    0.64
   5   3  -3   16.78    1.06
   5   3  -3   15.37    1.16
   5   3  -3   16.04    1.21
  -5  -3   3   15.77    1.17
  -5  -3   3   15.54    1.08
   4   3  -3    7.50    0.82
   4   3  -3    6.52    0.69
   4   3  -3    6.62    0.68
  -4  -3   3    6.16    0.76
  -4  -3   3    7.65    0.79
   3   3  -3    0.11    0.27
   3   3  -3    0.12    0.30
  -3  -3   3   -0.29    0.31
  -3  -3   3    0.11    0.25
   2   3  -3  107.29    2.58
   2   3  -3  104.99    2.59
   2   3  -3  106.79    2.63
  -2  -3   3  104.30    2.66
  -2  -3   3  103.67    2.62
   1   3  -3   34.07    1.08
   1   3  -3   34.38    1.08
   1   3  -3   35.63    1.05
  -1  -3   3   35.08    1.08
  -1  -3   3   36.19    1.14
  -1  -3   3   34.34    1.12
   0   3  -3   21.07    0.70
   0   3  -3   20.61    0.60
   0  -3   3   21.03    0.70
   0  -3   3   21.61    0.70
   0  -3   3   20.66    0.70
   1  -3   3    1.05    0.13
   1  -3   3    0.98    0.12
   1  -3   3    1.18    0.18
   2  -3   3  215.64    4.56
  -3   3  -3    3.15    0.41
   3  -3   3    3.90    0.23
   3  -3   3    3.43    0.26
   3  -3   3    3.19    0.47
  -4   3  -3    1.77    0.41
   4  -3   3    0.74    0.73
   4  -3   3    1.71    0.31
   4  -3   3    2.29    0.29
  -5   3  -3   40.51    1.64
   5  -3   3   39.89    1.36
   5  -3   3   42.30    1.34
  -6   3  -3    4.52    0.76
   6  -3   3    4.90    0.64
   6  -3   3    4.46    0.59
  -7   3  -3   59.30    1.35
  -7   3  -3   60.39    2.45
  -7   3  -3   60.09    1.34
   7  -3   3   60.44    2.06
   7  -3   3   57.45    2.14
  -8   3  -3    0.00    0.84
  -8   3  -3   -0.01    0.28
  -8   3  -3    0.29    0.25
   8  -3   3   -0.13    0.54
   8  -3   3    0.55    0.71
  -9   3  -3   49.36    1.36
  -9   3  -3   57.04    2.83
  -9   3  -3   50.46    1.32
   9  -3   3   51.39    2.34
   9  -3   3   50.74    2.40
 -10   3  -3    3.34    1.57
  10  -3   3    2.93    1.12
  10  -3   3    2.02    1.29
 -11   3  -3   11.01    2.43
  11  -3   3   12.84    2.00
  11  -3   3   12.23    1.83
  11  -3   3   12.36    2.01
 -11  -2   3   14.81    2.32
 -11  -2   3   15.78    2.27
  10   2  -3    4.67    1.74
  10   2  -3    1.05    1.30
  10   2  -3    3.01    1.44
 -10  -2   3    2.24    1.74
 -10  -2   3    5.45    1.67
 -10  -2   3    8.48    1.62
   9   2  -3    1.60    1.10
   9   2  -3    3.49    1.28
   9   2  -3    1.92    1.32
  -9  -2   3    4.64    1.26
  -9  -2   3    3.83    1.23
   8   2  -3    2.43    1.11
   8   2  -3    2.24    0.83
   8   2  -3    1.76    1.01
  -8  -2   3    2.31    1.02
  -8  -2   3    2.09    0.93
   7   2  -3    2.78    0.80
   7   2  -3    2.39    0.78
   7   2  -3    4.04    0.99
  -7  -2   3    2.81    0.83
   6   2  -3   12.58    1.23
   6   2  -3   12.64    1.24
   6   2  -3   11.42    1.14
  -6  -2   3   13.63    1.16
  -6  -2   3   13.04    1.14
   5   2  -3    0.63    0.55
   5   2  -3    1.59    0.56
   5   2  -3    1.21    0.42
  -5  -2   3    2.40    0.52
  -5  -2   3    1.47    0.50
   4   2  -3   11.51    0.83
   4   2  -3   14.23    0.90
   4   2  -3   13.33    0.86
  -4  -2   3   12.70    0.88
  -4  -2   3   12.76    0.90
   3   2  -3   45.42    1.52
   3   2  -3   45.03    1.49
   3   2  -3   44.56    1.52
  -3  -2   3   44.22    1.50
  -3  -2   3   43.92    1.52
   2   2  -3   20.94    0.90
   2   2  -3   21.30    0.89
   2   2  -3   20.83    0.83
  -2  -2   3   21.84    0.90
  -2  -2   3   20.40    0.86
  -2  -2   3   20.95    0.88
   1   2  -3    0.19    0.21
   1   2  -3   -0.26    0.17
   1   2  -3    0.07    0.15
  -1  -2   3    0.13    0.20
  -1  -2   3   -0.33    0.15
  -1  -2   3    0.11    0.18
   0   2  -3   -0.30    0.13
   0   2  -3   -0.14    0.06
   0   2  -3   -0.28    0.07
   0  -2   3   -0.13    0.11
   0  -2   3   -0.19    0.13
   0  -2   3   -0.23    0.10
   1  -2   3   12.99    0.60
   1  -2   3   12.89    0.50
  -2   2  -3   21.26    0.84
   2  -2   3   22.14    0.88
  -3   2  -3   49.54    1.55
   3  -2   3   51.48    1.57
   3  -2   3   48.12    1.20
   3  -2   3   47.69    1.17
  -4   2  -3    7.68    0.30
  -4   2  -3    8.37    0.72
  -4   2  -3    7.78    0.29
   4  -2   3    7.40    1.24
   4  -2   3    7.98    0.54
   4  -2   3    8.24    0.49
  -5   2  -3   30.20    1.43
  -5   2  -3   31.45    0.93
  -5   2  -3   30.37    0.91
   5  -2   3   30.38    1.16
   5  -2   3   30.15    1.19
  -6   2  -3    6.90    0.80
  -6   2  -3    7.07    0.56
  -6   2  -3    5.52    0.48
   6  -2   3    7.15    0.75
   6  -2   3    7.40    0.68
  -7   2  -3   19.75    0.90
  -7   2  -3   18.51    0.94
  -7   2  -3   20.91    1.50
   7  -2   3   21.04    1.24
   7  -2   3   18.14    1.24
  -8   2  -3    0.45    0.49
  -8   2  -3    0.84    0.86
  -8   2  -3    0.59    0.43
   8  -2   3    0.33    0.65
   8  -2   3   -0.46    0.70
  -9   2  -3    0.53    0.90
  -9   2  -3    1.58    0.57
   9  -2   3   -0.32    0.91
   9  -2   3    0.69    1.01
 -10   2  -3    6.17    1.58
 -10   2  -3    5.07    0.79
 -10   2  -3    4.84    1.06
  10  -2   3    5.33    1.23
  10  -2   3    5.27    1.50
 -11   2  -3   10.92    1.28
 -11   2  -3    7.84    1.18
 -11   2  -3   12.14    2.45
  11  -2   3    9.97    1.89
  11  -2   3    6.12    1.91
  11  -2   3    7.67    2.05
  11   1  -3    6.05    1.96
 -11  -1   3    5.92    1.94
 -11  -1   3    9.18    1.97
 -11  -1   3   10.60    2.74
  10   1  -3    2.20    1.48
  10   1  -3    0.50    1.32
  10   1  -3   -3.01    1.37
 -10  -1   3    0.90    1.45
 -10  -1   3    0.98    1.48
 -10  -1   3    1.29    1.36
   9   1  -3   35.48    2.47
   9   1  -3   33.07    2.25
   9   1  -3   31.27    2.36
  -9  -1   3   39.55    2.38
  -9  -1   3   34.80    2.19
  -9  -1   3   37.68    2.64
   8   1  -3   -0.29    0.93
   8   1  -3    2.72    1.07
   8   1  -3    1.53    0.75
  -8  -1   3    1.37    0.88
  -8  -1   3    0.81    0.97
   7   1  -3   28.46    1.63
  -7  -1   3   27.43    1.66
  -7  -1   3   25.11    1.55
   6   1  -3    1.75    0.68
   6   1  -3    0.35    0.46
   6   1  -3    0.90    0.46
  -6  -1   3    1.71    0.58
  -6  -1   3    0.94    0.60
   5   1  -3   20.68    1.20
   5   1  -3   20.77    1.13
   5   1  -3   19.51    1.11
  -5  -1   3   19.10    1.12
  -5  -1   3   20.64    1.14
   4   1  -3   66.32    1.99
   4   1  -3   61.47    1.96
   4   1  -3   63.76    2.02
  -4  -1   3   62.22    1.97
  -4  -1   3   65.50    2.03
   3   1  -3   30.89    1.13
   3   1  -3   31.41    1.19
   3   1  -3   29.58    1.17
  -3  -1   3   30.20    1.14
  -3  -1   3   29.49    1.14
  -2  -1   3 1000.00   18.85
   1   1  -3    0.00    0.14
   1   1  -3   -0.05    0.19
   1   1  -3    0.01    0.17
  -1  -1   3   -0.17    0.16
  -1  -1   3   -0.10    0.16
  -1  -1   3    0.20    0.18
   0   1  -3  117.74    2.30
   0   1  -3  125.22    2.50
   0   1  -3  116.47    2.31
   0  -1   3  117.04    2.34
   0  -1   3  118.18    2.34
   0  -1   3  121.06    2.49
   1  -1   3    0.79    0.25
  -2   1  -3  161.38    3.12
  -2   1  -3  174.57    3.63
   2  -1   3  158.74    3.26
   2  -1   3  162.85    3.28
   2  -1   3  173.89    3.63
  -3   1  -3    9.02    0.41
  -3   1  -3    9.40    0.40
  -3   1  -3    9.40    0.64
   3  -1   3    7.66    0.66
   3  -1   3    8.56    0.45
   3  -1   3    8.14    0.49
  -4   1  -3   20.12    0.75
  -4   1  -3   19.23    0.98
  -4   1  -3   19.19    0.73
   4  -1   3   20.23    0.85
   4  -1   3   19.74    0.88
  -5   1  -3  100.96    2.96
  -5   1  -3  101.75    2.45
  -5   1  -3  100.62    2.47
   5  -1   3   99.91    2.64
   5  -1   3  104.09    3.00
  -6   1  -3    8.47    0.95
  -6   1  -3    5.59    0.64
  -6   1  -3    8.23    0.64
   6  -1   3    6.85    0.78
   6  -1   3    8.76    0.90
  -7   1  -3   45.23    1.62
  -7   1  -3   41.57    2.08
  -7   1  -3   42.20    1.62
   7  -1   3   41.44    1.86
   7  -1   3   46.22    1.84
  -8   1  -3   -0.39    0.50
  -8   1  -3    0.79    0.86
  -8   1  -3    0.14    0.57
   8  -1   3   -1.42    0.86
   8  -1   3   -0.30    0.62
  -9   1  -3    6.29    0.86
  -9   1  -3    6.77    1.43
  -9   1  -3    6.06    0.99
   9  -1   3    5.99    1.25
   9  -1   3    6.19    1.06
 -10   1  -3    3.42    1.50
 -10   1  -3    1.77    1.08
 -10   1  -3    1.54    0.91
  10  -1   3    2.34    1.25
  10  -1   3    3.11    1.38
 -11   1  -3    7.85    2.22
 -11   1  -3    4.97    1.27
 -11   1  -3    5.20    1.27
  11  -1   3    5.93    1.70
  11  -1   3    2.33    1.78
  11   0  -3    0.88    1.71
 -11   0   3    3.42    1.83
 -11   0   3    1.71    2.08
 -11   0   3    0.13    1.57
  10   0  -3    2.84    1.53
  10   0  -3    1.33    1.31
  10   0  -3    0.74    1.28
 -10   0   3   -0.34    1.25
 -10   0   3    0.61    1.48
 -10   0   3    4.16    1.35
   9   0  -3    4.22    1.24
   9   0  -3    2.85    0.96
   9   0  -3    1.67    1.10
  -9   0   3    1.09    1.02
  -9   0   3    1.53    0.96
  -9   0   3    1.23    1.17
   8   0  -3    2.47    0.95
   8   0  -3    1.35    0.87
   8   0  -3    1.42    0.71
  -8   0   3    0.48    0.80
  -8   0   3    1.03    0.77
   7   0  -3    0.55    0.55
   7   0  -3    1.06    0.77
   7   0  -3    0.74    0.76
  -7   0   3    1.82    0.65
  -7   0   3    1.00    0.61
   6   0  -3    4.68    0.69
   6   0  -3    4.55    0.82
   6   0  -3    4.04    0.72
  -6   0   3    5.19    0.74
  -6   0   3    4.70    0.72
   5   0  -3   10.99    0.86
   5   0  -3   11.78    0.95
   5   0  -3   12.28    0.89
  -5   0   3   13.39    0.91
  -5   0   3   12.65    0.89
   4   0  -3   49.97    1.62
   4   0  -3   48.01    1.88
   4   0  -3   45.49    1.65
  -4   0   3   50.61    1.63
  -4   0   3   48.95    1.60
   3   0  -3   19.81    0.85
   3   0  -3   19.76    0.91
   3   0  -3   19.17    0.90
  -3   0   3   18.89    0.86
  -3   0   3   18.69    0.85
   2   0  -3    5.36    0.48
   2   0  -3    5.85    0.44
   2   0  -3    5.79    0.48
  -2   0   3    5.76    0.44
  -2   0   3    5.73    0.43
  -2   0   3    5.57    0.46
   1   0  -3    0.17    0.15
   1   0  -3    0.22    0.19
   1   0  -3    0.31    0.20
  -1   0   3    0.39    0.20
  -1   0   3    0.39    0.18
  -1   0   3    0.35    0.17
   0   0  -3    9.89    0.40
   0   0  -3    9.51    0.37
   0   0  -3   10.32    0.44
   0   0   3    9.75    0.40
   0   0   3    9.41    0.39
   0   0   3    9.24    0.41
  -1   0  -3    2.20    0.22
  -1   0  -3    2.20    0.30
  -1   0  -3    2.44    0.24
   1   0   3    2.07    0.23
   1   0   3    2.48    0.26
   1   0   3    2.51    0.32
  -2   0  -3    1.78    0.33
  -2   0  -3    1.77    0.25
  -2   0  -3    1.57    0.23
   2   0   3    1.80    0.28
   2   0   3    1.56    0.25
   2   0   3    1.74    0.31
  -3   0  -3   69.11    1.72
  -3   0  -3   67.79    1.93
  -3   0  -3   69.21    1.75
   3   0   3   67.22    1.77
   3   0   3   68.14    1.81
   3   0   3   65.34    1.94
  -4   0  -3    3.45    0.43
  -4   0  -3    2.95    0.44
  -4   0  -3    3.18    0.50
   4   0   3    3.11    0.49
   4   0   3    3.07    0.47
  -5   0  -3   24.75    1.10
  -5   0  -3   25.24    1.07
  -5   0  -3   25.31    1.32
   5   0   3   25.30    1.18
   5   0   3   26.09    1.24
  -6   0  -3    0.54    0.52
  -6   0  -3    0.67    0.42
  -6   0  -3    1.06    0.47
   6   0   3    0.61    0.48
   6   0   3    0.42    0.50
  -7   0  -3    1.08    0.56
  -7   0  -3    1.67    0.62
  -7   0  -3    0.42    0.70
   7   0   3    1.34    0.58
   7   0   3    0.82    0.64
  -8   0  -3    2.23    0.77
  -8   0  -3    1.34    0.70
  -8   0  -3    3.30    0.95
   8   0   3    1.62    0.87
   8   0   3    3.03    0.82
  -9   0  -3   -0.31    0.87
  -9   0  -3   -1.88    1.06
  -9   0  -3    0.96    0.80
   9   0   3   -0.62    0.98
   9   0   3    0.22    0.88
 -10   0  -3    4.64    1.59
 -10   0  -3    5.82    1.43
  10   0   3    5.35    1.42
  10   0   3    5.03    1.56
 -11   0  -3    3.24    1.58
 -11   0  -3   -0.16    2.00
 -11   0  -3    2.49    1.47
  11   0   3   -0.05    1.65
  11  -1  -3    7.48    2.32
  11  -1  -3    9.10    1.77
  11  -1  -3   11.09    2.46
 -11   1   3    9.92    2.28
 -11   1   3    5.28    1.59
 -11   1   3    7.66    1.75
  10  -1  -3    5.60    1.53
  10  -1  -3    7.55    1.38
  10  -1  -3    4.37    1.41
 -10   1   3    3.00    1.07
 -10   1   3    1.68    1.25
 -10   1   3    4.18    1.52
   9  -1  -3   41.07    2.21
   9  -1  -3   42.70    2.49
   9  -1  -3   41.60    2.49
  -9   1   3   38.16    2.53
  -9   1   3   38.49    2.09
   8  -1  -3    1.30    0.86
   8  -1  -3   -0.27    0.83
   8  -1  -3   -1.58    0.68
  -8   1   3    0.23    0.90
  -8   1   3   -0.25    0.72
  -8   1   3    1.18    0.71
   7  -1  -3   30.67    1.60
   7  -1  -3   28.98    1.58
   7  -1  -3   28.34    1.66
  -7   1   3   29.12    1.56
  -7   1   3   29.21    1.53
   6  -1  -3    0.28    0.46
   6  -1  -3    0.47    0.53
   6  -1  -3    0.47    0.43
  -6   1   3    0.03    0.42
  -6   1   3   -0.18    0.40
   5  -1  -3   16.25    0.95
   5  -1  -3   16.06    1.03
   5  -1  -3   15.37    0.94
  -5   1   3   16.02    0.93
  -5   1   3   14.31    0.90
   4  -1  -3   51.79    1.69
   4  -1  -3   52.43    1.67
   4  -1  -3   51.85    1.70
  -4   1   3   52.89    1.64
  -4   1   3   53.32    1.66
   3  -1  -3   16.34    0.83
   3  -1  -3   18.16    0.80
   3  -1  -3   17.25    0.82
  -3   1   3   17.29    0.78
  -3   1   3   17.24    0.80
   2  -1  -3   31.39    1.06
   2  -1  -3   30.90    0.99
   2  -1  -3   33.62    1.04
  -2   1   3   32.35    1.04
  -2   1   3   32.81    1.05
  -2   1   3   33.01    0.99
   1  -1  -3   -0.07    0.13
   1  -1  -3    0.13    0.21
   1  -1  -3    0.13    0.16
  -1   1   3    0.05    0.15
  -1   1   3    0.24    0.20
  -1   1   3    0.07    0.12
   0  -1  -3  107.42    2.35
   0   1   3  105.24    2.36
   0   1   3  107.40    2.34
   0   1   3  107.23    2.26
  -1  -1  -3    3.80    0.33
  -1  -1  -3    3.95    0.36
  -1  -1  -3    3.56    0.37
   1   1   3    3.65    0.39
   1   1   3    3.41    0.36
   1   1   3    3.37    0.32
  -2  -1  -3   77.17    1.96
  -2  -1  -3   80.03    1.95
  -2  -1  -3   76.67    1.96
   2   1   3   78.19    2.00
   2   1   3   77.97    1.96
   2   1   3   77.51    1.97
  -3  -1  -3   25.69    1.06
  -3  -1  -3   23.63    0.97
  -3  -1  -3   23.09    0.97
   3   1   3   24.91    1.01
   3   1   3   24.53    1.05
  -4  -1  -3   34.87    1.32
  -4  -1  -3   35.75    1.45
  -4  -1  -3   37.35    1.36
   4   1   3   36.38    1.38
   4   1   3   35.57    1.42
  -5  -1  -3   53.26    2.00
  -5  -1  -3   55.35    1.84
  -5  -1  -3   52.57    1.83
   5   1   3   52.79    1.94
   5   1   3   54.75    1.91
  -6  -1  -3    2.24    0.58
  -6  -1  -3    3.02    0.62
  -6  -1  -3    2.89    0.72
   6   1   3    1.31    0.57
   6   1   3    1.58    0.64
  -7  -1  -3   48.45    2.01
  -7  -1  -3   47.33    1.99
  -7  -1  -3   50.08    2.28
   7   1   3   45.34    2.06
  -8  -1  -3    0.03    0.78
  -8  -1  -3   -2.20    0.80
  -8  -1  -3    1.11    0.73
   8   1   3   -0.24    0.72
   8   1   3    0.00    0.83
  -9  -1  -3   24.05    2.23
  -9  -1  -3   25.55    2.31
  -9  -1  -3   24.27    1.87
   9   1   3   26.25    2.19
   9   1   3   24.55    2.03
 -10  -1  -3    4.28    1.70
 -10  -1  -3    3.57    1.30
 -10  -1  -3    6.44    1.57
  10   1   3    5.72    1.50
  10   1   3    3.40    1.50
 -11  -1  -3    9.05    3.05
 -11  -1  -3    8.40    1.99
 -11  -1  -3   14.57    2.02
  11   1   3    6.06    2.11
  11  -2  -3    7.52    1.91
  11  -2  -3    5.84    1.66
  11  -2  -3    9.03    1.98
 -11   2   3    4.86    1.39
 -11   2   3    9.88    2.38
 -11   2   3    8.72    1.72
  10  -2  -3   -1.55    1.33
  10  -2  -3   -0.80    1.18
  10  -2  -3   -0.77    1.44
 -10   2   3   -0.10    1.33
 -10   2   3   -0.44    1.38
 -10   2   3    2.40    1.54
   9  -2  -3    6.34    1.37
   9  -2  -3    5.24    1.14
   9  -2  -3    5.38    1.27
  -9   2   3    7.31    1.15
  -9   2   3    4.93    1.33
  -9   2   3    6.11    1.00
   8  -2  -3   12.50    1.44
   8  -2  -3   12.28    1.47
   8  -2  -3   12.22    1.37
  -8   2   3   12.32    1.22
  -8   2   3   10.84    1.21
   7  -2  -3    9.76    1.09
   7  -2  -3    7.28    0.96
   7  -2  -3    5.03    0.95
  -7   2   3    7.60    0.83
  -7   2   3    5.80    1.04
  -7   2   3    7.26    0.89
   6  -2  -3   20.36    1.17
   6  -2  -3   16.79    1.19
   6  -2  -3   19.57    1.21
  -6   2   3   18.88    1.06
  -6   2   3   20.07    1.13
   5  -2  -3   26.78    1.28
   5  -2  -3   24.00    1.18
   5  -2  -3   24.53    1.16
  -5   2   3   25.77    1.18
  -5   2   3   25.52    1.13
   4  -2  -3   55.34    1.79
   4  -2  -3   55.39    1.73
   4  -2  -3   57.48    1.76
  -4   2   3   56.95    1.70
  -4   2   3   59.14    1.72
   3  -2  -3    1.57    0.38
   3  -2  -3    1.19    0.31
   3  -2  -3    1.14    0.31
  -3   2   3    1.43    0.29
  -3   2   3    1.40    0.34
   2  -2  -3   37.08    1.08
   2  -2  -3   39.20    1.25
   2  -2  -3   39.40    1.22
  -2   2   3   39.51    1.23
  -2   2   3   38.96    1.19
  -2   2   3   39.88    1.08
   1  -2  -3   17.09    0.75
   1  -2  -3   16.93    0.57
   1  -2  -3   17.78    0.73
  -1   2   3   16.72    0.55
  -1   2   3   16.80    0.70
  -1   2   3   16.25    0.73
   0  -2  -3    1.01    0.29
   0  -2  -3    0.68    0.26
   0   2   3    1.37    0.27
   0   2   3    1.01    0.31
   0   2   3    0.70    0.16
   0   2   3    0.75    0.13
  -1  -2  -3   44.73    1.38
  -1  -2  -3   45.37    1.17
  -1  -2  -3   46.53    1.38
   1   2   3   45.05    1.40
   1   2   3   45.09    1.36
  -2  -2  -3   14.31    0.78
  -2  -2  -3   14.04    0.78
  -2  -2  -3   13.80    0.66
   2   2   3   14.05    0.76
   2   2   3   13.65    0.80
  -3  -2  -3   54.38    1.76
  -3  -2  -3   54.33    1.70
  -3  -2  -3   52.33    1.71
   3   2   3   53.75    2.54
   3   2   3   55.42    1.74
  -4  -2  -3   -0.10    0.33
  -4  -2  -3    0.42    0.35
  -4  -2  -3   -0.07    0.36
   4   2   3   -0.03    0.40
   4   2   3    0.06    0.35
  -5  -2  -3   53.60    1.94
  -5  -2  -3   55.82    2.00
  -5  -2  -3   53.42    2.05
   5   2   3   56.60    2.04
   5   2   3   53.99    2.06
  -6  -2  -3    3.10    0.69
  -6  -2  -3    2.93    0.70
  -6  -2  -3    3.00    0.78
   6   2   3    3.59    0.70
   6   2   3    2.67    0.76
  -7  -2  -3    6.73    1.14
  -7  -2  -3    5.32    0.96
  -7  -2  -3    6.35    1.03
   7   2   3    5.99    1.06
   7   2   3    6.00    1.12
  -8  -2  -3   15.89    1.86
  -8  -2  -3   17.67    1.80
  -8  -2  -3   17.40    1.75
   8   2   3   20.04    1.85
   8   2   3   19.73    1.70
  -9  -2  -3    1.58    1.27
  -9  -2  -3    0.86    1.13
  -9  -2  -3   -0.73    1.20
   9   2   3    2.83    1.27
   9   2   3    0.76    1.31
 -10  -2  -3   11.78    2.07
 -10  -2  -3   14.46    2.00
 -10  -2  -3   12.72    1.88
  10   2   3   10.76    2.01
  10   2   3   10.24    2.12
  10   2   3   13.48    1.95
 -11  -2  -3    0.03    1.82
  11  -3  -3    6.31    1.94
  11  -3  -3   11.08    1.87
  11  -3  -3    9.45    2.14
 -11   3   3   11.90    2.37
 -11   3   3    9.02    1.39
 -11   3   3    9.80    1.69
  10  -3  -3    1.12    1.31
  10  -3  -3    1.18    1.17
  10  -3  -3    0.59    1.27
 -10   3   3   -1.46    1.37
 -10   3   3    0.68    1.13
 -10   3   3   -0.57    0.95
   9  -3  -3    5.22    1.25
   9  -3  -3    6.80    1.12
   9  -3  -3    7.54    1.34
  -9   3   3    5.46    1.31
  -9   3   3    7.88    1.05
  -9   3   3    5.52    1.06
   8  -3  -3    2.31    0.80
   8  -3  -3    1.38    0.87
  -8   3   3    1.58    0.59
  -8   3   3    3.48    0.98
  -8   3   3    0.90    0.74
   7  -3  -3   24.23    1.56
   7  -3  -3   24.54    1.54
   7  -3  -3   27.17    1.54
  -7   3   3   22.51    1.33
  -7   3   3   22.98    1.56
  -7   3   3   24.42    1.26
   6  -3  -3    0.57    0.54
   6  -3  -3   -0.30    0.41
   6  -3  -3    0.73    0.48
  -6   3   3    0.43    0.46
  -6   3   3    0.45    0.39
  -6   3   3    0.12    0.42
   5  -3  -3   37.53    1.49
   5  -3  -3   35.88    2.12
   5  -3  -3   34.54    1.49
  -5   3   3   35.67    1.35
  -5   3   3   38.59    1.53
  -5   3   3   33.52    1.33
   4  -3  -3   31.44    1.18
   4  -3  -3   31.49    1.55
   4  -3  -3   32.26    1.28
  -4   3   3   31.63    1.17
  -4   3   3   32.33    1.22
   3  -3  -3   13.97    0.85
   3  -3  -3   14.59    0.79
   3  -3  -3   14.73    0.68
  -3   3   3   14.59    0.74
  -3   3   3   14.05    0.75
   2  -3  -3   45.80    1.46
   2  -3  -3   45.61    1.16
   2  -3  -3   47.40    1.46
  -2   3   3   46.45    1.42
  -2   3   3   45.20    1.38
   1  -3  -3    4.09    0.51
   1  -3  -3    4.93    0.48
  -1   3   3    5.10    0.45
  -1   3   3    5.28    0.28
  -1   3   3    4.88    0.50
   0  -3  -3   88.77    2.31
   0  -3  -3   88.11    2.28
   0   3   3   89.64    2.29
   0   3   3   87.86    2.26
  -1  -3  -3   12.12    0.75
  -1  -3  -3   12.04    0.75
  -1  -3  -3   12.52    0.53
   1   3   3   12.76    0.72
   1   3   3   11.65    0.75
  -2  -3  -3    8.74    0.56
  -2  -3  -3    8.23    0.85
  -2  -3  -3    7.00    0.66
   2   3   3    8.56    0.67
   2   3   3    9.87    1.37
  -3  -3  -3    2.86    0.46
  -3  -3  -3    3.65    0.58
  -3  -3  -3    4.29    0.62
   3   3   3    4.05    0.55
   3   3   3    3.67    0.63
  -4  -3  -3    6.72    0.84
  -4  -3  -3    9.44    0.87
  -4  -3  -3    8.56    0.84
   4   3   3    8.98    0.78
   4   3   3    9.66    0.93
  -5  -3  -3    7.50    0.94
  -5  -3  -3    7.08    0.87
  -5  -3  -3    9.89    1.07
   5   3   3    8.43    0.98
   5   3   3    7.57    0.98
  -6  -3  -3   -0.84    0.57
  -6  -3  -3   -0.03    0.62
  -6  -3  -3   -0.50    0.61
   6   3   3    0.28    0.54
   6   3   3    0.46    0.55
  -7  -3  -3   26.94    1.80
   7   3   3   20.95    1.84
   7   3   3   26.90    1.78
  -8  -3  -3    0.99    1.00
  -8  -3  -3    2.24    1.11
  -8  -3  -3    5.00    1.22
   8   3   3    3.69    1.14
   8   3   3    3.41    1.24
  -9  -3  -3    2.70    1.36
  -9  -3  -3    1.61    1.42
  -9  -3  -3    2.91    1.40
   9   3   3    4.63    1.45
   9   3   3    0.92    1.49
 -10  -3  -3    1.64    1.66
 -10  -3  -3    1.17    1.81
 -10  -3  -3    3.51    1.90
  10   3   3    4.37    1.94
  11  -4  -3    8.37    1.86
  11  -4  -3    7.37    2.10
  11  -4  -3   10.52    2.03
 -11   4   3    7.68    1.11
 -11   4   3    9.01    2.15
  10  -4  -3    0.64    1.51
  10  -4  -3    1.02    1.28
  10  -4  -3    3.16    1.38
 -10   4   3    0.73    1.04
 -10   4   3   -0.89    0.81
 -10   4   3    1.16    1.50
   9  -4  -3    4.10    1.18
   9  -4  -3    4.19    1.27
   9  -4  -3    3.89    1.08
  -9   4   3    3.05    0.72
  -9   4   3    5.46    0.99
  -9   4   3    4.73    1.21
   8  -4  -3    8.45    1.26
   8  -4  -3    8.06    1.13
   8  -4  -3    8.29    1.15
  -8   4   3    8.80    1.24
  -8   4   3    6.94    0.93
  -8   4   3    6.32    0.75
   7  -4  -3   13.40    1.21
   7  -4  -3   11.90    1.16
   7  -4  -3   12.19    1.32
  -7   4   3   11.94    0.91
  -7   4   3   15.91    1.13
  -7   4   3   12.73    1.31
   6  -4  -3   51.24    1.93
   6  -4  -3   49.45    1.83
   6  -4  -3   50.86    2.01
  -6   4   3   50.01    1.69
  -6   4   3   48.07    1.94
  -6   4   3   50.93    1.87
   5  -4  -3   -0.24    0.36
   5  -4  -3   -0.18    0.42
   5  -4  -3   -0.51    0.37
  -5   4   3    0.27    0.38
  -5   4   3   -0.30    0.39
  -5   4   3   -0.23    0.29
   4  -4  -3   49.41    1.76
   4  -4  -3   52.86    1.77
   4  -4  -3   50.97    1.51
  -4   4   3   50.76    1.62
  -4   4   3   48.57    1.56
  -4   4   3   52.10    1.60
   3  -4  -3    5.95    0.65
   3  -4  -3    7.16    0.47
  -3   4   3    6.81    0.44
  -3   4   3    7.52    0.58
  -3   4   3    7.42    0.65
   2  -4  -3   48.12    1.61
   2  -4  -3   50.31    1.61
   2  -4  -3   50.14    1.15
  -2   4   3   47.79    1.10
  -2   4   3   47.26    1.53
  -2   4   3   48.03    1.50
   1  -4  -3    6.12    0.60
  -1   4   3    7.54    0.31
  -1   4   3    7.65    0.67
  -1   4   3    8.36    0.62
   0  -4  -3    2.76    0.48
   0   4   3    3.25    0.51
   0   4   3    3.86    0.47
  -1  -4  -3   23.89    1.15
  -1  -4  -3   24.62    0.77
  -1  -4  -3   25.40    1.19
   1   4   3   23.11    1.16
   1   4   3   23.32    1.10
  -2  -4  -3    2.90    0.60
  -2  -4  -3    1.55    0.47
  -2  -4  -3    2.22    0.35
   2   4   3    1.27    0.47
   2   4   3    1.77    0.47
  -3  -4  -3   60.38    2.12
  -3  -4  -3   64.60    2.25
  -3  -4  -3   61.94    1.92
   3   4   3   66.65    2.23
   3   4   3   64.84    2.17
  -4  -4  -3    2.84    0.67
  -4  -4  -3    3.13    0.58
  -4  -4  -3    3.38    0.72
   4   4   3    3.14    0.63
   4   4   3    3.94    0.79
  -5  -4  -3   32.27    1.74
  -5  -4  -3   32.83    1.64
  -5  -4  -3   33.20    1.77
   5   4   3   32.15    2.09
   5   4   3   31.49    1.68
  -6  -4  -3    0.50    0.77
  -6  -4  -3   -0.35    0.79
   6   4   3    0.25    0.72
   6   4   3    0.24    0.95
  -7  -4  -3    0.72    0.94
  -7  -4  -3    0.97    0.91
  -7  -4  -3    0.12    0.95
   7   4   3   -0.60    0.85
   7   4   3    0.01    1.02
  -8  -4  -3    6.86    1.54
  -8  -4  -3    7.62    1.50
  -8  -4  -3    6.70    1.53
   8   4   3    6.20    1.56
   8   4   3    5.79    1.33
  -9  -4  -3    2.96    1.69
  -9  -4  -3    2.57    1.59
  -9  -4  -3    1.00    1.55
   9   4   3    3.33    1.71
   9   4   3    6.63    1.64
   9   4   3    1.25    1.40
 -10  -4  -3   11.72    2.25
 -10  -4  -3    8.64    2.44
 -10  -4  -3   11.07    2.54
  11  -5  -3    7.73    1.99
  11  -5  -3    6.47    1.91
  11  -5  -3    7.88    3.97
 -11   5   3    7.41    2.21
  10  -5  -3    2.14    1.67
  10  -5  -3    4.24    1.39
  10  -5  -3    2.73    1.51
 -10   5   3    3.34    1.61
 -10   5   3    3.84    0.72
 -10   5   3    0.82    1.04
   9  -5  -3   35.88    2.20
   9  -5  -3   32.25    2.33
   9  -5  -3   37.32    2.27
  -9   5   3   35.79    1.48
  -9   5   3   39.30    2.49
   8  -5  -3    0.33    0.93
   8  -5  -3    0.82    0.79
  -8   5   3    0.72    0.71
  -8   5   3    0.17    0.49
  -8   5   3    1.08    0.86
   7  -5  -3   25.35    1.60
   7  -5  -3   25.35    1.49
   7  -5  -3   26.97    1.78
  -7   5   3   23.39    1.14
  -7   5   3   24.63    1.27
  -7   5   3   24.34    1.51
   6  -5  -3    1.49    0.58
   6  -5  -3    0.37    0.47
   6  -5  -3    0.64    0.68
  -6   5   3    0.98    0.36
  -6   5   3    0.89    0.48
  -6   5   3    0.73    0.46
   5  -5  -3   22.89    1.28
   5  -5  -3   22.14    1.04
   5  -5  -3   22.92    1.34
  -5   5   3   22.16    1.09
  -5   5   3   22.17    1.00
  -5   5   3   22.51    1.09
   4  -5  -3   14.43    0.71
   4  -5  -3   16.68    1.05
   4  -5  -3   14.68    1.02
  -4   5   3   14.85    0.76
  -4   5   3   15.62    0.91
  -4   5   3   16.09    0.83
   3  -5  -3    2.82    0.56
   3  -5  -3    1.95    0.25
   3  -5  -3    2.55    0.53
  -3   5   3    2.34    0.42
  -3   5   3    2.35    0.49
  -3   5   3    2.44    0.27
   2  -5  -3   93.14    2.61
   2  -5  -3   91.86    2.61
  -2   5   3   90.80    2.46
  -2   5   3   95.41    2.46
   1  -5  -3    5.65    0.66
   1  -5  -3    5.21    0.67
  -1   5   3    6.06    0.22
  -1   5   3    6.53    0.63
  -1   5   3    6.22    0.64
   0  -5  -3   18.17    1.06
   0  -5  -3   17.24    1.03
   0   5   3   16.17    0.95
   0   5   3   15.47    0.59
   0   5   3   16.27    0.98
  -1  -5  -3    1.59    0.53
  -1  -5  -3    1.61    0.49
  -1  -5  -3    1.94    0.27
   1   5   3    1.90    0.55
  -2  -5  -3    6.82    0.83
  -2  -5  -3    5.15    0.76
  -2  -5  -3    5.52    0.52
   2   5   3    5.00    0.72
   2   5   3    4.21    0.76
  -3  -5  -3    4.88    0.62
  -3  -5  -3    6.62    0.91
  -3  -5  -3    6.05    0.88
   3   5   3    7.03    0.87
   3   5   3    5.83    0.89
  -4  -5  -3    5.64    0.96
  -4  -5  -3    6.18    1.09
  -4  -5  -3    6.89    0.85
   4   5   3    5.44    0.90
   4   5   3    4.75    0.96
  -5  -5  -3   15.26    1.22
  -5  -5  -3   13.15    1.65
  -5  -5  -3   19.29    1.58
   5   5   3   16.07    1.57
  -6  -5  -3    2.12    0.95
  -6  -5  -3    2.18    0.84
  -6  -5  -3   -0.82    0.91
   6   5   3   -0.24    0.96
   6   5   3    0.80    0.83
  -7  -5  -3   24.74    2.09
  -7  -5  -3   21.95    2.17
  -7  -5  -3   23.18    1.86
   7   5   3   21.71    2.20
   7   5   3   24.41    2.05
  -8  -5  -3    2.32    1.44
  -8  -5  -3    3.34    1.52
  -8  -5  -3   -1.67    1.38
   8   5   3    1.58    1.30
   8   5   3   -2.08    1.30
   8   5   3    0.99    1.44
  -9  -5  -3    9.75    2.13
  -9  -5  -3    8.74    1.92
  -9  -5  -3    5.65    1.94
   9   5   3    7.39    2.03
  10  -6  -3    2.41    1.49
  10  -6  -3    6.91    1.59
  10  -6  -3    5.93    1.82
 -10   6   3    2.40    1.59
   9  -6  -3   12.04    1.71
   9  -6  -3    3.55    1.25
   9  -6  -3    6.57    1.32
  -9   6   3    7.24    0.48
  -9   6   3    5.29    1.44
   8  -6  -3   21.76    1.86
   8  -6  -3   15.12    1.52
   8  -6  -3   17.60    1.71
  -8   6   3   18.02    1.67
  -8   6   3   17.03    0.96
  -8   6   3   18.84    0.88
   7  -6  -3    0.77    0.79
   7  -6  -3    1.94    0.91
   7  -6  -3    1.67    0.65
  -7   6   3    1.62    0.38
  -7   6   3    1.37    0.53
  -7   6   3    2.89    0.72
   6  -6  -3   46.65    2.14
   6  -6  -3   46.28    2.03
   6  -6  -3   42.58    1.70
  -6   6   3   47.59    1.57
  -6   6   3   46.92    1.80
  -6   6   3   45.79    1.45
   5  -6  -3    0.92    0.53
   5  -6  -3   -0.03    0.31
   5  -6  -3    1.02    0.61
  -5   6   3    0.74    0.34
  -5   6   3    0.12    0.34
  -5   6   3    0.32    0.44
   4  -6  -3   26.49    1.38
   4  -6  -3   26.98    0.83
   4  -6  -3   28.48    1.52
  -4   6   3   26.64    1.19
  -4   6   3   26.05    0.94
  -4   6   3   25.83    1.08
   3  -6  -3    1.81    0.58
   3  -6  -3    1.51    0.58
  -3   6   3    1.79    0.47
  -3   6   3    1.64    0.41
   2  -6  -3   41.60    1.71
  -2   6   3   40.10    1.47
  -2   6   3   39.57    1.68
   1  -6  -3   17.96    1.15
   1  -6  -3   21.24    1.28
  -1   6   3   19.11    1.11
  -1   6   3   20.48    1.09
   0  -6  -3    0.02    0.47
   0  -6  -3    0.64    0.49
   0   6   3    0.47    0.44
   0   6   3    0.23    0.17
   0   6   3    0.03    0.47
  -1  -6  -3   21.46    1.36
  -1  -6  -3   24.34    0.74
  -1  -6  -3   23.58    1.38
   1   6   3   23.33    1.34
   1   6   3   25.98    1.35
  -2  -6  -3    3.08    0.42
  -2  -6  -3    3.04    0.77
  -2  -6  -3    3.47    0.77
   2   6   3    2.99    0.71
   2   6   3    2.31    0.70
  -3  -6  -3   69.35    2.61
  -3  -6  -3   61.37    2.49
  -3  -6  -3   64.00    2.00
   3   6   3   64.29    2.42
   3   6   3   64.20    2.51
  -4  -6  -3   -0.04    0.50
  -4  -6  -3    0.30    0.71
  -4  -6  -3   -1.27    0.69
   4   6   3    0.47    0.75
  -5  -6  -3   23.09    1.60
  -5  -6  -3   20.01    1.77
  -5  -6  -3   23.10    1.89
   5   6   3   24.04    1.72
   5   6   3   23.29    1.99
  -6  -6  -3    4.96    1.30
  -6  -6  -3    2.84    0.99
  -6  -6  -3    4.29    1.30
   6   6   3    1.82    1.24
   6   6   3    3.11    1.17
  -7  -6  -3    1.38    1.37
  -7  -6  -3    0.87    1.19
  -7  -6  -3    2.55    1.37
   7   6   3    3.45    1.53
   7   6   3   -0.20    1.17
   7   6   3    2.35    1.35
  -8  -6  -3    2.74    1.78
  -8  -6  -3    1.75    1.67
  -8  -6  -3    1.54    1.87
   8   6   3    3.42    1.70
   8   6   3    2.01    1.72
  10  -7  -3    4.43    1.97
  10  -7  -3    5.46    1.48
  10  -7  -3    2.83    1.74
 -10   7   3    6.39    1.85
   9  -7  -3   20.33    2.07
   9  -7  -3   24.03    1.88
   9  -7  -3   21.69    2.53
  -9   7   3   22.59    2.17
   8  -7  -3    2.55    0.86
   8  -7  -3    1.85    1.26
   8  -7  -3    4.23    1.14
  -8   7   3    4.11    1.07
   7  -7  -3   10.80    1.08
   7  -7  -3   13.28    1.66
  -7   7   3    9.58    1.15
   6  -7  -3   -0.09    0.74
   6  -7  -3   -0.05    0.97
   6  -7  -3    0.18    0.40
  -6   7   3    0.29    0.46
  -6   7   3    0.23    0.36
  -6   7   3   -0.47    0.33
   5  -7  -3    5.38    0.89
   5  -7  -3    3.24    0.41
   5  -7  -3    3.25    0.86
  -5   7   3    3.41    0.54
  -5   7   3    3.05    0.44
  -5   7   3    3.35    0.47
   4  -7  -3    6.75    1.04
   4  -7  -3    7.34    0.97
  -4   7   3    8.30    0.69
  -4   7   3    7.52    0.82
   3  -7  -3    5.75    0.88
   3  -7  -3    4.46    0.77
  -3   7   3    5.31    0.60
  -3   7   3    5.94    0.72
   2  -7  -3    2.58    0.65
   2  -7  -3    3.50    0.79
  -2   7   3    4.66    0.70
  -2   7   3    5.21    0.63
   1  -7  -3   11.71    1.11
   1  -7  -3   12.35    1.15
  -1   7   3   10.49    1.00
  -1   7   3   13.31    0.95
   0  -7  -3   15.22    1.25
   0  -7  -3   13.84    1.31
   0   7   3   13.89    1.21
   0   7   3   14.85    1.08
   0   7   3   13.09    0.47
   0   7   3   13.65    0.53
  -1  -7  -3    1.66    0.76
  -1  -7  -3    1.85    0.22
   1   7   3    2.26    0.46
   1   7   3    3.17    0.77
   1   7   3    1.62    0.66
  -2  -7  -3   13.18    0.72
  -2  -7  -3   10.53    1.35
  -2  -7  -3   12.55    1.38
   2   7   3   11.97    1.44
   2   7   3   11.95    1.18
  -3  -7  -3    1.48    0.87
  -3  -7  -3    1.12    0.46
  -3  -7  -3    0.61    0.83
   3   7   3    2.64    0.93
   3   7   3    1.89    0.67
   3   7   3    2.29    0.97
  -4  -7  -3    0.45    0.57
  -4  -7  -3   -0.67    0.88
  -4  -7  -3   -1.30    0.81
   4   7   3   -0.53    0.69
   4   7   3    0.17    0.86
   4   7   3    1.21    1.01
  -5  -7  -3   12.43    1.66
  -5  -7  -3   13.34    1.39
  -5  -7  -3   10.51    1.63
   5   7   3   13.12    1.65
   5   7   3   12.63    1.69
   5   7   3   11.29    1.48
  -6  -7  -3    4.91    1.48
  -6  -7  -3    6.15    1.54
  -6  -7  -3    7.42    1.50
   6   7   3    6.02    1.46
   6   7   3    5.56    1.50
   6   7   3    5.85    1.42
  -7  -7  -3   13.66    2.20
  -7  -7  -3   16.21    2.09
  -7  -7  -3   14.99    2.26
   7   7   3    9.17    1.94
   7   7   3    8.89    2.10
   7   7   3   13.50    2.06
  -8  -7  -3    1.97    1.92
   8   7   3    1.26    2.12
   9  -8  -3   -0.50    1.64
   9  -8  -3    4.38    1.03
   9  -8  -3    3.11    1.56
  -9   8   3    1.33    1.32
   8  -8  -3   17.66    1.27
   8  -8  -3   13.56    1.81
   8  -8  -3   18.81    2.07
  -8   8   3   14.98    1.60
   7  -8  -3   -1.86    0.99
   7  -8  -3    0.91    0.49
   7  -8  -3    0.23    1.17
  -7   8   3    0.24    0.68
   6  -8  -3   27.81    2.09
   5  -8  -3   -0.66    0.78
   5  -8  -3    0.09    0.82
  -5   8   3    0.33    0.31
  -5   8   3    0.37    0.37
   4  -8  -3   32.53    1.92
   4  -8  -3   34.90    1.92
   3  -8  -3   -0.89    0.71
  -3   8   3   -0.08    0.44
   2  -8  -3   21.23    1.50
   2  -8  -3   18.08    1.79
  -2   8   3   19.36    1.14
  -2   8   3   19.65    1.29
   1  -8  -3   14.34    1.40
   1  -8  -3   16.40    1.53
  -1   8   3   15.25    1.27
  -1   8   3   17.57    1.18
   0  -8  -3   -0.57    0.77
   0  -8  -3    1.97    0.81
   0   8   3    0.43    0.72
   0   8   3   -0.49    0.69
  -1  -8  -3   44.17    2.25
  -1  -8  -3   46.34    2.31
   1   8   3   43.90    2.02
   1   8   3   43.87    2.20
   1   8   3   47.85    1.44
  -2  -8  -3    0.82    0.91
  -2  -8  -3    0.12    0.85
  -2  -8  -3    1.07    0.31
   2   8   3    2.31    1.03
   2   8   3    0.99    0.96
  -3  -8  -3   54.10    2.82
  -3  -8  -3   56.53    1.84
  -3  -8  -3   57.14    2.79
   3   8   3   60.45    2.26
   3   8   3   54.52    2.66
  -4  -8  -3    0.17    1.22
  -4  -8  -3   -0.14    0.66
  -4  -8  -3    1.02    1.20
   4   8   3   -0.32    1.19
   4   8   3   -0.08    1.10
   4   8   3    0.17    1.04
  -5  -8  -3   15.78    1.58
  -5  -8  -3   18.21    2.11
  -5  -8  -3   16.51    2.12
   5   8   3   17.07    1.89
   5   8   3   16.10    2.06
   5   8   3   20.60    2.29
  -6  -8  -3    1.43    1.26
  -6  -8  -3   -3.37    1.76
   6   8   3   -2.10    1.70
   6   8   3   -0.99    1.52
   6   8   3    1.75    1.57
  -7  -8  -3    3.02    1.74
   7   8   3    2.90    2.49
   7   8   3    4.44    1.93
   8  -9  -3    1.96    1.74
   8  -9  -3   -0.62    1.49
   7  -9  -3    3.86    1.56
   7  -9  -3   -0.75    1.23
   6  -9  -3    1.13    1.13
   6  -9  -3    2.82    1.09
   5  -9  -3    0.94    1.12
   5  -9  -3    1.52    0.99
   4  -9  -3    6.33    1.22
  -4   9   3    7.65    0.68
  -4   9   3    7.91    0.77
   3  -9  -3   10.30    1.44
   3  -9  -3   10.74    1.46
  -3   9   3   10.40    0.93
  -3   9   3   10.26    1.08
   2  -9  -3   15.34    1.62
   2  -9  -3   12.40    1.49
  -2   9   3   14.66    1.13
  -2   9   3   14.54    1.34
   1  -9  -3    6.50    1.24
   1  -9  -3    4.43    1.07
  -1   9   3    5.08    0.79
  -1   9   3    4.57    1.00
   0  -9  -3   19.29    1.81
   0  -9  -3   19.84    1.80
   0   9   3   13.69    1.61
   0   9   3   17.43    1.52
  -1  -9  -3   -0.57    1.07
  -1  -9  -3    1.99    1.05
   1   9   3    0.39    0.96
   1   9   3    1.87    1.06
   1   9   3   -0.01    0.24
   1   9   3    0.14    0.34
  -2  -9  -3    1.97    1.18
  -2  -9  -3   -1.95    1.10
   2   9   3    0.13    1.01
   2   9   3   -0.27    0.95
   2   9   3   -0.05    1.17
  -3  -9  -3   -0.58    0.46
  -3  -9  -3   -2.50    1.26
  -3  -9  -3    0.31    1.32
   3   9   3   -0.29    1.21
   3   9   3    1.10    0.93
   3   9   3    1.21    1.46
  -4  -9  -3    1.17    0.77
  -4  -9  -3    1.76    1.54
  -4  -9  -3   -0.43    1.53
   4   9   3    0.73    1.23
   4   9   3   -0.26    1.63
  -5  -9  -3    7.36    2.18
  -5  -9  -3    7.22    1.23
   5   9   3   12.41    2.16
   5   9   3   11.14    1.85
   7 -10  -3    1.10    1.63
   7 -10  -3    1.85    1.74
   6 -10  -3   19.86    2.40
   6 -10  -3   17.14    2.15
   5 -10  -3    0.30    1.24
   4 -10  -3   36.16    2.58
   4 -10  -3   38.74    2.62
   3 -10  -3    1.10    1.22
   3 -10  -3    2.93    1.28
  -3  10   3    1.64    0.67
  -3  10   3    1.73    0.58
   2 -10  -3    6.87    1.34
   2 -10  -3    7.12    1.41
  -2  10   3    6.33    1.06
  -2  10   3    5.70    0.85
   1 -10  -3    9.21    1.64
   1 -10  -3    6.66    1.56
  -1  10   3    8.69    1.12
  -1  10   3   10.45    1.29
   0 -10  -3    4.67    1.43
   0 -10  -3    3.76    1.32
   0  10   3    3.18    1.01
   0  10   3    2.39    1.24
  -1 -10  -3   27.26    2.43
  -1 -10  -3   24.35    2.37
   1  10   3   21.83    2.30
   1  10   3   25.55    2.05
  -2 -10  -3   -0.56    1.50
  -2 -10  -3    0.34    1.49
   2  10   3    0.88    0.48
   2  10   3   -1.26    1.31
   2  10   3   -0.93    0.58
   2  10   3    0.11    1.40
  -3 -10  -3   20.85    2.62
   3  10   3   21.89    1.66
   3  10   3   21.30    2.20
   3  10   3   21.40    2.43
  -4 -10  -3    2.89    3.75
   4  10   3    0.40    1.80
   4  10   3    2.87    1.78
   5 -11  -3    0.94    1.70
   5 -11  -3   -0.27    1.81
   4 -11  -3    3.19    1.55
   4 -11  -3    3.88    1.77
   3 -11  -3   11.82    1.97
   3 -11  -3   13.13    1.92
   2 -11  -3    4.74    1.67
  -2  11   3    2.64    0.82
   1 -11  -3    9.43    2.00
   1 -11  -3    3.97    1.78
  -1  11   3    6.34    1.14
  -1  11   3    6.37    1.17
   0 -11  -3    7.09    1.86
   0 -11  -3    4.54    1.96
  -1 -11  -3    6.50    2.21
   1  11   3    6.43    1.56
   1  11   3    4.94    1.64
  -2 -11  -3   -1.25    2.46
   2  11   3   -2.42    1.78
   2  11   3    0.03    1.69
   0 -12   4   10.06    2.07
   0 -12   4    4.43    1.92
   1 -12   4    0.09    1.58
   1 -12   4    1.05    1.72
   2 -12   4   20.24    2.45
   2 -12   4   18.65    2.16
   3 -12   4    2.47    1.53
   3 -12   4   -2.44    1.40
   4 -12   4    6.00    1.53
  -3 -11   4   19.65    2.66
   2  11  -4    0.52    0.74
   2  11  -4    3.62    0.97
   2  11  -4    2.04    1.03
  -2 -11   4    5.79    1.85
  -2 -11   4    3.95    1.59
  -1 -11   4   13.24    1.93
   0 -11   4    1.74    1.37
   0 -11   4   -0.10    0.53
   0 -11   4    0.77    1.32
   1 -11   4    6.20    0.70
   1 -11   4    6.93    1.32
   1 -11   4    7.84    1.46
   2 -11   4    7.53    1.33
   2 -11   4    5.18    1.30
   3 -11   4    0.02    1.11
   4 -11   4   21.72    1.98
   4 -11   4   21.43    1.87
   5 -11   4   -0.72    1.12
   5 -11   4    1.27    1.08
   5  10  -4    8.33    1.84
   5  10  -4    7.70    1.72
   5  10  -4    7.37    2.08
  -5 -10   4   17.27    2.67
   4  10  -4    1.27    1.58
   4  10  -4    2.19    1.49
  -4 -10   4   -0.99    1.58
  -4 -10   4    1.04    1.68
   3  10  -4    4.96    1.67
   3  10  -4    4.36    1.13
   3  10  -4    5.91    1.17
  -3 -10   4    6.28    1.75
  -3 -10   4    3.87    1.55
   2  10  -4   10.47    1.30
   2  10  -4   10.86    1.33
   2  10  -4   12.21    1.30
  -2 -10   4   10.77    1.63
  -2 -10   4   13.58    1.84
   1  10  -4    1.43    0.59
   1  10  -4    1.13    0.45
   1  10  -4    0.26    0.66
  -1 -10   4    0.48    1.00
  -1 -10   4    2.77    1.07
   0 -10   4    5.90    0.74
   0 -10   4    7.57    1.31
   0 -10   4    3.37    1.08
   1 -10   4    1.65    0.52
   1 -10   4    2.46    0.91
   1 -10   4    0.49    0.89
   2 -10   4   31.88    1.90
   2 -10   4   33.80    1.32
   3 -10   4    2.64    0.84
   3 -10   4    1.14    0.84
   3 -10   4    3.27    0.63
   4 -10   4    7.99    1.11
   4 -10   4    8.68    1.11
   5 -10   4   14.81    1.39
   6 -10   4    4.48    0.87
   6 -10   4    3.93    1.30
   7 -10   4   14.94    1.60
   7 -10   4   17.77    1.62
   8 -10   4    0.79    1.22
   6   9  -4    1.97    1.68
   6   9  -4   -1.69    1.63
   6   9  -4    3.67    1.98
  -6  -9   4    2.03    2.03
   5   9  -4   14.24    1.80
   5   9  -4   11.65    1.89
   5   9  -4   14.15    1.79
  -5  -9   4    7.03    1.72
  -5  -9   4   10.12    1.90
   4   9  -4    3.29    1.12
   4   9  -4    1.03    1.29
   4   9  -4    2.60    1.24
  -4  -9   4    1.60    1.28
  -4  -9   4    2.79    1.39
   3   9  -4   26.37    2.00
   3   9  -4   24.59    1.73
  -3  -9   4   21.91    2.20
  -3  -9   4   22.88    2.10
   2   9  -4    1.23    0.69
   2   9  -4    1.54    0.69
   2   9  -4    1.61    0.85
  -2  -9   4    1.27    0.99
  -2  -9   4    2.81    1.00
   1   9  -4   24.79    1.18
   1   9  -4   24.89    1.13
   1   9  -4   23.90    1.51
  -1  -9   4   23.93    1.75
  -1  -9   4   25.04    1.78
   0   9  -4    4.35    0.36
   0   9  -4    4.80    0.47
   0  -9   4    5.35    1.01
   1  -9   4    4.99    0.88
   1  -9   4    6.35    0.79
   1  -9   4    7.58    1.05
   2  -9   4    7.92    0.93
   2  -9   4    8.01    0.99
   2  -9   4    6.50    0.73
   3  -9   4   -0.16    0.59
   3  -9   4    1.02    0.62
   3  -9   4   -1.13    0.54
   4  -9   4   10.80    1.03
   4  -9   4   12.32    1.14
   5  -9   4    0.40    0.68
   5  -9   4    0.71    0.57
   6  -9   4   15.47    1.22
   6  -9   4   13.26    0.58
   6  -9   4   14.36    0.56
   6  -9   4   12.98    1.38
   7  -9   4    1.35    0.46
   7  -9   4    2.19    0.92
   7  -9   4    1.52    0.54
   7  -9   4    0.36    0.71
   8  -9   4   13.10    1.50
   8  -9   4   13.63    1.29
   8  -9   4   14.59    1.23
   8  -9   4   16.26    1.58
   9  -9   4    4.56    1.27
   9  -9   4    3.01    1.33
   7   8  -4   10.32    2.12
   7   8  -4    8.78    2.12
   7   8  -4    5.87    1.82
  -7  -8   4    7.94    2.26
   6   8  -4    5.48    1.47
   6   8  -4    1.97    1.62
   6   8  -4    5.83    1.45
  -6  -8   4   -0.12    1.49
  -6  -8   4    2.43    1.42
   5   8  -4   18.09    2.19
   5   8  -4   13.77    1.58
   5   8  -4   15.75    1.79
  -5  -8   4   10.87    1.80
  -5  -8   4   13.94    1.78
   4   8  -4   -0.58    0.97
   4   8  -4   -1.10    0.77
   4   8  -4    1.45    1.00
  -4  -8   4    0.26    0.98
  -4  -8   4    0.48    1.01
   3   8  -4   25.80    1.55
   3   8  -4   23.04    1.58
   3   8  -4   23.02    1.54
  -3  -8   4   24.15    1.90
  -3  -8   4   22.17    1.86
   2   8  -4   13.55    1.25
   2   8  -4   12.84    1.11
  -2  -8   4   12.21    1.36
  -2  -8   4   13.26    1.38
   1   8  -4   -0.26    0.40
   1   8  -4    0.75    0.49
   1   8  -4    0.23    0.41
  -1  -8   4   -0.24    0.61
  -1  -8   4   -0.63    0.60
   0   8  -4   15.07    0.73
   0   8  -4   16.27    0.72
   0   8  -4   15.38    0.63
   0  -8   4   16.92    1.26
   0  -8   4   16.05    1.17
   1  -8   4    0.17    0.43
   1  -8   4    0.83    0.50
   1  -8   4    0.03    0.47
   2  -8   4   38.38    1.55
   2  -8   4   34.67    1.48
   2  -8   4   34.27    1.38
   3  -8   4    5.39    0.71
   3  -8   4    6.40    0.74
   3  -8   4    6.42    1.12
   4  -8   4   34.10    1.45
   4  -8   4   33.74    1.57
   4  -8   4   33.47    1.39
   5  -8   4   15.95    1.09
   5  -8   4   16.89    0.68
   5  -8   4   17.07    1.03
   5  -8   4   17.77    0.75
   6  -8   4    3.38    0.71
   6  -8   4    3.00    0.56
   6  -8   4    2.48    0.48
   6  -8   4    2.24    0.55
   7  -8   4   24.91    1.54
   7  -8   4   24.80    1.37
   7  -8   4   24.40    1.40
   8  -8   4    1.61    0.79
   8  -8   4    1.65    0.94
   8  -8   4    2.04    0.91
   9  -8   4   17.74    1.79
   9  -8   4   25.35    2.07
   8   7  -4   -1.07    1.74
   8   7  -4    1.78    2.00
   8   7  -4    0.53    1.90
  -8  -7   4   -2.42    2.06
   7   7  -4   -2.23    1.42
   7   7  -4    2.56    1.60
   7   7  -4   -0.21    1.35
  -7  -7   4   -1.13    1.50
  -7  -7   4   -0.67    1.46
   6   7  -4   -2.60    1.03
   6   7  -4   -0.48    1.07
   6   7  -4    0.14    1.22
  -6  -7   4   -0.54    1.19
  -6  -7   4    1.04    1.19
   5   7  -4   17.35    1.86
   5   7  -4   15.96    1.63
   5   7  -4   18.17    1.68
  -5  -7   4   20.32    1.86
  -5  -7   4   15.47    1.77
   4   7  -4    5.82    1.07
   4   7  -4    6.38    1.00
   4   7  -4    5.59    0.92
  -4  -7   4    6.25    1.12
  -4  -7   4    2.90    0.98
   3   7  -4   13.49    1.11
   3   7  -4   12.91    1.27
   3   7  -4   13.72    1.15
  -3  -7   4   12.21    1.34
  -3  -7   4   14.55    1.36
   2   7  -4    1.59    0.53
   2   7  -4    3.03    0.66
   2   7  -4    3.17    0.59
  -2  -7   4    1.30    0.65
  -2  -7   4    1.51    0.70
   1   7  -4   38.41    1.42
   1   7  -4   37.18    1.33
   1   7  -4   36.32    1.30
  -1  -7   4   36.67    1.64
  -1  -7   4   35.12    1.61
   0   7  -4    0.24    0.27
   0   7  -4    0.20    0.21
   0   7  -4    0.04    0.27
   0  -7   4   -0.02    0.41
   0  -7   4   -0.16    0.44
   1  -7   4    0.07    0.38
   1  -7   4    0.78    0.37
   2  -7   4   14.05    0.84
   2  -7   4   13.57    0.85
   2  -7   4   14.30    0.88
   3  -7   4    8.45    0.38
   3  -7   4    7.81    0.70
   3  -7   4    7.78    0.78
   3  -7   4    8.56    0.67
   4  -7   4   34.04    1.28
   4  -7   4   35.42    1.55
   4  -7   4   34.50    1.23
   4  -7   4   32.64    1.02
   5  -7   4   14.57    1.29
   5  -7   4   17.27    0.90
   5  -7   4   15.13    0.96
   5  -7   4   16.98    0.82
   6  -7   4   48.85    1.79
   6  -7   4   52.63    1.74
  -7   7  -4   -0.64    0.85
   7  -7   4   -0.46    0.62
   7  -7   4    1.57    0.59
  -8   7  -4    4.21    1.21
   8  -7   4    3.86    0.77
   8  -7   4    4.85    0.99
  -9   7  -4    1.10    1.43
   9  -7   4   -0.38    1.03
   9  -7   4    1.60    1.14
   9  -7   4    1.31    0.92
 -10   7  -4    1.32    1.82
  10  -7   4   -1.57    1.13
  10  -7   4    0.86    1.43
  10  -7   4    2.81    1.51
   9   6  -4   22.24    2.87
  -9  -6   4   17.59    3.32
   8   6  -4    3.19    1.52
   8   6  -4    3.43    1.65
   8   6  -4    0.85    1.50
  -8  -6   4   -1.85    1.53
  -8  -6   4    0.12    1.57
   7   6  -4   26.91    2.35
   7   6  -4   27.35    2.33
   7   6  -4   19.99    2.14
  -7  -6   4   23.44    2.27
  -7  -6   4   26.13    2.30
   6   6  -4    0.74    0.90
   6   6  -4    0.25    1.04
   6   6  -4   -0.44    0.96
  -6  -6   4    0.65    1.08
  -6  -6   4    2.09    1.12
   5   6  -4   27.99    1.81
   5   6  -4   29.73    1.77
   5   6  -4   30.86    1.91
  -5  -6   4   26.66    1.88
  -5  -6   4   31.69    1.95
   4   6  -4    3.27    0.77
   4   6  -4    2.69    0.81
   4   6  -4    2.59    0.79
  -4  -6   4    3.73    0.86
  -4  -6   4    2.25    0.81
   3   6  -4    7.73    0.94
   3   6  -4    6.55    0.82
   3   6  -4    6.64    0.86
  -3  -6   4    5.78    0.91
  -3  -6   4    6.86    0.94
   2   6  -4   38.56    1.53
   2   6  -4   35.20    1.93
   2   6  -4   38.37    1.46
  -2  -6   4   35.66    1.61
  -2  -6   4   37.28    1.67
   1   6  -4    0.23    0.33
   1   6  -4    0.56    0.37
  -1  -6   4    0.49    0.41
  -1  -6   4    0.30    0.38
   0   6  -4   70.30    1.68
   0   6  -4   67.72    1.75
   0   6  -4   69.36    1.65
   0  -6   4   72.07    2.09
   1  -6   4    0.58    0.18
   1  -6   4    0.15    0.29
   1  -6   4   -0.13    0.24
   2  -6   4   25.65    0.97
   2  -6   4   27.76    0.80
   2  -6   4   25.15    1.11
   3  -6   4    3.04    0.37
   3  -6   4    3.13    0.39
   3  -6   4    3.12    0.55
   3  -6   4    4.08    0.35
   4  -6   4   11.99    0.68
   4  -6   4   12.11    0.68
   4  -6   4   12.65    0.63
   4  -6   4   13.23    1.00
   5  -6   4    9.26    1.06
   5  -6   4    6.45    0.67
   5  -6   4    8.01    0.61
  -6   6  -4    0.33    0.61
   6  -6   4    0.09    0.33
  -7   6  -4   37.08    1.96
   7  -6   4   35.42    1.62
   7  -6   4   36.83    1.52
  -8   6  -4    0.69    1.01
   8  -6   4    0.82    0.78
   8  -6   4    0.40    0.59
  -9   6  -4   21.66    2.28
   9  -6   4   21.69    1.89
   9  -6   4   20.00    1.62
 -10   6  -4    0.79    1.61
  10  -6   4    0.63    1.37
  10  -6   4    1.98    1.44
  10  -6   4    1.21    1.12
   9   5  -4    0.80    1.81
   9   5  -4    1.56    1.61
   9   5  -4    0.79    1.63
  -9  -5   4    1.96    1.63
  -9  -5   4    4.23    1.82
   8   5  -4    1.09    1.17
   8   5  -4   -1.44    1.20
   8   5  -4    1.04    1.41
  -8  -5   4    0.53    1.32
  -8  -5   4    0.04    1.34
   7   5  -4    1.35    1.11
   7   5  -4    2.04    0.97
   7   5  -4    2.29    1.10
  -7  -5   4    1.74    1.07
  -7  -5   4    1.74    1.13
   6   5  -4    0.29    0.84
   6   5  -4   -0.03    0.76
   6   5  -4    0.49    0.87
  -6  -5   4    0.05    0.93
  -6  -5   4    1.17    0.84
   5   5  -4   12.70    1.25
   5   5  -4   13.99    1.41
   5   5  -4   12.44    1.18
  -5  -5   4   13.47    1.32
  -5  -5   4   13.51    1.37
   4   5  -4   18.59    1.29
   4   5  -4   20.37    1.28
   4   5  -4   20.34    1.28
  -4  -5   4   18.27    1.34
  -4  -5   4   20.87    1.42
   3   5  -4   10.30    0.92
   3   5  -4   10.47    0.94
   3   5  -4    9.91    0.80
  -3  -5   4    9.75    0.92
  -3  -5   4    8.74    0.90
   2   5  -4    6.67    0.72
   2   5  -4    7.43    0.71
   2   5  -4    5.94    0.59
  -2  -5   4    7.44    0.78
  -2  -5   4    6.15    0.72
   1   5  -4   21.58    0.86
   1   5  -4   22.60    0.94
   1   5  -4   21.96    0.94
  -1  -5   4   20.08    1.02
  -1  -5   4   20.10    1.02
   0   5  -4    2.94    0.26
   0   5  -4    3.52    0.33
   0   5  -4    2.47    0.35
   0  -5   4    2.76    0.42
   0  -5   4    2.94    0.36
   0  -5   4    2.47    0.40
   1  -5   4    0.55    0.22
   1  -5   4    0.29    0.22
   1  -5   4    0.36    0.18
   2  -5   4    1.14    0.23
   2  -5   4    0.28    0.33
   2  -5   4    1.00    0.22
   2  -5   4    1.02    0.22
   3  -5   4    6.62    0.37
   3  -5   4    6.16    0.46
   3  -5   4    6.45    0.40
   3  -5   4    6.40    0.68
   4  -5   4   27.29    0.87
   4  -5   4   26.87    0.90
   4  -5   4   26.25    1.29
  -5   5  -4    6.47    0.79
   5  -5   4    7.86    0.61
   5  -5   4    8.05    0.97
   5  -5   4    6.61    0.53
  -6   5  -4   11.32    1.07
   6  -5   4   12.79    0.79
   6  -5   4   12.73    0.90
  -7   5  -4    0.44    0.65
   7  -5   4   -0.05    0.43
   7  -5   4   -0.24    0.51
  -8   5  -4    2.28    0.92
   8  -5   4    0.99    0.75
   8  -5   4    0.16    0.54
  -9   5  -4    3.33    1.25
   9  -5   4    1.07    0.74
   9  -5   4    0.30    0.95
 -10   5  -4    1.21    1.41
  10  -5   4    0.33    1.23
  10  -5   4   -0.74    1.07
 -11   5  -4    1.65    2.35
  11  -5   4    6.31    1.84
  11  -5   4    1.75    2.02
  11  -5   4    2.28    1.52
  10   4  -4    3.15    2.14
 -10  -4   4   -0.83    2.14
 -10  -4   4   -3.67    2.18
   9   4  -4   18.25    2.20
   9   4  -4   20.41    2.50
   9   4  -4   21.04    2.28
  -9  -4   4   18.56    2.11
  -9  -4   4   21.79    2.40
   8   4  -4    1.11    1.22
   8   4  -4   -0.26    1.20
   8   4  -4    0.85    1.06
  -8  -4   4    1.39    1.13
  -8  -4   4    3.49    1.24
   7   4  -4   37.34    2.26
   7   4  -4   41.62    2.32
   7   4  -4   38.15    2.07
  -7  -4   4   36.59    2.15
  -7  -4   4   35.06    2.13
   6   4  -4   -1.12    0.74
   6   4  -4   -0.26    0.51
   6   4  -4   -0.28    0.57
  -6  -4   4    0.17    0.72
  -6  -4   4    1.21    0.79
   5   4  -4   31.89    1.68
   5   4  -4   32.87    1.73
   5   4  -4   34.20    1.68
  -5  -4   4   33.56    1.74
  -5  -4   4   32.09    1.68
   4   4  -4    6.87    0.77
   4   4  -4    6.75    0.86
   4   4  -4    6.78    0.86
  -4  -4   4    5.43    0.77
  -4  -4   4    6.10    0.83
   3   4  -4    9.18    0.85
   3   4  -4   10.98    0.86
   3   4  -4   10.35    0.76
  -3  -4   4    9.00    0.83
  -3  -4   4    9.71    0.86
   2   4  -4  203.62    4.43
   2   4  -4  195.21    4.35
   2   4  -4  191.83    4.38
  -2  -4   4  198.05    4.52
   1   4  -4    5.48    0.41
   1   4  -4    5.08    0.51
   1   4  -4    6.37    0.52
  -1  -4   4    6.10    0.54
  -1  -4   4    6.14    0.52
  -1  -4   4    5.94    0.47
   0   4  -4   62.17    1.37
   0   4  -4   62.58    1.59
   0   4  -4   62.73    1.39
   0  -4   4   65.07    1.61
   0  -4   4   61.67    1.60
   0  -4   4   61.34    1.62
   1  -4   4   14.42    0.59
   1  -4   4   14.27    0.51
   1  -4   4   13.95    0.51
   2  -4   4  117.58    2.55
   2  -4   4  111.36    2.21
   2  -4   4  110.71    2.23
   2  -4   4  119.58    2.81
   3  -4   4   -0.06    0.10
   3  -4   4    0.04    0.26
   3  -4   4   -0.03    0.08
  -4   4  -4   71.24    2.20
   4  -4   4   69.57    2.19
   4  -4   4   71.78    1.66
   4  -4   4   69.34    1.67
  -5   4  -4   48.04    1.83
   5  -4   4   49.36    1.48
   5  -4   4   49.63    1.43
   5  -4   4   49.43    1.94
  -6   4  -4    9.18    1.07
   6  -4   4   10.30    0.72
   6  -4   4    9.90    0.87
  -7   4  -4   74.65    2.80
   7  -4   4   73.63    2.37
   7  -4   4   75.48    2.31
  -8   4  -4    9.92    1.35
   8  -4   4    6.96    1.07
   8  -4   4    9.88    1.06
  -9   4  -4   39.18    2.49
   9  -4   4   41.50    1.96
   9  -4   4   39.44    2.30
 -10   4  -4    1.25    1.48
  10  -4   4   -0.02    1.02
  10  -4   4   -0.16    1.26
 -11   4  -4   16.66    2.66
  11  -4   4   20.25    2.13
  11  -4   4   21.29    2.43
  11  -4   4   17.19    2.42
  10   3  -4    0.78    1.67
 -10  -3   4    1.43    1.89
 -10  -3   4   -1.06    1.69
 -10  -3   4    1.61    1.58
   9   3  -4    8.52    1.53
   9   3  -4    7.37    1.70
   9   3  -4    8.47    1.77
  -9  -3   4    8.62    1.59
  -9  -3   4   10.72    1.70
   8   3  -4    0.59    1.06
   8   3  -4   -0.28    1.02
   8   3  -4    2.80    1.05
  -8  -3   4    0.86    0.99
  -8  -3   4    0.51    0.96
   7   3  -4    2.53    0.84
   7   3  -4    1.80    0.84
   7   3  -4    0.45    0.69
  -7  -3   4    1.74    0.87
  -7  -3   4    3.00    0.89
   6   3  -4    6.09    1.01
   6   3  -4    5.91    0.89
   6   3  -4    5.57    0.95
  -6  -3   4    6.25    0.97
  -6  -3   4    7.22    0.98
   5   3  -4    1.76    0.55
   5   3  -4    1.81    0.68
   5   3  -4    1.82    0.66
  -5  -3   4    0.69    0.52
  -5  -3   4    0.59    0.48
   4   3  -4    4.50    0.66
   4   3  -4    5.16    0.75
   4   3  -4    5.08    0.74
  -4  -3   4    3.16    0.64
  -4  -3   4    4.44    0.68
   3   3  -4   13.80    0.83
  -3  -3   4   13.29    0.88
  -3  -3   4   14.06    0.89
   2   3  -4    5.88    0.56
   2   3  -4    6.22    0.58
   2   3  -4    6.80    0.50
  -2  -3   4    5.35    0.56
  -2  -3   4    5.86    0.58
  -2  -3   4    6.41    0.56
   1   3  -4    0.00    0.13
   1   3  -4    0.14    0.20
   1   3  -4    0.06    0.23
  -1  -3   4   -0.17    0.19
  -1  -3   4    0.15    0.19
  -1  -3   4    0.00    0.20
   0   3  -4    1.07    0.24
   0   3  -4    0.82    0.12
   0  -3   4    0.58    0.19
   0  -3   4    0.65    0.17
   0  -3   4    0.55    0.19
   1  -3   4   21.51    0.74
   2  -3   4   26.86    1.04
  -3   3  -4   15.68    0.84
   3  -3   4   15.21    0.41
   3  -3   4   14.46    0.84
   3  -3   4   15.33    0.42
  -4   3  -4    5.61    0.64
   4  -3   4    6.22    0.39
   4  -3   4    5.32    0.41
   4  -3   4    5.56    0.71
  -5   3  -4   19.88    1.19
   5  -3   4   21.07    0.93
   5  -3   4   19.76    1.27
   5  -3   4   21.03    0.86
  -6   3  -4   13.63    1.13
   6  -3   4   14.47    0.86
   6  -3   4   13.13    0.91
  -7   3  -4    0.25    0.64
   7  -3   4    0.31    0.53
   7  -3   4   -0.04    0.45
  -8   3  -4    0.55    0.83
   8  -3   4    1.27    0.62
   8  -3   4    0.60    0.71
  -9   3  -4    0.45    1.13
   9  -3   4    0.38    1.00
   9  -3   4    0.74    0.81
 -10   3  -4    3.18    1.50
  10  -3   4    1.78    1.24
  10  -3   4    6.44    1.20
 -11   3  -4   -0.07    2.21
  11  -3   4    2.08    1.93
  11  -3   4    5.71    1.69
 -11  -2   4    9.76    2.31
 -11  -2   4    8.70    2.11
  10   2  -4   -2.76    1.52
  10   2  -4   -2.03    1.32
  10   2  -4   -1.22    1.55
 -10  -2   4    3.45    1.73
 -10  -2   4    1.23    1.53
 -10  -2   4    1.98    1.53
   9   2  -4   29.54    2.14
   9   2  -4   28.08    2.40
   9   2  -4   24.94    2.35
  -9  -2   4   27.38    2.32
  -9  -2   4   26.42    2.23
   8   2  -4   -0.17    0.94
   8   2  -4   -0.74    0.80
   8   2  -4    0.09    0.91
  -8  -2   4    0.25    0.94
  -8  -2   4    0.05    0.85
   7   2  -4   34.64    1.92
   7   2  -4   32.76    1.95
   7   2  -4   35.79    2.04
  -7  -2   4   34.31    1.89
  -7  -2   4   36.66    1.92
   6   2  -4    3.13    0.78
   6   2  -4    2.97    0.65
   6   2  -4    2.44    0.76
  -6  -2   4    0.59    0.64
  -6  -2   4    2.36    0.68
   5   2  -4   23.00    1.23
   5   2  -4   21.63    1.29
   5   2  -4   22.72    1.33
  -5  -2   4   21.53    1.25
  -5  -2   4   22.34    1.28
   4   2  -4    2.10    0.52
   4   2  -4    1.19    0.44
   4   2  -4    1.64    0.46
  -4  -2   4    1.48    0.47
  -4  -2   4    2.01    0.50
   3   2  -4    1.03    0.31
   3   2  -4    1.32    0.40
   3   2  -4    1.14    0.38
  -3  -2   4    1.14    0.40
  -3  -2   4    1.18    0.35
   2   2  -4  259.25    5.36
   2   2  -4  253.16    5.31
   2   2  -4  262.97    5.41
  -2  -2   4  261.33    5.40
  -2  -2   4  250.74    5.34
  -2  -2   4  257.70    5.40
   1   2  -4  126.67    2.82
   1   2  -4  128.44    2.74
   1   2  -4  127.92    2.71
  -1  -2   4  127.29    2.78
  -1  -2   4  123.26    2.81
  -1  -2   4  123.34    2.74
   0   2  -4   69.62    1.42
   0   2  -4   69.97    1.43
   0   2  -4   73.53    1.73
   0  -2   4   71.53    1.55
   0  -2   4   74.73    1.73
   0  -2   4   72.33    1.56
   1  -2   4    7.32    0.44
  -2   2  -4  122.91    2.85
   2  -2   4  118.62    2.84
  -3   2  -4   -0.20    0.22
   3  -2   4    0.26    0.29
   3  -2   4    0.11    0.11
   3  -2   4   -0.05    0.12
  -4   2  -4   36.99    1.44
   4  -2   4   33.96    1.10
   4  -2   4   35.32    1.08
   4  -2   4   34.71    1.46
  -5   2  -4   39.86    1.00
  -5   2  -4   39.77    0.99
  -5   2  -4   38.70    1.65
   5  -2   4   38.79    1.36
   5  -2   4   41.61    1.36
  -6   2  -4    0.82    0.55
  -6   2  -4    0.14    0.21
  -6   2  -4    0.90    0.27
   6  -2   4    0.66    0.44
   6  -2   4    1.21    0.40
  -7   2  -4   39.47    1.24
  -7   2  -4   36.83    1.26
  -7   2  -4   38.73    2.01
   7  -2   4   40.09    1.78
   7  -2   4   42.70    1.72
  -8   2  -4   -0.35    0.84
  -8   2  -4    0.44    0.45
  -8   2  -4    0.10    0.36
   8  -2   4   -0.86    0.62
   8  -2   4    0.66    0.65
  -9   2  -4   23.74    1.14
  -9   2  -4   22.82    1.25
  -9   2  -4   24.49    2.14
   9  -2   4   25.98    1.92
 -10   2  -4    2.91    0.76
 -10   2  -4    3.56    0.73
 -10   2  -4    1.72    1.46
  10  -2   4    5.53    1.41
  10  -2   4    2.97    1.17
 -11   2  -4    8.18    2.34
  11  -2   4   11.00    1.97
  11  -2   4    6.83    1.97
  11   1  -4   10.95    2.14
 -11  -1   4    9.67    2.65
 -11  -1   4    9.77    2.08
 -11  -1   4    8.04    2.01
  10   1  -4   -1.15    1.31
  10   1  -4    0.11    1.54
  10   1  -4    0.70    1.44
 -10  -1   4    1.77    1.47
 -10  -1   4    0.33    1.38
 -10  -1   4    1.00    1.60
   9   1  -4    4.90    1.42
   9   1  -4    5.51    1.19
   9   1  -4    4.29    1.36
  -9  -1   4    4.32    1.23
  -9  -1   4    2.22    1.10
   8   1  -4    2.18    0.87
   8   1  -4    4.12    1.12
   8   1  -4    2.01    0.93
  -8  -1   4    2.30    0.98
  -8  -1   4    3.81    1.20
   7   1  -4    1.69    0.67
   7   1  -4    1.91    0.79
   7   1  -4    1.56    0.67
  -7  -1   4    1.39    0.70
  -7  -1   4    0.34    0.61
   6   1  -4   21.06    1.40
   6   1  -4   20.52    1.28
   6   1  -4   18.73    1.24
  -6  -1   4   18.03    1.22
  -6  -1   4   19.83    1.29
   5   1  -4    4.73    0.73
   5   1  -4    5.16    0.78
   5   1  -4    4.77    0.67
  -5  -1   4    4.76    0.72
  -5  -1   4    5.22    0.71
   4   1  -4   80.99    2.36
   4   1  -4   79.14    2.34
   4   1  -4   75.44    2.24
  -4  -1   4   76.34    2.28
  -4  -1   4   79.69    2.29
   3   1  -4    4.70    0.57
   3   1  -4    4.28    0.55
   3   1  -4    4.23    0.50
  -3  -1   4    4.97    0.53
  -3  -1   4    3.57    0.48
  -3  -1   4    3.73    0.51
   2   1  -4  206.85    4.38
   2   1  -4  205.93    4.31
   2   1  -4  202.63    4.34
  -2  -1   4  202.07    4.35
  -2  -1   4  207.89    4.38
  -2  -1   4  202.62    4.32
   1   1  -4    2.44    0.32
   1   1  -4    2.31    0.28
   1   1  -4    2.32    0.34
  -1  -1   4    2.31    0.32
  -1  -1   4    3.06    0.33
  -1  -1   4    2.34    0.32
   0   1  -4   11.38    0.54
   0   1  -4   11.03    0.39
   0   1  -4   11.11    0.37
   0  -1   4   11.42    0.42
   0  -1   4   11.36    0.50
   0  -1   4   11.24    0.42
   1  -1   4   12.83    0.38
   1  -1   4   12.97    0.38
   1  -1   4   13.46    0.61
  -2   1  -4   27.65    0.98
  -2   1  -4   24.63    0.56
   2  -1   4   25.71    0.71
   2  -1   4   25.45    0.73
   2  -1   4   28.17    1.01
  -3   1  -4   34.72    0.92
  -3   1  -4   38.07    1.34
  -3   1  -4   36.84    0.94
   3  -1   4   38.26    1.37
   3  -1   4   38.65    1.08
   3  -1   4   35.05    1.08
  -4   1  -4   14.73    0.61
  -4   1  -4   14.30    0.91
  -4   1  -4   14.08    0.62
   4  -1   4   14.43    0.73
   4  -1   4   14.45    0.96
   4  -1   4   13.34    0.74
  -5   1  -4   24.92    0.93
  -5   1  -4   23.70    1.28
  -5   1  -4   23.29    0.93
   5  -1   4   23.80    1.07
  -6   1  -4    3.08    0.43
  -6   1  -4    1.89    0.43
  -6   1  -4    2.74    0.70
   6  -1   4    2.48    0.53
   6  -1   4    2.00    0.59
  -7   1  -4    1.11    0.44
  -7   1  -4    1.28    0.74
   7  -1   4    0.68    0.58
   7  -1   4    1.49    0.58
  -8   1  -4    3.32    1.10
  -8   1  -4    4.94    0.77
  -8   1  -4    5.05    0.68
   8  -1   4    5.43    0.95
   8  -1   4    3.92    1.16
  -9   1  -4    0.28    0.74
  -9   1  -4   -0.72    1.02
  -9   1  -4    0.59    0.63
   9  -1   4    0.87    0.91
   9  -1   4    2.05    1.15
 -10   1  -4   14.63    2.13
 -10   1  -4   21.58    1.50
 -10   1  -4   17.11    1.72
  10  -1   4   21.96    2.44
  10  -1   4   22.30    2.06
 -11   1  -4   -1.27    1.09
 -11   1  -4   -1.03    1.08
 -11   1  -4    1.07    2.23
  11  -1   4    0.16    1.62
  11  -1   4    0.54    1.77
  11   0  -4   24.04    2.98
 -11   0   4   20.69    2.40
 -11   0   4   21.82    3.03
 -11   0   4   19.07    2.22
  10   0  -4    2.53    1.51
  10   0  -4    0.66    1.45
  10   0  -4   -0.34    1.17
 -10   0   4    0.63    1.38
 -10   0   4    0.08    1.32
 -10   0   4   -0.58    1.33
   9   0  -4   33.89    2.35
   9   0  -4   35.98    2.22
   9   0  -4   36.90    2.44
  -9   0   4   35.26    2.14
  -9   0   4   34.32    2.11
   8   0  -4    0.32    0.81
   8   0  -4   -0.04    0.69
   8   0  -4    1.31    0.88
  -8   0   4    0.71    0.74
   7   0  -4   42.17    2.06
   7   0  -4   42.03    1.91
   7   0  -4   39.77    2.04
  -7   0   4   41.77    1.92
  -7   0   4   41.58    1.92
   6   0  -4    2.91    0.68
   6   0  -4    1.85    0.65
   6   0  -4    2.27    0.62
  -6   0   4    1.87    0.65
  -6   0   4    1.34    0.48
   5   0  -4    5.01    0.68
   5   0  -4    4.01    0.66
   5   0  -4    4.54    0.72
  -5   0   4    5.12    0.69
  -5   0   4    5.80    0.67
   4   0  -4   48.51    2.51
   4   0  -4   53.24    1.71
   4   0  -4   51.95    1.80
  -4   0   4   53.75    1.74
  -4   0   4   49.63    1.90
   3   0  -4    1.82    0.44
   3   0  -4    1.75    0.36
   3   0  -4    2.35    0.40
  -3   0   4    1.71    0.32
  -3   0   4    1.91    0.39
  -3   0   4    1.69    0.37
   2   0  -4   35.21    1.11
   2   0  -4   32.93    1.14
   2   0  -4   35.99    1.15
  -2   0   4   36.81    1.13
  -2   0   4   33.92    1.11
  -2   0   4   35.53    1.14
   1   0  -4   72.93    1.74
   1   0  -4   73.62    1.77
   1   0  -4   72.16    1.76
  -1   0   4   75.78    1.77
  -1   0   4   74.28    1.77
  -1   0   4   72.92    1.75
   0   0  -4   21.32    0.72
   0   0  -4   21.01    0.66
   0   0  -4   21.18    0.69
   0   0   4   20.29    0.68
   0   0   4   21.38    0.72
   0   0   4   21.35    0.70
  -1   0  -4    0.07    0.13
  -1   0  -4    0.09    0.19
  -1   0  -4    0.08    0.15
   1   0   4    0.15    0.22
   1   0   4    0.06    0.18
   1   0   4    0.07    0.14
  -2   0  -4   99.08    2.22
  -2   0  -4  100.73    2.21
  -2   0  -4   98.97    2.41
   2   0   4   99.31    2.42
   2   0   4   98.68    2.24
   2   0   4   97.94    2.28
  -3   0  -4    4.71    0.44
  -3   0  -4    4.57    0.39
  -3   0  -4    5.53    0.57
   3   0   4    5.31    0.60
   3   0   4    4.48    0.44
   3   0   4    4.74    0.51
  -4   0  -4    3.36    0.42
  -4   0  -4    3.06    0.42
  -4   0  -4    2.54    0.52
   4   0   4    3.53    0.48
   4   0   4    3.20    0.49
  -5   0  -4   52.62    1.99
  -5   0  -4   49.95    1.63
  -5   0  -4   53.65    1.69
   5   0   4   51.53    1.81
   5   0   4   55.81    1.82
  -6   0  -4    0.69    0.56
  -6   0  -4    0.09    0.41
  -6   0  -4    0.26    0.37
   6   0   4    0.26    0.51
   6   0   4    0.42    0.44
  -7   0  -4   58.22    2.44
  -7   0  -4   53.48    1.97
  -7   0  -4   53.60    1.97
   7   0   4   53.94    2.17
   7   0   4   52.74    2.22
  -8   0  -4    2.84    0.85
  -8   0  -4    2.15    0.74
  -8   0  -4    2.52    1.03
   8   0   4    3.17    0.98
   8   0   4    3.14    0.87
  -9   0  -4   20.80    2.13
  -9   0  -4   19.27    1.62
  -9   0  -4   22.28    1.61
   9   0   4   17.72    1.96
   9   0   4   25.77    1.97
 -10   0  -4   -3.53    1.36
 -10   0  -4    0.31    1.03
  10   0   4   -1.32    1.17
  10   0   4    0.40    1.39
 -11   0  -4    2.41    2.47
 -11   0  -4    8.45    1.50
 -11   0  -4    4.03    1.47
  11   0   4    2.40    1.80
  11  -1  -4   21.92    3.82
  11  -1  -4   14.05    2.06
 -11   1   4   14.97    2.16
 -11   1   4    9.90    1.81
 -11   1   4   18.09    2.80
  10  -1  -4    1.85    1.31
  10  -1  -4    1.28    1.14
  10  -1  -4    0.75    1.50
 -10   1   4    1.08    1.14
 -10   1   4    1.34    1.51
 -10   1   4    0.12    1.31
   9  -1  -4    4.60    1.18
   9  -1  -4    2.63    1.22
   9  -1  -4    3.85    1.07
  -9   1   4    2.73    1.14
  -9   1   4    3.09    1.13
   8  -1  -4    2.54    1.02
   8  -1  -4    2.72    0.94
  -8   1   4    1.40    0.83
  -8   1   4    1.46    0.74
   7  -1  -4    4.00    0.83
   7  -1  -4    4.60    0.95
   7  -1  -4    2.17    0.73
  -7   1   4    3.27    0.80
  -7   1   4    3.13    0.78
   6  -1  -4   38.90    1.77
   6  -1  -4   35.58    1.62
   6  -1  -4   38.72    1.73
  -6   1   4   36.54    1.58
  -6   1   4   39.03    1.62
   5  -1  -4    6.56    0.81
   5  -1  -4    6.73    0.67
   5  -1  -4    7.31    0.72
  -5   1   4    6.66    0.71
  -5   1   4    5.96    0.74
   4  -1  -4   87.88    2.36
   4  -1  -4   79.92    2.31
   4  -1  -4   88.41    2.75
  -4   1   4   81.44    2.28
  -4   1   4   80.73    2.29
   3  -1  -4    0.17    0.24
   3  -1  -4    0.00    0.25
   3  -1  -4    0.82    0.35
  -3   1   4   -0.38    0.23
  -3   1   4    0.42    0.26
  -3   1   4    0.78    0.31
   2  -1  -4    7.35    0.53
   2  -1  -4    8.24    0.58
   2  -1  -4    7.69    0.53
  -2   1   4    8.01    0.56
  -2   1   4    8.33    0.49
  -2   1   4    8.96    0.56
   1  -1  -4    4.03    0.44
   1  -1  -4    4.52    0.40
   1  -1  -4    4.45    0.38
  -1   1   4    4.17    0.34
  -1   1   4    4.46    0.39
  -1   1   4    4.56    0.38
   0  -1  -4    1.33    0.25
   0   1   4    0.93    0.28
   0   1   4    0.82    0.22
   0   1   4    0.76    0.21
  -1  -1  -4   31.02    1.00
  -1  -1  -4   29.78    0.98
  -1  -1  -4   30.45    0.93
   1   1   4   30.30    0.99
   1   1   4   29.43    0.99
   1   1   4   29.35    0.94
  -2  -1  -4    4.70    0.45
  -2  -1  -4    3.51    0.42
  -2  -1  -4    5.01    0.44
   2   1   4    4.43    0.44
   2   1   4    4.44    0.50
   2   1   4    4.35    0.47
  -3  -1  -4   42.38    1.39
  -3  -1  -4   43.71    1.39
  -3  -1  -4   42.11    1.45
   3   1   4   43.28    1.43
   3   1   4   41.08    1.44
  -4  -1  -4    0.15    0.30
  -4  -1  -4    0.82    0.36
  -4  -1  -4    1.05    0.39
   4   1   4    0.80    0.40
   4   1   4    0.97    0.36
  -5  -1  -4   12.55    1.00
  -5  -1  -4   13.15    0.95
  -5  -1  -4   13.68    0.95
   5   1   4   15.69    0.99
   5   1   4   14.07    1.05
  -6  -1  -4    2.24    0.71
  -6  -1  -4    1.99    0.62
  -6  -1  -4    1.59    0.58
   6   1   4    2.23    0.63
   6   1   4    1.79    0.66
  -7  -1  -4    8.73    1.19
  -7  -1  -4    8.87    1.02
  -7  -1  -4   10.09    1.10
   7   1   4    8.04    1.04
  -8  -1  -4    7.58    1.13
  -8  -1  -4    7.64    1.06
  -8  -1  -4    7.31    1.26
   8   1   4    6.47    1.20
   8   1   4    5.47    1.09
  -9  -1  -4   -0.77    1.03
  -9  -1  -4    0.39    1.27
   9   1   4    0.84    1.19
   9   1   4    1.33    1.07
 -10  -1  -4   20.12    2.06
 -10  -1  -4   15.99    2.16
 -10  -1  -4   19.50    2.24
  10   1   4   23.67    2.33
  10   1   4   22.42    2.46
 -11  -1  -4    5.59    1.75
 -11  -1  -4    2.14    1.71
  11   1   4    0.80    1.97
  11  -2  -4   16.27    2.15
  11  -2  -4   13.45    3.23
  11  -2  -4   16.12    2.16
 -11   2   4   14.11    1.98
 -11   2   4   14.15    2.54
 -11   2   4   16.58    1.83
  10  -2  -4    0.60    1.23
  10  -2  -4   -0.42    1.33
  10  -2  -4    0.10    1.26
 -10   2   4    1.27    1.14
 -10   2   4    0.50    1.29
 -10   2   4    2.23    1.32
   9  -2  -4   35.77    2.31
   9  -2  -4   37.16    2.36
   9  -2  -4   36.44    2.15
  -9   2   4   38.11    2.45
  -9   2   4   34.34    2.12
  -9   2   4   31.97    1.97
   8  -2  -4    1.90    0.88
   8  -2  -4    1.30    0.93
   8  -2  -4    0.88    0.71
  -8   2   4    2.55    0.76
  -8   2   4    1.90    0.87
   7  -2  -4   21.50    1.51
   7  -2  -4   20.72    1.40
   7  -2  -4   24.10    1.49
  -7   2   4   21.15    1.32
  -7   2   4   21.13    1.39
   6  -2  -4    1.43    0.61
   6  -2  -4    1.89    0.60
   6  -2  -4    1.50    0.54
  -6   2   4    1.44    0.56
  -6   2   4    0.75    0.44
   5  -2  -4   17.54    1.07
   5  -2  -4   15.01    0.95
   5  -2  -4   16.85    1.06
  -5   2   4   15.01    0.99
  -5   2   4   17.45    0.96
   4  -2  -4   30.63    1.22
   4  -2  -4   28.65    1.25
   4  -2  -4   28.70    1.27
  -4   2   4   29.28    1.19
  -4   2   4   29.02    1.18
   3  -2  -4   11.70    0.76
   3  -2  -4   13.33    0.72
   3  -2  -4   13.26    0.75
  -3   2   4   12.03    0.69
  -3   2   4   13.45    0.66
  -3   2   4   13.11    0.75
   2  -2  -4   94.25    2.39
   2  -2  -4   97.08    2.20
   2  -2  -4   94.83    2.36
  -2   2   4   93.42    2.35
  -2   2   4   92.35    2.17
  -2   2   4   95.20    2.35
   1  -2  -4    1.51    0.36
   1  -2  -4    1.66    0.27
   1  -2  -4    1.63    0.31
  -1   2   4    1.62    0.22
  -1   2   4    1.57    0.34
  -1   2   4    2.00    0.32
   0  -2  -4  189.26    4.07
   0  -2  -4  185.96    4.03
   0   2   4  179.87    3.67
   0   2   4  186.10    3.84
   0   2   4  191.02    4.08
   0   2   4  191.28    4.06
  -1  -2  -4   10.87    0.51
  -1  -2  -4   10.18    0.65
  -1  -2  -4   11.00    0.67
   1   2   4   10.65    0.70
   1   2   4   10.71    0.53
   1   2   4   10.39    0.63
  -2  -2  -4   52.42    1.65
  -2  -2  -4   53.24    1.53
  -2  -2  -4   51.87    1.62
   2   2   4   52.88    1.68
   2   2   4   55.06    1.67
  -3  -2  -4   19.60    0.96
  -3  -2  -4   22.26    1.05
   3   2   4   20.25    1.06
   3   2   4   20.47    1.02
  -4  -2  -4    4.22    0.60
  -4  -2  -4    3.75    0.57
  -4  -2  -4    3.04    0.54
   4   2   4    3.61    0.66
   4   2   4    2.47    0.53
  -5  -2  -4   13.62    1.03
  -5  -2  -4   14.53    1.10
  -5  -2  -4   15.12    1.12
   5   2   4   14.04    1.07
   5   2   4   17.49    1.23
  -6  -2  -4    0.04    0.52
  -6  -2  -4   -0.47    0.53
  -6  -2  -4   -0.66    0.61
   6   2   4   -0.68    0.51
   6   2   4    0.37    0.63
  -7  -2  -4   41.08    1.96
  -7  -2  -4   39.07    2.08
  -7  -2  -4   35.08    1.88
   7   2   4   35.06    2.02
  -8  -2  -4    5.46    1.33
  -8  -2  -4    5.95    1.17
  -8  -2  -4    7.12    1.26
   8   2   4    6.31    1.17
   8   2   4    6.53    1.32
  -9  -2  -4    8.20    1.40
  -9  -2  -4    6.18    1.53
  -9  -2  -4   10.77    1.61
   9   2   4   11.07    1.79
   9   2   4    8.72    1.48
 -10  -2  -4    0.54    1.69
 -10  -2  -4   -3.91    1.66
 -10  -2  -4    1.18    1.39
  10   2   4   -0.23    1.35
  10   2   4    1.88    1.73
  11  -3  -4   15.31    2.36
  11  -3  -4   15.48    3.26
  11  -3  -4   19.86    2.37
 -11   3   4   12.56    2.50
 -11   3   4   22.72    2.21
 -11   3   4   20.03    2.20
  10  -3  -4   -0.33    1.35
  10  -3  -4   -2.39    1.11
  10  -3  -4    0.54    1.40
 -10   3   4    0.43    0.99
 -10   3   4   -2.29    1.31
 -10   3   4    0.15    1.31
   9  -3  -4   24.10    2.02
   9  -3  -4   26.03    2.17
   9  -3  -4   23.99    1.84
  -9   3   4   24.92    2.05
  -9   3   4   24.78    1.85
  -9   3   4   22.17    1.62
   8  -3  -4    6.95    1.18
   8  -3  -4    3.53    1.42
   8  -3  -4    6.08    1.25
  -8   3   4    3.60    0.79
  -8   3   4    5.36    1.26
  -8   3   4    5.59    0.97
   7  -3  -4    0.50    0.60
   7  -3  -4    1.12    0.75
   7  -3  -4    0.21    0.56
  -7   3   4    0.35    0.70
  -7   3   4    0.02    0.59
  -7   3   4    0.34    0.50
   6  -3  -4   45.51    1.82
   6  -3  -4   46.29    1.93
   6  -3  -4   40.14    1.75
  -6   3   4   45.52    1.72
  -6   3   4   44.55    1.72
   5  -3  -4    3.12    0.60
   5  -3  -4    2.16    0.49
   5  -3  -4    2.11    0.51
  -5   3   4    2.05    0.52
  -5   3   4    2.47    0.50
   4  -3  -4   84.99    2.51
   4  -3  -4   91.48    2.51
   4  -3  -4   85.34    2.30
  -4   3   4   92.33    2.42
  -4   3   4   87.57    2.42
   3  -3  -4    2.60    0.42
   3  -3  -4    2.36    0.47
   3  -3  -4    2.73    0.39
  -3   3   4    3.11    0.45
  -3   3   4    3.37    0.37
  -3   3   4    2.80    0.48
   2  -3  -4   43.76    1.46
   2  -3  -4   41.89    1.47
   2  -3  -4   44.24    1.19
  -2   3   4   43.57    1.40
  -2   3   4   45.61    1.18
  -2   3   4   41.43    1.41
   1  -3  -4   11.65    0.69
   1  -3  -4   10.59    0.71
  -1   3   4   11.95    0.48
  -1   3   4   11.65    0.75
  -1   3   4   11.41    0.68
   0  -3  -4    0.29    0.29
   0  -3  -4    0.14    0.25
   0   3   4    0.05    0.15
   0   3   4    0.01    0.30
   0   3   4    0.10    0.22
  -1  -3  -4   62.17    1.90
  -1  -3  -4   62.15    1.87
  -1  -3  -4   61.33    1.51
   1   3   4   61.84    1.84
   1   3   4   61.10    1.89
  -2  -3  -4    1.46    0.36
  -2  -3  -4    1.69    0.32
  -2  -3  -4    1.46    0.41
   2   3   4    1.86    0.48
   2   3   4    2.60    0.49
  -3  -3  -4   80.22    2.43
  -3  -3  -4   78.71    2.23
  -3  -3  -4   80.65    2.41
   3   3   4   81.78    2.43
   3   3   4   78.64    2.46
  -4  -3  -4    1.20    0.44
  -4  -3  -4    1.06    0.54
  -4  -3  -4    0.77    0.46
   4   3   4    1.96    0.54
   4   3   4    1.26    0.58
  -5  -3  -4   64.30    2.34
  -5  -3  -4   61.60    2.27
  -5  -3  -4   61.79    2.26
   5   3   4   60.12    2.30
   5   3   4   60.90    2.37
  -6  -3  -4    2.35    0.81
  -6  -3  -4    2.18    0.75
  -6  -3  -4    0.11    0.68
   6   3   4    1.52    0.67
   6   3   4    1.41    0.82
  -7  -3  -4    3.47    1.26
  -7  -3  -4    6.58    1.12
   7   3   4    3.51    1.05
   7   3   4    5.85    1.17
  -8  -3  -4   14.73    1.64
  -8  -3  -4   14.78    1.81
  -8  -3  -4   13.55    1.58
   8   3   4   14.81    1.74
   8   3   4   10.35    1.59
  -9  -3  -4    0.41    1.40
  -9  -3  -4    1.26    1.41
  -9  -3  -4    0.28    1.41
   9   3   4    2.09    1.55
   9   3   4    1.20    1.30
 -10  -3  -4   25.42    2.91
 -10  -3  -4   17.99    2.25
 -10  -3  -4   20.49    2.79
  10   3   4   21.49    2.64
  11  -4  -4   11.75    2.16
  11  -4  -4   15.24    2.28
 -11   4   4    7.52    1.25
 -11   4   4    9.38    2.34
  10  -4  -4    1.30    1.28
  10  -4  -4    1.94    1.47
  10  -4  -4    3.08    1.75
 -10   4   4    0.40    1.13
 -10   4   4    2.08    0.93
 -10   4   4    0.43    1.55
   9  -4  -4   22.36    1.97
   9  -4  -4   22.28    2.25
   9  -4  -4   19.80    1.77
  -9   4   4   25.74    1.80
  -9   4   4   21.00    1.47
  -9   4   4   21.47    2.07
   8  -4  -4   -0.13    0.79
   8  -4  -4    0.92    0.91
  -8   4   4    0.30    0.75
  -8   4   4    1.37    0.86
  -8   4   4   -0.35    0.57
   7  -4  -4    7.50    1.12
   7  -4  -4    8.89    1.08
   7  -4  -4    9.61    1.12
  -7   4   4    6.88    0.82
  -7   4   4    9.48    1.06
  -7   4   4    6.96    1.06
   6  -4  -4    4.19    0.73
   6  -4  -4    4.42    0.76
   6  -4  -4    5.26    0.87
  -6   4   4    5.83    0.72
  -6   4   4    4.03    0.67
  -6   4   4    3.90    0.68
   5  -4  -4    4.45    0.67
   5  -4  -4    3.99    0.60
   5  -4  -4    3.30    0.68
  -5   4   4    4.83    0.62
  -5   4   4    3.74    0.59
   4  -4  -4   18.28    0.88
   4  -4  -4   18.44    1.04
   4  -4  -4   17.79    1.12
  -4   4   4   19.08    0.90
  -4   4   4   19.07    0.99
  -4   4   4   17.54    1.00
   3  -4  -4    7.14    0.78
   3  -4  -4    7.19    0.50
   3  -4  -4    6.40    0.66
  -3   4   4    5.97    0.59
  -3   4   4    6.56    0.45
  -3   4   4    5.76    0.65
   2  -4  -4  107.50    2.37
   2  -4  -4  113.45    2.92
   2  -4  -4  112.07    2.91
  -2   4   4  111.34    2.36
  -2   4   4  107.40    2.24
  -2   4   4  110.71    2.82
  -2   4   4  110.79    2.79
   1  -4  -4   47.68    1.65
  -1   4   4   46.79    1.17
  -1   4   4   48.09    1.57
  -1   4   4   46.94    1.60
   0  -4  -4   31.17    1.31
   0  -4  -4   29.54    1.27
   0   4   4   29.43    1.22
   0   4   4   28.81    1.85
   0   4   4   28.77    0.91
  -1  -4  -4    6.90    0.72
  -1  -4  -4    7.65    0.75
  -1  -4  -4    7.90    0.42
   1   4   4    7.13    0.73
  -2  -4  -4   25.84    1.28
  -2  -4  -4   25.94    1.27
  -2  -4  -4   27.58    1.02
   2   4   4   25.21    1.31
   2   4   4   27.72    1.28
  -3  -4  -4   39.97    1.48
  -3  -4  -4   44.41    1.82
  -3  -4  -4   43.19    1.77
   3   4   4   42.41    1.73
   3   4   4   40.66    1.77
  -4  -4  -4    1.40    0.63
  -4  -4  -4    1.56    0.68
  -4  -4  -4    1.17    0.48
   4   4   4    1.29    0.56
   4   4   4    0.88    0.66
  -5  -4  -4   18.74    1.53
  -5  -4  -4   18.67    1.42
  -5  -4  -4   19.30    1.35
   5   4   4   18.37    1.37
   5   4   4   19.10    1.45
  -6  -4  -4    0.41    0.73
  -6  -4  -4    1.48    0.86
  -6  -4  -4    0.11    0.80
   6   4   4    1.60    0.91
   6   4   4    0.86    0.74
  -7  -4  -4   14.96    1.78
  -7  -4  -4   11.75    1.49
  -7  -4  -4   11.54    1.42
   7   4   4   11.37    1.44
   7   4   4   11.84    1.66
  -8  -4  -4   -1.16    1.11
  -8  -4  -4    0.16    1.21
  -8  -4  -4    1.61    1.28
   8   4   4   -0.34    1.31
   8   4   4   -0.17    1.04
  -9  -4  -4    8.11    1.91
  -9  -4  -4    7.00    1.85
  -9  -4  -4    8.42    1.84
   9   4   4   10.20    1.85
   9   4   4   10.00    2.02
 -10  -4  -4    5.90    2.44
 -10  -4  -4    5.22    2.50
 -10  -4  -4    2.54    2.11
  11  -5  -4   11.96    2.18
  11  -5  -4   10.10    2.17
 -11   5   4    8.24    2.43
  10  -5  -4    4.68    1.57
  10  -5  -4    7.50    1.61
  10  -5  -4    5.72    1.85
 -10   5   4    7.41    1.63
 -10   5   4    5.36    0.95
 -10   5   4    4.62    1.05
   9  -5  -4   15.18    1.83
   9  -5  -4   12.08    1.58
   9  -5  -4   14.53    1.74
  -9   5   4   13.64    1.68
  -9   5   4   15.86    1.25
  -9   5   4   16.75    1.48
   8  -5  -4    3.53    0.94
   8  -5  -4    2.43    1.12
   8  -5  -4    2.43    0.95
  -8   5   4    2.96    0.88
  -8   5   4    5.39    0.71
  -8   5   4    3.89    0.86
   7  -5  -4    0.91    0.74
   7  -5  -4    2.13    0.89
   7  -5  -4    2.13    0.75
  -7   5   4    0.11    0.64
  -7   5   4    1.75    0.67
  -7   5   4    0.50    0.48
   6  -5  -4   48.53    2.01
   6  -5  -4   47.56    2.13
   6  -5  -4   45.73    1.75
  -6   5   4   47.19    1.67
  -6   5   4   48.19    1.92
  -6   5   4   47.57    1.83
   5  -5  -4    2.97    0.60
   5  -5  -4    3.22    0.52
   5  -5  -4    3.64    0.72
  -5   5   4    2.57    0.51
  -5   5   4    3.59    0.54
   4  -5  -4   42.95    1.76
   4  -5  -4   44.41    1.74
   4  -5  -4   41.53    1.30
  -4   5   4   42.36    1.51
  -4   5   4   42.58    1.62
  -4   5   4   43.38    1.36
   3  -5  -4    0.26    0.46
   3  -5  -4    0.37    0.21
   3  -5  -4    0.32    0.39
  -3   5   4    0.87    0.47
  -3   5   4   -0.34    0.31
  -3   5   4    0.51    0.18
   2  -5  -4   40.00    1.60
   2  -5  -4   39.49    1.59
  -2   5   4   36.33    2.11
  -2   5   4   41.25    1.47
   1  -5  -4    7.96    0.77
   1  -5  -4    7.18    0.78
  -1   5   4    7.03    0.79
  -1   5   4    7.41    0.34
  -1   5   4    7.66    0.68
   0  -5  -4    5.88    0.76
   0  -5  -4    6.54    0.73
   0   5   4    6.29    0.71
   0   5   4    6.40    0.74
   0   5   4    6.41    0.41
  -1  -5  -4   31.12    1.48
  -1  -5  -4   30.63    0.89
  -1  -5  -4   33.11    1.55
   1   5   4   30.88    1.40
   1   5   4   31.29    1.46
  -2  -5  -4    0.36    0.29
  -2  -5  -4   -0.05    0.42
  -2  -5  -4    0.80    0.47
   2   5   4   -0.14    0.39
   2   5   4    0.44    0.51
  -3  -5  -4   80.98    2.82
  -3  -5  -4   84.96    2.81
  -3  -5  -4   81.01    2.34
   3   5   4   85.77    2.77
   3   5   4   81.25    2.78
  -4  -5  -4   -0.21    0.67
  -4  -5  -4   -0.03    0.62
  -4  -5  -4    0.44    0.53
   4   5   4    1.30    0.63
  -5  -5  -4   13.38    1.28
  -5  -5  -4   14.64    1.48
  -5  -5  -4   13.91    1.50
   5   5   4   13.76    1.37
   5   5   4   12.13    1.46
  -6  -5  -4    0.54    0.96
  -6  -5  -4    0.23    0.90
  -6  -5  -4    1.81    0.84
   6   5   4    0.00    0.88
   6   5   4   -0.65    0.96
  -7  -5  -4    3.57    1.27
  -7  -5  -4    2.87    1.28
  -7  -5  -4    3.56    1.09
   7   5   4    0.66    1.25
   7   5   4    2.55    1.09
  -8  -5  -4   19.69    2.51
  -8  -5  -4   16.86    2.17
  -8  -5  -4   15.42    2.07
   8   5   4   20.31    2.26
   8   5   4   12.55    2.07
  -9  -5  -4    1.95    1.92
  -9  -5  -4    3.27    1.99
  -9  -5  -4    4.40    2.15
   9   5   4    2.94    2.20
  10  -6  -4    1.77    1.42
  10  -6  -4   -3.09    1.46
  10  -6  -4   -3.40    1.74
 -10   6   4    2.12    1.55
   9  -6  -4   22.82    2.24
   9  -6  -4   17.88    1.94
   9  -6  -4   20.18    2.51
  -9   6   4   19.83    1.98
  -9   6   4   19.16    1.12
  -9   6   4   15.10    1.20
   8  -6  -4    0.52    0.88
   8  -6  -4    1.62    1.09
   8  -6  -4    2.06    0.88
  -8   6   4    0.29    0.75
  -8   6   4    1.91    0.57
  -8   6   4    0.62    0.92
   7  -6  -4   16.79    1.47
   7  -6  -4   14.06    1.63
   7  -6  -4   17.26    1.27
  -7   6   4   14.96    0.98
  -7   6   4   14.90    1.24
  -7   6   4   16.47    1.67
   6  -6  -4    6.15    0.95
   6  -6  -4    6.67    1.19
  -6   6   4    7.95    1.03
  -6   6   4    5.37    0.76
  -6   6   4    5.16    0.63
   5  -6  -4    1.49    0.70
   5  -6  -4    1.08    0.63
   5  -6  -4    0.73    0.38
  -5   6   4    1.30    0.37
  -5   6   4   -0.59    0.75
  -5   6   4    1.73    0.45
   4  -6  -4    4.36    0.80
   4  -6  -4    3.89    0.42
   4  -6  -4    3.84    0.76
  -4   6   4    4.02    0.56
  -4   6   4    4.28    0.41
   3  -6  -4    0.18    0.55
   3  -6  -4    0.17    0.45
  -3   6   4   -0.21    0.40
  -3   6   4   -0.03    0.37
   2  -6  -4   39.08    1.68
  -2   6   4   39.93    1.52
  -2   6   4   39.26    1.60
   1  -6  -4    2.94    0.64
   1  -6  -4    2.27    0.60
  -1   6   4    2.55    0.56
  -1   6   4    2.93    0.17
  -1   6   4    3.04    0.62
   0  -6  -4   26.74    1.44
   0  -6  -4   27.30    1.43
   0   6   4   24.28    1.38
   0   6   4   25.17    0.82
   0   6   4   25.06    1.30
  -1  -6  -4    0.26    0.54
  -1  -6  -4   -0.63    0.55
   1   6   4    0.18    0.54
   1   6   4   -0.54    0.45
  -2  -6  -4    6.78    1.02
  -2  -6  -4    6.60    0.99
  -2  -6  -4    6.56    0.56
   2   6   4    7.10    0.99
  -3  -6  -4    1.13    0.71
  -3  -6  -4   -0.32    0.69
  -3  -6  -4    0.47    0.42
   3   6   4    0.72    0.62
  -4  -6  -4    1.80    0.86
  -4  -6  -4    0.70    0.54
  -4  -6  -4    1.94    0.85
   4   6   4    2.24    0.90
   4   6   4    2.84    0.90
  -5  -6  -4    3.01    0.82
  -5  -6  -4    0.47    1.00
  -5  -6  -4    2.63    0.99
   5   6   4    1.00    0.94
   5   6   4    1.93    0.90
  -6  -6  -4    3.15    1.22
  -6  -6  -4    4.75    1.07
  -6  -6  -4    1.81    1.15
   6   6   4    2.89    1.35
   6   6   4    2.88    1.26
  -7  -6  -4   22.34    2.41
  -7  -6  -4   25.24    2.46
  -7  -6  -4   24.35    2.02
   7   6   4   22.13    2.25
   7   6   4   17.58    2.21
  -8  -6  -4    5.54    2.22
  -8  -6  -4    6.99    2.10
  -8  -6  -4    4.97    1.77
   8   6   4    3.06    1.68
   8   6   4    7.98    2.17
  10  -7  -4    1.29    1.78
  10  -7  -4    0.68    1.97
  10  -7  -4   -0.29    1.42
 -10   7   4    0.68    1.63
   9  -7  -4    1.66    1.66
   9  -7  -4    1.59    1.25
   9  -7  -4    1.89    1.40
  -9   7   4    0.71    1.24
   8  -7  -4   13.60    1.43
   8  -7  -4   17.24    1.99
   8  -7  -4   15.85    1.78
  -8   7   4   13.67    1.56
  -8   7   4   12.73    0.72
   7  -7  -4    1.08    0.60
   7  -7  -4    0.14    1.04
   7  -7  -4    0.68    0.84
  -7   7   4    0.60    0.66
  -7   7   4    1.35    0.54
  -7   7   4    0.96    0.44
   6  -7  -4   48.88    2.20
   6  -7  -4   46.77    2.34
   6  -7  -4   51.07    1.59
  -6   7   4   49.56    1.58
  -6   7   4   49.57    1.71
  -6   7   4   44.91    1.69
   5  -7  -4    9.94    1.17
   5  -7  -4    8.83    0.53
  -5   7   4    9.86    0.82
  -5   7   4    7.81    0.94
  -5   7   4    8.67    0.63
   4  -7  -4   56.24    2.36
   4  -7  -4   56.57    2.28
  -4   7   4   57.01    1.85
   3  -7  -4   14.21    1.24
   3  -7  -4   13.03    1.34
  -3   7   4   14.78    1.11
  -3   7   4   14.75    0.99
   2  -7  -4   32.61    1.73
   2  -7  -4   33.03    1.71
  -2   7   4   34.24    1.59
  -2   7   4   31.84    1.44
   1  -7  -4   34.87    1.75
   1  -7  -4   34.96    1.79
  -1   7   4   31.13    1.55
  -1   7   4   34.29    1.49
   0  -7  -4    0.54    0.71
   0  -7  -4    1.33    0.68
   0   7   4    1.00    0.20
   0   7   4    0.28    0.55
   0   7   4    1.54    0.66
   0   7   4    1.23    0.28
  -1  -7  -4   40.78    2.05
  -1  -7  -4   44.93    2.16
   1   7   4   46.09    2.10
   1   7   4   46.83    2.04
  -2  -7  -4    0.79    0.74
  -2  -7  -4    0.17    0.73
  -2  -7  -4    0.98    0.29
   2   7   4    1.12    0.72
  -3  -7  -4   62.87    1.92
  -3  -7  -4   57.69    2.66
  -3  -7  -4   56.84    2.60
   3   7   4   59.60    2.65
   3   7   4   57.67    2.55
  -4  -7  -4    5.38    1.23
  -4  -7  -4    4.99    0.79
  -4  -7  -4    5.80    1.32
   4   7   4    5.08    1.16
   4   7   4    7.80    1.22
  -5  -7  -4   11.07    1.37
  -5  -7  -4   11.51    1.73
  -5  -7  -4   12.56    1.64
   5   7   4   12.77    1.81
   5   7   4   12.93    1.62
  -6  -7  -4    0.73    1.43
  -6  -7  -4    3.20    1.37
  -6  -7  -4    3.01    1.49
   6   7   4    3.70    1.57
   6   7   4    2.85    1.35
   6   7   4    3.48    1.33
  -7  -7  -4    7.22    1.68
  -7  -7  -4    4.22    2.04
   7   7   4    5.26    3.21
   7   7   4    4.32    1.90
   7   7   4    7.50    1.81
   9  -8  -4    7.24    2.12
   9  -8  -4    8.60    1.80
   9  -8  -4   12.25    1.60
  -9   8   4   11.16    1.54
   8  -8  -4   -1.17    0.70
   8  -8  -4   -1.07    1.53
   8  -8  -4    2.46    1.30
  -8   8   4    0.92    0.99
   7  -8  -4    5.35    1.46
   7  -8  -4    5.17    0.63
   7  -8  -4    6.76    1.28
  -7   8   4    5.19    0.77
   6  -8  -4    2.36    0.95
   6  -8  -4    1.73    1.16
  -6   8   4    0.75    0.45
  -6   8   4    1.28    0.42
   5  -8  -4    0.21    0.89
  -5   8   4   -0.04    0.55
  -5   8   4   -0.93    0.44
   4  -8  -4   11.58    1.43
   4  -8  -4   13.23    1.62
  -4   8   4   13.37    0.95
   3  -8  -4    3.87    1.00
   3  -8  -4    2.34    0.87
  -3   8   4    3.14    0.79
  -3   8   4    3.66    0.68
   2  -8  -4   23.57    1.61
   2  -8  -4   23.91    1.68
  -2   8   4   23.10    1.47
  -2   8   4   20.52    1.27
   1  -8  -4   17.39    1.72
   1  -8  -4   16.28    1.49
  -1   8   4   15.95    1.22
  -1   8   4   16.98    1.42
   0  -8  -4   25.97    1.82
   0  -8  -4   23.79    1.74
   0   8   4   24.68    1.58
   0   8   4   24.86    1.64
  -1  -8  -4    2.72    1.03
  -1  -8  -4    2.10    0.93
   1   8   4    2.84    0.88
   1   8   4    2.29    0.41
   1   8   4    3.00    0.50
  -2  -8  -4    2.86    1.08
  -2  -8  -4    1.78    1.09
   2   8   4   -0.76    0.98
   2   8   4    0.65    0.85
   2   8   4    1.23    0.64
  -3  -8  -4    0.21    0.47
  -3  -8  -4    0.49    1.16
  -3  -8  -4    0.08    0.99
   3   8   4   -0.35    1.03
   3   8   4    0.29    0.80
   3   8   4    1.75    1.00
  -4  -8  -4   -0.42    1.22
  -4  -8  -4    0.91    0.69
  -4  -8  -4   -0.07    1.02
   4   8   4    1.51    1.03
   4   8   4   -1.93    1.23
  -5  -8  -4    5.08    1.61
  -5  -8  -4    5.46    1.04
  -5  -8  -4    4.79    1.64
   5   8   4    6.25    1.72
   5   8   4    8.90    1.71
   5   8   4    4.00    1.51
  -6  -8  -4    2.88    1.46
  -6  -8  -4    0.06    1.96
   6   8   4    0.49    1.67
   6   8   4    3.23    1.90
   6   8   4   -1.47    1.77
   8  -9  -4   18.42    2.40
   8  -9  -4   20.87    2.28
   7  -9  -4    0.84    1.62
   7  -9  -4   -2.22    1.23
   6  -9  -4   26.25    2.19
   6  -9  -4   31.21    2.40
   5  -9  -4   -1.24    1.08
   5  -9  -4    1.02    1.05
  -5   9   4    0.05    0.44
  -5   9   4   -0.63    0.43
   4  -9  -4   24.94    1.82
  -4   9   4   24.84    1.24
  -4   9   4   21.13    1.55
   3  -9  -4   -1.01    1.02
   3  -9  -4   -1.83    0.87
  -3   9   4   -0.48    0.60
  -3   9   4    1.92    0.78
   2  -9  -4    8.63    1.34
   2  -9  -4    7.42    1.31
  -2   9   4    8.26    0.97
  -2   9   4    8.07    1.11
   1  -9  -4   12.17    1.58
   1  -9  -4   13.04    1.59
  -1   9   4   10.73    1.36
  -1   9   4   10.94    1.20
   0  -9  -4    0.26    0.99
   0  -9  -4    0.30    1.06
   0   9   4    0.10    1.02
   0   9   4    1.09    0.88
  -1  -9  -4   19.96    2.06
  -1  -9  -4   16.30    1.82
   1   9   4   15.30    1.67
   1   9   4   15.53    0.68
   1   9   4   15.47    0.79
   1   9   4   17.65    1.99
  -2  -9  -4    1.61    1.22
  -2  -9  -4    0.06    1.15
   2   9   4   -0.45    1.25
   2   9   4   -0.67    1.12
  -3  -9  -4   33.31    1.20
  -3  -9  -4   33.17    2.69
  -3  -9  -4   32.64    2.58
   3   9   4   30.48    2.51
   3   9   4   28.56    1.90
   3   9   4   37.28    2.83
  -4  -9  -4    2.72    1.71
  -4  -9  -4    0.03    1.56
  -4  -9  -4   -0.94    0.71
   4   9   4    0.93    1.68
   4   9   4   -0.17    1.51
  -5  -9  -4    1.60    2.31
  -5  -9  -4    2.46    1.09
   5   9   4    2.65    1.88
   5   9   4    0.00    1.49
   7 -10  -4    1.62    1.74
   7 -10  -4    3.42    2.00
   6 -10  -4    1.44    1.53
   6 -10  -4   -0.37    1.54
   5 -10  -4    0.94    1.31
   4 -10  -4    7.64    1.69
   4 -10  -4    7.27    1.45
  -4  10   4    8.35    0.88
  -4  10   4    7.34    0.80
   3 -10  -4    6.19    1.49
   3 -10  -4    6.40    1.61
  -3  10   4    7.23    1.31
  -3  10   4    7.27    0.91
   2 -10  -4    0.66    1.24
   2 -10  -4    2.30    1.25
  -2  10   4    1.93    0.84
  -2  10   4    1.03    1.03
   1 -10  -4    3.84    1.32
   1 -10  -4    2.64    1.36
  -1  10   4    4.19    1.02
  -1  10   4    0.67    1.16
   0 -10  -4    8.79    1.62
   0 -10  -4    9.92    1.81
   0  10   4    8.43    1.52
   0  10   4    7.19    1.51
  -1 -10  -4    1.54    1.48
  -1 -10  -4    3.12    1.50
   1  10   4    3.55    1.62
   1  10   4    4.14    1.28
  -2 -10  -4    4.62    1.67
  -2 -10  -4   -0.13    1.59
   2  10   4    0.66    0.60
   2  10   4   -3.33    1.43
   2  10   4    0.68    0.48
   2  10   4    3.64    1.48
  -3 -10  -4    0.39    2.03
   3  10   4    3.69    1.64
   3  10   4   -1.64    0.96
   3  10   4    0.09    1.89
   4  10   4    4.28    1.93
   4  10   4    3.25    2.14
   5 -11  -4   -1.78    1.87
   4 -11  -4   33.61    3.12
   4 -11  -4   26.67    3.08
   3 -11  -4   12.42    1.98
   3 -11  -4    9.70    1.96
   2 -11  -4    9.01    1.84
   2 -11  -4    7.10    1.86
  -2  11   4    5.30    0.99
  -2  11   4    3.41    1.18
   1 -11  -4   11.97    2.03
   1 -11  -4   12.79    2.11
  -1  11   4   12.87    1.44
  -1  11   4   10.96    1.54
   0 -11  -4    0.90    1.73
   0  11   4    1.26    1.37
   0  11   4   -0.31    1.42
  -1 -11  -4   20.73    2.75
   1  11   4   21.03    2.63
   1  11   4   19.48    2.21
   0 -12   5   -0.73    1.64
   0 -12   5    1.36    1.70
   1 -12   5    8.28    1.77
   1 -12   5    4.18    1.69
   2 -12   5   -1.55    1.44
   2 -12   5    1.55    1.49
   3 -12   5    2.08    1.42
   3 -12   5    2.79    1.44
   4 -12   5   17.76    2.10
   3  11  -5   -0.39    1.18
  -3 -11   5    4.92    2.03
  -2 -11   5   13.50    2.02
  -2 -11   5   18.92    2.28
  -1 -11   5    2.51    1.41
  -1 -11   5   -1.42    1.41
   0 -11   5    7.58    1.47
   0 -11   5    8.02    1.46
   1 -11   5    0.25    1.17
   1 -11   5    1.12    0.64
   1 -11   5   -0.14    1.17
   2 -11   5   12.64    1.55
   2 -11   5   10.49    1.69
   2 -11   5   12.23    1.04
   3 -11   5    0.82    1.01
   3 -11   5   -1.00    0.96
   4 -11   5   11.43    1.37
   4 -11   5   15.59    1.60
   5 -11   5    1.75    1.07
   5 -11   5    4.91    1.09
   6 -11   5    0.84    1.10
   6 -11   5    1.08    1.11
   5  10  -5   10.52    1.89
   5  10  -5    8.27    2.14
   5  10  -5   12.76    1.87
  -5 -10   5    9.28    2.53
   4  10  -5    7.34    1.56
   4  10  -5    3.21    1.51
  -4 -10   5    4.15    1.79
  -4 -10   5    5.24    1.80
   3  10  -5   10.52    1.53
   3  10  -5   13.80    1.75
   3  10  -5   15.32    1.61
  -3 -10   5   11.84    1.94
  -3 -10   5   14.14    2.04
   2  10  -5    0.60    0.89
   2  10  -5    1.63    0.78
   2  10  -5    3.33    0.83
  -2 -10   5    2.69    1.30
  -2 -10   5    4.07    1.29
   1  10  -5    9.32    0.76
   1  10  -5    9.59    0.90
   1  10  -5    7.78    0.67
  -1 -10   5   10.29    1.46
  -1 -10   5    8.80    1.51
   0 -10   5   -0.43    0.62
   0 -10   5    0.99    0.96
   1 -10   5    1.72    0.83
   1 -10   5    1.96    0.94
   2 -10   5    2.18    0.84
   2 -10   5   -0.17    0.75
   3 -10   5    2.50    0.69
   3 -10   5    2.50    0.79
   3 -10   5    3.66    0.89
   4 -10   5   11.96    1.28
   4 -10   5   12.18    1.27
   4 -10   5   13.07    1.33
   5 -10   5   -0.49    0.72
   6 -10   5   11.67    1.19
   6 -10   5   11.86    1.49
   7 -10   5    4.23    0.95
   8 -10   5    6.31    1.23
   8 -10   5    9.27    1.36
   6   9  -5    0.46    1.73
   6   9  -5   -0.16    1.62
   6   9  -5    0.35    1.81
  -6  -9   5   -1.11    2.13
   5   9  -5   10.57    1.72
   5   9  -5   10.68    1.53
   5   9  -5   10.06    1.87
  -5  -9   5    8.08    1.80
  -5  -9   5    5.07    1.79
   4   9  -5    1.34    1.07
   4   9  -5    2.20    2.32
   4   9  -5    0.62    1.31
  -4  -9   5    1.79    1.39
  -4  -9   5    1.53    1.46
   3   9  -5   11.15    1.39
   3   9  -5   15.83    1.54
  -3  -9   5   11.00    1.56
  -3  -9   5   11.73    1.61
   2   9  -5    3.12    0.75
   2   9  -5    2.61    0.82
   2   9  -5    4.21    0.93
  -2  -9   5    2.86    1.02
  -2  -9   5    3.56    1.10
   1   9  -5    2.06    0.56
   1   9  -5    2.12    0.58
   1   9  -5    2.38    0.46
  -1  -9   5    2.15    0.89
  -1  -9   5    2.41    0.93
   0  -9   5   59.10    2.40
   0  -9   5   56.88    2.33
   1  -9   5    3.11    0.68
   1  -9   5    3.84    0.88
   1  -9   5    4.25    0.96
   2  -9   5   23.45    1.39
   2  -9   5   23.74    1.44
   2  -9   5   23.44    1.39
   3  -9   5    2.96    0.68
   3  -9   5    2.41    0.63
   3  -9   5    2.83    0.69
   4  -9   5    8.29    0.89
   4  -9   5    6.27    0.92
   5  -9   5   10.50    1.08
   5  -9   5    7.71    0.95
   6  -9   5    1.29    0.35
   6  -9   5    0.12    0.67
   6  -9   5    1.18    0.65
   6  -9   5    1.33    0.44
   7  -9   5   25.97    1.20
   7  -9   5   26.29    1.68
   7  -9   5   22.29    1.46
   8  -9   5   -0.19    0.73
   8  -9   5   -1.13    0.79
   8  -9   5    1.23    0.90
   9  -9   5   21.50    2.60
   9  -9   5   15.38    1.94
   9  -9   5   24.31    2.62
   7   8  -5   -0.81    1.58
   7   8  -5    5.12    1.80
   7   8  -5    3.41    1.90
  -7  -8   5   -0.61    2.08
   6   8  -5   -0.23    1.32
   6   8  -5    1.01    1.62
   6   8  -5    0.10    1.34
  -6  -8   5    1.54    1.59
  -6  -8   5   -1.60    1.43
   5   8  -5   14.81    1.75
   5   8  -5   11.57    1.53
   5   8  -5   11.80    1.62
  -5  -8   5   10.45    1.61
  -5  -8   5   14.43    1.86
   4   8  -5    2.11    0.87
   4   8  -5    1.09    1.01
  -4  -8   5    2.05    1.13
  -4  -8   5    2.02    1.05
   3   8  -5    8.10    1.09
   3   8  -5    7.57    0.99
   3   8  -5    9.85    1.20
  -3  -8   5    7.19    1.25
  -3  -8   5    8.17    1.29
   2   8  -5    6.91    0.86
   2   8  -5    6.26    0.89
  -2  -8   5    5.55    1.06
  -2  -8   5    5.62    1.04
   1   8  -5   17.19    1.00
   1   8  -5   17.26    0.99
   1   8  -5   17.98    0.92
  -1  -8   5   16.59    1.36
  -1  -8   5   17.93    1.43
   0   8  -5    2.88    0.45
   0  -8   5    2.60    0.63
   0  -8   5    3.66    0.77
   1  -8   5   -0.29    0.48
   1  -8   5    0.23    0.46
   2  -8   5    4.06    0.82
   2  -8   5    3.41    0.61
   2  -8   5    3.94    0.59
   3  -8   5    3.15    0.63
   3  -8   5    2.88    0.49
   3  -8   5    1.89    0.48
   3  -8   5    1.94    0.22
   4  -8   5   38.55    1.43
   4  -8   5   41.87    1.09
   4  -8   5   41.78    1.77
   5  -8   5    4.72    0.52
   5  -8   5    3.81    0.66
   5  -8   5    4.48    0.57
   5  -8   5    3.72    0.91
   6  -8   5   29.57    1.39
   6  -8   5   28.29    1.21
   6  -8   5   28.32    1.31
   7  -8   5    3.14    0.65
   7  -8   5    3.73    0.68
   7  -8   5    4.30    0.83
   8  -8   5    1.57    0.78
   8  -8   5    0.97    0.87
   8  -8   5    2.40    0.87
   9  -8   5    3.10    1.05
   9  -8   5    1.05    1.13
   9  -8   5    3.36    1.22
   8   7  -5    2.58    1.84
   8   7  -5   -1.85    1.70
   8   7  -5    0.99    1.78
  -8  -7   5   -1.91    2.16
   7   7  -5   20.64    2.43
   7   7  -5   13.92    1.97
   7   7  -5   16.51    2.10
  -7  -7   5   21.36    2.38
  -7  -7   5   14.83    2.04
   6   7  -5   -0.62    1.11
   6   7  -5   -0.34    1.15
   6   7  -5    1.00    1.17
  -6  -7   5    1.08    1.22
  -6  -7   5    2.72    1.26
   5   7  -5   14.84    1.62
   5   7  -5   13.43    1.73
   5   7  -5   16.53    1.72
  -5  -7   5   15.09    1.73
  -5  -7   5   15.01    1.76
   4   7  -5    3.40    0.95
   4   7  -5    4.76    1.04
   4   7  -5    3.11    0.79
  -4  -7   5    2.62    0.93
  -4  -7   5    2.46    0.90
   3   7  -5   14.85    1.27
   3   7  -5   13.40    1.30
   3   7  -5   17.84    1.21
  -3  -7   5   13.08    1.68
  -3  -7   5   16.86    1.48
   2   7  -5   23.86    1.27
   2   7  -5   25.44    1.34
   2   7  -5   26.04    1.21
  -2  -7   5   24.93    1.45
  -2  -7   5   24.46    1.49
   1   7  -5    1.14    0.46
   1   7  -5   -0.44    0.37
   1   7  -5    0.09    0.29
  -1  -7   5   -0.41    0.48
  -1  -7   5    0.20    0.47
   0   7  -5   62.09    1.32
   0   7  -5   62.21    1.71
   0  -7   5   63.91    2.09
   0  -7   5   61.06    2.02
   1  -7   5   -0.37    0.34
   1  -7   5    0.21    0.21
   1  -7   5    0.31    0.43
   2  -7   5   32.87    1.50
   2  -7   5   34.22    1.23
   2  -7   5   31.18    0.94
   2  -7   5   30.32    1.18
   3  -7   5    0.79    0.48
   3  -7   5    0.49    0.22
   3  -7   5    1.00    0.29
   3  -7   5    0.68    0.34
   4  -7   5   13.29    0.80
   4  -7   5   14.77    1.14
   4  -7   5   14.79    0.77
   4  -7   5   16.42    0.74
   5  -7   5   17.55    0.93
   5  -7   5   16.24    1.34
   5  -7   5   17.25    0.90
   5  -7   5   18.47    0.88
   6  -7   5    8.17    0.69
   6  -7   5    7.31    0.91
   7  -7   5   27.28    1.45
   7  -7   5   30.32    1.37
  -8   7  -5   -0.36    0.96
   8  -7   5   -0.20    0.78
   8  -7   5    0.05    0.62
  -9   7  -5   12.49    1.96
   9  -7   5   11.80    1.40
   9  -7   5   13.70    1.69
 -10   7  -5    1.21    1.86
  10  -7   5   -3.30    1.27
  10  -7   5   -0.06    1.15
  10  -7   5    2.04    1.59
   9   6  -5    4.51    2.24
  -9  -6   5    0.68    2.69
   8   6  -5    2.10    1.61
   8   6  -5    1.23    1.40
   8   6  -5   -1.89    1.54
  -8  -6   5    1.44    1.43
  -8  -6   5    1.54    1.66
   7   6  -5    0.09    1.22
   7   6  -5    1.58    1.32
   7   6  -5    2.10    1.21
  -7  -6   5   -0.46    1.07
  -7  -6   5    0.45    1.29
   6   6  -5    5.53    1.28
   6   6  -5    4.24    1.17
   6   6  -5    8.70    1.26
  -6  -6   5    8.18    1.44
  -6  -6   5    7.28    1.36
   5   6  -5   11.04    1.27
   5   6  -5   13.26    1.55
  -5  -6   5   12.30    1.50
  -5  -6   5   13.36    1.52
   4   6  -5   15.52    1.38
   4   6  -5   15.03    1.20
   4   6  -5   14.61    1.27
  -4  -6   5   16.73    1.40
  -4  -6   5   14.92    1.42
   3   6  -5   12.52    1.07
   3   6  -5   13.89    1.08
   3   6  -5   13.62    0.97
  -3  -6   5   12.80    1.19
  -3  -6   5   13.17    1.19
   2   6  -5    4.95    0.67
   2   6  -5    4.88    0.61
  -2  -6   5    5.08    0.75
  -2  -6   5    6.68    0.83
   1   6  -5   18.36    0.95
   1   6  -5   17.76    0.90
  -1  -6   5   19.65    1.06
  -1  -6   5   19.39    1.05
   0   6  -5    1.83    0.19
   0   6  -5    2.09    0.25
   0   6  -5    1.72    0.37
   0  -6   5    1.92    0.36
   0  -6   5    2.74    0.43
   0  -6   5    2.15    0.45
   1  -6   5    0.98    0.29
   1  -6   5    0.93    0.32
   1  -6   5    1.24    0.24
   2  -6   5   -0.09    0.20
   2  -6   5    0.82    0.39
   2  -6   5   -0.10    0.21
   3  -6   5    4.25    0.66
   3  -6   5    4.86    0.44
   3  -6   5    3.71    0.40
   3  -6   5    4.14    0.38
   4  -6   5   15.50    0.69
   4  -6   5   16.29    0.66
   4  -6   5   15.56    0.80
   4  -6   5   15.23    1.06
   5  -6   5   11.57    1.08
   5  -6   5    9.59    0.69
   5  -6   5   10.92    0.60
  -6   6  -5    1.92    0.72
   6  -6   5    1.71    0.50
   6  -6   5    2.10    0.40
  -7   6  -5    3.57    0.97
   7  -6   5    4.48    0.62
   7  -6   5    4.15    0.75
  -8   6  -5   -1.49    0.94
   8  -6   5   -0.57    0.69
   8  -6   5   -1.34    0.52
  -9   6  -5    3.07    1.38
   9  -6   5   -0.26    0.76
 -10   6  -5    4.53    1.81
  10  -6   5    4.73    1.40
  10  -6   5    2.01    1.17
   9   5  -5   34.79    2.89
   9   5  -5   22.26    2.86
   9   5  -5   25.02    3.10
  -9  -5   5   22.60    2.60
  -9  -5   5   24.25    2.82
   8   5  -5    3.43    1.52
   8   5  -5    4.73    1.31
   8   5  -5    0.33    1.31
  -8  -5   5    4.23    1.48
  -8  -5   5    5.38    1.60
   7   5  -5   20.04    1.88
   7   5  -5   18.46    1.87
   7   5  -5   18.40    1.99
  -7  -5   5   15.12    1.87
  -7  -5   5   20.16    1.92
   6   5  -5   -0.37    0.74
   6   5  -5   -1.05    0.73
   6   5  -5   -1.39    0.84
  -6  -5   5   -0.46    0.85
  -6  -5   5   -0.04    0.89
   5   5  -5   22.77    1.64
   5   5  -5   23.98    1.47
   5   5  -5   24.83    1.61
  -5  -5   5   26.15    1.71
  -5  -5   5   26.23    1.69
   4   5  -5    2.29    0.65
   4   5  -5    2.90    0.76
   4   5  -5    2.97    0.61
  -4  -5   5    1.93    0.68
  -4  -5   5    1.19    0.63
   3   5  -5   23.16    1.24
   3   5  -5   21.47    1.16
   3   5  -5   20.95    1.19
  -3  -5   5   21.54    1.28
  -3  -5   5   22.28    1.29
   2   5  -5  101.58    2.60
   2   5  -5  100.35    2.64
   2   5  -5   96.67    2.72
  -2  -5   5   99.35    2.80
  -2  -5   5   98.72    2.77
   1   5  -5    1.37    0.36
   1   5  -5    1.13    0.28
   1   5  -5    1.70    0.38
  -1  -5   5    1.48    0.40
  -1  -5   5    1.46    0.32
  -1  -5   5    2.15    0.42
   0   5  -5   93.78    1.86
   0   5  -5   91.72    1.85
   0   5  -5   92.38    2.25
   0  -5   5   91.91    2.31
   0  -5   5   92.53    2.29
   0  -5   5   89.85    2.24
   1  -5   5   13.63    0.63
   1  -5   5   12.81    0.60
   1  -5   5   14.07    0.61
   2  -5   5   64.68    1.93
   2  -5   5   61.35    1.43
   2  -5   5   63.96    1.44
   2  -5   5   61.92    1.63
   3  -5   5    8.94    1.30
   3  -5   5    9.34    0.59
   3  -5   5    8.98    0.37
   3  -5   5    9.36    0.35
   4  -5   5   46.26    1.21
   4  -5   5   48.72    1.84
   4  -5   5   48.63    1.20
  -5   5  -5   31.82    1.52
   5  -5   5   31.12    1.07
   5  -5   5   30.01    1.00
   5  -5   5   29.67    1.52
  -6   5  -5    7.13    1.04
   6  -5   5    6.93    0.72
   6  -5   5    6.07    0.58
  -7   5  -5   49.01    2.24
   7  -5   5   49.05    1.70
   7  -5   5   48.24    1.84
  -8   5  -5    2.17    0.95
   8  -5   5    1.70    0.56
   8  -5   5    1.82    0.77
  -9   5  -5   32.45    2.46
   9  -5   5   34.86    2.37
   9  -5   5   33.12    1.81
 -10   5  -5    2.13    1.60
  10  -5   5    0.93    1.07
  10  -5   5    2.20    1.28
 -11   5  -5    6.56    2.58
  11  -5   5    6.69    2.07
  11  -5   5   12.11    1.75
  11  -5   5   10.69    1.94
  10   4  -5    2.06    2.11
 -10  -4   5    4.75    2.29
   9   4  -5    2.61    1.55
   9   4  -5    3.95    1.56
   9   4  -5    3.11    1.34
  -9  -4   5    3.71    1.58
  -9  -4   5    2.06    1.40
   8   4  -5   -0.64    1.12
   8   4  -5   -1.87    1.00
   8   4  -5    0.36    1.13
  -8  -4   5   -0.82    1.18
  -8  -4   5   -1.53    1.11
   7   4  -5    3.79    1.15
   7   4  -5    5.79    1.10
   7   4  -5    3.83    1.14
  -7  -4   5    4.03    1.10
  -7  -4   5    5.31    1.14
   6   4  -5    6.43    1.09
   6   4  -5    4.56    1.02
   6   4  -5    5.02    0.88
  -6  -4   5    6.67    1.40
  -6  -4   5    5.84    1.05
   5   4  -5    8.98    1.10
   5   4  -5    9.42    1.11
   5   4  -5    8.38    0.94
  -5  -4   5    9.34    1.10
  -5  -4   5    8.28    1.13
   4   4  -5   20.30    1.28
   4   4  -5   20.06    1.26
   4   4  -5   23.39    1.22
  -4  -4   5   22.81    1.33
  -4  -4   5   23.50    1.35
   3   4  -5    3.44    0.58
   3   4  -5    2.71    0.54
   3   4  -5    2.87    0.52
  -3  -4   5    2.39    0.55
  -3  -4   5    2.34    0.55
   2   4  -5    8.86    0.63
   2   4  -5    6.96    0.67
   2   4  -5    7.24    0.70
  -2  -4   5    7.18    0.61
  -2  -4   5    8.46    0.87
  -2  -4   5    7.90    0.71
   1   4  -5    5.63    0.48
   1   4  -5    4.27    0.36
   1   4  -5    4.13    0.49
  -1  -4   5    5.07    0.53
  -1  -4   5    5.19    0.46
  -1  -4   5    5.53    0.52
   0   4  -5    4.32    0.45
   0   4  -5    4.03    0.16
   0  -4   5    4.77    0.42
   0  -4   5    4.44    0.40
   0  -4   5    4.26    0.39
  -1   4  -5   30.62    1.00
   1  -4   5   29.08    0.97
   1  -4   5   31.20    0.81
   1  -4   5   30.88    0.80
   2  -4   5    0.22    0.30
   2  -4   5    0.22    0.19
   3  -4   5   21.99    1.09
  -4   4  -5   23.48    1.18
   4  -4   5   20.89    1.16
   4  -4   5   21.90    0.66
   4  -4   5   22.21    0.70
  -5   4  -5   24.98    1.34
   5  -4   5   23.83    1.38
   5  -4   5   25.59    0.90
   5  -4   5   25.82    0.96
  -6   4  -5    0.23    0.50
   6  -4   5    0.27    0.29
   6  -4   5   -0.26    0.35
  -7   4  -5   15.19    1.40
   7  -4   5   14.12    0.99
   7  -4   5   15.77    1.15
  -8   4  -5    2.02    0.89
   8  -4   5    1.01    0.75
   8  -4   5    0.75    0.57
  -9   4  -5   -0.52    1.18
   9  -4   5   -0.01    0.83
   9  -4   5    2.43    0.98
 -10   4  -5    4.79    1.66
  10  -4   5    1.58    1.33
  10  -4   5    1.61    1.04
 -11   4  -5    2.12    2.27
  11  -4   5    5.62    1.81
  11  -4   5    1.79    1.47
  10   3  -5    3.67    1.66
 -10  -3   5    6.48    1.90
 -10  -3   5    5.14    1.76
   9   3  -5   12.44    1.89
   9   3  -5   15.72    1.91
   9   3  -5   13.70    1.95
  -9  -3   5   13.55    1.81
  -9  -3   5   11.85    1.79
   8   3  -5    4.53    1.32
   8   3  -5    3.57    1.11
   8   3  -5    1.45    1.22
  -8  -3   5    5.78    1.29
  -8  -3   5    4.20    1.19
   7   3  -5   42.59    2.29
   7   3  -5   43.71    2.31
   7   3  -5   43.00    2.12
  -7  -3   5   44.37    2.27
  -7  -3   5   44.89    2.21
   6   3  -5    3.31    0.86
   6   3  -5    4.22    0.86
   6   3  -5    2.95    0.77
  -6  -3   5    2.85    1.28
  -6  -3   5    2.19    0.76
   5   3  -5   43.11    1.91
   5   3  -5   42.97    1.88
   5   3  -5   42.16    1.79
  -5  -3   5   44.46    1.89
  -5  -3   5   44.14    1.89
   4   3  -5    3.44    0.64
   4   3  -5    3.27    0.54
   4   3  -5    1.94    0.52
  -4  -3   5    2.83    0.63
  -4  -3   5    3.16    0.60
   3   3  -5   88.57    3.38
   3   3  -5   87.53    2.40
   3   3  -5   86.60    2.46
  -3  -3   5   85.15    2.45
  -3  -3   5   86.96    2.48
  -3  -3   5   89.37    2.52
   2   3  -5   45.10    1.47
   2   3  -5   46.25    1.42
   2   3  -5   43.43    1.49
  -2  -3   5   47.49    1.53
  -2  -3   5   45.89    1.50
  -2  -3   5   45.37    1.50
   1   3  -5   12.46    0.60
   1   3  -5   12.61    0.55
   1   3  -5   11.64    0.67
  -1  -3   5   11.20    0.62
  -1  -3   5   12.40    0.66
  -1  -3   5   12.80    0.66
   0   3  -5   49.39    1.40
   0  -3   5   51.55    1.27
   0  -3   5   48.40    1.24
   0  -3   5   52.54    1.42
   1  -3   5    4.18    0.36
   2  -3   5   59.31    1.61
   2  -3   5   61.10    1.79
  -3   3  -5    1.37    0.36
   3  -3   5    2.83    0.52
  -4   3  -5   21.98    1.14
   4  -3   5   21.83    0.74
   4  -3   5   21.94    1.18
   4  -3   5   20.72    0.70
  -5   3  -5   24.77    1.33
   5  -3   5   24.66    0.94
   5  -3   5   25.05    1.00
   5  -3   5   24.95    1.41
  -6   3  -5    1.78    0.63
   6  -3   5    1.71    0.40
  -7   3  -5   30.56    1.81
   7  -3   5   27.82    1.44
   7  -3   5   28.28    1.35
  -8   3  -5    5.25    1.13
   8  -3   5    5.43    0.96
   8  -3   5    4.86    0.85
  -9   3  -5   26.49    2.16
   9  -3   5   21.72    1.80
   9  -3   5   27.72    1.75
 -10   3  -5    1.71    1.39
  10  -3   5    3.42    1.07
  10  -3   5    1.39    1.29
 -11   3  -5   12.27    2.59
  11  -3   5    8.47    1.71
  11  -3   5   10.96    2.02
 -11  -2   5   11.34    2.47
 -11  -2   5   16.18    2.68
  10   2  -5   -0.47    1.54
  10   2  -5   -1.17    1.55
  10   2  -5    0.25    1.43
 -10  -2   5    1.09    1.58
 -10  -2   5   -1.26    1.51
   9   2  -5    0.25    1.22
   9   2  -5   -0.48    1.23
   9   2  -5    1.24    0.97
  -9  -2   5   -1.24    1.25
  -9  -2   5   -0.91    1.11
   8   2  -5    0.33    1.05
   8   2  -5    0.73    0.82
   8   2  -5   -0.29    0.85
  -8  -2   5    1.09    0.97
  -8  -2   5   -0.11    0.94
   7   2  -5   13.81    1.50
   7   2  -5   12.28    1.25
   7   2  -5   13.59    1.47
  -7  -2   5   14.89    1.44
  -7  -2   5   15.36    1.38
   6   2  -5   13.39    1.27
   6   2  -5   13.89    1.16
   6   2  -5   12.94    1.12
  -6  -2   5   15.02    1.23
  -6  -2   5   13.32    1.22
   5   2  -5    1.46    0.59
   5   2  -5    2.46    0.53
   5   2  -5    0.97    0.58
  -5  -2   5    0.95    0.53
  -5  -2   5    2.07    0.59
   4   2  -5   82.23    2.47
   4   2  -5   80.96    2.40
   4   2  -5   80.81    2.47
  -4  -2   5   84.23    2.50
  -4  -2   5   80.45    2.41
   3   2  -5   43.46    1.59
   3   2  -5   45.63    1.59
   3   2  -5   46.87    1.54
  -3  -2   5   49.26    1.85
  -3  -2   5   48.03    1.62
  -3  -2   5   46.47    1.61
   2   2  -5   43.55    1.45
   2   2  -5   44.88    1.42
   2   2  -5   45.00    1.36
  -2  -2   5   46.96    1.44
  -2  -2   5   44.71    1.41
  -2  -2   5   43.44    1.44
   1   2  -5    7.61    0.44
   1   2  -5    7.55    0.47
   1   2  -5    7.22    0.55
  -1  -2   5    8.38    0.52
  -1  -2   5    7.37    0.49
  -1  -2   5    8.25    0.54
   0   2  -5    2.03    0.14
   0   2  -5    1.98    0.18
   0   2  -5    2.30    0.35
   0  -2   5    2.27    0.25
   0  -2   5    1.82    0.31
   0  -2   5    2.03    0.23
   1  -2   5   46.20    1.31
   2  -2   5   12.23    0.75
  -3   2  -5   87.41    2.36
   3  -2   5   86.84    2.39
   3  -2   5   81.58    1.82
   3  -2   5   83.59    1.85
  -4   2  -5   38.65    1.54
   4  -2   5   40.45    1.60
   4  -2   5   38.62    1.19
   4  -2   5   38.34    1.15
  -5   2  -5   46.58    1.84
   5  -2   5   48.37    1.53
   5  -2   5   42.54    1.85
   5  -2   5   46.96    1.47
  -6   2  -5    0.28    0.18
  -6   2  -5    0.26    0.21
  -6   2  -5    0.17    0.45
   6  -2   5    0.05    0.43
   6  -2   5   -0.04    0.35
  -7   2  -5   11.57    1.32
  -7   2  -5   14.44    0.65
  -7   2  -5   14.11    0.70
   7  -2   5   15.33    1.08
   7  -2   5   15.08    1.21
  -8   2  -5   11.65    0.78
  -8   2  -5   11.87    0.68
  -8   2  -5   13.24    1.53
   8  -2   5   11.47    1.36
   8  -2   5   16.03    1.32
  -9   2  -5    0.48    0.43
  -9   2  -5    0.60    0.49
  -9   2  -5   -0.74    1.06
   9  -2   5    2.94    1.07
 -10   2  -5    4.66    0.68
 -10   2  -5    6.78    0.79
 -10   2  -5    8.19    1.64
  10  -2   5    3.51    1.42
  10  -2   5    4.51    1.27
 -11   2  -5    2.14    2.14
  11  -2   5   -1.46    1.61
  11  -2   5    0.41    1.57
  11   1  -5    6.34    2.23
 -11  -1   5    7.19    2.00
 -11  -1   5    8.96    2.89
 -11  -1   5    9.85    2.14
  10   1  -5    1.42    1.50
  10   1  -5   -0.45    1.49
  10   1  -5   -0.19    1.29
 -10  -1   5   -0.92    1.36
 -10  -1   5   -0.92    1.45
   9   1  -5   27.86    2.10
   9   1  -5   28.04    2.37
   9   1  -5   30.88    2.40
  -9  -1   5   26.67    2.12
  -9  -1   5   26.57    2.10
   8   1  -5    1.80    1.06
   8   1  -5    0.76    0.82
   8   1  -5    0.66    0.91
  -8  -1   5    1.02    0.87
  -8  -1   5    1.21    0.91
   7   1  -5   51.83    2.39
   7   1  -5   53.96    2.24
   7   1  -5   53.00    2.35
  -7  -1   5   52.89    2.25
  -7  -1   5   51.91    2.24
   6   1  -5    1.22    0.57
   6   1  -5    2.08    0.65
   6   1  -5    0.77    0.64
  -6  -1   5    1.37    0.57
  -6  -1   5    0.97    0.60
   5   1  -5   18.95    1.21
   5   1  -5   19.91    1.15
   5   1  -5   18.54    1.21
  -5  -1   5   20.76    1.13
  -5  -1   5   20.28    1.18
   4   1  -5   42.05    1.60
   4   1  -5   39.16    1.55
   4   1  -5   40.67    1.52
  -4  -1   5   40.79    1.56
  -4  -1   5   39.80    1.53
   3   1  -5   45.73    1.56
   3   1  -5   46.96    1.50
   3   1  -5   44.39    1.52
  -3  -1   5   44.47    1.50
  -3  -1   5   41.57    1.48
  -3  -1   5   45.22    1.51
   2   1  -5  324.76    6.77
   2   1  -5  336.49    6.71
   2   1  -5  331.34    6.74
  -2  -1   5  334.75    6.74
  -2  -1   5  335.86    6.77
  -2  -1   5  337.29    6.80
   1   1  -5  132.97    2.98
   1   1  -5  131.33    2.86
   1   1  -5  133.99    2.90
  -1  -1   5  132.49    2.91
  -1  -1   5  133.67    2.90
  -1  -1   5  136.67    3.00
   0   1  -5   78.17    1.70
   0   1  -5   79.00    1.92
   0   1  -5   78.01    1.68
   0  -1   5   78.29    1.91
   0  -1   5   78.60    1.75
   0  -1   5   77.56    1.75
  -1   1  -5    5.04    0.21
  -1   1  -5    5.38    0.20
   1  -1   5    5.36    0.49
   1  -1   5    5.46    0.31
   1  -1   5    5.60    0.29
   1  -1   5    5.33    0.44
  -2   1  -5   95.91    1.90
  -2   1  -5  101.08    2.47
  -2   1  -5   94.47    1.90
   2  -1   5   98.83    2.47
   2  -1   5   96.64    2.11
   2  -1   5   99.05    2.10
  -3   1  -5   22.04    0.64
  -3   1  -5   20.95    0.63
  -3   1  -5   21.49    1.01
   3  -1   5   20.77    0.76
   3  -1   5   21.83    1.06
   3  -1   5   21.11    0.80
  -4   1  -5   25.82    0.85
  -4   1  -5   27.05    1.22
  -4   1  -5   27.84    0.86
   4  -1   5   25.83    1.05
   4  -1   5   26.72    1.02
   4  -1   5   28.89    1.33
  -5   1  -5   75.60    1.94
  -5   1  -5   78.37    2.52
  -5   1  -5   80.19    1.99
   5  -1   5   77.51    2.21
  -6   1  -5    2.37    0.39
  -6   1  -5    2.22    0.44
  -6   1  -5    1.78    0.65
   6  -1   5    2.92    0.60
   6  -1   5    2.97    0.57
  -7   1  -5   35.93    1.99
  -7   1  -5   41.64    1.51
  -7   1  -5   42.63    1.47
   7  -1   5   40.10    1.77
   7  -1   5   41.73    1.86
  -8   1  -5    3.68    0.65
  -8   1  -5    3.67    1.08
  -8   1  -5    5.07    0.80
   8  -1   5    5.12    1.07
   8  -1   5    4.94    0.97
  -9   1  -5   34.28    1.71
  -9   1  -5   33.03    1.56
  -9   1  -5   35.06    2.42
   9  -1   5   33.22    2.00
   9  -1   5   35.46    2.34
 -10   1  -5    0.62    0.78
 -10   1  -5    0.27    1.09
 -10   1  -5   -0.20    0.94
  10  -1   5    1.38    1.34
  10  -1   5    0.00    1.25
 -11   1  -5    8.19    1.12
 -11   1  -5    8.26    2.31
 -11   1  -5   11.49    1.86
  11  -1   5    9.45    1.93
  11  -1   5    7.05    1.89
  11   0  -5   13.60    2.28
 -11   0   5   13.42    2.10
 -11   0   5    8.78    2.63
 -11   0   5   14.12    2.08
  10   0  -5   -1.52    1.51
  10   0  -5    1.17    1.29
  10   0  -5    1.52    1.49
 -10   0   5    2.11    1.55
 -10   0   5    1.52    1.38
 -10   0   5    1.51    1.34
   9   0  -5    1.07    1.20
   9   0  -5    1.66    1.01
   9   0  -5    3.02    1.30
  -9   0   5   -0.30    0.99
  -9   0   5    1.35    1.08
   8   0  -5    0.61    0.83
   8   0  -5    0.83    0.90
   8   0  -5    0.88    0.71
  -8   0   5    0.61    0.79
  -8   0   5    1.10    0.88
   7   0  -5    0.58    0.65
   7   0  -5    0.92    0.60
  -7   0   5   -1.10    0.58
  -7   0   5   -0.69    0.61
   6   0  -5   19.87    1.37
   6   0  -5   23.41    1.33
   6   0  -5   23.74    1.45
  -6   0   5   22.38    1.31
  -6   0   5   22.71    1.34
   5   0  -5    8.31    0.81
   5   0  -5    9.07    0.92
   5   0  -5    9.38    0.91
  -5   0   5   10.23    0.89
  -5   0   5   10.56    0.86
   4   0  -5   79.24    2.36
   4   0  -5   78.62    2.34
   4   0  -5   81.98    2.32
  -4   0   5   81.60    2.34
  -4   0   5   79.27    2.30
  -4   0   5   79.88    2.34
   3   0  -5    0.70    0.35
   3   0  -5    0.51    0.26
   3   0  -5    0.87    0.30
  -3   0   5    0.58    0.27
  -3   0   5    0.49    0.27
  -3   0   5    0.57    0.31
   2   0  -5    8.27    0.60
   2   0  -5    8.19    0.60
   2   0  -5    9.57    0.54
  -2   0   5    7.33    0.55
  -2   0   5    8.50    0.58
  -2   0   5    7.38    0.55
   1   0  -5    2.42    0.36
   1   0  -5    2.80    0.34
   1   0  -5    2.48    0.36
  -1   0   5    3.09    0.38
  -1   0   5    2.62    0.33
  -1   0   5    2.45    0.34
   0   0  -5   12.40    0.53
   0   0  -5   12.25    0.61
   0   0   5   12.47    0.57
   0   0   5   12.00    0.56
   0   0   5   12.35    0.58
  -1   0  -5   28.77    0.88
  -1   0  -5   30.07    0.89
   1   0   5   31.32    0.94
   1   0   5   30.59    0.94
   1   0   5   29.16    1.02
  -2   0  -5    5.79    0.42
  -2   0  -5    5.88    0.39
  -2   0  -5    6.00    0.51
   2   0   5    5.71    0.49
   2   0   5    5.57    0.54
   2   0   5    5.16    0.41
  -3   0  -5   62.80    1.63
  -3   0  -5   61.10    1.85
  -3   0  -5   60.74    1.62
   3   0   5   57.92    1.86
   3   0   5   62.32    1.70
   3   0   5   58.12    1.70
  -4   0  -5    7.12    0.55
  -4   0  -5    6.61    0.57
  -4   0  -5    6.90    0.72
   4   0   5    5.73    0.75
   4   0   5    6.44    0.64
   4   0   5    7.04    0.59
  -5   0  -5   39.47    1.72
  -5   0  -5   43.01    1.44
  -5   0  -5   38.47    1.39
   5   0   5   40.65    1.61
   5   0   5   40.48    1.54
  -6   0  -5    0.98    0.44
  -6   0  -5    0.94    0.59
  -6   0  -5    1.11    0.46
   6   0   5    1.28    0.47
   6   0   5    0.63    0.52
  -7   0  -5   21.36    1.46
  -7   0  -5   24.03    1.31
  -7   0  -5   25.04    1.29
   7   0   5   22.16    1.51
   7   0   5   21.94    1.41
  -8   0  -5    1.13    0.89
  -8   0  -5    1.85    0.67
  -8   0  -5    0.50    0.72
   8   0   5    2.00    0.94
   8   0   5    1.68    0.94
  -9   0  -5    1.28    1.14
  -9   0  -5   -0.66    0.87
  -9   0  -5    0.66    0.80
   9   0   5    0.05    0.93
   9   0   5    0.34    1.09
 -10   0  -5   16.32    2.15
 -10   0  -5   17.48    1.99
 -10   0  -5   13.78    1.73
  10   0   5   11.30    1.87
  10   0   5   13.45    1.78
 -11   0  -5    2.10    1.59
 -11   0  -5    2.42    1.86
 -11   0  -5   -0.04    2.70
  11   0   5   -2.57    1.69
  11  -1  -5   10.04    2.13
 -11   1   5    9.60    1.90
 -11   1   5    9.01    1.81
 -11   1   5    9.12    2.65
  10  -1  -5   10.32    1.57
  10  -1  -5   10.87    1.76
  10  -1  -5    5.61    1.76
 -10   1   5    6.07    1.71
 -10   1   5    6.10    1.53
 -10   1   5    7.97    1.45
   9  -1  -5   37.51    2.28
   9  -1  -5   37.27    2.37
   9  -1  -5   36.53    2.47
  -9   1   5   35.91    2.27
  -9   1   5   39.33    2.17
   8  -1  -5    0.89    0.73
   8  -1  -5    0.64    0.93
   8  -1  -5    2.30    0.96
  -8   1   5    2.08    0.93
  -8   1   5    2.23    0.81
   7  -1  -5   37.33    1.78
   7  -1  -5   30.33    1.85
   7  -1  -5   33.97    1.83
  -7   1   5   30.48    1.71
  -7   1   5   36.11    1.81
   6  -1  -5    0.25    0.48
   6  -1  -5    0.15    0.59
   6  -1  -5    0.74    0.58
  -6   1   5   -0.03    0.44
  -6   1   5    0.10    0.55
   5  -1  -5   17.26    1.03
   5  -1  -5   17.78    1.14
   5  -1  -5   18.07    1.10
  -5   1   5   19.64    1.10
  -5   1   5   17.55    1.06
   4  -1  -5   23.80    1.34
   4  -1  -5   26.36    1.23
   4  -1  -5   25.32    1.15
  -4   1   5   27.51    1.41
  -4   1   5   25.87    1.16
  -4   1   5   25.12    1.15
   3  -1  -5    2.46    0.43
   3  -1  -5    1.63    0.44
   3  -1  -5    2.36    0.39
  -3   1   5    2.14    0.42
  -3   1   5    2.69    0.44
  -3   1   5    2.26    0.36
   2  -1  -5   54.89    1.54
   2  -1  -5   54.62    1.63
   2  -1  -5   55.03    1.59
  -2   1   5   56.29    1.61
  -2   1   5   54.02    1.52
  -2   1   5   55.69    1.61
   1  -1  -5   35.76    1.15
   1  -1  -5   36.71    1.11
   1  -1  -5   34.93    1.18
  -1   1   5   35.86    1.17
  -1   1   5   35.45    1.16
  -1   1   5   36.63    1.09
   0  -1  -5   74.08    1.88
   0  -1  -5   77.13    1.89
   0   1   5   71.32    1.89
   0   1   5   74.78    1.90
   0   1   5   77.00    1.85
  -1  -1  -5   29.62    1.01
  -1  -1  -5   30.52    1.02
   1   1   5   29.42    0.99
   1   1   5   28.39    1.01
   1   1   5   28.78    1.05
  -2  -1  -5   69.53    1.86
  -2  -1  -5   66.15    1.81
  -2  -1  -5   67.75    1.85
   2   1   5   66.79    1.89
   2   1   5   69.65    1.87
   2   1   5   68.02    1.87
  -3  -1  -5   42.15    1.50
  -3  -1  -5   41.93    1.42
  -3  -1  -5   44.26    1.44
   3   1   5   44.89    1.52
   3   1   5   44.33    1.46
   3   1   5   41.56    1.51
  -4  -1  -5    4.06    0.60
  -4  -1  -5    4.04    0.62
  -4  -1  -5    3.63    0.54
   4   1   5    3.29    0.51
   4   1   5    3.79    0.61
  -5  -1  -5   59.89    1.96
  -5  -1  -5   59.03    2.16
  -5  -1  -5   57.13    1.91
   5   1   5   55.69    2.04
   5   1   5   58.12    2.01
  -6  -1  -5    1.93    0.54
  -6  -1  -5    1.77    0.62
  -6  -1  -5    1.68    0.69
   6   1   5    1.39    0.60
   6   1   5    0.98    0.65
  -7  -1  -5   44.68    2.21
  -7  -1  -5   42.03    1.87
  -7  -1  -5   45.63    1.95
   7   1   5   42.91    2.10
   7   1   5   45.54    2.09
  -8  -1  -5   10.09    1.44
  -8  -1  -5   12.25    1.29
  -8  -1  -5   11.64    1.44
   8   1   5   10.30    1.29
   8   1   5   10.24    1.44
  -9  -1  -5   30.88    2.17
  -9  -1  -5   25.86    2.35
   9   1   5   26.91    2.31
   9   1   5   35.48    2.39
 -10  -1  -5    8.08    1.95
 -10  -1  -5    8.39    1.65
 -10  -1  -5    5.83    1.36
  10   1   5    6.55    1.65
  10   1   5    3.36    1.71
 -11  -1  -5    3.03    1.65
 -11  -1  -5    1.69    1.70
  11   1   5    3.60    2.15
  11  -2  -5   13.96    2.20
  11  -2  -5    8.80    2.04
 -11   2   5   13.96    1.92
 -11   2   5   15.91    2.04
 -11   2   5   11.43    2.58
  10  -2  -5    0.04    1.21
  10  -2  -5   -0.30    1.35
  10  -2  -5    0.60    1.27
 -10   2   5    0.58    1.14
 -10   2   5    0.83    1.31
 -10   2   5    0.93    1.61
   9  -2  -5   11.92    1.51
   9  -2  -5    9.53    1.49
   9  -2  -5   11.29    1.64
  -9   2   5    9.98    1.31
  -9   2   5   12.05    1.72
  -9   2   5   10.12    1.37
   8  -2  -5    7.54    1.16
   8  -2  -5    9.41    1.26
   8  -2  -5    5.54    1.16
  -8   2   5    8.12    1.12
  -8   2   5    7.54    1.15
   7  -2  -5    9.08    1.19
   7  -2  -5    9.79    1.14
   7  -2  -5   10.13    1.09
  -7   2   5    9.24    1.10
  -7   2   5    9.15    1.11
   6  -2  -5   44.14    1.90
   6  -2  -5   45.16    1.87
   6  -2  -5   43.26    1.82
  -6   2   5   42.25    1.71
  -6   2   5   42.79    1.75
   5  -2  -5    0.33    0.48
   5  -2  -5   -0.20    0.39
   5  -2  -5   -0.01    0.35
  -5   2   5    0.11    0.40
  -5   2   5    0.77    0.40
   4  -2  -5   79.72    2.38
   4  -2  -5   81.01    2.26
   4  -2  -5   81.62    2.34
  -4   2   5   78.91    2.29
  -4   2   5   78.69    3.11
   3  -2  -5   11.38    0.74
   3  -2  -5    9.91    0.65
   3  -2  -5   10.54    0.78
  -3   2   5   10.81    0.70
  -3   2   5   10.54    0.64
  -3   2   5   10.61    0.75
   2  -2  -5   17.99    0.77
   2  -2  -5   18.30    0.94
   2  -2  -5   19.00    0.89
  -2   2   5   17.91    0.90
  -2   2   5   21.29    0.79
  -2   2   5   17.71    0.86
   1  -2  -5    8.66    0.65
   1  -2  -5    9.09    0.60
   1  -2  -5    9.13    0.53
  -1   2   5    9.88    0.48
  -1   2   5    9.02    0.65
  -1   2   5    9.75    0.62
   0  -2  -5    0.50    0.30
   0  -2  -5    0.53    0.21
   0   2   5    0.73    0.31
   0   2   5    0.59    0.20
   0   2   5    0.48    0.19
   0   2   5    0.81    0.29
  -1  -2  -5   67.41    1.89
  -1  -2  -5   67.44    1.92
  -1  -2  -5   68.85    1.69
   1   2   5   65.72    1.89
   1   2   5   67.17    1.94
   1   2   5   65.83    1.68
  -2  -2  -5    3.69    0.50
  -2  -2  -5    4.24    0.54
  -2  -2  -5    3.71    0.44
   2   2   5    3.87    0.56
   2   2   5    3.81    0.48
   2   2   5    4.09    0.49
  -3  -2  -5   88.73    2.44
  -3  -2  -5   87.56    2.45
  -3  -2  -5   89.29    2.50
   3   2   5   90.66    2.52
   3   2   5   86.50    2.54
  -4  -2  -5    7.28    0.78
  -4  -2  -5    7.89    0.78
  -4  -2  -5    6.19    0.73
   4   2   5    6.61    0.73
   4   2   5    6.96    0.84
  -5  -2  -5   63.35    2.28
  -5  -2  -5   63.69    2.21
  -5  -2  -5   64.70    2.21
   5   2   5   64.38    2.27
   5   2   5   59.87    2.27
  -6  -2  -5    0.84    0.65
  -6  -2  -5    0.82    0.59
  -6  -2  -5    0.34    0.67
   6   2   5   -0.02    0.59
   6   2   5    2.69    0.75
  -7  -2  -5    5.29    0.95
  -7  -2  -5    6.62    1.30
  -7  -2  -5    5.46    1.00
   7   2   5    4.67    1.14
   7   2   5    6.28    1.13
  -8  -2  -5    7.78    1.30
  -8  -2  -5    5.97    1.38
  -8  -2  -5    5.28    1.32
   8   2   5    5.57    1.15
   8   2   5    6.22    1.34
  -9  -2  -5    7.37    1.29
  -9  -2  -5    1.98    1.28
  -9  -2  -5    4.24    1.38
   9   2   5    5.05    1.29
   9   2   5    4.84    1.56
 -10  -2  -5   11.78    2.30
 -10  -2  -5   17.60    2.09
 -10  -2  -5   19.05    2.14
  10   2   5   15.27    2.07
  10   2   5   20.60    3.84
  11  -3  -5   11.94    2.14
  11  -3  -5   10.35    2.15
 -11   3   5   11.90    1.78
 -11   3   5   10.23    1.68
 -11   3   5    9.50    2.33
  10  -3  -5   -1.08    1.41
  10  -3  -5    0.63    1.42
  10  -3  -5    0.92    1.33
 -10   3   5    1.77    1.46
 -10   3   5   -1.12    1.55
 -10   3   5   -0.57    1.26
   9  -3  -5   23.12    2.04
   9  -3  -5   22.78    1.91
   9  -3  -5   22.62    2.11
  -9   3   5   23.26    1.87
  -9   3   5   24.50    1.74
  -9   3   5   23.00    2.12
   8  -3  -5    0.62    0.73
   8  -3  -5    0.01    0.87
   8  -3  -5    0.35    0.85
  -8   3   5   -0.42    0.74
  -8   3   5   -0.33    0.70
   7  -3  -5   19.39    1.42
   7  -3  -5   20.41    1.43
  -7   3   5   21.66    1.28
  -7   3   5   19.83    1.40
   6  -3  -5    6.57    0.89
   6  -3  -5    6.80    0.90
   6  -3  -5    6.42    0.96
  -6   3   5    7.05    0.89
  -6   3   5    7.89    0.79
   5  -3  -5    5.85    0.71
   5  -3  -5    5.06    0.78
   5  -3  -5    5.55    0.77
  -5   3   5    6.92    0.81
  -5   3   5    6.70    0.73
   4  -3  -5   15.51    0.95
   4  -3  -5   17.13    1.04
   4  -3  -5   15.67    0.85
  -4   3   5   15.17    0.91
  -4   3   5   15.11    0.97
   3  -3  -5   -0.27    0.30
   3  -3  -5   -0.25    0.32
   3  -3  -5   -0.27    0.22
  -3   3   5    0.34    0.34
  -3   3   5   -0.44    0.17
  -3   3   5   -0.41    0.27
   2  -3  -5  112.26    2.84
   2  -3  -5  106.14    2.47
   2  -3  -5  110.18    2.91
  -2   3   5  109.57    2.76
  -2   3   5  106.97    2.78
  -2   3   5  106.31    2.46
   1  -3  -5    4.33    0.51
   1  -3  -5    5.28    0.58
  -1   3   5    3.83    0.34
  -1   3   5    3.79    0.48
  -1   3   5    3.83    0.54
   0  -3  -5  147.40    3.54
   0  -3  -5  145.18    3.50
   0   3   5  151.23    3.52
   0   3   5  143.28    2.96
   0   3   5  145.45    3.53
   0   3   5  147.55    3.20
  -1  -3  -5    0.83    0.32
  -1  -3  -5    1.02    0.35
  -1  -3  -5    0.59    0.20
   1   3   5    0.74    0.34
   1   3   5    0.49    0.44
  -2  -3  -5   22.91    1.16
  -2  -3  -5   23.28    1.15
  -2  -3  -5   24.50    0.97
   2   3   5   24.18    1.20
   2   3   5   24.60    1.16
  -3  -3  -5   29.97    1.26
  -3  -3  -5   34.14    1.48
  -3  -3  -5   33.84    1.46
   3   3   5   34.60    1.44
   3   3   5   35.00    1.53
  -4  -3  -5    1.32    0.53
  -4  -3  -5    0.12    0.40
  -4  -3  -5   -0.74    0.38
   4   3   5   -0.13    0.41
   4   3   5    0.17    0.50
  -5  -3  -5   24.18    1.40
  -5  -3  -5   24.11    1.45
  -5  -3  -5   26.33    1.51
   5   3   5   23.47    1.42
   5   3   5   24.54    1.56
  -6  -3  -5    1.25    0.71
  -6  -3  -5    0.61    0.62
  -6  -3  -5   -0.59    0.69
   6   3   5    0.43    0.83
   6   3   5    1.07    0.67
  -7  -3  -5   25.79    1.83
  -7  -3  -5   24.22    1.78
  -7  -3  -5   24.49    1.86
   7   3   5   24.82    1.94
   7   3   5   24.53    1.74
  -8  -3  -5    0.49    1.07
  -8  -3  -5    2.42    1.15
  -8  -3  -5   -0.11    1.00
   8   3   5    0.74    1.26
   8   3   5   -0.61    0.95
  -9  -3  -5    8.78    1.78
  -9  -3  -5    9.37    1.69
  -9  -3  -5    7.50    1.90
   9   3   5   11.48    1.88
   9   3   5    8.04    1.62
 -10  -3  -5    0.37    2.14
 -10  -3  -5    1.49    1.88
 -10  -3  -5   -2.48    1.74
  10   3   5   -0.56    1.86
  11  -4  -5    6.63    2.19
  11  -4  -5    6.99    2.02
 -11   4   5    4.94    2.38
  10  -4  -5   -1.27    1.57
  10  -4  -5   -0.37    1.40
  10  -4  -5    1.70    1.42
 -10   4   5    1.31    1.30
 -10   4   5    0.67    1.08
 -10   4   5    1.00    1.45
   9  -4  -5    0.56    1.04
   9  -4  -5    2.82    1.31
   9  -4  -5    1.85    1.25
  -9   4   5    0.37    1.13
  -9   4   5    1.86    1.03
  -9   4   5    0.98    0.82
   8  -4  -5    1.13    1.09
   8  -4  -5    2.59    0.92
  -8   4   5    1.56    0.95
  -8   4   5    3.44    0.94
  -8   4   5    3.71    0.76
   7  -4  -5    1.10    0.73
   7  -4  -5    3.02    0.90
   7  -4  -5    2.06    0.73
  -7   4   5    1.07    0.83
  -7   4   5    0.75    0.55
  -7   4   5    1.75    0.69
   6  -4  -5   67.40    2.26
   6  -4  -5   70.55    2.60
   6  -4  -5   70.12    2.47
  -6   4   5   69.91    2.33
  -6   4   5   74.55    2.42
  -6   4   5   65.37    2.22
   5  -4  -5    0.72    0.89
   5  -4  -5    0.11    0.51
   5  -4  -5    0.83    0.58
  -5   4   5    0.44    0.42
  -5   4   5    0.33    0.42
   4  -4  -5   88.15    2.26
   4  -4  -5   82.73    2.59
   4  -4  -5   83.84    2.54
  -4   4   5   85.40    2.45
  -4   4   5   85.93    2.49
   3  -4  -5    0.34    0.42
   3  -4  -5    0.26    0.28
   3  -4  -5    0.40    0.42
  -3   4   5    1.20    0.40
  -3   4   5    0.27    0.21
  -3   4   5    0.72    0.47
   2  -4  -5   12.61    0.60
   2  -4  -5   13.09    0.88
   2  -4  -5   12.12    0.92
  -2   4   5   12.37    0.55
  -2   4   5   12.37    0.84
   1  -4  -5   -0.67    0.29
  -1   4   5    0.78    0.39
  -1   4   5    0.16    0.15
  -1   4   5    0.10    0.30
   0  -4  -5   17.81    1.04
   0  -4  -5   18.52    1.05
   0   4   5   19.79    0.76
   0   4   5   19.00    1.01
   0   4   5   18.12    1.05
  -1  -4  -5   59.74    2.04
  -1  -4  -5   59.03    1.49
  -1  -4  -5   60.82    2.03
   1   4   5   58.22    2.01
  -2  -4  -5   -0.15    0.40
  -2  -4  -5    0.32    0.40
  -2  -4  -5    0.22    0.26
   2   4   5   -0.33    0.37
   2   4   5   -0.19    0.42
  -3  -4  -5   56.96    1.85
  -3  -4  -5   60.66    2.21
  -3  -4  -5   57.66    2.14
   3   4   5   60.66    2.15
   3   4   5   56.93    2.18
  -4  -4  -5    3.29    0.65
  -4  -4  -5    3.35    0.76
  -4  -4  -5    3.18    0.75
   4   4   5    3.06    0.67
   4   4   5    3.70    0.74
  -5  -4  -5   78.77    2.65
  -5  -4  -5   77.83    2.85
   5   4   5   78.36    2.84
   5   4   5   75.74    2.85
  -6  -4  -5    4.35    1.00
  -6  -4  -5    3.14    0.90
  -6  -4  -5    3.75    1.02
   6   4   5    4.45    1.15
   6   4   5    2.06    0.91
  -7  -4  -5    3.28    1.08
  -7  -4  -5    2.04    1.09
  -7  -4  -5    1.65    1.10
   7   4   5    2.30    1.13
   7   4   5    2.12    0.94
  -8  -4  -5   17.72    1.95
  -8  -4  -5   17.84    2.15
  -8  -4  -5   18.94    2.27
   8   4   5   20.34    2.17
   8   4   5   16.11    2.07
  -9  -4  -5    1.73    1.70
  -9  -4  -5    2.78    1.70
  -9  -4  -5    0.89    1.74
   9   4   5    3.43    1.68
  10  -5  -5    6.37    1.63
  10  -5  -5    6.75    1.74
  10  -5  -5    4.33    1.73
 -10   5   5    4.52    1.56
 -10   5   5    6.83    1.24
 -10   5   5    2.69    1.04
   9  -5  -5    5.02    1.35
   9  -5  -5    4.92    1.36
   9  -5  -5    8.26    1.56
  -9   5   5    5.53    1.46
  -9   5   5    6.54    1.16
   8  -5  -5    3.47    1.02
   8  -5  -5    4.18    1.26
   8  -5  -5    5.73    1.10
  -8   5   5    3.17    0.97
  -8   5   5    4.01    1.06
  -8   5   5    5.30    0.78
   7  -5  -5   15.36    1.58
   7  -5  -5   18.49    1.29
   7  -5  -5   15.57    1.41
  -7   5   5   17.26    1.36
  -7   5   5   16.93    1.37
  -7   5   5   17.51    1.17
   6  -5  -5    0.12    0.61
   6  -5  -5    0.28    0.58
   6  -5  -5    0.20    0.52
  -6   5   5    0.01    0.50
  -6   5   5    0.46    0.50
  -6   5   5    0.26    0.59
   5  -5  -5    5.58    0.87
   5  -5  -5    5.35    0.90
   5  -5  -5    6.19    0.69
  -5   5   5    6.24    0.78
  -5   5   5    5.55    0.74
  -5   5   5    5.58    0.67
   4  -5  -5   24.53    1.42
   4  -5  -5   24.34    0.99
   4  -5  -5   25.19    1.37
  -4   5   5   25.55    0.98
  -4   5   5   26.41    1.21
  -4   5   5   22.93    1.26
   3  -5  -5    0.78    0.43
   3  -5  -5    0.24    0.51
   3  -5  -5    1.22    0.28
  -3   5   5    0.90    0.19
  -3   5   5    0.86    0.44
  -3   5   5    0.32    0.44
   2  -5  -5   44.31    1.76
   2  -5  -5   42.10    1.70
  -2   5   5   44.48    1.62
  -2   5   5   43.38    1.13
  -2   5   5   45.63    1.71
   1  -5  -5    8.31    0.82
   1  -5  -5    9.78    0.90
  -1   5   5    8.65    0.44
  -1   5   5    8.08    0.76
  -1   5   5    8.96    0.85
   0  -5  -5   33.69    1.53
   0  -5  -5   33.04    1.50
   0   5   5   34.58    1.48
   0   5   5   33.16    1.05
   0   5   5   32.27    1.52
  -1  -5  -5    2.82    0.61
  -1  -5  -5    4.38    0.71
   1   5   5    3.50    0.63
   1   5   5    3.57    0.70
  -2  -5  -5    4.59    0.87
  -2  -5  -5    5.63    0.82
  -2  -5  -5    5.74    0.54
   2   5   5    5.88    0.90
   2   5   5    5.59    0.79
  -3  -5  -5    8.54    1.04
  -3  -5  -5    5.83    0.69
  -3  -5  -5    7.37    1.00
   3   5   5    7.33    0.93
   3   5   5    6.20    1.01
  -4  -5  -5   -0.11    0.47
  -4  -5  -5    0.25    0.64
  -4  -5  -5   -1.25    0.59
   4   5   5    0.66    0.67
   4   5   5   -0.12    0.55
  -5  -5  -5   20.00    1.67
  -5  -5  -5   20.22    1.73
  -5  -5  -5   19.44    1.35
   5   5   5   18.02    1.70
   5   5   5   19.87    1.53
  -6  -5  -5    1.15    1.03
  -6  -5  -5    4.03    1.11
  -6  -5  -5    2.42    0.95
   6   5   5    1.13    1.01
   6   5   5    2.81    1.14
  -7  -5  -5   22.72    1.96
  -7  -5  -5   19.12    2.05
  -7  -5  -5   23.43    2.20
   7   5   5   20.47    2.18
   7   5   5   18.22    2.09
  -8  -5  -5    5.16    1.56
  -8  -5  -5   11.51    1.92
  -8  -5  -5    7.17    1.78
   8   5   5    7.36    1.80
   8   5   5    1.76    1.52
  -9  -5  -5    8.12    2.16
  -9  -5  -5   16.85    3.69
  -9  -5  -5   14.99    2.63
  10  -6  -5    2.06    1.99
  10  -6  -5    4.36    1.56
  10  -6  -5    2.10    1.57
 -10   6   5    0.38    0.93
 -10   6   5    3.19    1.71
   9  -6  -5    7.63    1.55
   9  -6  -5    8.59    1.73
   9  -6  -5    8.11    1.38
  -9   6   5    9.30    1.55
  -9   6   5    6.79    0.90
  -9   6   5    8.35    1.23
   8  -6  -5   11.65    1.50
   8  -6  -5   11.79    1.58
   8  -6  -5   12.35    1.56
  -8   6   5   11.52    1.12
  -8   6   5   11.16    1.36
  -8   6   5   11.30    1.37
   7  -6  -5    2.23    0.91
   7  -6  -5    1.46    0.71
   7  -6  -5    0.00    0.96
  -7   6   5    1.93    0.64
  -7   6   5    1.09    0.72
  -7   6   5    0.63    0.57
   6  -6  -5   78.19    2.94
   6  -6  -5   77.46    2.82
   6  -6  -5   84.12    2.61
  -6   6   5   79.27    2.51
  -6   6   5   78.62    2.43
   5  -6  -5   -0.21    0.36
   5  -6  -5   -0.16    0.56
   5  -6  -5    0.39    0.75
  -5   6   5   -0.53    0.44
  -5   6   5   -0.23    0.34
  -5   6   5    0.22    0.62
   4  -6  -5    2.33    0.71
   4  -6  -5    2.29    0.37
   4  -6  -5    2.21    0.71
  -4   6   5    1.77    0.28
  -4   6   5    1.91    0.62
  -4   6   5    3.05    0.57
   3  -6  -5    1.04    0.56
   3  -6  -5    0.58    0.56
  -3   6   5    0.54    0.46
  -3   6   5    1.36    0.63
   2  -6  -5    4.55    0.74
  -2   6   5    5.23    0.68
  -2   6   5    5.79    0.78
   1  -6  -5    9.98    1.01
   1  -6  -5    9.51    0.98
  -1   6   5    8.46    0.89
  -1   6   5   10.33    0.43
  -1   6   5   11.11    1.03
   0  -6  -5    2.56    0.68
   0  -6  -5    2.30    0.66
   0   6   5    2.99    0.36
   0   6   5    2.80    0.61
   0   6   5    2.53    0.69
  -1  -6  -5   34.08    1.76
  -1  -6  -5   36.07    1.82
   1   6   5   36.54    1.77
   1   6   5   40.96    1.79
  -2  -6  -5    0.91    0.32
  -2  -6  -5   -0.87    0.63
   2   6   5    1.25    0.73
  -3  -6  -5   38.17    2.00
  -3  -6  -5   34.95    1.39
   3   6   5   35.80    1.95
   3   6   5   36.27    1.91
  -4  -6  -5    0.75    0.61
  -4  -6  -5    1.64    0.92
  -4  -6  -5    1.61    0.93
   4   6   5    1.29    0.93
   4   6   5    1.54    0.76
  -5  -6  -5   10.86    1.49
  -5  -6  -5   12.16    1.58
  -5  -6  -5   11.98    1.36
   5   6   5   13.54    1.57
   5   6   5   12.55    1.55
  -6  -6  -5    1.64    1.00
  -6  -6  -5    2.99    1.30
  -6  -6  -5    0.67    1.21
   6   6   5    2.28    1.35
   6   6   5    2.74    1.15
  -7  -6  -5    4.18    1.63
  -7  -6  -5    2.55    1.37
  -7  -6  -5    4.81    1.59
   7   6   5    3.72    1.43
   7   6   5    3.90    1.61
  -8  -6  -5    9.43    1.98
  -8  -6  -5    9.16    2.31
   8   6   5   11.51    2.20
   8   6   5    8.94    2.04
   9  -7  -5    6.09    1.81
   9  -7  -5    4.18    1.55
  -9   7   5    3.43    1.39
   8  -7  -5    1.18    0.83
   8  -7  -5    1.03    1.36
   8  -7  -5    1.12    1.24
  -8   7   5    0.33    0.74
  -8   7   5   -0.67    0.88
  -8   7   5   -0.21    0.61
   7  -7  -5    5.86    0.83
   7  -7  -5    5.24    1.31
   7  -7  -5    8.04    1.24
  -7   7   5    4.94    0.72
  -7   7   5    5.46    0.88
   6  -7  -5    1.30    1.06
   6  -7  -5    1.50    0.50
   6  -7  -5    2.68    1.07
  -6   7   5    2.11    0.54
  -6   7   5    0.83    0.74
  -6   7   5    1.40    0.57
   5  -7  -5    3.53    0.92
   5  -7  -5    1.79    0.34
   5  -7  -5    1.85    0.84
  -5   7   5   -0.10    0.53
  -5   7   5    2.16    0.38
  -5   7   5    1.11    0.68
   4  -7  -5    7.79    1.09
   4  -7  -5    6.77    1.86
  -4   7   5    7.40    0.86
  -4   7   5    8.18    0.98
   3  -7  -5    0.89    0.65
   3  -7  -5    0.26    0.79
  -3   7   5    0.24    0.60
  -3   7   5   -0.27    0.48
   2  -7  -5   46.02    2.08
   2  -7  -5   44.72    2.09
  -2   7   5   46.24    1.83
  -2   7   5   44.98    1.93
   1  -7  -5   34.70    1.86
  -1   7   5   32.41    1.73
  -1   7   5   33.57    1.62
   0  -7  -5   12.34    1.31
   0  -7  -5   13.29    1.29
   0   7   5   12.40    0.57
   0   7   5   11.95    1.31
   0   7   5   13.08    1.26
  -1  -7  -5   -0.48    0.69
  -1  -7  -5    0.30    0.78
   1   7   5    0.09    0.32
   1   7   5    0.20    0.77
   1   7   5    0.21    0.63
  -2  -7  -5    9.11    1.31
  -2  -7  -5    7.64    1.23
  -2  -7  -5   11.38    0.61
   2   7   5   11.43    1.38
   2   7   5   10.73    1.36
  -3  -7  -5    6.39    1.27
  -3  -7  -5    7.16    1.22
  -3  -7  -5    6.77    0.72
   3   7   5    6.79    1.20
  -4  -7  -5   -1.10    1.01
  -4  -7  -5   -0.84    1.04
  -4  -7  -5   -1.38    0.57
   4   7   5    2.73    1.09
   4   7   5   -0.08    1.09
  -5  -7  -5    9.48    1.57
  -5  -7  -5    7.99    1.59
  -5  -7  -5    7.67    1.14
   5   7   5    7.52    1.59
   5   7   5    9.97    1.46
  -6  -7  -5    3.68    1.41
  -6  -7  -5    0.44    1.47
  -6  -7  -5    2.45    1.50
   6   7   5    1.53    1.37
   6   7   5    3.62    1.58
  -7  -7  -5    8.77    1.78
  -7  -7  -5    3.89    2.08
   7   7   5    9.44    1.90
   7   7   5    7.10    2.20
   9  -8  -5    3.21    2.03
   9  -8  -5    3.66    1.64
  -9   8   5    2.24    1.38
   8  -8  -5   16.70    1.96
   8  -8  -5   11.47    2.00
   8  -8  -5   12.42    1.29
  -8   8   5   12.73    1.37
   7  -8  -5   -2.49    1.33
   7  -8  -5    1.39    0.52
   7  -8  -5   -0.26    1.10
  -7   8   5    0.09    0.66
  -7   8   5   -1.25    0.53
  -7   8   5    0.22    0.48
   6  -8  -5   35.93    2.35
   6  -8  -5   35.67    2.21
  -6   8   5   33.21    1.75
   5  -8  -5   -0.60    0.86
   5  -8  -5    0.27    1.01
  -5   8   5    0.59    0.59
  -5   8   5    0.83    0.73
   4  -8  -5   32.75    2.10
   4  -8  -5   29.99    1.97
  -4   8   5   33.45    1.67
  -4   8   5   32.66    1.53
   3  -8  -5   -1.32    0.83
  -3   8   5   -0.18    0.56
  -3   8   5    0.67    0.74
   2  -8  -5   16.13    1.57
   2  -8  -5   15.62    1.93
  -2   8   5   16.73    1.31
  -2   8   5   15.85    1.39
   1  -8  -5   23.77    1.75
   1  -8  -5   24.44    1.75
  -1   8   5   25.41    1.71
  -1   8   5   22.74    1.54
   0  -8  -5   -2.12    0.75
   0  -8  -5    1.07    0.92
   0   8   5    0.01    0.16
   0   8   5   -0.26    0.82
   0   8   5    0.04    0.22
   0   8   5   -0.43    0.72
  -1  -8  -5   23.88    1.85
  -1  -8  -5   22.15    1.83
   1   8   5   23.42    1.79
   1   8   5   20.86    2.78
   1   8   5   23.34    0.94
   1   8   5   22.63    1.11
  -2  -8  -5   -0.25    0.99
  -2  -8  -5   -1.01    0.85
   2   8   5    0.43    1.08
   2   8   5    0.46    0.63
   2   8   5   -0.08    0.84
  -3  -8  -5   73.70    2.09
  -3  -8  -5   73.22    3.37
  -3  -8  -5   70.68    3.33
   3   8   5   75.49    3.25
   3   8   5   76.81    3.19
   3   8   5   74.75    2.65
  -4  -8  -5    1.84    1.23
  -4  -8  -5    1.00    0.67
  -4  -8  -5    2.41    1.44
   4   8   5    3.79    1.51
   4   8   5    0.67    1.13
  -5  -8  -5    2.50    1.69
  -5  -8  -5   11.05    1.81
  -5  -8  -5    5.74    1.03
   5   8   5    7.17    1.84
   5   8   5    9.01    1.76
   5   8   5    7.50    1.51
  -6  -8  -5   10.25    2.09
  -6  -8  -5    6.96    2.42
   6   8   5   12.50    2.29
   6   8   5   13.80    2.07
   8  -9  -5    1.55    1.95
   7  -9  -5   -0.97    1.63
   7  -9  -5    0.91    1.38
   6  -9  -5    1.05    1.25
   6  -9  -5    2.29    1.49
  -6   9   5   -0.12    0.42
  -6   9   5   -0.28    0.44
   5  -9  -5    5.40    1.43
   5  -9  -5    8.00    1.41
  -5   9   5    5.01    0.75
  -5   9   5    1.86    1.22
   4  -9  -5   13.26    1.66
  -4   9   5   15.18    1.22
  -4   9   5   13.43    1.38
   3  -9  -5    2.02    1.12
   3  -9  -5    1.55    1.04
  -3   9   5    0.93    0.67
  -3   9   5    1.82    0.95
   2  -9  -5    2.45    1.14
   2  -9  -5    3.70    1.18
  -2   9   5    3.51    1.10
  -2   9   5    5.47    0.96
   1  -9  -5    0.80    1.06
   1  -9  -5    3.52    1.17
  -1   9   5    2.01    0.89
  -1   9   5    2.89    1.09
   0  -9  -5   -1.46    1.04
   0  -9  -5    0.32    1.12
   0   9   5    1.13    1.12
  -1  -9  -5    1.43    1.20
  -1  -9  -5   -1.28    1.12
   1   9   5    0.88    0.47
   1   9   5    0.45    0.97
   1   9   5    0.52    0.34
   1   9   5   -0.23    1.20
  -2  -9  -5   -1.31    1.22
  -2  -9  -5    0.94    1.28
   2   9   5   -1.96    1.28
   2   9   5   -2.33    1.12
   2   9   5    0.71    0.92
   2   9   5    0.51    0.56
  -3  -9  -5   -0.92    1.34
  -3  -9  -5   -0.76    1.44
   3   9   5    0.76    1.41
   3   9   5   -0.08    1.48
   3   9   5    2.79    1.04
  -4  -9  -5    8.57    2.11
  -4  -9  -5    7.25    0.91
   4   9   5    9.25    1.92
   4   9   5    8.57    1.82
   4   9   5    6.34    1.82
  -5  -9  -5    5.37    1.07
   5   9   5    3.31    1.62
   6 -10  -5   26.88    2.66
   5 -10  -5    0.70    1.40
  -5  10   5   -0.01    0.46
  -5  10   5    0.42    0.51
   4 -10  -5   18.98    2.23
   4 -10  -5   20.72    2.17
  -4  10   5   18.13    1.36
  -4  10   5   21.32    1.76
   3 -10  -5    0.55    1.30
   3 -10  -5    2.24    1.35
  -3  10   5    0.78    0.84
  -3  10   5    1.00    1.09
   2 -10  -5   13.93    1.85
   2 -10  -5   10.93    1.79
  -2  10   5   16.26    1.94
  -2  10   5   11.57    1.30
   1 -10  -5   25.42    2.42
   1 -10  -5   18.05    2.09
   0 -10  -5    0.47    1.35
   0 -10  -5   -1.36    1.34
   0  10   5   -1.30    1.30
   0  10   5   -1.42    1.12
  -1 -10  -5   29.11    2.74
  -1 -10  -5   29.61    2.59
   1  10   5   28.06    2.50
   1  10   5   32.17    2.78
  -2 -10  -5    1.91    1.70
   2  10   5    5.62    1.83
   2  10   5    5.03    1.55
   2  10   5    0.38    0.52
   2  10   5    0.77    0.65
  -3 -10  -5   18.10    2.77
   3  10   5   21.72    2.50
   3  10   5   24.36    2.73
   4 -11  -5    2.82    1.98
   3 -11  -5    4.73    2.11
   3 -11  -5    8.94    2.17
   2 -11  -5    2.05    1.88
  -2  11   5    1.58    1.12
  -2  11   5    2.80    1.74
   1 -11  -5    8.26    2.01
  -1  11   5   12.59    1.66
  -1  11   5    6.37    1.57
   0 -11  -5    2.76    2.04
   0  11   5    0.21    1.51
   0  11   5    1.33    1.58
  -1 -11  -5   11.23    4.04
   1  11   5    5.45    2.00
   1  11   5    8.58    1.84
   0 -12   6   23.42    2.45
   0 -12   6   29.04    2.80
   1 -12   6    1.11    1.55
   1 -12   6    3.05    1.56
   2 -12   6   18.81    2.33
   2 -12   6   18.66    2.33
   3 -12   6   -1.89    1.24
   3 -12   6   -2.22    1.34
  -3 -11   6   21.66    2.63
   2  11  -6    1.16    0.81
   2  11  -6   -0.40    0.58
  -2 -11   6    0.91    1.63
  -2 -11   6    1.34    1.60
  -1 -11   6   10.31    1.70
  -1 -11   6    8.75    1.68
   0 -11   6    0.22    0.78
   0 -11   6    2.05    1.27
   0 -11   6   -0.61    1.24
   1 -11   6    3.52    0.80
   1 -11   6    4.87    1.21
   1 -11   6    3.87    1.24
   2 -11   6    2.09    0.74
   2 -11   6    1.83    1.15
   2 -11   6    1.76    1.08
   3 -11   6    3.36    1.04
   3 -11   6    2.79    0.81
   3 -11   6    3.18    1.06
   4 -11   6   24.06    1.77
   4 -11   6   19.68    2.03
   5 -11   6   -0.99    0.95
   6 -11   6    3.19    1.04
   6 -11   6    3.68    1.05
   5  10  -6    9.71    1.98
   5  10  -6    6.93    1.85
   5  10  -6    8.41    1.81
  -5 -10   6   12.68    2.52
   4  10  -6    9.58    1.66
   4  10  -6    8.93    1.72
  -4 -10   6    8.15    1.95
  -4 -10   6    4.02    1.78
   3  10  -6   13.99    1.53
   3  10  -6   11.67    1.27
   3  10  -6   11.86    1.46
  -3 -10   6   14.29    1.93
  -3 -10   6   12.80    1.86
   2  10  -6   14.70    1.17
   2  10  -6   15.57    1.50
  -2 -10   6   16.55    2.02
  -2 -10   6   17.94    2.07
   1  10  -6    0.55    0.61
  -1 -10   6    0.24    1.05
  -1 -10   6    2.05    1.18
   0 -10   6   36.19    2.06
   0 -10   6   45.54    2.52
   1 -10   6    2.62    0.76
   1 -10   6    0.26    1.39
   1 -10   6    1.53    0.94
   2 -10   6   30.50    1.77
   2 -10   6   32.25    1.59
   2 -10   6   32.74    1.77
   3 -10   6    0.44    0.69
   3 -10   6   -0.01    0.72
   3 -10   6    1.35    0.77
   4 -10   6    9.88    1.06
   4 -10   6   10.79    1.16
   4 -10   6   10.21    1.30
   5 -10   6    4.58    0.79
   5 -10   6    3.65    0.86
   6 -10   6    2.99    0.80
   6 -10   6    3.07    0.89
   7 -10   6   23.64    1.73
   7 -10   6   21.83    1.53
   7 -10   6   20.70    0.85
   6   9  -6    0.30    1.90
   6   9  -6   -1.56    1.83
   6   9  -6    2.93    1.59
  -6  -9   6   -2.55    2.00
   5   9  -6    0.53    1.48
   5   9  -6    1.92    1.30
   5   9  -6    3.36    1.43
  -5  -9   6    4.67    1.61
  -5  -9   6    1.75    1.65
   4   9  -6    0.87    1.25
   4   9  -6    0.94    1.17
  -4  -9   6    0.72    1.28
  -4  -9   6    0.94    1.42
   3   9  -6   14.61    1.67
   3   9  -6   14.39    1.54
  -3  -9   6    9.51    1.53
  -3  -9   6   11.18    1.62
   2   9  -6    1.83    0.78
   2   9  -6    1.57    0.60
   2   9  -6    1.38    0.76
  -2  -9   6    0.09    0.98
  -2  -9   6    0.89    1.00
   1   9  -6    3.09    0.72
   1   9  -6    3.34    0.41
   1   9  -6    3.51    0.48
  -1  -9   6    3.63    0.94
  -1  -9   6    4.50    0.93
   0   9  -6    0.05    0.42
   0  -9   6    0.27    0.70
   0  -9   6    0.92    0.79
   1  -9   6    0.08    0.56
   1  -9   6    0.68    0.67
   1  -9   6    0.21    0.58
   2  -9   6   -0.30    0.56
   2  -9   6    0.71    0.58
   2  -9   6    0.01    0.53
   3  -9   6    0.75    0.59
   3  -9   6    1.28    0.49
   3  -9   6    0.54    0.66
   4  -9   6   11.81    1.03
   4  -9   6   11.88    0.97
   4  -9   6   12.38    1.28
   5  -9   6    0.67    0.89
   5  -9   6    0.31    0.28
   5  -9   6    0.57    0.59
   5  -9   6   -0.06    0.50
   6  -9   6    8.82    0.73
   6  -9   6    8.23    0.95
   6  -9   6   10.21    1.00
   7  -9   6    2.32    0.82
   7  -9   6    2.44    0.60
   7  -9   6    0.55    0.65
   7  -9   6    1.39    0.74
   8  -9   6    2.55    0.88
   8  -9   6    2.95    0.95
   8  -9   6    2.19    0.86
   8  -9   6    3.48    1.02
   7   8  -6   12.10    2.22
   7   8  -6   12.29    2.05
   7   8  -6   11.66    2.11
  -7  -8   6   13.69    2.47
   6   8  -6    0.49    1.50
   6   8  -6   -1.55    1.37
   6   8  -6   -0.81    1.32
  -6  -8   6    3.20    1.58
  -6  -8   6    0.91    1.50
   5   8  -6    9.42    1.65
   5   8  -6   14.38    1.84
   5   8  -6   11.59    1.48
  -5  -8   6   13.95    1.68
  -5  -8   6    8.64    1.64
   4   8  -6   10.31    1.46
   4   8  -6   10.19    1.29
   4   8  -6    9.76    1.35
  -4  -8   6    7.53    1.42
  -4  -8   6   14.82    1.73
   3   8  -6   13.73    1.38
   3   8  -6   13.50    1.16
   3   8  -6   10.95    1.38
  -3  -8   6   15.27    1.54
  -3  -8   6   11.58    1.45
   2   8  -6   45.59    1.83
   2   8  -6   42.19    1.73
  -2  -8   6   38.40    2.07
  -2  -8   6   44.11    2.09
   1   8  -6    0.84    0.34
   1   8  -6    1.65    0.62
   1   8  -6    1.66    0.45
  -1  -8   6    1.32    0.66
  -1  -8   6    2.10    0.72
   0   8  -6   53.04    1.63
   0  -8   6   52.65    2.01
   0  -8   6   54.25    2.02
   1  -8   6   16.70    1.09
   1  -8   6   15.51    1.06
   2  -8   6   56.27    1.80
   2  -8   6   54.04    1.39
   2  -8   6   53.02    1.94
   2  -8   6   52.64    1.76
   3  -8   6    1.48    0.27
   3  -8   6    2.65    0.67
   3  -8   6    2.05    0.48
   3  -8   6    1.95    0.48
   4  -8   6   29.30    1.16
   4  -8   6   31.00    1.62
   4  -8   6   26.94    1.17
   4  -8   6   29.94    0.99
   5  -8   6   13.86    0.80
   5  -8   6   12.24    1.38
   5  -8   6   13.89    0.83
   5  -8   6   13.10    0.89
   6  -8   6    7.86    0.80
   6  -8   6    5.72    0.73
   6  -8   6    5.35    0.69
   7  -8   6   24.59    1.28
   7  -8   6   23.49    1.41
   7  -8   6   24.54    1.39
   8  -8   6    1.62    0.81
   8  -8   6   -0.95    0.69
   9  -8   6   28.76    2.06
   9  -8   6   29.56    1.82
   8   7  -6    0.63    1.75
   8   7  -6    0.88    1.89
   8   7  -6   -0.16    1.82
  -8  -7   6    2.17    2.20
   7   7  -6   -0.76    1.46
   7   7  -6   -0.24    1.43
   7   7  -6    2.80    1.47
  -7  -7   6    1.35    1.51
  -7  -7   6   -1.12    1.53
   6   7  -6    1.23    1.12
   6   7  -6    0.17    1.07
   6   7  -6   -0.62    1.28
  -6  -7   6    0.36    1.22
  -6  -7   6    1.33    1.22
   5   7  -6   23.03    1.78
   5   7  -6   23.68    1.89
   5   7  -6   23.18    1.96
  -5  -7   6   23.23    1.99
  -5  -7   6   23.67    1.99
   4   7  -6    6.74    1.10
   4   7  -6    6.11    1.03
   4   7  -6    7.52    1.02
  -4  -7   6    5.80    1.12
  -4  -7   6    6.46    1.11
   3   7  -6    7.78    0.99
   3   7  -6    7.46    0.87
   3   7  -6    8.31    1.03
  -3  -7   6    5.15    1.23
  -3  -7   6    9.77    1.21
   2   7  -6    9.43    1.08
   2   7  -6   11.89    0.84
   2   7  -6   10.31    0.99
  -2  -7   6    7.65    1.02
  -2  -7   6    9.24    1.04
   1   7  -6    6.96    0.64
   1   7  -6    6.71    0.52
   1   7  -6    7.13    0.77
  -1  -7   6    6.55    0.83
  -1  -7   6    6.17    0.80
   0   7  -6    1.78    0.42
   0  -7   6    1.56    0.36
   0  -7   6    0.50    0.43
   0  -7   6    1.16    0.42
   1  -7   6    6.19    0.52
   1  -7   6    6.08    0.68
   1  -7   6    6.64    0.67
   2  -7   6   -0.03    0.23
   2  -7   6    0.55    0.47
   2  -7   6    1.06    0.30
   2  -7   6    0.61    0.31
   3  -7   6   13.09    1.01
   3  -7   6   12.08    0.65
   3  -7   6   11.43    0.63
   4  -7   6    7.86    1.01
   4  -7   6    8.46    0.63
   4  -7   6    7.08    0.51
   4  -7   6    7.04    0.59
   5  -7   6    8.83    0.68
   5  -7   6    8.78    1.12
   5  -7   6    9.66    0.62
   5  -7   6    9.58    0.77
   6  -7   6    3.40    0.50
   6  -7   6    3.55    0.57
   6  -7   6    3.73    1.01
   7  -7   6    1.82    0.61
   7  -7   6    1.34    0.51
  -8   7  -6    1.51    1.10
   8  -7   6   -0.05    0.75
   8  -7   6    0.71    0.63
  -9   7  -6    1.16    1.43
   9  -7   6    0.10    0.80
 -10   7  -6   13.96    2.16
  10  -7   6    6.80    1.36
  10  -7   6    6.11    1.49
   9   6  -6   18.73    2.77
   8   6  -6    1.70    1.61
   8   6  -6    0.74    1.46
   8   6  -6   -0.41    1.57
  -8  -6   6    3.14    1.53
  -8  -6   6    1.98    1.46
   7   6  -6   28.47    2.41
   7   6  -6   28.72    2.59
   7   6  -6   28.85    2.31
  -7  -6   6   30.81    2.42
  -7  -6   6   36.20    2.47
   6   6  -6    4.21    0.99
   6   6  -6    4.48    1.18
   6   6  -6    3.63    1.15
  -6  -6   6    2.45    1.20
  -6  -6   6    2.74    1.15
   5   6  -6   23.18    1.61
   5   6  -6   23.31    2.23
   5   6  -6   22.38    2.00
  -5  -6   6   23.83    1.86
  -5  -6   6   27.11    1.87
   4   6  -6   21.81    1.55
   4   6  -6   24.08    1.57
   4   6  -6   21.95    1.35
  -4  -6   6   20.09    1.57
  -4  -6   6   21.22    1.55
   3   6  -6   17.09    1.23
   3   6  -6   16.68    1.08
   3   6  -6   18.48    1.22
  -3  -6   6   18.76    1.34
  -3  -6   6   15.55    1.24
   2   6  -6   33.07    1.28
   2   6  -6   33.12    1.41
   2   6  -6   32.50    1.40
  -2  -6   6   31.79    1.49
  -2  -6   6   32.95    1.54
   1   6  -6    1.60    0.39
   1   6  -6    1.07    0.40
  -1  -6   6    1.91    0.40
  -1  -6   6    1.18    0.44
  -1  -6   6    1.14    0.43
   0   6  -6   39.60    1.33
   0  -6   6   40.75    1.41
   0  -6   6   37.77    1.39
   0  -6   6   39.55    1.32
   1  -6   6    1.36    0.31
   1  -6   6    1.40    0.34
   1  -6   6    1.88    0.36
   2  -6   6   26.92    0.89
   2  -6   6   27.93    0.99
   2  -6   6   26.94    0.89
   2  -6   6   26.69    1.27
   3  -6   6   15.90    0.78
   3  -6   6   17.90    0.60
   3  -6   6   16.52    0.62
   3  -6   6   16.25    1.04
   4  -6   6   18.59    1.24
   4  -6   6   17.13    0.90
   4  -6   6   16.85    0.64
   4  -6   6   17.01    0.62
   5  -6   6   13.02    0.70
   5  -6   6   13.86    0.65
   5  -6   6   14.65    1.30
   6  -6   6    1.44    0.48
   6  -6   6    2.01    0.38
   6  -6   6    4.27    0.98
  -7   6  -6   15.37    1.50
   7  -6   6   16.35    1.12
   7  -6   6   16.17    0.94
  -8   6  -6    1.42    1.06
   8  -6   6   -0.81    0.72
   8  -6   6    0.08    0.56
  -9   6  -6   23.24    2.43
   9  -6   6   26.42    2.75
   9  -6   6   25.75    1.62
 -10   6  -6    0.86    1.80
  10  -6   6    0.75    1.15
  10  -6   6    2.77    1.26
   9   5  -6    0.67    1.68
   9   5  -6    0.69    1.82
   9   5  -6   -0.34    1.60
  -9  -5   6    0.22    1.85
   8   5  -6    1.82    1.44
   8   5  -6    0.27    1.30
   8   5  -6   -0.81    1.24
  -8  -5   6    1.22    1.44
  -8  -5   6    1.37    1.33
   7   5  -6   -0.06    0.94
   7   5  -6    2.08    1.10
   7   5  -6    0.15    1.03
  -7  -5   6   -1.35    1.02
  -7  -5   6    1.26    1.01
   6   5  -6    6.41    1.06
   6   5  -6    6.44    1.21
   6   5  -6    6.24    1.24
  -6  -5   6    6.79    1.15
  -6  -5   6    6.03    1.16
   5   5  -6   34.08    1.91
   5   5  -6   35.85    1.80
   5   5  -6   31.95    1.81
  -5  -5   6   33.24    1.89
  -5  -5   6   32.89    1.86
   4   5  -6   20.98    1.35
   4   5  -6   19.84    1.25
   4   5  -6   20.37    1.33
  -4  -5   6   18.42    1.35
  -4  -5   6   19.04    1.36
   3   5  -6    0.67    0.49
   3   5  -6    1.14    0.45
   3   5  -6    1.99    0.56
  -3  -5   6    1.16    0.55
  -3  -5   6    0.64    0.57
   2   5  -6   15.13    0.83
   2   5  -6   14.50    0.90
   2   5  -6   15.86    0.95
  -2  -5   6   15.48    0.93
  -2  -5   6   14.85    0.96
  -2  -5   6   15.25    1.01
   1   5  -6   16.37    0.89
   1   5  -6   16.77    0.76
   1   5  -6   16.70    0.69
  -1  -5   6   15.87    0.88
  -1  -5   6   17.22    0.91
  -1  -5   6   16.33    0.92
   0   5  -6    0.56    0.30
   0  -5   6    0.86    0.29
   0  -5   6    0.19    0.24
   0  -5   6    0.73    0.28
  -1   5  -6   -0.02    0.27
   1  -5   6    0.03    0.18
   1  -5   6    0.53    0.18
   1  -5   6    0.35    0.23
   2  -5   6   10.94    0.86
   2  -5   6    9.81    0.37
   2  -5   6   11.00    0.64
   2  -5   6   10.16    0.36
   3  -5   6   10.44    0.65
   3  -5   6    9.94    0.87
   4  -5   6   29.21    0.76
   4  -5   6   30.03    1.44
   4  -5   6   29.60    0.78
  -5   5  -6    5.90    0.79
   5  -5   6    5.37    0.50
   5  -5   6    5.77    0.41
   5  -5   6    5.25    0.83
  -6   5  -6   17.61    1.43
   6  -5   6   20.10    0.98
   6  -5   6   17.71    0.84
   6  -5   6   18.07    1.46
  -7   5  -6    4.20    0.97
   7  -5   6    3.01    0.59
   7  -5   6    3.71    0.69
  -8   5  -6    0.39    0.97
   8  -5   6    1.99    0.75
   8  -5   6   -0.02    0.54
  -9   5  -6    0.95    1.27
   9  -5   6   -0.67    0.75
 -10   5  -6   -0.11    1.66
  10  -5   6    3.38    1.31
  10  -5   6    1.11    1.13
 -11   5  -6    4.83    2.64
  11  -5   6    3.38    1.73
  11  -5   6    5.10    1.49
  10   4  -6    9.99    2.43
 -10  -4   6    6.13    2.38
   9   4  -6   14.59    1.89
   9   4  -6   13.14    1.84
   9   4  -6   15.34    2.05
  -9  -4   6   14.83    2.08
  -9  -4   6   14.85    1.98
   8   4  -6    2.24    1.33
   8   4  -6    1.60    1.21
   8   4  -6    2.97    1.16
  -8  -4   6    4.51    1.25
  -8  -4   6    0.80    1.22
   7   4  -6   31.44    2.14
   7   4  -6   31.58    1.98
   7   4  -6   30.29    2.12
  -7  -4   6   28.67    1.92
  -7  -4   6   34.77    2.14
   6   4  -6    2.87    0.90
   6   4  -6    2.30    0.93
   6   4  -6    4.02    0.83
  -6  -4   6    4.03    0.93
   5   4  -6   13.25    1.11
   5   4  -6   16.06    1.32
   5   4  -6   15.50    1.19
  -5  -4   6   13.60    1.24
  -5  -4   6   12.76    1.19
   4   4  -6    6.36    0.79
   4   4  -6    5.36    0.80
   4   4  -6    6.80    0.79
  -4  -4   6    8.58    0.93
  -4  -4   6    8.55    1.00
   3   4  -6   78.50    2.29
   3   4  -6   77.99    2.33
   3   4  -6   71.96    2.32
  -3  -4   6   81.02    2.40
  -3  -4   6   75.33    2.39
  -3  -4   6   74.97    2.36
   2   4  -6   21.75    0.94
   2   4  -6   22.03    1.11
   2   4  -6   23.29    1.03
  -2  -4   6   19.61    1.06
  -2  -4   6   21.44    1.04
  -2  -4   6   22.41    1.08
   1   4  -6    0.54    0.25
   1   4  -6    0.61    0.19
   1   4  -6    0.92    0.34
  -1  -4   6    0.88    0.27
  -1  -4   6    0.70    0.30
  -1  -4   6    0.78    0.31
   0   4  -6  113.24    2.67
   0  -4   6  110.05    2.65
   0  -4   6  111.68    2.50
   0  -4   6  109.15    2.51
  -1   4  -6    4.23    0.46
   1  -4   6    3.42    0.23
   1  -4   6    3.90    0.25
   1  -4   6    3.36    0.41
   2  -4   6   10.77    0.77
   2  -4   6   10.63    0.61
   3  -4   6   22.52    1.15
  -4   4  -6   32.39    1.45
   4  -4   6   32.30    1.49
   4  -4   6   33.07    0.85
   4  -4   6   32.87    0.82
  -5   4  -6   43.63    1.82
   5  -4   6   42.48    1.23
   5  -4   6   42.09    1.26
   5  -4   6   41.40    1.85
  -6   4  -6    8.06    1.05
   6  -4   6    5.85    0.58
   6  -4   6    6.97    0.70
   6  -4   6    9.22    1.19
  -7   4  -6   74.03    2.84
   7  -4   6   73.64    2.32
   7  -4   6   72.07    2.21
  -8   4  -6    0.32    0.89
   8  -4   6   -0.23    0.71
   8  -4   6   -0.48    0.54
  -9   4  -6   27.40    2.28
   9  -4   6   24.58    1.90
   9  -4   6   26.85    1.68
 -10   4  -6   -1.76    1.47
  10  -4   6   -0.34    1.02
  10  -4   6    0.57    1.21
 -11   4  -6   17.36    2.80
  11  -4   6   18.29    2.11
  11  -4   6   19.29    2.22
  10   3  -6    2.93    1.89
 -10  -3   6   -0.05    1.78
 -10  -3   6   -1.36    1.77
   9   3  -6    1.68    1.45
   9   3  -6    2.23    1.45
   9   3  -6    3.07    1.33
  -9  -3   6    2.53    1.43
  -9  -3   6    3.52    1.39
   8   3  -6    6.15    1.40
   8   3  -6    5.77    1.22
   8   3  -6    4.21    1.31
  -8  -3   6    9.13    1.44
  -8  -3   6    7.81    1.47
   7   3  -6   -0.82    0.63
   7   3  -6   -0.56    0.85
   7   3  -6   -0.61    0.87
  -7  -3   6    0.86    0.86
  -7  -3   6   -0.82    0.79
   6   3  -6   12.87    1.54
   6   3  -6   12.52    1.21
  -6  -3   6   12.32    1.84
  -6  -3   6   10.94    1.27
   5   3  -6    1.99    0.67
   5   3  -6    2.80    0.74
   5   3  -6    2.77    0.60
  -5  -3   6    2.52    0.72
  -5  -3   6    1.67    0.58
   4   3  -6   23.12    1.21
   4   3  -6   22.37    1.25
   4   3  -6   22.39    1.28
  -4  -3   6   21.58    1.24
  -4  -3   6   21.03    1.23
   3   3  -6    2.17    0.45
   3   3  -6    2.73    0.55
   3   3  -6    2.49    0.59
  -3  -3   6    2.67    0.50
  -3  -3   6    2.11    0.49
  -3  -3   6    2.65    0.47
   2   3  -6   19.03    0.93
   2   3  -6   19.48    0.86
   2   3  -6   19.59    1.00
  -2  -3   6   20.37    0.95
  -2  -3   6   20.21    0.99
  -2  -3   6   18.44    0.93
   1   3  -6    2.28    0.40
   1   3  -6    2.13    0.33
   1   3  -6    1.85    0.27
  -1  -3   6    2.06    0.34
  -1  -3   6    1.86    0.36
  -1  -3   6    2.00    0.35
   0   3  -6    0.29    0.26
   0  -3   6    0.01    0.14
   0  -3   6   -0.02    0.17
   0  -3   6    0.17    0.20
  -1   3  -6   32.05    1.09
   1  -3   6   30.63    1.06
   1  -3   6   30.53    0.65
   2  -3   6    0.80    0.27
   2  -3   6    1.12    0.40
   3  -3   6   57.53    2.78
  -4   3  -6   24.00    1.24
   4  -3   6   23.17    0.78
   4  -3   6   23.42    0.75
   4  -3   6   23.35    1.27
  -5   3  -6   60.73    2.18
   5  -3   6   55.99    2.19
   5  -3   6   59.73    1.64
   5  -3   6   60.29    1.68
  -6   3  -6    1.43    0.59
   6  -3   6    0.63    0.32
   6  -3   6   -0.13    0.70
  -7   3  -6    1.00    0.69
   7  -3   6    0.19    0.44
   7  -3   6    0.87    0.55
  -8   3  -6   -0.12    0.90
   8  -3   6    0.38    0.73
   8  -3   6    0.87    0.54
  -9   3  -6    7.86    1.54
   9  -3   6    5.32    0.94
   9  -3   6    2.30    1.11
 -10   3  -6    1.66    1.55
  10  -3   6    4.00    1.46
  10  -3   6    3.57    1.23
  11  -3   6    0.88    1.83
  11  -3   6    1.20    1.49
 -11  -2   6    7.35    2.60
  10   2  -6    1.20    1.76
  10   2  -6    2.96    1.76
  10   2  -6    1.74    1.52
 -10  -2   6   -1.56    1.50
 -10  -2   6   -1.30    1.58
   9   2  -6   11.84    1.68
   9   2  -6   11.55    1.74
   9   2  -6    9.81    1.51
  -9  -2   6   11.86    1.67
  -9  -2   6    8.11    1.55
   8   2  -6    1.20    1.02
   8   2  -6    1.17    1.06
   8   2  -6    1.48    0.84
  -8  -2   6   -0.22    0.93
  -8  -2   6    0.82    0.98
   7   2  -6   56.79    2.50
   7   2  -6   49.92    2.43
  -7  -2   6   56.17    2.42
  -7  -2   6   54.72    2.95
   6   2  -6    0.95    0.72
   6   2  -6    0.49    0.47
   6   2  -6    1.05    0.71
  -6  -2   6    1.87    0.69
  -6  -2   6    0.77    0.62
   5   2  -6   31.12    1.56
   5   2  -6   32.86    1.62
   5   2  -6   31.38    1.48
  -5  -2   6   30.78    1.54
  -5  -2   6   30.22    1.54
   4   2  -6   61.73    2.09
   4   2  -6   61.31    2.03
   4   2  -6   62.49    2.10
  -4  -2   6   63.22    2.11
  -4  -2   6   62.74    2.08
  -4  -2   6   61.48    2.10
   3   2  -6    1.69    0.39
   3   2  -6    2.02    0.49
   3   2  -6    1.67    0.47
  -3  -2   6    0.82    0.34
  -3  -2   6    1.94    0.43
  -3  -2   6    1.67    0.43
   2   2  -6   51.48    1.62
   2   2  -6   52.80    1.57
   2   2  -6   51.19    1.51
  -2  -2   6   52.56    1.62
  -2  -2   6   51.02    1.57
  -2  -2   6   52.39    1.61
   1   2  -6   14.79    0.60
   1   2  -6   14.32    0.65
   1   2  -6   14.37    0.75
  -1  -2   6   14.54    0.69
  -1  -2   6   14.73    0.74
  -1  -2   6   14.24    0.68
   0   2  -6   37.48    0.86
   0   2  -6   37.74    1.21
   0  -2   6   36.44    1.00
   0  -2   6   35.67    1.18
   0  -2   6   37.12    1.00
   1  -2   6    3.41    0.39
   1  -2   6    4.31    0.21
   1  -2   6    4.11    0.22
   2  -2   6  118.94    2.36
   2  -2   6  123.69    3.01
   2  -2   6  119.54    2.35
  -3   2  -6   11.51    0.80
   3  -2   6   10.92    0.48
   3  -2   6   10.03    0.44
   3  -2   6   10.74    0.78
  -4   2  -6   35.10    1.49
   4  -2   6   32.09    1.48
   4  -2   6   35.21    1.13
   4  -2   6   36.14    1.10
  -5   2  -6   25.15    1.39
   5  -2   6   26.31    1.10
   5  -2   6   25.96    1.45
   5  -2   6   25.00    1.03
  -6   2  -6    0.73    0.61
  -6   2  -6    0.31    0.11
   6  -2   6    0.34    0.44
   6  -2   6    0.37    0.37
  -7   2  -6    7.95    1.10
  -7   2  -6    5.72    0.45
  -7   2  -6    5.93    0.38
   7  -2   6    7.34    0.90
   7  -2   6    5.60    0.85
  -8   2  -6    3.52    1.03
  -8   2  -6    1.92    0.32
  -8   2  -6    1.79    0.38
   8  -2   6    2.64    0.90
   8  -2   6    3.02    0.81
  -9   2  -6   26.59    2.16
  -9   2  -6   23.65    0.85
  -9   2  -6   23.98    0.92
   9  -2   6   23.64    2.00
 -10   2  -6   -1.53    1.07
  10  -2   6    2.90    1.34
  10  -2   6    1.09    1.15
 -11   2  -6    0.86    2.47
  11  -2   6    6.74    1.82
  11  -2   6    7.04    1.91
  11   1  -6    8.73    2.36
 -11  -1   6    6.16    2.04
 -11  -1   6   10.11    2.29
  10   1  -6   -2.25    1.58
  10   1  -6   -1.79    1.50
  10   1  -6    0.78    1.33
 -10  -1   6   -0.46    1.47
 -10  -1   6    2.25    1.42
   9   1  -6    4.92    1.40
   9   1  -6    4.39    1.50
   9   1  -6    4.27    1.18
  -9  -1   6    4.55    1.36
  -9  -1   6    4.05    1.29
   8   1  -6    1.20    0.97
   8   1  -6    1.49    0.81
   8   1  -6    1.58    0.91
  -8  -1   6    1.68    0.95
  -8  -1   6    1.38    0.97
   7   1  -6    1.27    0.76
   7   1  -6    2.48    0.81
   7   1  -6    1.68    0.74
  -7  -1   6    1.69    0.75
   6   1  -6   28.32    1.61
   6   1  -6   27.71    1.61
   6   1  -6   27.12    1.50
  -6  -1   6   27.12    1.55
  -6  -1   6   28.51    1.58
   5   1  -6    8.10    0.83
   5   1  -6    8.14    0.81
   5   1  -6    7.45    0.91
  -5  -1   6    6.72    0.82
  -5  -1   6    7.02    0.83
   4   1  -6   39.79    1.51
   4   1  -6   38.73    1.54
   4   1  -6   39.04    1.59
  -4  -1   6   39.87    1.54
  -4  -1   6   38.70    1.52
  -4  -1   6   39.65    1.54
   3   1  -6    4.16    0.49
   3   1  -6    3.06    0.54
   3   1  -6    3.72    0.55
  -3  -1   6    3.37    0.53
  -3  -1   6    3.79    0.50
  -3  -1   6    4.46    0.49
   2   1  -6   89.27    2.36
   2   1  -6   92.21    2.32
   2   1  -6   86.98    2.24
  -2  -1   6   93.82    2.36
  -2  -1   6   89.90    2.32
  -2  -1   6   89.53    2.29
   1   1  -6    0.42    0.24
   1   1  -6    0.07    0.20
   1   1  -6    0.61    0.20
  -1  -1   6    0.27    0.23
  -1  -1   6    0.30    0.20
  -1  -1   6    0.36    0.25
   0   1  -6    4.62    0.31
   0   1  -6    4.86    0.43
   0  -1   6    5.56    0.39
   0  -1   6    5.00    0.41
   0  -1   6    4.46    0.37
  -1   1  -6   61.04    1.35
  -1   1  -6   62.22    1.35
   1  -1   6   62.26    1.47
   1  -1   6   63.25    1.48
   1  -1   6   64.96    1.74
  -2   1  -6    0.14    0.11
  -2   1  -6   -0.11    0.23
  -2   1  -6    0.00    0.08
   2  -1   6    0.02    0.31
   2  -1   6    0.16    0.18
   2  -1   6    0.17    0.13
  -3   1  -6   62.66    1.42
  -3   1  -6   60.52    1.93
  -3   1  -6   61.91    1.41
   3  -1   6   62.01    1.62
   3  -1   6   65.75    1.99
   3  -1   6   64.29    1.67
  -4   1  -6    9.37    0.47
  -4   1  -6   10.28    0.51
  -4   1  -6    9.60    0.83
   4  -1   6    9.73    0.79
   4  -1   6    9.75    0.62
   4  -1   6    9.86    0.68
  -5   1  -6   12.67    1.02
  -5   1  -6   14.51    0.68
  -5   1  -6   14.98    0.71
   5  -1   6   13.06    1.14
   5  -1   6   14.63    0.95
   5  -1   6   15.32    0.87
  -6   1  -6    2.48    0.44
  -6   1  -6    2.54    0.69
  -6   1  -6    2.43    0.41
   6  -1   6    2.27    0.58
   6  -1   6    2.71    0.59
  -7   1  -6   14.37    0.87
  -7   1  -6   14.13    0.92
  -7   1  -6   15.29    1.43
   7  -1   6   15.45    1.15
   7  -1   6   15.63    1.28
  -8   1  -6    0.02    0.45
  -8   1  -6    0.41    0.84
   8  -1   6    0.62    0.71
   8  -1   6    0.20    0.84
  -9   1  -6    1.58    1.09
  -9   1  -6    1.61    0.74
  -9   1  -6    1.13    0.61
   9  -1   6    2.04    1.16
   9  -1   6    2.26    0.98
 -10   1  -6   27.98    2.62
  10  -1   6   24.80    2.25
  10  -1   6   27.92    2.47
 -11   1  -6   -0.20    2.47
 -11   1  -6    1.56    1.40
  11  -1   6   -3.39    1.59
  11  -1   6    2.61    1.93
  11   0  -6   10.13    2.16
 -11   0   6   11.49    2.17
 -11   0   6   18.07    2.25
 -11   0   6   11.46    2.60
  10   0  -6   -0.47    1.53
  10   0  -6   -0.27    1.50
  10   0  -6   -0.15    1.28
 -10   0   6    1.38    1.37
 -10   0   6   -0.01    1.43
   9   0  -6   33.88    2.37
   9   0  -6   27.55    2.37
   9   0  -6   34.65    2.26
  -9   0   6   32.87    2.21
  -9   0   6   36.56    2.22
   8   0  -6    2.81    1.07
   8   0  -6    4.12    0.93
   8   0  -6    5.56    1.24
  -8   0   6    4.59    1.05
   7   0  -6   35.56    1.82
   7   0  -6   33.93    1.98
  -7   0   6   35.03    1.82
  -7   0   6   35.69    1.84
   6   0  -6    1.61    0.69
   6   0  -6    1.23    0.55
   6   0  -6    2.30    0.65
  -6   0   6    2.33    0.62
  -6   0   6    2.60    0.65
   5   0  -6   14.80    1.01
   5   0  -6   16.34    1.06
   5   0  -6   14.46    1.10
  -5   0   6   14.79    1.04
  -5   0   6   13.89    1.03
   4   0  -6   12.51    0.92
   4   0  -6   11.15    0.88
   4   0  -6   13.13    0.86
  -4   0   6   13.56    0.90
  -4   0   6   11.99    0.85
  -4   0   6   10.71    0.76
   3   0  -6    8.71    0.72
   3   0  -6    9.42    0.67
   3   0  -6    9.92    0.73
  -3   0   6    8.38    0.68
  -3   0   6    8.94    0.67
  -3   0   6    9.36    0.72
   2   0  -6   49.50    1.53
   2   0  -6   47.65    1.51
   2   0  -6   50.39    1.48
  -2   0   6   50.82    1.51
  -2   0   6   46.90    1.49
  -2   0   6   47.08    1.50
   1   0  -6    6.22    0.47
   1   0  -6    5.84    0.44
   1   0  -6    5.78    0.51
  -1   0   6    6.06    0.44
  -1   0   6    5.63    0.48
  -1   0   6    6.66    0.52
   0   0  -6   37.83    1.22
   0   0  -6   37.95    1.11
   0   0   6   39.28    1.21
   0   0   6   37.12    1.15
   0   0   6   38.22    1.17
  -1   0  -6    7.45    0.45
  -1   0  -6    7.42    0.47
   1   0   6    7.71    0.58
   1   0   6    8.13    0.52
   1   0   6    8.32    0.48
   1   0   6    8.55    0.55
  -2   0  -6  173.23    3.63
  -2   0  -6  171.31    3.61
  -2   0  -6  168.16    3.86
   2   0   6  170.34    3.70
   2   0   6  174.25    3.90
   2   0   6  170.31    3.73
  -3   0  -6   13.67    0.69
  -3   0  -6   15.19    0.88
  -3   0  -6   14.05    0.68
   3   0   6   14.12    0.73
   3   0   6   14.40    0.90
   3   0   6   13.16    0.76
  -4   0  -6    1.61    0.33
  -4   0  -6    0.97    0.38
  -4   0  -6    1.14    0.34
   4   0   6    1.41    0.49
   4   0   6    2.06    0.54
   4   0   6    1.69    0.37
  -5   0  -6   48.85    1.96
  -5   0  -6   50.01    1.62
  -5   0  -6   49.92    1.61
   5   0   6   47.58    1.78
   5   0   6   53.64    1.82
  -6   0  -6    0.28    0.44
  -6   0  -6    0.77    0.61
  -6   0  -6    0.54    0.39
   6   0   6    0.35    0.54
   6   0   6    0.32    0.47
  -7   0  -6   30.37    1.41
  -7   0  -6   31.58    1.50
  -7   0  -6   31.01    1.91
   7   0   6   35.46    1.75
   7   0   6   28.78    1.69
  -8   0  -6    0.36    0.70
  -8   0  -6    1.20    0.64
  -8   0  -6   -2.34    0.85
   8   0   6    1.24    0.89
  -9   0  -6   36.61    2.00
  -9   0  -6   34.49    1.83
  -9   0  -6   35.92    2.51
   9   0   6   36.39    2.29
   9   0   6   32.71    2.36
 -10   0  -6    0.11    1.47
 -10   0  -6    3.76    1.10
 -10   0  -6    2.97    1.29
  10   0   6    0.39    1.31
  10   0   6    3.75    1.60
  11   0   6    2.81    1.98
  11  -1  -6    7.33    2.10
 -11   1   6   10.37    2.56
 -11   1   6    8.53    2.06
 -11   1   6    8.25    1.92
  10  -1  -6    1.60    1.55
  10  -1  -6    1.37    1.27
  10  -1  -6    1.50    1.38
 -10   1   6    5.25    1.87
 -10   1   6    1.89    1.35
 -10   1   6    2.72    1.34
   9  -1  -6    0.40    1.07
   9  -1  -6   -1.20    1.06
   9  -1  -6    1.62    1.04
  -9   1   6   -0.48    1.04
  -9   1   6    2.07    1.10
   8  -1  -6    4.60    1.04
   8  -1  -6    3.44    1.02
   8  -1  -6    2.61    1.02
  -8   1   6    4.78    1.03
  -8   1   6    3.60    1.07
   7  -1  -6    0.44    0.75
   7  -1  -6    0.26    0.67
   7  -1  -6    0.22    0.66
  -7   1   6   -1.41    0.58
  -7   1   6   -0.56    0.58
   6  -1  -6   25.38    1.43
   6  -1  -6   24.13    1.47
   6  -1  -6   25.40    1.52
  -6   1   6   26.09    1.40
  -6   1   6   23.96    1.37
   5  -1  -6    0.58    0.46
   5  -1  -6   -0.07    0.44
   5  -1  -6    0.59    0.41
  -5   1   6    1.23    0.49
  -5   1   6    0.55    0.43
   4  -1  -6   99.75    2.73
   4  -1  -6   98.41    2.81
   4  -1  -6  102.22    2.77
  -4   1   6  101.07    2.75
  -4   1   6  102.81    2.74
  -4   1   6  101.97    2.79
   3  -1  -6    1.49    0.46
   3  -1  -6    1.57    0.40
   3  -1  -6    2.37    0.44
  -3   1   6    1.67    0.38
  -3   1   6    2.29    0.44
  -3   1   6    1.74    0.44
   2  -1  -6   14.43    0.81
   2  -1  -6   13.76    0.72
   2  -1  -6   14.23    0.75
  -2   1   6   13.70    0.77
  -2   1   6   12.94    0.69
  -2   1   6   14.51    0.76
   1  -1  -6    0.25    0.25
   1  -1  -6   -0.06    0.21
   1  -1  -6   -0.20    0.20
  -1   1   6   -0.05    0.18
  -1   1   6    0.13    0.24
  -1   1   6    0.09    0.20
   0  -1  -6    1.71    0.35
   0  -1  -6    1.66    0.33
   0   1   6    1.47    0.35
   0   1   6    1.53    0.30
   0   1   6    1.48    0.28
  -1  -1  -6   86.40    2.16
  -1  -1  -6   86.78    2.17
   1   1   6   87.83    2.15
   1   1   6   83.61    2.21
   1   1   6   84.35    2.18
  -2  -1  -6    5.98    0.52
  -2  -1  -6    5.04    0.48
  -2  -1  -6    6.38    0.58
   2   1   6    6.03    0.56
   2   1   6    6.08    0.58
   2   1   6    5.77    0.53
  -3  -1  -6   75.69    2.20
  -3  -1  -6   75.66    2.10
  -3  -1  -6   75.10    2.07
   3   1   6   75.76    2.19
   3   1   6   74.09    2.45
   3   1   6   74.91    2.22
  -4  -1  -6    3.78    0.55
  -4  -1  -6    3.29    0.63
   4   1   6    2.64    0.51
   4   1   6    4.10    0.61
  -5  -1  -6   57.66    2.15
  -5  -1  -6   56.86    1.93
  -5  -1  -6   56.14    1.92
   5   1   6   58.00    2.09
   5   1   6   54.81    2.01
  -6  -1  -6   -0.03    0.66
  -6  -1  -6    0.41    0.46
  -6  -1  -6    1.00    0.54
   6   1   6    1.41    0.58
   6   1   6    0.99    0.65
  -7  -1  -6    5.73    0.87
  -7  -1  -6    4.28    0.77
  -7  -1  -6    4.52    1.21
   7   1   6    5.34    0.94
   7   1   6    6.76    1.10
  -8  -1  -6    0.43    0.97
  -8  -1  -6    1.68    0.94
  -8  -1  -6    3.33    0.86
   8   1   6    1.55    1.04
   8   1   6    2.66    0.93
  -9  -1  -6   -0.49    1.15
  -9  -1  -6   -0.25    1.26
  -9  -1  -6    1.06    1.23
   9   1   6    2.04    1.14
   9   1   6   -1.23    1.25
 -10  -1  -6   11.65    2.23
 -10  -1  -6   16.89    1.73
 -10  -1  -6   11.44    1.77
  10   1   6   14.98    2.16
  10   1   6   19.38    2.14
  11  -2  -6    3.09    1.98
  11  -2  -6   -1.18    1.80
 -11   2   6   -0.29    1.73
 -11   2   6   -0.13    2.25
 -11   2   6    1.93    1.67
  10  -2  -6   -2.04    1.30
  10  -2  -6   -1.72    1.22
  10  -2  -6    3.06    1.56
 -10   2   6    0.89    1.37
 -10   2   6   -0.01    1.46
 -10   2   6    1.36    1.12
   9  -2  -6   23.03    1.97
   9  -2  -6   20.78    2.04
   9  -2  -6   26.28    2.28
  -9   2   6   23.59    2.06
  -9   2   6   20.43    1.82
   8  -2  -6    5.65    1.21
   8  -2  -6    6.20    1.12
   8  -2  -6    5.01    1.11
  -8   2   6    6.17    1.08
  -8   2   6    6.97    1.05
   7  -2  -6   24.04    1.54
   7  -2  -6   26.64    1.66
   7  -2  -6   22.64    1.69
  -7   2   6   27.64    1.59
  -7   2   6   25.83    1.53
   6  -2  -6   -0.20    0.47
   6  -2  -6    1.13    0.58
   6  -2  -6    0.83    0.62
  -6   2   6    0.09    0.54
  -6   2   6    1.14    0.48
   5  -2  -6   14.47    1.01
   5  -2  -6   13.38    1.09
   5  -2  -6   13.99    1.02
  -5   2   6   15.01    1.04
  -5   2   6   14.13    0.99
   4  -2  -6    4.98    0.64
   4  -2  -6    5.99    0.81
   4  -2  -6    5.74    0.74
  -4   2   6    4.57    0.56
  -4   2   6    5.93    0.67
  -4   2   6    6.07    0.74
   3  -2  -6   13.40    0.83
   3  -2  -6   13.01    0.88
   3  -2  -6   12.07    0.77
  -3   2   6   14.24    0.84
  -3   2   6   13.67    0.74
  -3   2   6   12.56    1.00
   2  -2  -6   35.48    1.36
   2  -2  -6   35.09    1.18
   2  -2  -6   37.29    1.34
  -2   2   6   35.41    1.34
  -2   2   6   35.80    1.31
  -2   2   6   36.61    1.17
   1  -2  -6   24.33    1.07
   1  -2  -6   23.94    0.92
   1  -2  -6   23.57    1.03
  -1   2   6   25.21    1.06
  -1   2   6   24.47    0.88
  -1   2   6   24.87    1.07
   0  -2  -6   93.05    2.43
   0  -2  -6   95.35    2.46
   0   2   6   95.79    2.29
   0   2   6   89.22    2.42
   0   2   6   95.03    2.48
   0   2   6   94.04    2.16
  -1  -2  -6   20.83    0.96
  -1  -2  -6   21.29    0.98
   1   2   6   21.70    1.03
   1   2   6   20.66    0.98
   1   2   6   21.46    0.84
  -2  -2  -6   55.83    1.84
  -2  -2  -6   58.30    1.85
  -2  -2  -6   58.50    1.70
   2   2   6   56.86    1.71
   2   2   6   59.17    1.89
   2   2   6   60.32    1.86
  -3  -2  -6    0.49    0.33
  -3  -2  -6    0.34    0.37
  -3  -2  -6    0.01    0.34
   3   2   6    0.20    0.31
   3   2   6    0.02    0.38
  -4  -2  -6    0.83    0.44
  -4  -2  -6    0.03    0.40
  -4  -2  -6    0.51    0.47
   4   2   6    0.98    0.49
   4   2   6    1.05    0.45
  -5  -2  -6   17.79    1.15
  -5  -2  -6   17.77    1.23
  -5  -2  -6   15.95    1.13
   5   2   6   17.77    1.28
   5   2   6   17.02    1.19
  -6  -2  -6    6.85    1.06
  -6  -2  -6    6.15    0.93
  -6  -2  -6    7.24    0.96
   6   2   6    6.03    0.94
  -7  -2  -6    6.33    1.03
  -7  -2  -6    6.72    1.38
  -7  -2  -6    9.12    1.17
   7   2   6    7.43    1.08
   7   2   6    6.50    1.16
  -8  -2  -6    4.36    1.17
  -8  -2  -6    2.91    1.20
  -8  -2  -6    3.30    1.07
   8   2   6    3.65    1.28
   8   2   6    3.52    1.15
  -9  -2  -6   18.23    1.94
  -9  -2  -6   20.51    2.29
  -9  -2  -6   20.80    2.15
   9   2   6   20.52    2.38
   9   2   6   18.60    2.11
 -10  -2  -6    2.62    1.79
 -10  -2  -6   -0.69    1.56
 -10  -2  -6   -4.11    1.67
  10   2   6   -0.42    1.67
  11  -3  -6    7.72    2.08
  11  -3  -6    5.84    2.08
 -11   3   6    6.52    1.71
 -11   3   6    9.31    2.45
 -11   3   6    7.05    1.77
  10  -3  -6    3.90    1.45
  10  -3  -6    0.95    1.57
  10  -3  -6    2.90    1.61
 -10   3   6    0.70    1.56
 -10   3   6    1.07    1.31
 -10   3   6    2.41    1.19
   9  -3  -6    0.16    1.03
   9  -3  -6   -0.18    1.04
   9  -3  -6   -0.02    1.25
  -9   3   6   -0.06    0.89
  -9   3   6    1.30    1.20
  -9   3   6    0.99    1.24
   8  -3  -6   22.41    1.99
   8  -3  -6   21.69    1.79
   8  -3  -6   21.41    1.66
  -8   3   6   23.71    1.72
  -8   3   6   23.37    1.60
   7  -3  -6    0.58    0.71
   7  -3  -6   -0.40    0.65
   7  -3  -6   -0.46    0.68
  -7   3   6    0.03    0.75
  -7   3   6   -0.38    0.55
   6  -3  -6   41.01    1.86
   6  -3  -6   41.26    1.95
   6  -3  -6   41.53    1.78
  -6   3   6   44.94    1.85
  -6   3   6   41.31    1.74
   5  -3  -6   15.47    1.07
   5  -3  -6   14.34    0.96
   5  -3  -6   14.95    1.17
  -5   3   6   14.37    1.05
  -5   3   6   16.64    1.05
   4  -3  -6  118.53    3.21
   4  -3  -6  118.12    3.27
   4  -3  -6  116.81    2.99
  -4   3   6  120.74    2.99
  -4   3   6  117.80    3.14
  -4   3   6  121.58    3.18
   3  -3  -6    0.42    0.39
   3  -3  -6    0.18    0.28
   3  -3  -6    0.14    0.34
  -3   3   6   -0.01    0.22
  -3   3   6   -0.09    0.29
  -3   3   6    0.63    0.37
   2  -3  -6    9.26    0.80
   2  -3  -6    8.43    0.58
   2  -3  -6    8.35    0.66
  -2   3   6    8.05    0.52
  -2   3   6    7.82    0.69
   1  -3  -6   14.95    0.89
   1  -3  -6   14.19    0.90
  -1   3   6   13.58    0.84
  -1   3   6   12.70    1.31
  -1   3   6   14.19    0.64
   0  -3  -6   25.18    1.16
   0  -3  -6   24.69    1.13
   0   3   6   26.12    1.16
   0   3   6   24.15    1.19
   0   3   6   23.95    0.78
   0   3   6   25.51    0.93
  -1  -3  -6  113.70    2.98
  -1  -3  -6  115.30    3.03
   1   3   6  113.39    3.03
   1   3   6  111.53    2.59
  -2  -3  -6    4.18    0.48
  -2  -3  -6    6.66    0.71
  -2  -3  -6    5.57    0.70
   2   3   6    5.25    0.62
   2   3   6    5.72    0.76
  -3  -3  -6   48.97    1.84
  -3  -3  -6   48.35    1.85
  -3  -3  -6   49.78    1.69
   3   3   6   47.60    1.89
   3   3   6   49.89    1.87
  -4  -3  -6    0.02    0.46
  -4  -3  -6    0.04    0.48
  -4  -3  -6    1.06    0.56
   4   3   6    1.06    0.50
   4   3   6    0.73    0.58
  -5  -3  -6   19.01    1.30
  -5  -3  -6   24.15    1.45
  -5  -3  -6   20.25    1.39
   5   3   6   19.84    1.50
   5   3   6   22.11    1.43
  -6  -3  -6    1.16    0.79
  -6  -3  -6    1.61    0.81
   6   3   6    1.05    0.89
  -7  -3  -6    1.02    0.91
  -7  -3  -6    0.65    0.97
  -7  -3  -6    1.84    1.01
   7   3   6    1.30    1.03
   7   3   6    0.67    0.76
  -8  -3  -6   16.28    2.04
  -8  -3  -6   17.00    1.88
  -8  -3  -6   16.11    1.90
   8   3   6   14.86    1.83
   8   3   6   13.88    1.93
  -9  -3  -6    1.11    1.59
  -9  -3  -6   -1.10    1.48
  -9  -3  -6   -0.92    1.48
   9   3   6    1.71    1.45
   9   3   6   -0.10    1.61
 -10  -3  -6   17.72    2.34
 -10  -3  -6   19.97    2.87
 -10  -3  -6   16.92    2.26
  10   3   6   19.05    2.67
  11  -4  -6   17.90    2.63
  11  -4  -6   22.07    2.62
 -11   4   6   21.76    2.59
 -11   4   6   22.82    2.99
 -11   4   6   26.11    2.38
  10  -4  -6    2.18    1.71
  10  -4  -6   -1.51    1.39
  10  -4  -6    2.40    1.50
 -10   4   6   -1.13    1.46
 -10   4   6    0.25    1.64
   9  -4  -6   19.58    1.97
   9  -4  -6   17.57    1.92
   9  -4  -6   21.42    2.38
  -9   4   6   20.79    1.74
  -9   4   6   23.07    2.00
  -9   4   6   20.86    2.23
   8  -4  -6    4.84    1.26
   8  -4  -6    3.62    1.22
   8  -4  -6    3.60    1.00
  -8   4   6    6.04    1.08
  -8   4   6    4.52    1.13
  -8   4   6    5.28    0.94
   7  -4  -6   36.70    1.96
   7  -4  -6   38.68    2.10
   7  -4  -6   35.00    1.78
  -7   4   6   37.02    1.72
  -7   4   6   35.85    1.83
  -7   4   6   35.81    1.93
   6  -4  -6   -0.29    0.55
   6  -4  -6    1.05    0.65
   6  -4  -6    0.80    0.71
  -6   4   6    1.70    0.66
  -6   4   6    0.45    0.55
   5  -4  -6    1.85    0.61
   5  -4  -6    0.81    0.58
   5  -4  -6    1.03    0.48
  -5   4   6    1.21    0.58
  -5   4   6    0.68    0.45
   4  -4  -6   23.39    1.07
   4  -4  -6   22.32    1.34
   4  -4  -6   23.71    1.26
  -4   4   6   22.34    1.18
  -4   4   6   23.08    1.27
   3  -4  -6    1.29    0.44
   3  -4  -6    1.84    0.37
   3  -4  -6    2.18    0.61
  -3   4   6    1.84    0.45
  -3   4   6    1.67    0.48
  -3   4   6    1.26    0.29
   2  -4  -6   19.09    1.07
   2  -4  -6   17.99    0.80
   2  -4  -6   16.95    1.10
  -2   4   6   18.62    1.11
  -2   4   6   18.86    1.05
  -2   4   6   19.69    0.75
   1  -4  -6    3.11    0.57
  -1   4   6    3.47    0.55
  -1   4   6    2.60    0.57
  -1   4   6    2.92    0.22
  -1   4   6    3.33    0.35
   0  -4  -6   13.97    0.98
   0  -4  -6   13.87    0.95
   0   4   6   13.87    0.93
   0   4   6   13.84    0.98
   0   4   6   12.93    0.68
  -1  -4  -6    5.86    0.73
  -1  -4  -6    6.52    0.76
   1   4   6    5.55    0.70
   1   4   6    6.17    0.80
  -2  -4  -6   14.98    1.09
  -2  -4  -6   16.43    1.11
  -2  -4  -6   15.22    0.78
   2   4   6   14.46    1.05
   2   4   6   14.88    1.12
  -3  -4  -6   14.25    0.91
  -3  -4  -6   14.75    1.15
  -3  -4  -6   13.70    1.11
   3   4   6   14.94    1.22
   3   4   6   16.35    1.09
  -4  -4  -6    2.38    0.59
  -4  -4  -6    1.53    0.65
  -4  -4  -6    1.70    0.70
   4   4   6    1.88    0.76
   4   4   6    1.89    0.63
  -5  -4  -6   10.67    1.18
  -5  -4  -6    9.58    1.21
  -5  -4  -6   11.49    1.26
   5   4   6    8.70    1.19
   5   4   6    9.99    1.48
  -6  -4  -6    1.42    0.80
  -6  -4  -6    3.41    0.99
  -6  -4  -6    1.15    0.93
   6   4   6    0.99    0.99
   6   4   6    1.75    0.93
  -7  -4  -6   11.99    1.53
  -7  -4  -6   11.51    1.48
  -7  -4  -6    8.58    1.36
   7   4   6   11.29    1.62
   7   4   6   10.92    1.55
  -8  -4  -6    9.26    1.76
  -8  -4  -6    8.62    1.61
  -8  -4  -6    8.23    1.80
   8   4   6    5.92    1.41
   8   4   6    8.54    1.70
  -9  -4  -6   21.62    2.66
  -9  -4  -6   15.79    2.15
  -9  -4  -6   16.79    2.34
   9   4   6   17.18    2.31
  10  -5  -6    4.85    1.87
  10  -5  -6   11.20    1.75
  10  -5  -6    6.10    1.78
 -10   5   6    6.11    1.75
 -10   5   6    5.97    1.27
 -10   5   6    8.56    1.40
   9  -5  -6   18.55    2.13
   9  -5  -6   17.31    2.03
   9  -5  -6   22.81    2.06
  -9   5   6   18.29    1.64
  -9   5   6   16.15    1.89
  -9   5   6   18.06    1.91
   8  -5  -6   16.80    1.93
   8  -5  -6   18.44    1.67
   8  -5  -6   16.80    1.66
  -8   5   6   20.23    1.79
  -8   5   6   15.30    1.62
  -8   5   6   18.20    1.44
   7  -5  -6   -0.11    0.83
   7  -5  -6    1.01    0.75
   7  -5  -6    0.72    1.01
  -7   5   6   -0.11    0.72
  -7   5   6   -0.27    0.76
  -7   5   6    0.67    0.65
   6  -5  -6   55.07    2.46
   6  -5  -6   58.26    2.05
   6  -5  -6   55.88    2.33
  -6   5   6   57.00    2.19
  -6   5   6   55.51    2.04
  -6   5   6   59.05    2.09
   5  -5  -6    2.20    0.73
   5  -5  -6    0.52    0.61
   5  -5  -6    2.11    0.50
  -5   5   6    1.97    0.45
  -5   5   6    1.53    0.64
  -5   5   6    1.31    0.51
   4  -5  -6   78.03    2.10
   4  -5  -6   79.49    2.63
   4  -5  -6   77.66    2.67
  -4   5   6   76.16    2.46
  -4   5   6   78.67    2.05
  -4   5   6   78.25    2.42
   3  -5  -6    6.36    0.56
   3  -5  -6    6.93    0.93
   3  -5  -6    5.75    0.82
  -3   5   6    7.38    0.94
  -3   5   6    6.79    0.40
  -3   5   6    6.60    0.47
  -3   5   6    7.36    0.76
   2  -5  -6   18.39    1.16
   2  -5  -6   17.80    1.23
  -2   5   6   17.96    0.71
  -2   5   6   18.10    1.07
  -2   5   6   17.88    1.19
   1  -5  -6   11.60    0.97
   1  -5  -6   12.28    1.04
  -1   5   6   11.22    0.56
  -1   5   6   12.05    1.01
  -1   5   6   10.99    0.92
   0  -5  -6   13.08    1.03
   0  -5  -6   13.43    1.07
   0   5   6   13.60    1.00
   0   5   6   13.04    1.07
   0   5   6   12.70    0.66
  -1  -5  -6   55.67    2.14
  -1  -5  -6   57.20    2.19
   1   5   6   57.78    2.16
   1   5   6   57.30    2.11
  -2  -5  -6    1.24    0.35
  -2  -5  -6   -0.81    0.53
  -2  -5  -6    1.35    0.61
   2   5   6    1.59    0.67
  -3  -5  -6   51.83    1.77
  -3  -5  -6   51.19    2.42
  -3  -5  -6   56.65    2.33
   3   5   6   54.40    2.20
   3   5   6   51.40    2.27
  -4  -5  -6   -0.42    0.47
  -4  -5  -6    0.09    0.79
  -4  -5  -6   -1.09    0.62
   4   5   6    0.99    0.80
   4   5   6   -0.10    0.72
  -5  -5  -6   18.76    1.49
  -5  -5  -6   20.71    1.74
  -5  -5  -6   21.12    1.74
   5   5   6   18.77    1.77
   5   5   6   19.68    1.60
  -6  -5  -6    1.92    0.94
  -6  -5  -6    0.53    1.01
  -6  -5  -6    1.97    1.08
   6   5   6    2.67    0.97
   6   5   6    4.18    1.15
  -7  -5  -6    3.96    1.19
  -7  -5  -6    3.17    1.34
  -7  -5  -6    1.56    1.25
   7   5   6    4.19    1.34
   7   5   6    2.45    1.40
  -8  -5  -6    8.82    1.93
  -8  -5  -6   10.94    2.01
  -8  -5  -6   11.31    1.93
   8   5   6    7.91    2.05
   8   5   6    6.04    1.79
  -9  -5  -6    1.14    2.07
  -9  -5  -6    1.53    2.41
  10  -6  -6    4.69    2.21
  10  -6  -6    5.85    1.68
  10  -6  -6    4.61    1.98
 -10   6   6    3.20    1.10
 -10   6   6    7.56    1.87
   9  -6  -6   10.86    1.80
   9  -6  -6   11.51    1.55
   9  -6  -6   12.71    1.80
  -9   6   6   15.96    1.81
  -9   6   6   10.53    1.62
  -9   6   6   11.65    1.44
   8  -6  -6    2.03    1.31
   8  -6  -6    0.58    1.13
   8  -6  -6    1.79    0.99
  -8   6   6    1.67    0.76
  -8   6   6    1.20    0.99
  -8   6   6    0.83    0.97
   7  -6  -6   11.10    1.40
   7  -6  -6   10.13    1.21
   7  -6  -6   12.39    1.53
  -7   6   6    9.24    1.10
  -7   6   6   11.16    1.24
  -7   6   6   13.00    1.20
   6  -6  -6    0.65    0.92
   6  -6  -6    1.36    0.55
   6  -6  -6   -0.87    0.87
  -6   6   6    0.67    0.75
  -6   6   6    0.01    0.58
  -6   6   6    0.75    0.48
   5  -6  -6    2.90    0.93
   5  -6  -6    3.26    0.53
   5  -6  -6    0.84    0.69
  -5   6   6    2.14    0.76
  -5   6   6    2.85    0.46
  -5   6   6    3.33    0.71
   4  -6  -6   -1.56    0.58
   4  -6  -6    0.03    0.31
   4  -6  -6    0.53    0.63
  -4   6   6    0.34    0.22
  -4   6   6    0.55    0.50
  -4   6   6   -0.35    0.63
   3  -6  -6    5.18    0.84
   3  -6  -6    4.88    0.95
  -3   6   6    5.07    0.85
  -3   6   6    4.97    0.72
   2  -6  -6   34.18    1.72
  -2   6   6   32.49    0.92
  -2   6   6   34.78    1.56
  -2   6   6   33.41    1.60
   1  -6  -6    6.60    0.93
   1  -6  -6    5.35    0.87
  -1   6   6    7.66    0.89
  -1   6   6    8.92    0.47
  -1   6   6    7.78    0.98
   0  -6  -6   17.14    1.32
   0  -6  -6   15.93    1.26
   0   6   6   13.68    1.12
   0   6   6   18.27    1.27
   0   6   6   15.22    0.73
  -1  -6  -6    1.89    0.75
  -1  -6  -6    1.16    0.73
   1   6   6   -0.22    0.56
   1   6   6    1.35    0.67
   1   6   6    0.67    0.34
  -2  -6  -6    0.69    0.61
  -2  -6  -6    0.71    0.31
  -2  -6  -6   -0.60    0.68
   2   6   6    0.57    0.82
   2   6   6    0.48    0.66
  -3  -6  -6    5.44    1.14
  -3  -6  -6    5.27    0.67
  -3  -6  -6    5.41    1.06
   3   6   6    5.13    1.05
  -4  -6  -6   12.00    1.47
  -4  -6  -6   10.13    1.36
  -4  -6  -6   10.32    1.04
   4   6   6   10.40    1.42
   4   6   6    9.60    1.31
  -5  -6  -6    9.23    1.20
  -5  -6  -6    7.64    1.40
  -5  -6  -6   10.68    1.53
   5   6   6    8.69    1.36
   5   6   6    9.89    1.51
  -6  -6  -6   10.09    1.34
  -6  -6  -6   11.61    1.70
  -6  -6  -6    8.43    1.60
   6   6   6   10.17    1.59
   6   6   6    8.75    1.73
  -7  -6  -6   10.84    1.67
  -7  -6  -6    9.58    1.85
  -7  -6  -6   12.98    1.97
   7   6   6   12.37    2.04
   7   6   6   12.11    1.82
  -8  -6  -6    4.53    1.96
  -8  -6  -6    2.77    2.32
   8   6   6    0.45    2.45
   9  -7  -6    1.41    1.76
   9  -7  -6   -0.05    1.48
  -9   7   6    3.11    1.39
  -9   7   6   -0.43    0.78
   8  -7  -6   13.78    1.48
   8  -7  -6   13.56    1.83
   8  -7  -6   12.63    1.93
  -8   7   6   13.04    1.44
  -8   7   6   15.45    1.56
   7  -7  -6    0.69    0.66
   7  -7  -6    0.74    1.21
   7  -7  -6   -1.05    0.98
  -7   7   6   -1.15    0.80
  -7   7   6   -0.26    0.65
  -7   7   6   -0.71    0.66
   6  -7  -6   42.39    1.54
   6  -7  -6   42.46    2.41
   6  -7  -6   42.25    2.22
  -6   7   6   40.18    1.55
  -6   7   6   43.13    1.98
  -6   7   6   47.08    1.82
   5  -7  -6    0.43    0.36
   5  -7  -6   -0.02    0.86
  -5   7   6    0.69    0.57
  -5   7   6    0.50    0.32
  -5   7   6    1.59    0.77
   4  -7  -6   43.40    2.19
   4  -7  -6   41.69    2.25
  -4   7   6   46.96    1.86
  -4   7   6   43.89    1.94
   3  -7  -6    4.19    0.90
  -3   7   6    4.71    0.76
  -3   7   6    4.60    0.89
   2  -7  -6   33.06    1.88
   2  -7  -6   34.87    1.88
  -2   7   6   37.79    1.75
  -2   7   6   37.58    1.84
   1  -7  -6   37.99    2.00
   1  -7  -6   42.90    2.02
  -1   7   6   41.75    2.02
  -1   7   6   40.48    1.00
  -1   7   6   40.79    1.89
   0  -7  -6    8.17    1.20
   0  -7  -6    9.06    1.18
   0   7   6    7.94    0.54
   0   7   6    6.29    1.09
   0   7   6   10.40    1.20
  -1  -7  -6   61.32    2.63
  -1  -7  -6   57.33    2.51
   1   7   6   58.65    2.42
   1   7   6   57.81    1.77
  -2  -7  -6    0.31    0.85
  -2  -7  -6    0.32    0.79
   2   7   6    0.88    0.87
   2   7   6   -0.01    0.77
  -3  -7  -6   65.53    1.97
  -3  -7  -6   70.05    2.99
  -3  -7  -6   65.29    2.89
   3   7   6   59.09    2.78
  -4  -7  -6    3.43    0.73
  -4  -7  -6    3.86    1.25
  -4  -7  -6    3.32    1.17
   4   7   6    4.60    1.22
   4   7   6    3.67    1.25
  -5  -7  -6   32.52    2.60
  -5  -7  -6   30.43    2.50
  -5  -7  -6   31.96    1.86
   5   7   6   35.35    2.42
   5   7   6   30.62    2.48
  -6  -7  -6    4.72    1.71
  -6  -7  -6    7.46    2.49
  -6  -7  -6    8.19    1.77
   6   7   6    3.64    1.37
   6   7   6    4.62    1.74
  -7  -7  -6    2.99    1.56
  -7  -7  -6    2.21    2.19
   7   7   6    1.61    2.17
   9  -8  -6    2.73    1.92
   8  -8  -6    6.86    1.76
   8  -8  -6    3.77    0.81
   8  -8  -6    5.32    1.85
  -8   8   6    4.57    1.02
   7  -8  -6    2.36    0.57
   7  -8  -6    1.38    1.59
   7  -8  -6    0.22    1.33
  -7   8   6    1.20    0.70
  -7   8   6    2.98    0.72
   6  -8  -6   -0.03    1.12
   6  -8  -6    2.07    1.09
  -6   8   6    0.93    0.69
  -6   8   6    1.68    0.88
   5  -8  -6    8.03    1.48
   5  -8  -6    7.76    1.31
  -5   8   6    8.53    1.05
  -5   8   6    6.72    1.08
   4  -8  -6    7.38    1.26
   4  -8  -6    9.47    1.38
  -4   8   6    9.89    1.12
  -4   8   6    8.70    1.15
   3  -8  -6    3.78    1.06
   3  -8  -6    6.41    1.32
  -3   8   6    6.04    1.05
  -3   8   6    4.48    0.88
   2  -8  -6   14.41    1.55
   2  -8  -6   10.56    1.37
  -2   8   6   12.35    1.44
  -2   8   6   10.88    1.32
   1  -8  -6   10.11    1.30
   1  -8  -6    8.85    1.30
  -1   8   6    7.81    1.19
  -1   8   6   10.66    1.25
   0  -8  -6    0.42    0.79
   0  -8  -6    0.51    0.88
   0   8   6   -0.25    0.83
   0   8   6    0.23    0.97
   0   8   6    0.21    0.24
   0   8   6    0.68    0.34
  -1  -8  -6    1.16    1.04
  -1  -8  -6    1.05    0.95
   1   8   6    0.40    0.93
   1   8   6   -0.89    0.87
   1   8   6    0.70    0.38
  -2  -8  -6   -0.28    1.04
  -2  -8  -6    0.40    0.96
   2   8   6   -0.21    1.12
   2   8   6    0.34    0.93
  -3  -8  -6    1.67    1.27
  -3  -8  -6    1.30    1.12
   3   8   6    0.04    1.14
   3   8   6    1.32    1.27
  -4  -8  -6    9.89    1.78
  -4  -8  -6    8.24    1.60
  -4  -8  -6    7.95    0.91
   4   8   6    9.32    1.85
  -5  -8  -6    8.49    1.18
  -5  -8  -6    5.75    2.00
  -5  -8  -6    6.98    1.93
   5   8   6    7.02    1.80
   5   8   6    5.10    1.84
   5   8   6    9.35    1.69
  -6  -8  -6    2.48    2.67
  -6  -8  -6    0.46    1.43
   6   8   6    3.84    2.15
   6   8   6    4.06    1.85
   7  -9  -6    0.78    1.82
   7  -9  -6   -1.76    1.41
   6  -9  -6   38.04    2.71
   6  -9  -6   44.89    3.10
   5  -9  -6    0.97    1.25
   5  -9  -6    0.56    1.30
  -5   9   6   -0.01    0.78
  -5   9   6   -0.07    0.90
   4  -9  -6   15.20    1.94
   4  -9  -6   16.79    2.12
  -4   9   6   20.23    1.50
  -4   9   6   21.67    1.73
   3  -9  -6    2.18    1.11
   3  -9  -6    1.04    1.20
  -3   9   6   -0.52    0.79
  -3   9   6   -0.66    1.00
   2  -9  -6   11.32    1.62
   2  -9  -6   11.36    1.66
  -2   9   6   12.31    1.52
  -2   9   6   12.53    1.47
   1  -9  -6   15.90    1.89
   1  -9  -6   13.20    1.70
  -1   9   6   15.17    1.84
   0  -9  -6   -1.04    1.12
   0  -9  -6   -1.04    1.12
   0   9   6    0.61    1.05
   0   9   6    0.94    1.14
  -1  -9  -6   23.80    2.26
  -1  -9  -6   26.07    2.39
   1   9   6   22.89    0.95
   1   9   6   24.75    1.10
   1   9   6   26.59    2.39
   1   9   6   22.66    2.18
  -2  -9  -6    1.85    1.40
  -2  -9  -6    2.35    1.25
   2   9   6   -0.21    0.61
   2   9   6    0.04    1.26
   2   9   6    0.17    1.40
   2   9   6    0.80    0.78
  -3  -9  -6   18.14    2.23
  -3  -9  -6   17.27    2.19
   3   9   6   22.93    1.91
   3   9   6   21.47    2.52
   3   9   6   21.53    2.43
  -4  -9  -6    1.37    1.92
   4   9   6    2.67    1.37
   4   9   6    0.90    1.76
   4   9   6    1.21    1.73
   5   9   6    9.02    1.79
   6 -10  -6    5.41    1.79
   5 -10  -6    7.66    1.96
   5 -10  -6    8.55    1.84
   4 -10  -6   12.90    2.01
   4 -10  -6    8.76    1.95
  -4  10   6   13.48    1.48
  -4  10   6    9.61    1.26
   3 -10  -6    8.31    1.72
   3 -10  -6    7.20    1.72
  -3  10   6    8.08    1.41
  -3  10   6    8.58    1.23
   2 -10  -6    0.13    1.54
   2 -10  -6    1.08    1.41
  -2  10   6    1.66    1.52
   1 -10  -6   14.59    1.91
   1 -10  -6   15.25    1.98
  -1  10   6   15.28    1.90
  -1  10   6   13.96    1.65
   0 -10  -6    0.54    1.38
   0 -10  -6    0.36    1.43
   0  10   6    1.43    1.50
   0  10   6    0.28    1.27
  -1 -10  -6    0.71    1.69
  -1 -10  -6    0.76    1.73
   1  10   6   -0.57    1.50
   1  10   6   -1.14    1.66
  -2 -10  -6   -2.45    1.87
   2  10   6    0.41    0.72
   2  10   6    0.74    1.88
   2  10   6    2.24    1.72
   3  10   6    0.91    2.01
   3  10   6   -3.47    1.86
   3 -11  -6    8.46    2.27
   2 -11  -6    9.38    2.39
   1 -11  -6   13.31    2.37
  -1  11   6   18.16    1.98
  -1  11   6   13.91    1.83
   0 -11  -6    4.20    2.38
   0  11   6    0.77    1.77
   0  11   6    0.76    1.69
   0 -12   7   -1.64    1.56
   0 -12   7   -0.27    1.60
   1 -12   7    1.81    1.45
   1 -12   7    1.31    1.52
   2 -12   7    3.43    1.39
   2 -12   7    5.17    1.42
   3 -12   7    3.09    1.32
   3 -12   7    3.36    1.35
  -3 -11   7   10.50    2.33
   2  11  -7    3.75    0.98
  -2 -11   7    8.19    1.91
  -2 -11   7    4.64    1.80
  -1 -11   7    4.47    1.56
  -1 -11   7    1.51    1.54
   0 -11   7   20.27    1.63
   0 -11   7   27.06    2.19
   0 -11   7   22.04    2.18
   1 -11   7    3.68    1.18
   1 -11   7    3.47    0.94
   1 -11   7    4.23    1.25
   2 -11   7   20.06    1.85
   2 -11   7   22.60    1.57
   2 -11   7   19.85    1.78
   3 -11   7    0.90    0.87
   3 -11   7    0.87    1.09
   3 -11   7    0.33    0.95
   4 -11   7   19.69    1.62
   4 -11   7   20.83    1.69
   4 -11   7   15.96    1.57
   5 -11   7    5.21    1.03
   5 -11   7    3.54    0.94
   6 -11   7    3.65    1.06
   6 -11   7    4.69    1.01
   5  10  -7    5.97    1.80
   5  10  -7    7.98    1.74
   5  10  -7    6.29    1.83
  -5 -10   7    5.46    2.24
   4  10  -7   -0.14    1.38
  -4 -10   7    3.66    1.81
  -4 -10   7    0.10    1.68
   3  10  -7   15.30    1.72
   3  10  -7   11.25    1.40
   3  10  -7   12.74    1.52
  -3 -10   7   12.15    1.89
  -3 -10   7   12.48    1.76
   2  10  -7    2.24    0.94
   2  10  -7    1.47    0.59
   2  10  -7    2.99    0.69
  -2 -10   7    0.73    1.23
  -2 -10   7    1.88    1.28
  -1 -10   7    7.33    1.25
  -1 -10   7    6.68    1.34
   0 -10   7    0.82    0.91
   0 -10   7    0.68    0.87
   1 -10   7    2.02    0.87
   1 -10   7    1.50    0.81
   2 -10   7   -1.32    0.64
   2 -10   7   -0.99    0.71
   2 -10   7    0.92    0.80
   3 -10   7    0.70    0.66
   3 -10   7   -0.06    0.79
   3 -10   7    1.83    0.75
   4 -10   7    9.47    1.02
   4 -10   7   10.14    1.24
   4 -10   7   10.06    1.12
   5 -10   7    0.73    1.00
   5 -10   7   -0.85    0.66
   5 -10   7    1.12    0.71
   6 -10   7    5.81    0.83
   6 -10   7    6.34    0.45
   6 -10   7    5.40    0.53
   7 -10   7    1.53    0.81
   7 -10   7    2.46    0.57
   7 -10   7    2.40    0.88
   6   9  -7    0.37    1.70
   6   9  -7    0.94    1.64
   6   9  -7    0.34    1.83
  -6  -9   7    1.91    2.01
   5   9  -7   15.12    1.85
   5   9  -7   14.72    1.73
   5   9  -7   12.17    1.82
  -5  -9   7    8.49    1.87
  -5  -9   7   12.26    2.02
   4   9  -7    1.38    0.95
   4   9  -7    3.25    1.28
  -4  -9   7    1.42    1.28
  -4  -9   7    1.18    1.36
   3   9  -7    0.52    0.96
   3   9  -7    1.99    0.95
  -3  -9   7    1.09    1.08
  -3  -9   7    1.00    1.10
   2   9  -7    4.96    0.66
   2   9  -7    4.68    0.91
   2   9  -7    4.90    0.97
  -2  -9   7    4.57    1.14
  -2  -9   7    4.58    1.21
   1   9  -7    0.15    0.61
  -1  -9   7    1.09    0.83
  -1  -9   7    0.17    0.84
   0   9  -7   46.82    1.57
   0  -9   7   47.12    2.03
   0  -9   7   43.85    2.02
   1  -9   7    0.42    0.63
   1  -9   7   -0.27    0.55
   1  -9   7    0.24    0.66
   2  -9   7   65.00    2.19
   2  -9   7   66.92    2.19
   2  -9   7   65.70    2.35
   3  -9   7    3.05    0.79
   3  -9   7    2.72    0.30
   3  -9   7    1.97    0.57
   3  -9   7    2.90    0.59
   4  -9   7   18.94    1.11
   4  -9   7   17.10    1.51
   4  -9   7   19.96    0.76
   4  -9   7   18.44    1.04
   5  -9   7   13.50    1.03
   5  -9   7   13.30    0.76
   5  -9   7   13.20    0.94
   5  -9   7   13.62    1.59
   6  -9   7    0.09    0.57
   6  -9   7    0.16    1.12
   6  -9   7    1.33    0.51
   6  -9   7    1.45    0.55
   7  -9   7   21.28    1.28
   7  -9   7   19.26    1.36
   7  -9   7   20.12    1.29
   8  -9   7   -0.29    0.85
   8  -9   7   -0.06    0.88
   8  -9   7   -0.41    0.81
   7   8  -7   -2.10    1.72
   7   8  -7    1.50    1.81
  -7  -8   7    3.96    2.18
   6   8  -7   -2.83    1.29
   6   8  -7    0.51    1.53
   6   8  -7    1.20    1.60
  -6  -8   7   -2.19    1.47
  -6  -8   7    1.63    1.62
   5   8  -7   10.01    1.62
   5   8  -7    7.47    1.20
   5   8  -7    5.99    1.42
  -5  -8   7    7.58    1.58
  -5  -8   7    8.59    1.63
   4   8  -7    5.43    0.97
   4   8  -7    3.73    1.11
  -4  -8   7    3.87    1.20
  -4  -8   7    5.55    1.26
   3   8  -7   19.18    1.58
   3   8  -7   18.61    1.49
   3   8  -7   20.93    1.29
  -3  -8   7   16.92    1.66
  -3  -8   7   19.40    1.78
   2   8  -7    8.57    1.10
  -2  -8   7    7.74    1.08
  -2  -8   7    8.71    1.45
   1   8  -7    4.37    0.48
   1   8  -7    3.61    0.40
   1   8  -7    4.26    0.69
  -1  -8   7    3.61    0.84
  -1  -8   7    3.48    0.84
   0   8  -7    3.70    0.58
   0  -8   7    3.49    0.70
   0  -8   7    3.12    0.71
   1  -8   7    0.27    0.49
   1  -8   7    0.29    0.43
   1  -8   7    0.05    0.30
   2  -8   7    8.32    0.94
   2  -8   7    7.87    0.57
   2  -8   7    7.47    0.69
   3  -8   7    3.29    0.81
   3  -8   7    4.48    0.55
   3  -8   7    3.77    0.54
   3  -8   7    4.15    0.45
   4  -8   7   37.90    1.30
   4  -8   7   40.28    1.92
   4  -8   7   39.50    1.28
   4  -8   7   38.33    1.28
   5  -8   7    3.23    0.53
   5  -8   7    3.08    0.92
   5  -8   7    3.38    0.52
   5  -8   7    3.10    0.49
   6  -8   7    8.55    1.35
   6  -8   7    9.12    0.91
   6  -8   7    8.52    0.90
   6  -8   7    9.65    0.78
   7  -8   7    1.54    0.73
   7  -8   7    2.48    0.55
   7  -8   7    2.24    0.69
   8  -8   7    1.53    0.83
   8  -8   7    1.53    0.73
   9  -8   7    0.64    0.92
   8   7  -7   -1.37    1.72
   8   7  -7    4.19    1.97
   8   7  -7   -0.40    1.83
  -8  -7   7    2.31    2.21
   7   7  -7   18.84    2.08
   7   7  -7   22.26    2.66
   7   7  -7   14.95    2.11
  -7  -7   7   22.31    2.56
  -7  -7   7   21.16    2.52
   6   7  -7   -0.27    1.27
   6   7  -7   -0.44    1.19
   6   7  -7    0.54    1.08
  -6  -7   7   -0.05    1.28
  -6  -7   7    0.04    1.29
   5   7  -7   13.55    1.57
   5   7  -7   11.00    1.57
   5   7  -7   11.47    1.46
  -5  -7   7   14.57    1.69
  -5  -7   7   12.60    1.62
   4   7  -7   11.67    1.36
   4   7  -7   10.73    1.38
   4   7  -7   12.61    1.21
  -4  -7   7   12.46    1.51
  -4  -7   7   11.36    1.40
   3   7  -7    7.19    0.79
   3   7  -7    5.98    0.94
   3   7  -7    5.86    0.83
  -3  -7   7    5.89    0.96
   2   7  -7   23.86    1.31
   2   7  -7   25.52    1.11
   2   7  -7   24.61    1.26
  -2  -7   7   26.25    1.49
  -2  -7   7   22.56    1.44
   1   7  -7   -0.37    0.40
   1   7  -7    0.05    0.30
   1   7  -7    0.32    0.24
  -1  -7   7    0.12    0.47
  -1  -7   7    0.63    0.41
  -1  -7   7   -0.11    0.47
   0   7  -7   41.49    1.46
   0  -7   7   38.75    1.55
   0  -7   7   39.93    1.42
   0  -7   7   41.89    1.57
   1  -7   7    2.13    0.41
   1  -7   7    1.57    0.37
   1  -7   7    1.76    0.43
   2  -7   7   31.61    1.12
   2  -7   7   31.06    1.47
   2  -7   7   30.14    1.09
   2  -7   7   30.63    1.09
   3  -7   7    1.48    0.58
   3  -7   7    1.87    0.41
   3  -7   7    1.89    0.33
   4  -7   7    9.49    0.53
   4  -7   7    9.82    0.58
   4  -7   7   11.22    1.12
   4  -7   7   11.84    0.77
   5  -7   7   21.32    1.50
   5  -7   7   18.72    0.82
   5  -7   7   20.14    0.78
   5  -7   7   19.15    1.07
   6  -7   7    2.32    0.46
   6  -7   7    2.52    0.44
   6  -7   7    3.07    0.58
   7  -7   7   18.79    1.05
   7  -7   7   20.64    1.18
   8  -7   7    1.23    0.63
   8  -7   7    0.70    0.77
  -9   7  -7   20.50    2.45
   9  -7   7   20.86    1.77
   9  -7   7   22.39    1.60
 -10   7  -7   -0.10    2.05
  10  -7   7    3.96    1.35
   9   6  -7   -1.90    2.11
   8   6  -7    1.40    1.49
   8   6  -7    0.40    1.52
   8   6  -7    0.46    1.68
  -8  -6   7    3.43    1.76
  -8  -6   7    0.45    1.60
   7   6  -7    1.38    1.21
   7   6  -7    1.79    1.30
   7   6  -7    0.83    1.21
  -7  -6   7    0.46    1.23
  -7  -6   7    0.39    1.41
   6   6  -7   11.36    1.61
   6   6  -7    9.54    1.34
   6   6  -7   12.30    1.50
  -6  -6   7   10.18    1.49
  -6  -6   7    8.59    1.42
   5   6  -7    9.63    1.21
   5   6  -7    8.27    1.25
  -5  -6   7   10.75    1.37
  -5  -6   7   10.24    1.35
   4   6  -7   28.17    1.69
   4   6  -7   34.64    1.64
   4   6  -7   27.69    1.65
  -4  -6   7   30.71    1.79
  -4  -6   7   30.33    1.82
   3   6  -7    6.45    0.80
   3   6  -7    5.49    0.78
   3   6  -7    6.04    0.90
  -3  -6   7    6.25    0.91
  -3  -6   7    5.30    0.88
   2   6  -7   13.98    0.83
   2   6  -7   14.92    1.02
   2   6  -7   16.03    0.97
  -2  -6   7   13.72    0.97
  -2  -6   7   15.42    1.12
  -2  -6   7   13.88    1.04
   1   6  -7    1.43    0.33
  -1  -6   7    1.50    0.50
  -1  -6   7    1.71    0.45
  -1  -6   7    1.98    0.47
   0   6  -7    8.26    0.70
   0  -6   7    7.77    0.67
   0  -6   7    7.72    0.64
   0  -6   7    8.30    0.69
   1  -6   7    5.78    0.53
   1  -6   7    6.12    0.55
   1  -6   7    6.67    0.54
   2  -6   7    2.02    0.52
   2  -6   7    1.49    0.32
   2  -6   7    2.05    0.29
   2  -6   7    1.78    0.28
   3  -6   7   15.65    0.52
   3  -6   7   16.47    1.11
   3  -6   7   15.12    0.50
   3  -6   7   15.47    0.83
   4  -6   7    7.06    0.91
   4  -6   7    7.71    0.35
   4  -6   7    8.19    0.71
   4  -6   7    7.33    0.38
   5  -6   7   16.24    0.65
   5  -6   7   16.52    0.70
   5  -6   7   18.67    1.46
   6  -6   7    5.41    1.09
   6  -6   7    4.58    0.54
   6  -6   7    4.55    0.52
  -7   6  -7   11.04    1.38
   7  -6   7    9.68    0.95
   7  -6   7   11.95    0.83
  -8   6  -7    1.44    1.10
   8  -6   7    1.02    0.67
   8  -6   7   -0.01    0.55
  -9   6  -7    1.65    1.38
   9  -6   7    1.33    0.98
   9  -6   7    1.84    0.83
 -10   6  -7    6.34    1.98
  10  -6   7    6.49    1.45
  10  -6   7    7.96    1.42
   9   5  -7   16.36    2.54
   9   5  -7   15.69    2.26
   9   5  -7   15.74    2.57
  -9  -5   7   17.98    2.49
   8   5  -7    0.84    1.53
   8   5  -7   -2.10    1.38
   8   5  -7    1.14    1.33
  -8  -5   7    0.56    1.35
  -8  -5   7    2.03    1.43
   7   5  -7   21.30    2.05
   7   5  -7   20.01    1.88
   7   5  -7   20.96    2.04
  -7  -5   7   23.20    2.04
  -7  -5   7   25.34    2.12
   6   5  -7    2.26    0.95
   6   5  -7    0.82    0.92
   6   5  -7    0.27    0.77
  -6  -5   7    0.45    0.92
  -6  -5   7    1.78    0.97
   5   5  -7    8.68    1.10
   5   5  -7    9.19    1.22
   5   5  -7    9.70    1.21
  -5  -5   7   11.57    1.34
  -5  -5   7   10.72    1.26
   4   5  -7   40.89    1.72
   4   5  -7   39.15    1.79
   4   5  -7   41.45    1.88
  -4  -5   7   42.43    1.94
  -4  -5   7   44.43    1.96
   3   5  -7   12.63    1.02
   3   5  -7   11.71    1.02
   3   5  -7   11.31    0.85
  -3  -5   7   12.07    0.98
  -3  -5   7   12.46    1.03
  -3  -5   7   12.11    1.03
   2   5  -7   28.76    1.21
   2   5  -7   30.80    1.34
   2   5  -7   29.37    1.13
  -2  -5   7   29.77    1.33
  -2  -5   7   30.18    1.37
  -2  -5   7   30.09    1.35
   1   5  -7    2.92    0.34
   1   5  -7    2.88    0.39
   1   5  -7    2.64    0.48
  -1  -5   7    2.69    0.49
  -1  -5   7    2.87    0.49
  -1  -5   7    2.48    0.43
   0   5  -7  146.61    3.42
   0  -5   7  144.17    3.27
   0  -5   7  147.65    3.32
   0  -5   7  145.30    3.41
  -1   5  -7   -0.02    0.29
   1  -5   7    0.57    0.21
   1  -5   7    1.06    0.31
   1  -5   7    0.67    0.21
   2  -5   7   96.09    2.67
   2  -5   7   96.61    2.40
   2  -5   7   87.89    1.83
   2  -5   7   92.66    1.85
   3  -5   7   43.33    1.71
   3  -5   7   44.27    1.47
   4  -5   7   24.96    1.38
   4  -5   7   23.25    1.10
   4  -5   7   24.54    0.55
   5  -5   7   22.10    0.75
   5  -5   7   22.94    1.44
   5  -5   7   22.63    0.81
  -6   5  -7    3.42    0.85
   6  -5   7    3.16    0.86
   6  -5   7    2.92    0.40
   6  -5   7    2.94    0.50
   7  -5   7   43.45    1.54
   7  -5   7   39.08    1.59
  -8   5  -7    0.63    0.97
   8  -5   7    1.40    0.54
   8  -5   7    0.57    0.70
  -9   5  -7   28.76    2.42
   9  -5   7   26.66    1.66
 -10   5  -7    1.21    1.67
  10  -5   7    0.84    1.08
  10  -5   7   -0.60    1.26
  10   4  -7    0.50    2.45
 -10  -4   7    3.55    2.68
   9   4  -7    3.69    1.42
   9   4  -7    5.10    1.69
   9   4  -7    0.28    1.58
  -9  -4   7    4.91    1.72
  -9  -4   7    4.98    1.62
   8   4  -7    1.16    1.33
   8   4  -7    1.05    1.08
   8   4  -7   -0.65    1.36
  -8  -4   7   -0.41    1.02
  -8  -4   7    0.12    1.18
   7   4  -7   -0.12    0.99
   7   4  -7    0.52    0.91
   7   4  -7    0.55    0.97
  -7  -4   7   -0.56    0.89
  -7  -4   7    0.76    0.98
   6   4  -7    1.21    0.89
   6   4  -7    1.99    0.85
   6   4  -7    2.13    0.77
  -6  -4   7    1.27    0.76
  -6  -4   7    2.00    0.85
   5   4  -7    1.55    0.76
   5   4  -7    3.05    0.84
   5   4  -7    1.98    0.64
  -5  -4   7    1.48    0.75
  -5  -4   7    2.62    0.82
   4   4  -7    6.45    0.84
   4   4  -7    7.05    0.78
   4   4  -7    7.10    0.90
  -4  -4   7    6.40    0.91
  -4  -4   7    6.05    0.87
   3   4  -7    0.39    0.43
   3   4  -7    1.05    0.49
   3   4  -7    1.34    0.41
  -3  -4   7    0.21    0.41
  -3  -4   7    1.74    0.48
  -3  -4   7    0.38    0.41
   2   4  -7   10.20    0.74
   2   4  -7   11.12    0.65
   2   4  -7    9.98    0.84
  -2  -4   7    9.48    0.76
  -2  -4   7    9.78    0.77
  -2  -4   7    9.86    0.76
   1   4  -7   -0.01    0.16
   1   4  -7   -0.13    0.32
   1   4  -7    0.02    0.22
  -1  -4   7    0.09    0.26
  -1  -4   7   -0.09    0.22
  -1  -4   7    0.12    0.30
   0   4  -7    1.61    0.36
   0  -4   7    1.47    0.28
   0  -4   7    1.97    0.37
   0  -4   7    1.10    0.28
  -1   4  -7    3.44    0.46
   1  -4   7    3.53    0.42
   1  -4   7    3.52    0.25
   1  -4   7    3.40    0.25
   2  -4   7    1.68    0.53
   2  -4   7    1.60    0.34
   3  -4   7   31.59    1.24
   3  -4   7   31.96    1.43
   4  -4   7   16.60    0.51
   4  -4   7   16.19    0.48
   4  -4   7   17.18    1.16
  -5   4  -7   17.93    1.25
   5  -4   7   17.60    1.33
   5  -4   7   18.48    0.72
   5  -4   7   17.88    0.76
  -6   4  -7    1.28    0.71
   6  -4   7    1.93    0.82
   6  -4   7    1.72    0.47
   6  -4   7    1.32    0.36
  -7   4  -7   20.39    1.91
   7  -4   7   19.20    1.21
   7  -4   7   18.40    1.07
  -8   4  -7    8.45    1.30
   8  -4   7    7.35    1.01
   8  -4   7    7.32    0.88
  -9   4  -7    2.30    1.16
   9  -4   7    1.19    0.75
   9  -4   7    2.21    0.97
 -10   4  -7    9.34    1.83
  10  -4   7    6.05    1.45
  10  -4   7    8.26    1.34
  11  -4   7    2.66    1.48
  11  -4   7   -1.09    1.64
  10   3  -7    1.42    1.66
 -10  -3   7   -0.48    1.90
 -10  -3   7   -1.73    1.82
   9   3  -7   11.91    1.90
   9   3  -7   12.32    1.72
   9   3  -7   12.78    1.89
  -9  -3   7   13.44    1.84
  -9  -3   7   15.40    1.91
   8   3  -7   -0.39    1.11
   8   3  -7    0.35    1.14
   8   3  -7   -1.23    0.91
  -8  -3   7    0.03    1.05
  -8  -3   7    1.14    1.08
   7   3  -7   28.79    1.97
   7   3  -7   28.15    1.81
   7   3  -7   29.76    1.87
  -7  -3   7   32.89    1.99
  -7  -3   7   30.60    1.98
   6   3  -7   -0.71    0.51
   6   3  -7    0.24    0.72
  -6  -3   7   -0.56    0.61
  -6  -3   7    0.93    0.58
   5   3  -7   20.99    1.40
   5   3  -7   21.88    1.32
   5   3  -7   22.21    1.36
  -5  -3   7   21.63    1.42
  -5  -3   7   22.46    1.41
   4   3  -7   38.73    1.70
   4   3  -7   40.29    1.73
   4   3  -7   38.88    1.59
  -4  -3   7   40.24    1.69
  -4  -3   7   38.62    1.63
  -4  -3   7   39.08    1.69
   3   3  -7    6.57    0.77
   3   3  -7    7.26    0.79
   3   3  -7    6.87    0.68
  -3  -3   7    6.76    0.72
[truncated: 604,798 more chars]
